# Supplementary material for: ERV14 receptor impacts mycelial growth via its interactions with cell wall synthase and transporters in Aspergillus niger
Source: Front Microbiol. 2023 Apr 11;14:1128462. doi: 10.3389/fmicb.2023.1128462 (PMC10126429; doi:10.3389/fmicb.2023.1128462)
Supplement: Supplementary file 2 [file Table_1.xlsx]

## Sheet: Plasmid Library
Geneid	Gene_Symbol	Gene_Description	PL_reads	PL_FPKM
An15g03940		Putative monosaccharide transporter; AmyR dependant induction on maltose	4223921	153682
An12g10200		Putative cell wall protein with internal repeats; induced by caspofungin	606117	39452.2
An18g05640		Ortholog of A. nidulans FGSC A4 : AN4252, AN10165, A. fumigatus Af293 : Afu1g06580/hel10, Afu1g11910, A. niger CBS 513.88 : An08g04120 and A. oryzae RIB40 : AO090001000456, AO090001000373	386606	37631.3
An04g06510		Ortholog of A. nidulans FGSC A4 : AN2000/ubi4, A. fumigatus Af293 : Afu4g10350/ubiD, A. oryzae RIB40 : AO090003001182/ubiB, Aspergillus wentii : Aspwe1_0047475 and Aspergillus sydowii : Aspsy1_0053937	370213	22280.3
An16g01830	gpdA	Glyceraldehyde-3-phosphate dehydrogenase	495144	22017.1
An05g02100		Alpha-amylase (1, 4-alpha-D-glucan 4-glucanohydrolase), hydrolyzes the alpha-1,4-glucosidic bonds in glycogen or starch; identical to An12g06930; AmyR-regulated	672608	21042.8
An17g00910		Gamma-aminobutyrate transaminase	493879	18627.2
An12g06930	amyA	Alpha-amylase (1, 4-alpha-D-glucan 4-glucanohydrolase), hydrolyzes the alpha-1,4-glucosidic bonds in glycogen or starch; identical to An05g02100	478432	14960.6
An14g01068		Ortholog(s) have extracellular region localization	115338	12988.9
An14g01840		Ortholog of A. nidulans FGSC A4 : AN3215, AN7166, AN8609, A. fumigatus Af293 : Afu3g14210, Afu4g03360, Afu4g12510 and A. niger CBS 513.88 : An09g04200	113526	12142.4
An03g06550	glaA	1,4-alpha-D-glucan glucohydrolase; secreted glucoamylase; most highly expressed at the periphery of colonies; repressed by xylose and induced by maltose; AmyR dependant induction on maltose	406151	11940.2
An16g05930		Ortholog of A. nidulans FGSC A4 : AN3975, AN9193/llmJ, AN2891 and A. fumigatus Af293 : Afu1g10150, Afu2g04380, Afu3g15150, Afu3g15280, Afu6g03300	161592	11426.6
An18g04220		ADP/ATP translocase; antiporter	230568	9654.13
An02g01550		Secreted serine protease	65937	9356.23
An15g07090		Ortholog of A. niger CBS 513.88 : An12g10350, Neosartorya fischeri NRRL 181 : NFIA_091810, Aspergillus wentii : Aspwe1_0171052 and Aspergillus versicolor : Aspve1_0080842	54110	8769.31
An02g03540		Ortholog(s) have fructose transmembrane transporter activity, glucose transmembrane transporter activity, mannose transmembrane transporter activity	238657	8452.06
An01g06280		Ortholog(s) have role in hyphal growth, response to cold, response to heat, response to oxidative stress, response to salt stress, sporocarp development involved in sexual reproduction	80374	7416.41
An09g06410		Ortholog of A. nidulans FGSC A4 : AN9521, AN0790, A. fumigatus Af293 : Afu5g03750, A. oryzae RIB40 : AO090102000585 and Aspergillus wentii : Aspwe1_0174463	86424	6077.61
An01g03480	gutB	Sorbitol dehydrogenase	115621	5542.64
An14g01820	phiA	Putative cell wall protein similar to A. nidulans phiA; abundantly expressed on d-xylose; induced by caspofungin	52577	5380.16
An07g09050		Ortholog of A. nidulans FGSC A4 : AN6760, AN8527, A. fumigatus Af293 : Afu4g01400, Afu5g02670, Afu5g14240, A. niger CBS 513.88 : An08g09630 and Aspergillus wentii : Aspwe1_0069899, Aspwe1_0185315, Aspwe1_0186212	62394	5187.59
An16g03330		Ortholog(s) have fungal-type cell wall localization	43335	5095.92
An13g02730		Ortholog of A. nidulans FGSC A4 : AN8483, Neosartorya fischeri NRRL 181 : NFIA_001870, Aspergillus wentii : Aspwe1_0175506 and Aspergillus versicolor : Aspve1_0088786	23791	4948.33
An08g06960		Ortholog(s) have role in DNA methylation, cellular response to DNA damage stimulus, global genome nucleotide-excision repair, rRNA transcription and regulation of DNA methylation, more	44821	4859.04
An01g05230		Ortholog(s) have role in hyphal growth, response to cold, response to heat, response to oxidative stress, response to salt stress, sporocarp development involved in sexual reproduction	51786	4169.88
An12g07450	mstA	High affinity sugar/H+ symporter; regulated by extracellular pH	128563	4160.76
An01g12530	sodB	Manganese superoxide dismutase	47738	4037.4
An06g01000		Protein related to chitinases; expression repressed by tunicamycin and DTT; highly expressed in germinating conidia	56269	3826.38
An04g02610		Succinate-semialdehyde dehydrogenase (NAD(P)+)	99859	3755.2
An11g01660		Ortholog of A. nidulans FGSC A4 : AN3925, A. fumigatus Af293 : Afu6g08390, A. oryzae RIB40 : AO090001000495, Aspergillus wentii : Aspwe1_0120489 and Aspergillus sydowii : Aspsy1_0150601	45440	3405.51
An16g05020		Inositol hexaki-/heptaki-phosphate kinase	45053	3103.33
An11g10090		Ortholog(s) have ribosomal small subunit binding, translation initiation factor activity, translation initiation factor binding activity and role in formation of translation preinitiation complex, maintenance of translational fidelity	34620	2927.95
An08g08840		Glutamate decarboxylase	74906	2808.57
An01g00750		Ortholog of Aspergillus tubingensis : Asptu1_0054330, Aspergillus brasiliensis : Aspbr1_0040606, Aspergillus kawachii : Aspka1_0182240 and Aspergillus acidus : Aspfo1_0040371	13206	2685.5
An14g03080		Ortholog of A. nidulans FGSC A4 : AN2488, A. fumigatus Af293 : Afu3g00500, Afu4g03010, A. oryzae RIB40 : AO090012000174 and Aspergillus wentii : Aspwe1_0176515, Aspwe1_0622364	26012	2632.26
An18g06820	gfaA	Putative glutamine:fructose-6-phosphate amidotransferase; responsible for the first and a rate-limiting step in chitin synthesis; induced by caspofungin	92024	2436.17
An02g03530		Protein of unknown function	27173	2423.31
An02g11150	aglB	Putative alpha-galactosidase variant B; expression is induced on xylan; XlnR regulated	63808	2334.88
An08g03510		Protein of unknown function	84654	2328.93
An07g03660		Protein of unknown function	42629	2151.78
An04g00990	gdhA	NADP-dependent glutamate dehydrogenase; induced by growth on starch and lactate; expression repressed by tunicamycin and DTT	49326	2092.78
An03g06210		Ortholog of A. fumigatus Af293 : Afu8g02120, Neosartorya fischeri NRRL 181 : NFIA_095790, Aspergillus wentii : Aspwe1_0046719 and Aspergillus versicolor : Aspve1_0089590	14207	2047.78
An11g11300		Ortholog(s) have DNA binding activity and role in DNA repair, mitotic chromosome condensation, positive regulation of DNA repair, protein localization to kinetochore	18395	2042.75
An02g07210	pepE	Putative acid aspartic protease, constitutively expressed	42188	1925.55
An12g08610	glkA	Putative glucokinase	44771	1847.95
An15g02040		Ortholog of A. nidulans FGSC A4 : AN6657, A. fumigatus Af293 : Afu6g03400, Neosartorya fischeri NRRL 181 : NFIA_049930, Aspergillus wentii : Aspwe1_0168205 and Aspergillus versicolor : Aspve1_0086179	10725	1747.01
An12g02120		Ortholog of A. nidulans FGSC A4 : AN8062, A. fumigatus Af293 : Afu7g04870, A. oryzae RIB40 : AO090012000050, Neosartorya fischeri NRRL 181 : NFIA_025830 and Aspergillus clavatus NRRL 1 : ACLA_006570	28333	1703.54
An17g01460		Ortholog of Aspergillus acidus : Aspfo1_0084770	12070	1657.44
An01g03160		Ortholog(s) have structural constituent of ribosome activity, role in maturation of SSU-rRNA from tricistronic rRNA transcript (SSU-rRNA, 5.8S rRNA, LSU-rRNA) and cell surface, cytosolic small ribosomal subunit localization	17442	1623.51
An09g06760		Ortholog of A. nidulans FGSC A4 : AN8281, A. fumigatus Af293 : Afu5g04290, A. oryzae RIB40 : AO090102000635, Aspergillus wentii : Aspwe1_0043150 and Aspergillus sydowii : Aspsy1_0094483	24799	1605.98
An07g10020	atg8	Putative autophagy-related ubiquitin modifier; autophagosomal membrane protein; essential for autophagy	13856	1605.72
An13g00630		Protein of unknown function	6130	1565.69
An14g01685		Ortholog of A. nidulans FGSC A4 : AN11171, AN7148, A. fumigatus Af293 : Afu4g03595, A. niger CBS 513.88 : An02g01320, An03g06340 and A. oryzae RIB40 : AO090026000213, AO090026000142, AO090023000130	11400	1555.4
An02g05240		Ortholog(s) have role in histone H3-K79 methylation, sexual sporulation resulting in formation of a cellular spore, transfer RNA gene-mediated silencing and nucleus, replication fork protection complex localization	13423	1538.79
An15g04480		Ortholog(s) have intracellular localization	15952	1529.41
An14g00960		Cysteine synthase	40569	1507.84
An01g09980	aspHS	Hemolysin	11423	1467.6
An17g01360		Ortholog(s) have structural constituent of ribosome activity, role in cytoplasmic translation and cytosolic large ribosomal subunit localization	22910	1459.96
An03g06410	erg25	Putative C-4 methyl sterol oxidase; induced by fenpropimorph	21852	1439.96
An01g05960		Ortholog(s) have carbohydrate binding activity	9357	1429.37
An11g00040		Ortholog of A. nidulans FGSC A4 : AN3008, A. oryzae RIB40 : AO090011000565, Aspergillus niger ATCC 1015 : 46090-mRNA, 52849-mRNA and Aspergillus carbonarius ITEM 5010 : Acar5010_204950	9057	1427.95
An01g08510		Ortholog of A. nidulans FGSC A4 : AN3585, A. fumigatus Af293 : Afu4g12940, A. oryzae RIB40 : AO090009000293, Neosartorya fischeri NRRL 181 : NFIA_103400 and Aspergillus versicolor : Aspve1_0862034	10973	1427.01
An01g05060		Ortholog of A. nidulans FGSC A4 : AN10031, A. fumigatus Af293 : Afu1g02910, A. oryzae RIB40 : AO090005000782, Aspergillus wentii : Aspwe1_0169592 and Aspergillus sydowii : Aspsy1_0076110	24601	1426.76
An07g03880	pepC	Putative vacuolar serine proteinase; putative signal sequence for transport into the endoplasmic reticulum; secreted protein	33766	1330.91
An02g05150		Has domain(s) with predicted cholestenol delta-isomerase activity, role in sterol metabolic process and endoplasmic reticulum, integral component of membrane localization	18929	1325.31
An03g04280		Protein with similarity to pyridoxine synthesis component pyroA of Aspergillus nidulans	21870	1308.79
An06g01610		Putative heat shock protein	8398	1304.72
An15g00560	actA	Actin structural protein	37332	1299.06
An13g01520		Protein of unknown function; expression repressed by tunicamycin and DTT	17488	1295.44
An16g07920		Ortholog(s) have role in response to salt stress	13496	1238.17
An07g09990		Hsp70 protein; induced by growth on starch and lactate	38304	1237.15
An10g00820	oahA	Oxaloacetate acetylhydrolase	21130	1222.12
An08g01180		Has domain(s) with predicted phosphoric diester hydrolase activity and role in lipid metabolic process	27454	1169.47
An07g01960		Putative stearoyl-CoA desaturase	26035	1158.48
An17g02390		Cytoplasmic ribosomal protein of the small subunit RP10B	19548	1151.48
An08g03430		Ortholog(s) have RNA binding, structural constituent of ribosome activity	17839	1141.36
An02g12760		Ortholog(s) have ubiquitin protein ligase binding activity	26417	1128.3
An12g00710		Ortholog(s) have role in conidium formation, negative regulation of conidium formation, positive regulation of sexual sporulation resulting in formation of a cellular spore, sexual sporulation resulting in formation of a cellular spore	14047	1062.74
An04g01230	ecmA	Putative cell wall organization protein	21931	1055.29
An05g01070		Ortholog(s) have role in regulation of phospholipid translocation and plasma membrane localization	16637	1044.57
An15g00070	mdhA	Malate dehydrogenase precursor	24134	1039.84
An01g09610		Ortholog(s) have glutathione binding activity and extracellular region, intracellular localization	11621	1034.92
An01g01610		Ortholog of A. nidulans FGSC A4 : AN11489	1305	1028.75
An01g04240		Putative cytoplasmic acidic ribosomal protein P0	16722	1007.32
An12g10360		Ortholog of A. nidulans FGSC A4 : AN5372, AN7785, A. fumigatus Af293 : Afu5g07450, Afu6g14060, A. niger CBS 513.88 : An08g08280, An15g02880 and A. oryzae RIB40 : AO090103000388, AO090701000652, AO090010000610	18127	981.739
An11g10500		Protein of unknown function	3301	962.466
An16g05920		Similar to membrane protein Pth11 of Magnaporthe grisea; expression repressed by tunicamycin and DTT	23291	921.443
An07g03570		Putative to sorbitol utilization protein	14062	896.114
An09g04240		Ortholog of A. fumigatus Af293 : Afu3g14260, A. oryzae RIB40 : AO090012000670, Neosartorya fischeri NRRL 181 : NFIA_063040 and Aspergillus wentii : Aspwe1_0038047	8827	880.678
An13g00760	tpm1	Tropomyosin	10837	875.923
An18g02020	tigA	Protein disulfide isomerase; suggested to facilitate the folding of nascent polypeptides; expression enhanced by maltose; expression induced by tunicamycin and DTT	15587	868.484
An11g11310		Ortholog(s) have nucleus, replication fork protection complex, site of double-strand break localization	7953	868.079
An18g03810		Ortholog(s) have RNA binding activity	15204	861.426
An17g01530	adhA	Alcohol-dehydrogenase	15620	859.078
An01g13190		Ortholog(s) have structural constituent of ribosome activity, role in rRNA export from nucleus and cytosolic small ribosomal subunit, extracellular region, membrane localization	13101	857.114
An07g04620		Ortholog(s) have role in conidiophore development, hyphal growth, regulation of MAP kinase activity, response to cold, response to heat, sporocarp development involved in sexual reproduction, syncytium formation by plasma membrane fusion	11550	840.943
An14g05070		Ortholog(s) have role in cellular response to farnesol, cellular response to heat, cellular response to hydrogen peroxide, sterigmatocystin biosynthetic process and cytoplasm, peroxisome localization	12600	837.204
An02g01760		Ortholog(s) have role in calcium ion homeostasis, calcium-mediated signaling, cellular response to calcium ion and cytoplasm localization	11432	811.08
An11g06160		Proline dehydrogenase	18622	796.435
An02g07010		Protein similar to ubiquitin UBI1 of A. nidulans	7523	792.688
An12g07470		Ortholog of A. oryzae RIB40 : AO090026000772, Neosartorya fischeri NRRL 181 : NFIA_049400, Aspergillus wentii : Aspwe1_0168197 and Aspergillus clavatus NRRL 1 : ACLA_097350	6564	792.313
An14g04180		F1F0-ATPase complex subunit	7358	767.701
An08g03690		Putative ADP-ribosylation factor; expression enhanced by maltose	10645	759.463
An06g02270		Has domain(s) with predicted transmembrane transporter activity, role in transmembrane transport and integral component of membrane, membrane localization	19863	749.598
An07g04570	hexA	Putative woronin body protein	7620	746.262
An15g06100		Ortholog of A. nidulans FGSC A4 : AN12198, A. fumigatus Af293 : Afu2g15810, Aspergillus wentii : Aspwe1_0026874 and Aspergillus sydowii : Aspsy1_0026968	5968	741.395
An01g00370	pepAb	Pepsin family secreted protease; only detected under starvation conditions	14360	740.658
An04g02250		Protein of unknown function; expression induced by tunicamycin and DTT	5957	730.086
An05g01750		Ortholog of A. fumigatus Af293 : Afu6g14040/och2, A. oryzae RIB40 : AO090003001503, Neosartorya fischeri NRRL 181 : NFIA_059930 and Aspergillus niger ATCC 1015 : 189528-mRNA	13998	728.46
An16g09040		Ortholog(s) have N-acetylglucosamine-6-phosphate deacetylase activity	15187	710.433
An01g12210		Ubiquinol-cytochrome c reductase	18462	707.175
An18g04790		Ortholog(s) have disulfide oxidoreductase activity, glutathione disulfide oxidoreductase activity, glutathione peroxidase activity, glutathione transferase activity	5739	706.078
An12g08570	prxII	Type 2 peroxiredoxin	8461	688.234
An01g10100		Has domain(s) with predicted catalytic activity, pyridoxal phosphate binding, transaminase activity	17896	678.172
An18g04840		Protein similar to elongation factor 1 alpha	16616	676.219
An18g01000		Protein of unknown function; expression repressed by tunicamycin and DTT	10338	673.588
An02g07920		Ortholog of Aspergillus tubingensis : Asptu1_0028992, Aspergillus brasiliensis : Aspbr1_0038395, Neosartorya fischeri NRRL 181 : NFIA_047710 and Aspergillus acidus : Aspfo1_0030390, Aspfo1_0030393	7965	666.569
An05g00540		Ortholog(s) have cell surface, cytosolic large ribosomal subunit localization	9055	664.589
An16g07290		F1F0-ATPase complex subunit	9541	649.494
An01g05370		Ortholog of A. nidulans FGSC A4 : AN0301, A. fumigatus Af293 : Afu1g02770, A. oryzae RIB40 : AO090005000817, Aspergillus wentii : Aspwe1_0169626 and Aspergillus sydowii : Aspsy1_0144698	12194	642.433
An18g06250	eno1	Phosphopyruvate hydratase	15637	626.003
An04g04390		Has domain(s) with predicted catalytic activity and role in metabolic process	6215	610.537
An16g05910		Protein similar to putative cytochrome P450; expression repressed by tunicamycin and DTT	15584	609.364
An11g05260		Ortholog(s) have role in syncytium formation by plasma membrane fusion, vacuolar proton-transporting V-type ATPase complex assembly and integral component of endoplasmic reticulum membrane localization	4834	608.811
An01g03460		Ortholog(s) have RNA binding, structural constituent of ribosome activity, role in cytoplasmic translation, macroautophagy and cytosolic large ribosomal subunit localization	9184	603.944
An02g07330		Ortholog of Aspergillus tubingensis : Asptu1_0028933, Aspergillus flavus NRRL 3357 : AFL2T_02306, Aspergillus kawachii : Aspka1_0179093 and Aspergillus carbonarius ITEM 5010 : Acar5010_203655	9514	595.589
An09g06590	sspB	Hsp90 chaperone	20595	595.589
An16g07080		Ortholog of A. nidulans FGSC A4 : AN1549, A. fumigatus Af293 : Afu8g05600, A. oryzae RIB40 : AO090005000583, Aspergillus wentii : Aspwe1_0187131 and Aspergillus sydowii : Aspsy1_0086712	3328	590.289
An13g02980		Ortholog of Neosartorya fischeri NRRL 181 : NFIA_002710, Aspergillus versicolor : Aspve1_0079646, Aspve1_0495831, Aspergillus niger ATCC 1015 : 191998-mRNA and Aspergillus zonatus : Aspzo1_0016273	5580	588.929
An02g08110		Ortholog(s) have glutathione peroxidase activity, phospholipid-hydroperoxide glutathione peroxidase activity, thioredoxin peroxidase activity	6001	585.014
An05g01290		Has domain(s) with predicted transmembrane transporter activity, role in transmembrane transport and integral component of membrane, membrane localization	15437	584.988
An08g03490	ef1	Elongation factor 1 beta	11821	580.178
An05g00140		Signal recognition particle (SRP) receptor beta subunit	9649	572.604
An04g03290		Long-chain-acyl-CoA dehydrogenase	17128	572.308
An01g13060		Ortholog of Aspergillus acidus : Aspfo1_0128974	6102	565.506
An12g04450		Ortholog of A. nidulans FGSC A4 : AN6116, A. fumigatus Af293 : Afu2g08820, A. oryzae RIB40 : AO090011000818, Aspergillus wentii : Aspwe1_0044988 and Aspergillus sydowii : Aspsy1_0045203	8802	560.916
An07g09430		Protein of unknown function	14431	555.436
An07g08960		Ortholog(s) have role in fungal-type cell wall organization and cell cortex of cell tip, membrane raft, plasma membrane localization	9186	554.926
An02g12140	gsdA	Glucose-6-phosphate dehydrogenase; expression induced by growth on xylose; induced by growth on starch and lactate	20367	550.128
An11g10490		Ortholog(s) have proteasome binding, protein binding, bridging, ubiquitin binding, ubiquitin conjugating enzyme activity, ubiquitin-protein transferase activity	6685	546.556
An12g07250		Has domain(s) with predicted hydrolase activity, acting on carbon-nitrogen (but not peptide) bonds activity	31636	545.521
An18g05980	rhoA	Ras GTPase	8027	545.267
An04g07430		Ortholog of A. nidulans FGSC A4 : AN5172, A. fumigatus Af293 : Afu4g09700, Afu6g07000, A. oryzae RIB40 : AO090012000946, AO090003001270 and Aspergillus wentii : Aspwe1_0166832	5626	544.302
An02g05830	mpdA	Mannitol 1-phosphate dehydrogenase (MPD); the first enzyme in the mannitol biosynthesis pathway; expression increased in sporulating mycelium suggesting mannitol biosynthesis may be developmentally regulated; expressed in vegetative hyphae	9912	542.344
An14g01990		Protein of unknown function; expression induced by tunicamycin and DTT	7630	539.536
An02g04260		Ortholog(s) have protein carrier activity, protein transporter activity and role in protein insertion into mitochondrial inner membrane	3114	538.86
An02g14500		Putative GPI-anchored cell wall protein; expression induced by tunicamycin and DTT; induced by caspofungin	5242	528.783
An08g03910		Ortholog(s) have role in ribosomal large subunit export from nucleus and cytosolic large ribosomal subunit localization	7181	528.262
An11g00890		Ortholog of A. oryzae RIB40 : AO090023000241, Neosartorya fischeri NRRL 181 : NFIA_056230, Aspergillus wentii : Aspwe1_0039389 and Aspergillus clavatus NRRL 1 : ACLA_084080	6017	523.441
An12g01280		Argininosuccinate synthase	10029	514.366
An18g06650		Putative heat shock protein	4658	511.047
An02g11300		Ortholog(s) have structural constituent of ribosome activity and mitochondrial large ribosomal subunit, mitochondrial ribosome localization	6344	506.991
An08g10990		Protein with similarity to dienelactone hydrolase	9276	505.811
An02g03950		Ortholog(s) have role in maintenance of translational fidelity, rRNA processing, ribosomal large subunit assembly and cell surface, cytosolic large ribosomal subunit, small-subunit processome localization	12297	500.131
An03g00790		Has domain(s) with predicted RNA binding, ribonuclease III activity and role in RNA processing	4008	496.941
An07g07780		Ortholog(s) have ATPase inhibitor activity, enzyme inhibitor activity, role in negative regulation of ATPase activity and mitochondrion localization	4590	495.08
An18g04310		Ortholog(s) have structural constituent of ribosome activity and cytosolic small ribosomal subunit localization	4846	494.303
An15g02000		Biotin synthase with a predicted role in biotin biosynthesis	9549	493.314
An08g07290	aldA	Aldehyde dehydrogenase involved in ethanol utilization; repressed by growth on starch and lactate	12793	488.27
An01g04740		Ortholog(s) have role in ribosomal large subunit assembly and cytosolic large ribosomal subunit localization	5673	486.229
An02g12270	grrbp2	Glycine-rich RNA-binding protein	4537	479.64
An04g00930		Ortholog of A. nidulans FGSC A4 : AN2913, AN4375, A. fumigatus Af293 : Afu3g07740, Afu4g06610, A. oryzae RIB40 : AO090023000927, AO090020000420 and Aspergillus wentii : Aspwe1_0041960, Aspwe1_0076983	7545	470.482
An11g10430		Ortholog(s) have condensed nuclear chromosome, nucleus localization	9473	469.995
An11g09500		Ortholog(s) have structural constituent of ribosome activity and cytosolic small ribosomal subunit, extracellular region localization	8402	467.739
An02g08020		Putative H+-transporting ATPase lipid-binding protein	6997	462.029
An01g12940		Ortholog of A. nidulans FGSC A4 : AN0823, A. fumigatus Af293 : Afu1g14830, A. oryzae RIB40 : AO090005001249, Aspergillus wentii : Aspwe1_0171783 and Aspergillus sydowii : Aspsy1_0053537	12673	455.382
An16g01350		Ortholog of A. nidulans FGSC A4 : AN7617, A. fumigatus Af293 : Afu4g00235, Neosartorya fischeri NRRL 181 : NFIA_045390, Aspergillus wentii : Aspwe1_0160305 and Aspergillus versicolor : Aspve1_0054503	3534	454.955
An02g01480		MFS multidrug transporter	13851	453.556
An07g06470		Protein of unknown function	9061	449.554
An12g07730		Has domain(s) with predicted copper ion transmembrane transporter activity, role in copper ion transmembrane transport and integral component of membrane localization	3653	449.434
An01g08800		Glutamine synthetase; induced by growth on starch and lactate	11330	448.24
An04g00410		Putative dipeptidyl peptidase III	15789	444.524
An14g04170		Cytochrome c oxidase subunit	2853	444.326
An12g01270		Has domain(s) with predicted ATP binding, alanine-tRNA ligase activity, nucleic acid binding, nucleotide binding activity, role in alanyl-tRNA aminoacylation and cytoplasm localization	6964	441.584
An18g02720		Ortholog(s) have glutathione peroxidase activity, glutathione transferase activity and intracellular localization	6428	441.344
An02g11960		Ortholog(s) have mitochondrion localization	6456	439.486
An12g10810		Ortholog(s) have extracellular region localization	3736	439.33
An14g03920		Ortholog(s) have structural constituent of ribosome activity and mitochondrial small ribosomal subunit localization	5545	437.12
An12g04870		Ortholog(s) have role in ribosomal large subunit assembly, translational termination and cell surface, cytosolic large ribosomal subunit localization	6410	432.207
An11g07875		Ortholog of A. nidulans FGSC A4 : AN7530, Aspergillus wentii : Aspwe1_0121053, Aspergillus sydowii : Aspsy1_0031999 and Aspergillus terreus NIH2624 : ATET_06692	4055	431.543
An08g05730		Ortholog(s) have 5S rRNA binding, structural constituent of ribosome activity, role in ribosomal large subunit assembly and cytosolic large ribosomal subunit localization	7813	431.19
An16g04930		Ortholog(s) have protein kinase activator activity, structural constituent of ribosome activity, role in cytoplasmic translation, positive regulation of protein kinase activity and cytosolic large ribosomal subunit, ribosome localization	2780	430.855
An02g08310		Has domain(s) with predicted oxidoreductase activity, transferase activity, transferring acyl groups other than amino-acyl groups, zinc ion binding activity and role in oxidation-reduction process	6937	421.858
An14g04710	pepA	Aspergillopepsin A, a pepsin family secreted acid protease; expression increases by growth without ammonia; under carbon control and pH regulation	8894	421.613
An17g00270		Protein similar to 26S ATP/ubiquitin-dependent proteinase chain S4	10433	420.835
An08g01490		Ortholog of S. cerevisiae : YCR051W, A. nidulans FGSC A4 : AN1295, A. fumigatus Af293 : Afu1g09700, Aspergillus wentii : Aspwe1_0168621 and Aspergillus sydowii : Aspsy1_0053072	5726	419.294
An01g02880	cep52	Cytoplasmic ubiquitin / ribosomal fusion protein	6178	419.22
An15g01700		Ortholog(s) have phosphatidic acid binding, phosphatidylinositol-3,5-bisphosphate binding, phosphatidylinositol-3-phosphate binding, phosphatidylinositol-4-phosphate binding, unfolded protein binding activity	5166	418.082
An11g04810	aox1	Mitochondria-localized alternative oxidase; functions in a cyanide- and antimycin A-insensitive and salicylhydroxamic acid-sensitive respiratory pathway; constitutively expressed regardless of the glucose concentration	7548	416.205
An17g01945		Ortholog(s) have role in actin filament organization, hyphal growth, mitotic actomyosin contractile ring assembly, small GTPase mediated signal transduction, syncytium formation by plasma membrane fusion	7969	415.725
An04g01430		Has domain(s) with predicted nucleic acid binding activity	5801	408.845
An17g00370		Ortholog(s) have single-stranded telomeric DNA binding activity	9403	407.613
An03g06140		Protein of unknown function	15094	407.011
An01g03130		Ortholog of A. fumigatus Af293 : Afu1g04300, A. oryzae RIB40 : AO090003000919, AO090701000446, Aspergillus wentii : Aspwe1_0025379 and Aspergillus terreus NIH2624 : ATET_06531	5964	406.427
An11g04620		Ortholog(s) have endopeptidase activity and role in proteasomal ubiquitin-independent protein catabolic process, proteasome-mediated ubiquitin-dependent protein catabolic process	6270	406.045
An02g01870		Ortholog(s) have role in lipid droplet disassembly	4080	405.797
An08g06940		Putative histone H4.1	3012	405.752
An16g00300		Has domain(s) with predicted methyltransferase activity and role in metabolic process	5770	402.66
An08g10030		Protein of unknown function; induced by growth on starch and lactate	2979	401.306
An15g06150		Ortholog of A. nidulans FGSC A4 : AN2166, A. fumigatus Af293 : Afu2g15850, A. oryzae RIB40 : AO090012000227, Aspergillus wentii : Aspwe1_0108220 and Aspergillus sydowii : Aspsy1_0140323	6030	401.079
An02g01830		Ortholog(s) have electron transfer activity and role in mitochondrial ATP synthesis coupled electron transport, mitochondrial electron transport, cytochrome c to oxygen, mitochondrial electron transport, ubiquinol to cytochrome c	6011	398.156
An01g12420		Ortholog(s) have structural constituent of ribosome activity and role in cellular response to drug, cleavage in ITS2 between 5.8S rRNA and LSU-rRNA of tricistronic rRNA transcript (SSU-rRNA, 5.8S rRNA, LSU-rRNA), cytoplasmic translation	7125	397.341
An02g10980		Ortholog(s) have intracellular localization	5225	392.973
An09g02700		Has domain(s) with predicted oxidoreductase activity, acting on the aldehyde or oxo group of donors, disulfide as acceptor activity and role in metabolic process	9546	391.487
An08g03420		Has domain(s) with predicted cytoplasm, nucleus localization	8500	390.752
An13g01800		Ortholog of A. fumigatus Af293 : Afu5g00590, A. niger CBS 513.88 : An15g07140 and Aspergillus wentii : Aspwe1_0039567, Aspwe1_0040764, Aspwe1_0044902	6266	388.829
An02g05390		Ortholog(s) have role in ascospore formation, ascospore-type prospore assembly, prospore membrane biogenesis and prospore membrane localization	8019	388.498
An09g06680	citA	Putative citrate synthase; predicted N-terminal mitochondrial import signal and a C-terminal peroxisomal target sequence (AKL)	10800	380.583
An12g09970		Protein of unknown function	8594	378.452
An18g03990		Has domain(s) with predicted role in transmembrane transport and integral component of membrane localization	9353	377.988
An04g02140		Ortholog(s) have pyruvate transmembrane transporter activity, role in mitochondrial pyruvate transmembrane transport and integral component of mitochondrial inner membrane localization	4901	377.498
An04g01870		Ortholog(s) have endopeptidase activator activity and role in proteasomal ubiquitin-independent protein catabolic process, proteasome-mediated ubiquitin-dependent protein catabolic process	4781	375.964
An15g00400		Ortholog of A. nidulans FGSC A4 : AN6524, A. fumigatus Af293 : Afu6g04930, A. oryzae RIB40 : AO090701000045, Aspergillus wentii : Aspwe1_0036161 and Aspergillus sydowii : Aspsy1_0037126	2975	375.423
An06g01360		Ortholog(s) have role in metal ion transport, protein targeting to vacuole, ubiquitin-dependent protein catabolic process and endoplasmic reticulum, fungal-type vacuole, fungal-type vacuole membrane localization	7400	375.31
An05g02110		Ortholog of A. fumigatus Af293 : Afu1g00550, Afu1g00910, A. niger CBS 513.88 : An13g03520, An12g06940, A. oryzae RIB40 : AO090120000200 and Aspergillus wentii : Aspwe1_0177887	10997	373.906
An02g04640		Ortholog(s) have mitochondrion localization	6716	372.58
An02g04060		Ortholog of A. nidulans FGSC A4 : AN10790, A. fumigatus Af293 : Afu2g12000, A. oryzae RIB40 : AO090026000447, Aspergillus sydowii : Aspsy1_0031545 and Aspergillus carbonarius ITEM 5010 : Acar5010_203382	2446	369.233
An10g00350		Ortholog(s) have intracellular localization	8798	368.382
An02g09200		Ortholog(s) have structural constituent of ribosome activity	5582	368.212
An09g03120		Protein of unknown function	7980	367.376
An07g05770		Protein of unknown function	1753	365.801
An16g04200	rho2	Putative GTP-binding protein; induced by caspofungin	5664	364.95
An02g07220		Protein of unknown function	3320	364.877
An17g02240		Ortholog(s) have RNA binding activity, role in ribosomal large subunit assembly and cytosolic large ribosomal subunit, preribosome, large subunit precursor localization	4991	364.22
An09g05940	sox	Sulphydryl oxidase	7673	361.852
An02g10320	nmt1	Ortholog(s) have thiamine pyrophosphate binding activity and role in hyphal growth, thiamine biosynthetic process	6975	361.801
An07g00680		Threonine aldolase	5878	355.426
An01g00780	xynB	Secreted endo-1,4-xylanase; glycoside hydrolase family 11; highly expressed on xylose; expression repressed by tunicamycin and DTT; XlnR regulated	4151	355.302
An16g02210		Ortholog(s) have role in proteasome-mediated ubiquitin-dependent protein catabolic process, ubiquitin-dependent protein catabolic process	4990	354.425
An11g09120		Ortholog(s) have RNA binding, structural constituent of ribosome activity, role in cytoplasmic translation and cytosolic large ribosomal subunit, yeast-form cell wall localization	4334	354.341
An05g01760		Has domain(s) with predicted transferase activity, transferring acyl groups other than amino-acyl groups activity	9070	353.356
An01g12240		Ortholog of A. nidulans FGSC A4 : AN2423, AN0736, A. fumigatus Af293 : Afu1g14230, Afu2g13800, A. niger CBS 513.88 : An02g05360 and A. oryzae RIB40 : AO090026000195	4634	351.839
An02g08030		Has domain(s) with predicted integral component of membrane localization	3578	348.805
An15g07620		Ortholog of Aspergillus tubingensis : Asptu1_0132098, Aspergillus brasiliensis : Aspbr1_0034734, Aspergillus kawachii : Aspka1_0182387 and Aspergillus acidus : Aspfo1_0135600	2563	345.266
An11g09970		Ortholog(s) have role in aerobic respiration, development of symbiont in host and mitochondrial intermembrane space localization	3858	345.023
An18g03730		Ortholog of A. nidulans FGSC A4 : AN5834, AN4190, A. fumigatus Af293 : Afu1g05790, Afu2g07800, A. niger CBS 513.88 : An05g00400 and A. oryzae RIB40 : AO090011000916, AO090009000346	4013	341.203
An05g00750		Ortholog(s) have cytosolic large ribosomal subunit localization	5028	341.185
An14g05320	wos2	Putative cell cycle regulator p21 protein	4852	339.711
An12g01330		Ortholog(s) have translation initiation factor activity and role in translational initiation	4591	337.732
An02g11360		Ortholog of A. nidulans FGSC A4 : AN2953, A. fumigatus Af293 : Afu3g07890, A. oryzae RIB40 : AO090005001486, Aspergillus wentii : Aspwe1_0041944 and Aspergillus sydowii : Aspsy1_0056308	5125	336.676
An01g07872		Protein of unknown function	1667	334.728
An18g04090		Has domain(s) with predicted heme binding, iron ion binding, oxygen binding activity and role in oxygen transport	4920	332.092
An07g06820		Has domain(s) with predicted oxidoreductase activity and role in metabolic process	6215	332.091
An02g01025		Protein of unknown function	686	331.844
An08g10060		Ortholog(s) have GTP binding, GTPase activity, Ran guanyl-nucleotide exchange factor activity	5498	331.194
An11g09880		Protein of unknown function; induced by growth on starch and lactate	5365	330.669
An14g07040		Has domain(s) with predicted DNA-binding transcription factor activity, RNA polymerase II-specific, zinc ion binding activity, role in regulation of transcription, DNA-templated and nucleus localization	7588	329.605
An04g01200		Ortholog(s) have ubiquinol-cytochrome-c reductase activity and role in aerobic respiration, mitochondrial electron transport, ubiquinol to cytochrome c, mitochondrial respiratory chain complex III assembly	4500	328.389
An11g00410		Ortholog(s) have intracellular localization	5913	327.179
An18g00740		Ortholog of A. nidulans FGSC A4 : AN5689, AN3244, AN1550, A. oryzae RIB40 : AO090038000176, Neosartorya fischeri NRRL 181 : NFIA_047350 and Aspergillus wentii : Aspwe1_0042514, Aspwe1_0046700, Aspwe1_0176395	10520	325.77
An07g02010	pre8	20S CP alpha subunit of the proteasome	5386	322.924
An04g01650		Ortholog(s) have structural constituent of ribosome activity and mitochondrial ribosome, mitochondrial small ribosomal subunit localization	4420	321.449
An08g06485		Protein of unknown function	1245	319.267
An16g02930	erg3	C-5 sterol desaturase	5081	316.835
An17g01420		Ortholog(s) have role in ER-dependent peroxisome organization, endoplasmic reticulum inheritance, endoplasmic reticulum organization and endoplasmic reticulum tubular network membrane organization, more	5585	314.758
An15g03320		Protein of unknown function	2233	314.756
An12g07900		Ortholog(s) have RNA strand annealing activity, double-stranded RNA binding, ribosomal small subunit binding, translation initiation factor activity, translation initiation factor binding activity	3385	309.662
An01g12850		Ortholog of A. nidulans FGSC A4 : AN0820, Neosartorya fischeri NRRL 181 : NFIA_010610, Aspergillus carbonarius ITEM 5010 : Acar5010_207906 and Aspergillus tubingensis : Asptu1_0189069	1018	309.537
An01g01150		Protein of unknown function	9770	308.988
An14g03820	gal10	UDP-glucose 4-epimerase; Leloir pathway enzyme	6461	307.419
An03g00640		Ortholog of A. fumigatus Af293 : Afu2g17790, Neosartorya fischeri NRRL 181 : NFIA_093190, Aspergillus niger ATCC 1015 : 194162-mRNA and Aspergillus zonatus : Aspzo1_0112721, Aspzo1_0127952, Aspzo1_0154500	8552	306.267
An07g02160	mdh1	Mitochondrial malate dehydrogenase	6254	306.242
An02g07190		Ortholog(s) have role in CENP-A containing chromatin organization, positive regulation of RNA polymerase II transcriptional preinitiation complex assembly and proteasome regulatory particle assembly, more	8096	304.63
An18g06680		Ortholog(s) have role in proteasomal ubiquitin-independent protein catabolic process, proteasome assembly, proteasome-mediated ubiquitin-dependent protein catabolic process	4320	304.467
An01g03580		Ortholog(s) have cell surface, cytosolic large ribosomal subunit localization	6453	302.752
An07g05510		Has domain(s) with predicted oxidoreductase activity and role in oxidation-reduction process	8776	302.743
An16g03430		Has domain(s) with predicted metal ion binding activity	5497	299.235
An02g10790	pre6	20S CP alpha subunit of the proteasome	5155	297.348
An04g08060		Protein of unknown function	3360	293.098
An04g02220		L-serine dehydratase	6099	291.717
An16g01820		Ortholog(s) have role in protein maturation, protein targeting to ER and endoplasmic reticulum, membrane, plasma membrane localization	4523	291.138
An07g04320		Ortholog(s) have L-arabinitol 2-dehydrogenase activity and role in D-arabinose catabolic process, D-arabitol catabolic process to xylulose 5-phosphate	4607	290.111
An04g04940		Ortholog of A. nidulans FGSC A4 : AN5580, A. fumigatus Af293 : Afu4g11550, Aspergillus wentii : Aspwe1_0022740, Aspergillus sydowii : Aspsy1_0057110 and Aspergillus terreus NIH2624 : ATET_03924	5305	287.557
An19g00210		Ortholog(s) have low-density lipoprotein particle binding activity, role in hemolysis by symbiont of host erythrocytes and intracellular localization	2240	284.357
An14g00950		Ortholog(s) have ferric-chelate reductase activity, role in copper ion import, iron ion transport and plasma membrane localization	7288	283.931
An08g01750		Ortholog of A. nidulans FGSC A4 : AN11936, A. fumigatus Af293 : Afu1g09940, A. oryzae RIB40 : AO090038000441, Neosartorya fischeri NRRL 181 : NFIA_015690 and Aspergillus clavatus NRRL 1 : ACLA_025570	6332	282.346
An16g05570		Aspartate transaminase; phenylalanine:alphaketoglutarate aminotransferase	6091	279.404
An08g05390		Ortholog(s) have double-stranded DNA binding, metallopeptidase activity, proteasome binding, single-stranded DNA binding, transition metal ion binding activity and role in DNA repair	4570	278.711
An12g00820	ugpA	Putative UTP-glucose-1-phosphate uridylyltransferase; Leloir pathway enzyme; induced by caspofungin	10458	278.357
An01g00160	hacA	Transcription factor involved in regulation of the unfolded protein response; activates transcription of several genes involved in the UPR; during secretion stress, altered transcription start site relieves translational regulation of hacA	4822	277.388
An05g01350		Ortholog of A. nidulans FGSC A4 : AN10327, A. oryzae RIB40 : AO090010000120, Aspergillus wentii : Aspwe1_0167953, Aspergillus niger ATCC 1015 : 39005-mRNA and Aspergillus zonatus : Aspzo1_0064042	5684	276.633
An18g06760		Putative isocitrate dehydrogenase (NAD+)	7001	276.461
An02g05210		Has domain(s) with predicted calcium ion binding, calcium-dependent phospholipid binding activity	6095	276.215
An01g08430		Ortholog(s) have mitochondrion localization	8324	271.736
An06g01870		Ortholog(s) have role in rRNA export from nucleus and cell surface localization	2975	270.99
An12g10210			4725	270.347
An04g10250		Has domain(s) with predicted N-acetyltransferase activity	4252	269.885
An01g01830	cpeB	Putative catalase-peroxidase	9652	269.25
An12g07840	gnaA	Putative glucosamine-6-phosphate N-acetyltransferase; induced by caspofungin	2535	267.994
An18g05000		Ortholog of A. nidulans FGSC A4 : AN10518, A. fumigatus Af293 : Afu1g06350, A. oryzae RIB40 : AO090001000412, Neosartorya fischeri NRRL 181 : NFIA_018360 and Aspergillus wentii : Aspwe1_0038230	2650	266.895
An07g03520		Protein of unknown function	3354	266.705
An01g06690		Ortholog(s) have low-affinity zinc ion transmembrane transporter activity, zinc ion transmembrane transporter activity	4386	265.209
An02g06230		Ortholog(s) have RNA polymerase II general transcription initiation factor activity and role in RNA polymerase II preinitiation complex assembly, transcription initiation from RNA polymerase II promoter	4322	261.339
An02g02960	acbp	Acyl-CoA-binding type 2 protein	2638	261.155
An02g07650	pgmB	Putative phosphoglucomutase; Leloir pathway enzyme; induced by caspofungin	7305	259.282
An07g04695		Protein of unknown function	747	256.443
An07g07670		Ortholog of A. nidulans FGSC A4 : AN4508/bxiA, A. fumigatus Af293 : Afu2g03220, A. oryzae RIB40 : AO090120000264, Aspergillus wentii : Aspwe1_0172263 and Aspergillus sydowii : Aspsy1_0213187	4276	256.132
An02g12390	mbfA	Ortholog(s) have transcription coactivator activity and role in pathogenesis, positive regulation of transcription by RNA polymerase II	2193	255.997
An02g04580		Has domain(s) with predicted hydrolase activity	3456	255.71
An02g06990		Protein of unknown function	512	253.434
An18g06700	pre7	20S CP beta subunit of the proteasome	3325	253.054
An05g00410		Glycine hydroxymethyltransferase/serine hydroxymethyltransferase	7385	251.497
An02g08685		Protein of unknown function	697	251.445
An12g05170		Ortholog of A. nidulans FGSC A4 : AN9208, AN9311, A. fumigatus Af293 : Afu5g14850, A. niger CBS 513.88 : An03g01320, An12g07240 and A. oryzae RIB40 : AO090023000071, AO090026000100	4269	251.004
An17g00390		Putative aminopeptidase	6246	250.678
An15g06740		Ortholog(s) have structural constituent of ribosome activity, role in translation and cytosolic large ribosomal subunit localization	4715	250.057
An12g07830		Ortholog(s) have RNA binding activity and cytosolic large ribosomal subunit localization	3619	248.746
An18g05230		Ortholog(s) have role in positive regulation of RNA polymerase II transcriptional preinitiation complex assembly, proteasome regulatory particle assembly, ubiquitin-dependent protein catabolic process	6006	248.222
An01g09460		Ortholog(s) have role in activation of MAPK activity involved in cell wall organization or biogenesis, asexual sporulation resulting in formation of a cellular spore and cellular response to drug, more	3657	248.153
An04g02210		Ortholog(s) have CAAX-protein geranylgeranyltransferase activity, protein farnesyltransferase activity, protein geranylgeranyltransferase activity and role in peptide pheromone maturation, protein farnesylation, protein geranylgeranylation	4460	247.425
An12g04460		Protein of unknown function	3652	247.288
An12g08590		Ortholog(s) have glyoxysome, mitochondrial membrane localization	3645	246.292
An08g08760		Ortholog(s) have guanyl-nucleotide exchange factor activity and role in mature ribosome assembly	4919	246.156
An09g06790	srgB	Rab GTPase	4040	244.057
An03g02360	hfbB	Putative hydrophobin	1903	243.513
An15g06080		Ortholog of A. nidulans FGSC A4 : AN2171, A. fumigatus Af293 : Afu2g15800, Aspergillus wentii : Aspwe1_0026865, Aspergillus sydowii : Aspsy1_0026967 and Aspergillus terreus NIH2624 : ATET_02458	2741	243.086
An10g00510		Ortholog(s) have S-(hydroxymethyl)glutathione dehydrogenase activity, alcohol dehydrogenase (NAD+) activity, hydroxymethylfurfural reductase (NADH) activity	5357	241.74
An03g06660		Putative peptide transporter	8022	240.937
An10g00320		Has domain(s) with predicted N-acetyltransferase activity	2790	240.42
An01g13590		Saccharopine dehydrogenase (NADP+, L-glutamate forming)	5223	240.105
An16g05940		Has domain(s) with predicted electron transfer activity, heme binding, iron ion binding, oxidoreductase activity, acting on paired donors, with incorporation or reduction of molecular oxygen activity and role in oxidation-reduction process	8356	239.264
An08g10010		Ortholog(s) have role in syncytium formation by plasma membrane fusion	2933	238.576
An01g03070		Ortholog(s) have structural constituent of ribosome activity and mitochondrial large ribosomal subunit, mitochondrion localization	1798	237.699
An11g11030		Ortholog(s) have RNA binding activity and cytosolic large ribosomal subunit, nucleus localization	2967	237.41
An04g05720		Putative ketothiolase; 3-ketoacyl-CoA thiolase	5113	236.41
An11g06150		Ortholog(s) have L-proline transmembrane transporter activity, role in proline transport and fungal-type vacuole, plasma membrane localization	6989	235.375
An08g08890		Ortholog of A. fumigatus Af293 : Afu8g01260, Neosartorya fischeri NRRL 181 : NFIA_094710, Aspergillus versicolor : Aspve1_0142475 and Aspergillus clavatus NRRL 1 : ACLA_012120	5242	234.891
An04g05220		Ubiquinol-cytochrome c reductase	3059	234.487
An11g10080		Has domain(s) with predicted role in cellular response to oxidative stress and endoplasmic reticulum membrane localization	3213	234.202
An09g03370		Protein of unknown function	3957	232.874
An13g01040		Putative Rab geranylgeranyltransferase; induced by caspofungin	4308	232.135
An08g00610		Ortholog(s) have structural constituent of ribosome activity, role in cytoplasmic translation and cytosolic large ribosomal subunit localization	4621	231.243
An14g02150		Carboxypeptidase Y family secreted protease	6190	231.142
An07g02960		Ortholog(s) have small ribosomal subunit rRNA binding, structural constituent of ribosome activity and role in maturation of SSU-rRNA from tricistronic rRNA transcript (SSU-rRNA, 5.8S rRNA, LSU-rRNA)	3920	231.122
An16g02000		Protein involved in shikimate metabolism	9404	230.953
An02g08300		Protein of unknown function; induced by growth on starch and lactate; expression repressed by tunicamycin and DTT	2057	230.837
An02g07760		Ortholog of A. nidulans FGSC A4 : AN2853, A. fumigatus Af293 : Afu3g11955, Aspergillus wentii : Aspwe1_0169180, Aspergillus sydowii : Aspsy1_0042758 and Aspergillus carbonarius ITEM 5010 : Acar5010_203700	3727	229.49
An16g04430		Ortholog(s) have enzyme activator activity, heme binding activity, role in ergosterol biosynthetic process, regulation of ergosterol biosynthetic process and endoplasmic reticulum, endosome localization	2699	229.481
An11g01260		Has domain(s) with predicted metal ion transmembrane transporter activity, role in metal ion transport, transmembrane transport and membrane localization	6690	228.438
An01g13600		Ortholog(s) have inorganic phosphate transmembrane transporter activity and role in phosphate ion transmembrane transport	4109	226.575
An18g00980		Similar to membrane protein Pth11 of Magnaporthe grisea; expression repressed by tunicamycin and DTT	3785	223.783
An09g05870	ndk1	Nucleoside-diphosphate kinase	3304	223.487
An09g00650		Protein of unknown function; expression induced by tunicamycin and DTT	2976	223.037
An12g09170		Protein of unknown function	1589	221.052
An11g09570		Protein similar to cytoplasmic ribosomal protein of the large subunit L37.b	1418	219.235
An10g00400	gelA	Putative 1,3-beta-glucanosyltransferase; predicted signal peptide secretion sequence; induced by caspofungin; expressed during germination	4968	219.229
An16g09020		Ortholog(s) have N-acetylglucosamine transmembrane transporter activity, role in N-acetylglucosamine transport and plasma membrane localization	5918	218.304
An15g06470		Putative signal sequence receptor alpha; expression enhanced by maltose; expression induced by tunicamycin and DTT	3108	215.713
An16g01610		Putative hydroxylase; expression repressed by tunicamycin and DTT	5190	215.194
An11g01670		Protein of unknown function	4877	214.177
An02g06820	pdcA	Pyruvate decarboxylase; protein levels influenced by presence of starch	6381	212.545
An11g06450		Ortholog of A. nidulans FGSC A4 : AN1088, A. fumigatus Af293 : Afu4g14470/tpcK, Afu8g00430, A. niger CBS 513.88 : An07g00070, An07g00010, An02g08300 and A. oryzae RIB40 : AO090001000323	1977	212.522
An15g06290		Ortholog(s) have 4 iron, 4 sulfur cluster binding, ATPase activity, iron ion binding activity, role in iron-sulfur cluster assembly, tRNA wobble uridine modification and Nbp35-Cfd1 ATPase complex, cytoplasm, nucleus localization	3631	211.544
An08g07620		Protein of unknown function	1034	210.941
An11g01640		Ortholog(s) have inositol phosphosphingolipid phospholipase activity, mannosyl-inositol phosphorylceramide phospholipase activity	4734	210.796
An07g10060		Putative proteinase B inhibitor	1564	210.689
An02g04160		Mitochondrial phosphate translocator	3876	208.33
An12g02850		Thioredoxin reductase	3484	208.301
An10g00170		Has domain(s) with predicted oxidoreductase activity and role in metabolic process	3433	208.175
An14g04160	cof1	Cofilin	2501	207.939
An01g09970		Ortholog of Aspergillus tubingensis : Asptu1_0199082, Aspergillus brasiliensis : Aspbr1_0039685, Aspergillus kawachii : Aspka1_0172284 and Aspergillus acidus : Aspfo1_0039401	6781	206.776
An12g07750		Ortholog(s) have fungal-type cell wall localization	2390	205.12
An11g03230	erg5	C-22 sterol desaturase	5882	205.014
An02g02820		Enoyl-CoA hydratase	3519	204.087
An01g06560		Argininosuccinate lyase	4845	203.935
An08g02260	pgkA	Phosphoglycerate kinase	4558	203.67
An02g09780		Ortholog(s) have role in conidium formation, negative regulation of conidium formation	5814	203.644
An12g10830		Protein of unknown function	3542	202.479
An01g04920		Ortholog(s) have structural constituent of ribosome activity, role in cytoplasmic translation and cytosolic large ribosomal subunit localization	2165	202.405
An14g02540		Ortholog(s) have role in cellular response to hypoxia, pathogenesis and nucleus localization	3175	200.529
An14g01420		Has domain(s) with predicted role in transmembrane transport and integral component of membrane localization	5953	200.485
An15g06930		Protein of unknown function	2782	200.045
An15g07230		Has domain(s) with predicted role in cell redox homeostasis	2529	197.656
An14g00270		Putative dolichyl-phosphate mannosyltransferase; expression enhanced by maltose	1475	196.626
An04g07050		Ortholog(s) have heat shock protein binding activity, role in protein folding and cytoplasm, nucleus localization	4699	196.366
An01g02500		Thioredoxin	1389	193.651
An01g08440		Ortholog of A. nidulans FGSC A4 : AN3590, AN7906, A. fumigatus Af293 : Afu4g12880, A. oryzae RIB40 : AO090009000315 and Aspergillus wentii : Aspwe1_0033843	2655	192.868
An16g07150		Succinate dehydrogenase	6554	192.5
An02g12120		Ortholog(s) have structural constituent of ribosome activity, role in cytoplasmic translation and cytosolic large ribosomal subunit localization	2605	191.413
An08g06160		Ortholog(s) have farnesyltranstransferase activity and role in terpenoid biosynthetic process	3699	191.095
An14g04920	tpiA	Triose-phosphate-isomerase	3422	190.337
An12g06540		Ortholog of A. nidulans FGSC A4 : AN5376, A. fumigatus Af293 : Afu6g13900, A. niger CBS 513.88 : An08g08300, A. oryzae RIB40 : AO090103000390, AO090038000051 and Aspergillus wentii : Aspwe1_0101779	5514	189.396
An01g12810		Ortholog(s) have endoplasmic reticulum, plasma membrane localization	2689	189.307
An18g04070		Ortholog of A. nidulans FGSC A4 : AN4049, A. fumigatus Af293 : Afu1g03630, Afu5g10010, A. oryzae RIB40 : AO090003000982, Aspergillus wentii : Aspwe1_0169327 and Aspergillus sydowii : Aspsy1_0150461	2222	189.176
An08g02470		Ortholog(s) have role in maturation of LSU-rRNA from tricistronic rRNA transcript (SSU-rRNA, 5.8S rRNA, LSU-rRNA) and cytosolic large ribosomal subunit, preribosome, large subunit precursor localization	2745	189.08
An02g10750		Cysteine synthase	3459	187.177
An18g03940		Ortholog of A. nidulans FGSC A4 : AN10496, A. fumigatus Af293 : Afu1g03790, A. oryzae RIB40 : AO090003000968, Neosartorya fischeri NRRL 181 : NFIA_020880 and Aspergillus versicolor : Aspve1_0030612	4867	183.89
An04g00060		NADH-ubiquinone oxidoreductase; respiratory-chain NADH dehydrogenase	2455	183.131
An01g06350		Has domain(s) with predicted transferase activity, transferring hexosyl groups activity, role in carbohydrate metabolic process and membrane localization	3720	182.438
An12g07790		Ortholog(s) have polysomal ribosome localization	2708	182.016
An07g03100		Ortholog(s) have S-formylglutathione hydrolase activity, role in formaldehyde catabolic process and cytosol localization	3365	181.782
An07g07690		Has domain(s) with predicted RNA binding, nucleic acid binding, nucleotide binding activity, role in RNA processing and cytoplasm, nucleus localization	1734	180.623
An15g06420		Ortholog(s) have role in urea metabolic process	3028	180.53
An01g04280		Ortholog(s) have ATPase activator activity, unfolded protein binding activity	4085	180.139
An05g02080		Ortholog of Aspergillus tubingensis : Asptu1_0159144, Aspergillus brasiliensis : Aspbr1_0189004, Aspergillus kawachii : Aspka1_0179273 and Aspergillus acidus : Aspfo1_0053091	3824	179.673
An11g10150		Phosphoribosyl amino imidazolesuccinocarbozamide synthetase	2932	179.672
An02g11320		Ortholog(s) have UDP-N-acetylglucosamine 4-epimerase activity, UDP-glucose 4-epimerase activity and role in galactose metabolic process	3614	179.305
An18g05680		Ortholog(s) have role in iron-sulfur cluster assembly, lipoate biosynthetic process, long-chain fatty acid biosynthetic process, mitochondrial respiratory chain complex I assembly	2431	179.247
An06g00160		Ortholog(s) have extracellular region localization	1737	179.182
An02g03590	gal7	UTP-hexose-1-phosphate uridylyltransferase (UDP-galactose pyrophosphorylase); Leloir pathway enzyme	3775	178.421
An16g07950		Ortholog of A. nidulans FGSC A4 : AN6754, AN1490, A. fumigatus Af293 : Afu7g00450, Afu8g04860, A. niger CBS 513.88 : An02g00120, An14g06960 and A. oryzae RIB40 : AO090102000310	2304	178.325
An01g10360		Ortholog(s) have role in cellular response to drug	5250	177.653
An11g03170		Ortholog of A. nidulans FGSC A4 : AN1873, A. fumigatus Af293 : Afu2g04460, A. oryzae RIB40 : AO090003000241, Aspergillus wentii : Aspwe1_0046130 and Aspergillus sydowii : Aspsy1_0026293	2839	177.551
An07g03290		Enoyl-ACP reductase	3211	177.364
An15g00870		Ortholog(s) have calcium ion binding, calcium-dependent protein serine/threonine phosphatase activity, calcium-dependent protein serine/threonine phosphatase regulator activity	2371	177.072
An14g07060		Ortholog(s) have extracellular region, intracellular localization	2200	176.258
An17g01710		Putative multidrug transporter	4940	176.221
An11g00420		Ortholog(s) have phosphoprotein phosphatase activity, protein serine/threonine phosphatase activity	3808	175.943
An02g08670	ugtA	Putative UDP-galactofuranose transporter involved in import of UDP-galactofuranose into the Golgi lumen	4105	175.213
An02g12150		Ortholog of Aspergillus acidus : Aspfo1_0078633	1701	174.062
An07g03680		Ortholog of A. nidulans FGSC A4 : AN1133, A. fumigatus Af293 : Afu5g09310, A. oryzae RIB40 : AO090020000537, Aspergillus wentii : Aspwe1_0099581 and Aspergillus sydowii : Aspsy1_0059490	2616	173.279
An18g03210		Has domain(s) with predicted oxidoreductase activity, zinc ion binding activity and role in oxidation-reduction process	3396	172.924
An02g05640		Ortholog of A. nidulans FGSC A4 : AN6335, A. fumigatus Af293 : Afu2g13580, Aspergillus wentii : Aspwe1_0045453, Aspergillus sydowii : Aspsy1_0089786 and Aspergillus terreus NIH2624 : ATET_01338	2671	172.799
An12g00790	sti1	Stress-induced protein	6436	172.094
An11g01180		Ortholog of A. nidulans FGSC A4 : AN7192, A. fumigatus Af293 : Afu6g10280, A. oryzae RIB40 : AO090023000278, Aspergillus wentii : Aspwe1_0176873 and Aspergillus sydowii : Aspsy1_0075173	3074	171.129
An05g02280		Ortholog(s) have extracellular region localization	3149	170.258
An07g10420		Ortholog(s) have aminophospholipid flippase activity and role in actin cortical patch localization, endocytosis, intracellular protein transport, phospholipid translocation, retrograde transport, endosome to Golgi	3942	169.845
An01g10050	IgE-HRF	IgE-dependent histamine-releasing factor	2359	169.82
An02g14590		NAD+-dependent glutamate dehydrogenase	9244	169.372
An07g09550		Ortholog(s) have structural constituent of ribosome activity and mitochondrial membrane, mitochondrial ribosome, mitochondrial small ribosomal subunit localization	4128	169.291
An01g05350		Ortholog(s) have RNA binding activity, role in mRNA polyadenylation, pre-mRNA cleavage required for polyadenylation, response to drug and cytosol, mRNA cleavage and polyadenylation specificity factor complex, nucleus localization	2451	169.194
An06g01260		Ortholog of A. nidulans FGSC A4 : AN0600, A. fumigatus Af293 : Afu6g10940, A. oryzae RIB40 : AO090023000524, Aspergillus wentii : Aspwe1_0107964 and Aspergillus sydowii : Aspsy1_0041257	2463	169.109
An11g02230	erg11	Cytochrome p450 lanosterol 14A-demethylase	4226	169.075
An16g04420		Ortholog(s) have role in reciprocal meiotic recombination and mitochondrion, nuclear envelope, plasma membrane localization	4810	168.848
An16g05960		Ortholog of A. nidulans FGSC A4 : AN7404, A. fumigatus Af293 : Afu3g01280, A. niger CBS 513.88 : An02g12500, An09g03800 and A. oryzae RIB40 : AO090011000171	3354	168.368
An08g00540		Ortholog of A. nidulans FGSC A4 : AN1378, A. fumigatus Af293 : Afu1g09030, A. oryzae RIB40 : AO090005001622, Aspergillus wentii : Aspwe1_0024518 and Aspergillus sydowii : Aspsy1_0138364	3486	168.122
An07g07170		Ortholog of S. cerevisiae : MOH1, A. nidulans FGSC A4 : AN4539, A. fumigatus Af293 : Afu2g02820, A. oryzae RIB40 : AO090026000627 and Aspergillus wentii : Aspwe1_0168864	1053	168.094
An03g06730		Ortholog of A. nidulans FGSC A4 : AN10344, A. fumigatus Af293 : Afu8g02620, A. oryzae RIB40 : AO090010000752, Neosartorya fischeri NRRL 181 : NFIA_096330 and Aspergillus wentii : Aspwe1_0033226	5402	166.716
An16g07410		F1F0-ATPase complex subunit	5493	166.705
An04g07070		Ortholog(s) have nicotinamide riboside transmembrane transporter activity, nucleobase transmembrane transporter activity, nucleoside transmembrane transporter activity	3636	165.718
An08g07230		Ortholog(s) have transcription coregulator activity	2807	165.5
An03g02980		Putative thioredoxin	989	165.317
An14g06380		Protein of unknown function	4308	165.213
An01g09020		Has domain(s) with predicted hydrolase activity	2989	164.959
An02g03110		Ortholog(s) have structural constituent of ribosome activity and mitochondrial large ribosomal subunit, mitochondrial ribosome localization	3486	164.397
An01g08850		Ortholog(s) have G-protein alpha-subunit binding, GDP-dissociation inhibitor activity, protein kinase C binding, ribosome binding activity	4093	164.166
An15g01490		Ortholog of A. nidulans FGSC A4 : AN6613, A. fumigatus Af293 : Afu6g04265, A. oryzae RIB40 : AO090701000146, Aspergillus wentii : Aspwe1_0322074 and Aspergillus sydowii : Aspsy1_0164382	1933	163.916
An02g05490		Ca2+/calmodulin-dependent protein kinase	4605	162.906
An01g02900		Ortholog(s) have RNA binding, ribosome binding, translation elongation factor activity, translation initiation factor activity	2127	162.849
An04g03180		Ortholog of A. nidulans FGSC A4 : AN1719, A. fumigatus Af293 : Afu4g08370, A. oryzae RIB40 : AO090701000366, Aspergillus wentii : Aspwe1_0102057, Aspwe1_0436878 and Aspergillus sydowii : Aspsy1_0074793	2923	162.723
An11g01630	nmt2	Thiazole biosynthesis protein	2674	161.079
An07g09005		Ortholog of S. cerevisiae : YIL156W-B, A. nidulans FGSC A4 : AN10651, Aspergillus wentii : Aspwe1_0051611, Aspergillus versicolor : Aspve1_0055935 and Aspergillus niger ATCC 1015 : 209366-mRNA	1368	160.868
An02g06390		Ortholog(s) have role in ribosome biogenesis and cell surface, small-subunit processome localization	2787	160.035
An08g00950		Ortholog(s) have structural constituent of ribosome activity and mitochondrial large ribosomal subunit, mitochondrial ribosome localization	1705	159.868
An07g05920	cypD	Estrogen receptor-binding cyclophilin	3623	159.766
An16g08740		Ortholog(s) have mitochondrion localization	1872	159.378
An18g05860		Ortholog(s) have protein kinase activator activity, structural constituent of ribosome activity, role in cytoplasmic translation, positive regulation of protein kinase activity and cytosolic large ribosomal subunit, ribosome localization	1884	158.289
An16g06350		Stearoyl-CoA 12-desaturase	4130	157.536
An02g12850		Protein of unknown function	6290	156.951
An01g00340		Has domain(s) with predicted transmembrane transporter activity, role in transmembrane transport and integral component of membrane localization	3199	155.929
An14g00850	fpr1	Peptidyl-prolyl isomerase	1566	155.755
An04g06670		Ortholog(s) have mRNA binding activity and role in mRNA splicing, via spliceosome	1430	155.026
An02g06150		Branched chain amino acid aminotransferase	3312	154.932
An16g07910		Has domain(s) with predicted phosphatidylinositol binding activity and role in cell communication	3102	154.866
An02g13220	lplB	Putative lysophospholipase phospholipase B; induced by caspofungin	4788	154.253
An01g09220	melC2	Putative monophenol monooxigenase; tyrosinase; expression repressed by tunicamycin and DTT	3221	154.061
An12g09190		Has domain(s) with predicted nucleic acid binding activity	3125	153.967
An01g01530		Proline dehydrogenase	3618	153.809
An13g01110		Ortholog(s) have role in cellular response to freezing and fungal-type vacuole localization	2161	153.661
An01g00560		Putative signal peptidase complex subunit; expression enhanced by maltose; expression induced by tunicamycin and DTT	1236	153.546
An04g06570		Ortholog(s) have histidine phosphotransfer kinase activity, transferase activity, transferring phosphorus-containing groups activity and role in osmosensory signaling via phosphorelay pathway, response to osmotic stress	1432	153.42
An07g04900		Ortholog of A. nidulans FGSC A4 : AN10581, A. fumigatus Af293 : Afu5g08640, Neosartorya fischeri NRRL 181 : NFIA_078640 and Aspergillus versicolor : Aspve1_0042746	1797	153.197
An12g10350		Ortholog of A. niger CBS 513.88 : An15g07090, Neosartorya fischeri NRRL 181 : NFIA_091810, Aspergillus wentii : Aspwe1_0171052 and Aspergillus versicolor : Aspve1_0080842	883	152.798
An11g07490		Protein of unknown function	3689	151.971
An15g04510		Ortholog of A. nidulans FGSC A4 : AN1559, A. fumigatus Af293 : Afu8g05670, A. oryzae RIB40 : AO090005000575, Aspergillus wentii : Aspwe1_0141349 and Aspergillus sydowii : Aspsy1_0146079	2172	151.408
An18g05180		Has domain(s) with predicted role in GPI anchor biosynthetic process	3227	151.288
An11g10610		Has domain(s) with predicted transferase activity, transferring glycosyl groups activity	2620	150.581
An15g02880		Ortholog of A. nidulans FGSC A4 : AN5372, AN7785, A. fumigatus Af293 : Afu5g07450, Afu6g14060, A. niger CBS 513.88 : An08g08280, An12g10360 and A. oryzae RIB40 : AO090103000388, AO090701000652, AO090010000610	2946	150.49
An17g02340		Has domain(s) with predicted ATP binding, aminoacyl-tRNA ligase activity, serine-tRNA ligase activity, role in seryl-tRNA aminoacylation, tRNA aminoacylation for protein translation and cytoplasm localization	4267	150.449
An12g04780		NADH-ubiquinone oxidoreductase; respiratory-chain NADH dehydrogenase	2387	150.166
An01g03490		Ortholog of A. nidulans FGSC A4 : AN0442, A. fumigatus Af293 : Afu1g04610, A. oryzae RIB40 : AO090003000887, Aspergillus wentii : Aspwe1_0025410 and Aspergillus sydowii : Aspsy1_0145574	2381	149.788
An11g10200		Protein with similarity to subunit VIa of cytochrome c oxidase	1675	149.378
An07g05800		Putative signal recognition particle subunit; expression enhanced by maltose	1064	148.991
An14g03300		Protein of unknown function	3220	148.883
An08g10110		Putative lipid transfer protein; induced by caspofungin	1223	148.465
An03g06420		Has domain(s) with predicted N-acetyltransferase activity	2064	148.416
An12g03760		Ortholog of A. niger CBS 513.88 : An12g03780, An12g03770, Aspergillus wentii : Aspwe1_0168652 and Aspergillus niger ATCC 1015 : 54032-mRNA, 54033-mRNA, 54034-mRNA	4258	148.329
An09g05970		Ortholog(s) have methionyl glutamyl tRNA synthetase complex localization	5094	148.119
An01g07350		Ortholog(s) have ubiquitin conjugating enzyme activity, ubiquitin-protein transferase activity and role in free ubiquitin chain polymerization, postreplication repair, protein K63-linked ubiquitination, protein polyubiquitination	1566	147.702
An02g06130		Ortholog(s) have mRNA binding, small ribosomal subunit rRNA binding activity and role in maturation of SSU-rRNA from tricistronic rRNA transcript (SSU-rRNA, 5.8S rRNA, LSU-rRNA), ribosomal small subunit assembly	1712	146.146
An15g03020		Ortholog(s) have K48-linked polyubiquitin modification-dependent protein binding activity and role in proteasome assembly, ubiquitin-dependent protein catabolic process	2346	145.155
An14g00880		Ortholog(s) have role in protein targeting to mitochondrion and mitochondrial outer membrane, peroxisomal membrane localization	2955	144.698
An13g00180		Protein of unknown function	1332	144.157
An01g14160		Ortholog(s) have magnesium-dependent protein serine/threonine phosphatase activity, protein serine/threonine phosphatase activity	3808	143.963
An15g06110		Ortholog(s) have role in Golgi to vacuole transport, vacuole fusion and Golgi trans cisterna, late endosome localization	1764	143.854
An11g05680		Has domain(s) with predicted electron transfer activity, heme binding, iron ion binding, oxidoreductase activity, acting on paired donors, with incorporation or reduction of molecular oxygen activity and role in oxidation-reduction process	3881	143.744
An14g03410		Ortholog of A. nidulans FGSC A4 : AN6527, AN5581, A. fumigatus Af293 : Afu6g04900, Afu4g11477, A. niger CBS 513.88 : An04g05110 and A. oryzae RIB40 : AO090701000049, AO090003001075	2526	143.118
An18g05430		Ortholog(s) have role in ATP export, ESCRT III complex assembly, cellular response to anoxia, cellular response to drug, cellular response to lithium ion, cellular response to pH and filamentous growth, more	1916	142.757
An15g03400		Protein of unknown function	899	141.739
An15g01280		Putative peroxisomal delta3,delta2-enoyl-CoA isomerase	1997	141.684
An03g02430		Ortholog(s) have mannitol 2-dehydrogenase activity, mannitol dehydrogenase activity and extracellular region localization	3342	141.511
An14g00280		Hypoxanthine phosphoribosyltransferase with a role in the salvage pathways for nucleotides	2309	141.359
An11g09510		Aspartic beta semi-aldehyde dehydrogenase, aspartate semialdehyde dehydrogenase	2633	139.872
An09g03950		Has domain(s) with predicted ATP binding, aminoacyl-tRNA ligase activity, tryptophan-tRNA ligase activity, role in tRNA aminoacylation for protein translation, tryptophanyl-tRNA aminoacylation and cytoplasm localization	3263	139.835
An02g07320		Enoyl-CoA hydratase	2132	139.483
An02g03310		Ortholog(s) have role in intracellular sterol transport and extracellular region, fungal-type vacuole lumen localization	1409	138.842
An07g10110		Ortholog(s) have role in cellular response to drug and intracellular, mitotic spindle midzone, proteasome regulatory particle, lid subcomplex, proteasome storage granule localization	2643	138.559
An11g11280		Dihydrolipoamide S-succinyl transferase	4450	138.339
An14g02090		Ortholog of Aspergillus wentii : Aspwe1_0739269, Aspergillus versicolor : Aspve1_0088438, Aspergillus sydowii : Aspsy1_0071565 and Aspergillus brasiliensis : Aspbr1_0220682	1407	138.218
An14g00970		Has domain(s) with predicted role in transmembrane transport and integral component of membrane localization	4483	137.755
An06g01660		Ortholog(s) have unfolded protein binding activity and mitochondrion localization	1828	137.161
An18g05970		Protein of unknown function	2631	136.252
An13g00550		Ortholog(s) have 3-deoxy-7-phosphoheptulonate synthase activity and role in aromatic amino acid family biosynthetic process	2839	135.384
An01g01990		Ortholog of Aspergillus brasiliensis : Aspbr1_0205234	619	135.36
An11g07880		Protein of unknown function	5140	135.231
An07g08140		Has domain(s) with predicted ATP binding, aminoacyl-tRNA ligase activity, tRNA binding activity, role in tRNA aminoacylation and cytoplasm localization	2081	135.04
An09g06200		Ortholog of A. nidulans FGSC A4 : AN6413, AN6419, AN6946, AN5312, AN5664, AN8328, AN3241, AN10369, AN1930, AN2386, AN1738, AN11159, AN8984, AN8951, AN1540, AN8971, AN9387, AN9266, AN9306, AN1317, AN10886, AN7232, AN7774, AN12202	2954	135.02
An07g03030		Ortholog of A. nidulans FGSC A4 : AN8781, Neosartorya fischeri NRRL 181 : NFIA_026420, Aspergillus wentii : Aspwe1_0285981 and Aspergillus versicolor : Aspve1_0141259	766	134.743
An05g01280		Protein of unknown function	1839	134.663
An03g00400		Putative heat shock protein	2122	134.422
An11g06690		Ortholog of A. nidulans FGSC A4 : AN1754, AN8607, A. fumigatus Af293 : Afu3g02050, A. niger CBS 513.88 : An18g01930 and A. oryzae RIB40 : AO090001000144	1047	134.246
An08g03680		Ortholog(s) have extracellular region localization	4417	134.241
An18g06130		Ortholog of A. nidulans FGSC A4 : AN5753, A. fumigatus Af293 : Afu6g06840, A. oryzae RIB40 : AO090020000272, Aspergillus wentii : Aspwe1_0050172 and Aspergillus sydowii : Aspsy1_0043673	888	133.731
An14g02710		Protein of unknown function	923	133.643
An07g07580		Ortholog of A. nidulans FGSC A4 : AN4512, A. fumigatus Af293 : Afu2g03155, A. oryzae RIB40 : AO090120000271, Aspergillus wentii : Aspwe1_0155259 and Aspergillus sydowii : Aspsy1_0036813	1047	133.442
An12g01020		Putative amidase/acetamidase	4073	133.099
An16g09070		Putative glucosamine-6-phosphate deaminase; expression induced by tunicamycin and DTT	2734	132.959
An02g07400		Ortholog(s) have DNA binding, DNA binding, bending activity	976	132.88
An02g12100		Protein of unknown function	876	132.864
An02g10620		Ortholog of A. oryzae RIB40 : AO090020000501, Aspergillus wentii : Aspwe1_0045752, Aspwe1_0188231, Aspergillus clavatus NRRL 1 : ACLA_055960, ACLA_078760 and Aspergillus niger ATCC 1015 : 37333-mRNA	5416	132.858
An08g04470		Ortholog(s) have GTPase activity, translation elongation factor activity, role in mitochondrial translation, mitochondrial translational elongation and intracellular, mitochondrion localization	3295	132.575
An02g08930		Has domain(s) with predicted double-stranded RNA binding activity	1237	132.306
An18g06270	artA	14-3-3 protein	2952	132.185
An09g04300		Ortholog(s) have calmodulin binding, cytoskeletal protein binding, lipid binding activity	2772	132.091
An11g10960		Ortholog of A. nidulans FGSC A4 : AN10411, A. fumigatus Af293 : Afu3g05670, A. oryzae RIB40 : AO090020000037, Neosartorya fischeri NRRL 181 : NFIA_071520 and Aspergillus wentii : Aspwe1_0173697	1996	132.074
An02g01022		Protein of unknown function	490	132.018
An02g02920		Triosephosphate isomerase	1748	131.467
An17g01000		Ortholog(s) have anion channel activity, anion transmembrane transporter activity, role in anion transport and plasma membrane localization	3593	131.25
An12g04800		Adenosine deaminase	2206	131.155
An17g00550		Putative NAD-dependant epimerase/dehydratase; repressed by growth on starch and lactate	2389	131.053
An02g07470	fba1	Fructose-bisphosphate aldolase; repressed by growth on starch and lactose	2632	130.89
An12g00320		Adenine phosphoribosyltransferase with a predicted role in adenine salvage pathway	1499	130.404
An01g03290			539	130.367
An02g12010	ipp1	Inorganic pyrophosphatase	2288	130.095
An02g01615		Ortholog of Aspergillus tubingensis : Asptu1_0115764 and Aspergillus acidus : Aspfo1_0227167	452	130.008
An01g06480		Ortholog(s) have unfolded protein binding activity, role in protein folding and chaperonin-containing T-complex localization	3672	129.9
An07g07840		Ortholog(s) have cytosol, cytosolic large ribosomal subunit, hyphal cell wall, nucleus localization	2324	129.377
An15g04100		Has domain(s) with predicted oxidoreductase activity, oxidoreductase activity, acting on the aldehyde or oxo group of donors, NAD or NADP as acceptor activity and role in oxidation-reduction process	3301	129.154
An06g01030		Protein of unknown function	5558	129.147
An01g11340		Has domain(s) with predicted aminopeptidase activity, metalloexopeptidase activity and role in cellular process, proteolysis	2781	129.146
An13g02230		Protein of unknown function	667	129.061
An12g03780		Has domain(s) with predicted cytoskeletal regulatory protein binding activity and role in regulation of actin nucleation	4729	128.824
An01g00290		Ortholog of A. oryzae RIB40 : AO090124000045, Aspergillus wentii : Aspwe1_0072249, Aspwe1_0103026, Aspwe1_0177402 and Aspergillus versicolor : Aspve1_0025846, Aspve1_0086138	4329	128.808
An03g01310		CTP synthase	3830	128.58
An07g07270		Ortholog(s) have tRNA 2-phosphotransferase activity, role in tRNA splicing, via endonucleolytic cleavage and ligation and cytoplasm, nucleus localization	2072	128.576
An12g07550		Protein of unknown function	2700	128.277
An11g09390		NADH-ubiquinone oxidoreductase; respiratory-chain NADH dehydrogenase	1571	127.463
An12g07740		Has domain(s) with predicted oxidoreductase activity	2818	126.718
An04g08980		Ortholog(s) have cytosolic large ribosomal subunit localization	1268	126.708
An01g02870		Has domain(s) with predicted membrane localization	2393	125.453
An09g03010		Has domain(s) with predicted role in cell wall macromolecule catabolic process	1243	125.387
An07g06740		Ortholog(s) have nuclear periphery, nuclear pore, spindle pole body localization	2108	125.329
An17g01955		Has domain(s) with predicted aminoacyl-tRNA hydrolase activity	2228	125.014
An15g02200	aod1	Alcohol oxidase; induced by growth on starch and lactate	3776	124.284
An02g03450		Ortholog of A. nidulans FGSC A4 : AN10752, A. fumigatus Af293 : Afu2g11470, Neosartorya fischeri NRRL 181 : NFIA_086710, Aspergillus wentii : Aspwe1_0044288 and Aspergillus versicolor : Aspve1_0040617	2753	123.708
An15g07040		Phospholipase D	7490	123.582
An13g02990		Ortholog of Aspergillus tubingensis : Asptu1_0182467, Aspergillus brasiliensis : Aspbr1_0037835, Aspergillus kawachii : Aspka1_0182176 and Aspergillus acidus : Aspfo1_0142680	3259	123.574
An02e09410	tK(UUU)1	tRNA-Lys, predicted by tRNAscan-SE; UUU anticodon	141	123.333
An18g03440		Protein of unknown function	1030	123.163
An18g06260		Has domain(s) with predicted translation initiation factor activity and eukaryotic translation initiation factor 3 complex localization	2027	123.15
An16g02990		Phosphoglycerate mutase	3372	123.036
An18g05020		Ortholog(s) have cytosolic large ribosomal subunit, small-subunit processome localization	1526	122.876
An08g00490		Ortholog of Aspergillus niger ATCC 1015 : 177169-mRNA and Aspergillus terreus NIH2624 : ATET_08528	2331	122.706
An01g03770		Dynein light chain; induced by caspofungin	1120	122.249
An06g00990		Putative fumarate reductase	2784	122.177
An02g11190		Ortholog of A. nidulans FGSC A4 : AN8050, A. fumigatus Af293 : Afu5g02090, A. oryzae RIB40 : AO090003001312, Neosartorya fischeri NRRL 181 : NFIA_040030 and Aspergillus wentii : Aspwe1_0061053	965	122.017
An05g00050		Ortholog(s) have dipeptidase activity	2938	121.425
An14g01430		Ortholog of A. nidulans FGSC A4 : AN7139, A. fumigatus Af293 : Afu4g03730, A. oryzae RIB40 : AO090011000309, Aspergillus wentii : Aspwe1_0030342 and Aspergillus sydowii : Aspsy1_0034590	2855	120.49
An04g04990		Mannose-1-phosphate guanylyltransferase	2578	120.332
An14g00640		Ortholog of A. nidulans FGSC A4 : AN7033, A. fumigatus Af293 : Afu4g04190, A. oryzae RIB40 : AO090206000078, Aspergillus wentii : Aspwe1_0174608 and Aspergillus sydowii : Aspsy1_0427823	2114	119.881
An03g04580		Has domain(s) with predicted nucleic acid binding, nucleotide binding activity	3093	119.769
An05g01770		Protein of unknown function; expression repressed by tunicamycin and DTT	2454	118.98
An02g02030		Ortholog(s) have hercynylcysteine sulfoxide lyase activity (ergothioneine-forming), hercynylselenocysteine lyase activity (selenoneine-forming) activity and role in ergothioneine biosynthetic process, selenoneine biosynthetic process	2740	118.535
An07g08990	pkiA	Pyruvate kinase	3808	118.496
An13g01210		Ortholog(s) have endopeptidase activity and role in proteasomal ubiquitin-independent protein catabolic process, proteasome-mediated ubiquitin-dependent protein catabolic process	1220	118.211
An09g04280		Ortholog(s) have cysteine desulfurase activity	3294	118.032
An09g00630	cipC	Ortholog of A. nidulans FGSC A4 : AN7937/cipC, A. oryzae RIB40 : AO090113000132, Neosartorya fischeri NRRL 181 : NFIA_028040 and Aspergillus wentii : Aspwe1_0033535, Aspwe1_0132880	873	117.852
An09g03100	agtA	GPI-anchored alpha-glucanosyltransferase; alpha-glucan transferase; induced by caspofungin	3161	117.009
An01g11630	sec61a	Putative SEC61 complex subunit; expression enhanced by maltose; expression induced by tunicamycin and DTT	621	116.97
An11g02590		Ortholog(s) have role in fatty acid metabolic process, fatty acid oxidation, peroxisome fission and endoplasmic reticulum, peroxisomal importomer complex, peroxisomal membrane localization	1676	116.832
An15g01710	atp7	F1Fo-ATP synthase subunit 7	1369	116.244
An02g14380	hxkA	Hexokinase	3270	116.129
An14g04395		Succinate dehydrogenase (ubiquinone)	326	115.646
An03g05050		Has domain(s) with predicted oxidoreductase activity and role in metabolic process	1535	115.584
An11g01620		Protein of unknown function	1360	115.326
An04g01590		Ortholog of A. fumigatus Af293 : Afu4g07180, A. oryzae RIB40 : AO090023000857, Aspergillus wentii : Aspwe1_0247174, Aspergillus sydowii : Aspsy1_0548380 and Aspergillus terreus NIH2624 : ATET_05493	2405	115.291
An02g08080		Has domain(s) with predicted structural constituent of ribosome activity, role in translation and ribosome localization	1215	114.936
An16g02470		Sulfhydryl oxidase	1274	114.738
An09g00530		Has domain(s) with predicted FAD binding, oxidoreductase activity and role in metabolic process	2568	114.588
An08g02800		Ortholog(s) have role in mRNA cis splicing, via spliceosome and Prp19 complex, post-mRNA release spliceosomal complex, spliceosomal complex localization	1708	114.32
An08g01590		Ortholog(s) have mitochondrial membrane, mitochondrion localization	2536	114.278
An12g08760	vma4	Vacuolar ATPase subunit E	1507	113.878
An07g04850		Ortholog of A. oryzae RIB40 : AO090011000170, Aspergillus versicolor : Aspve1_0046405, Aspergillus niger ATCC 1015 : 53274-mRNA and Aspergillus sydowii : Aspsy1_0159387	1849	113.415
An12g04790		Ortholog of A. fumigatus Af293 : Afu2g09140, Aspergillus clavatus NRRL 1 : ACLA_080950, Aspergillus niger ATCC 1015 : 42387-mRNA and Aspergillus tubingensis : Asptu1_0047655	1059	113.268
An14g00310		Ortholog(s) have mitochondrion localization	3188	113.154
An01g09270		Putative isocitrate lyase	3255	112.347
An01g00120		Ortholog(s) have enoyl-[acyl-carrier-protein] reductase activity, role in aerobic respiration, fatty acid biosynthetic process and mitochondrion localization	2534	111.898
An03g02990		Ortholog of A. fumigatus Af293 : Afu8g02690, A. oryzae RIB40 : AO090010000760, Aspergillus wentii : Aspwe1_0122416 and Aspergillus sydowii : Aspsy1_0162865	2358	111.283
An12g05020	hfbE	Putative hydrophobin	927	110.847
An15g00990		Ortholog(s) have acireductone dioxygenase (Ni2+-requiring) activity and role in L-methionine salvage from methylthioadenosine	1220	110.342
An11g09930		Ortholog(s) have role in ubiquinone biosynthetic process and mitochondrial inner membrane, mitochondrion localization	1613	110.274
An02g07500	lys1	Saccharopine dehydrogenase	2775	110.263
An18g04850		Ortholog(s) have RNA polymerase III activity, role in tRNA 3-trailer cleavage, tRNA transcription by RNA polymerase III, termination of RNA polymerase III transcription and RNA polymerase III complex localization	1034	109.493
An15g06090		Protein of unknown function	1782	109.41
An16g00930		Ortholog(s) have intracellular localization	1455	109.302
An04g06560		Protein of unknown function	1556	109.062
An02g08220		Ortholog(s) have role in F-9775A biosynthetic process, F-9775B biosynthetic process	1709	108.583
An18g01320		Pepsin family secreted protease	2538	108.474
An03g00240		Ortholog of A. nidulans FGSC A4 : AN11036, A. fumigatus Af293 : Afu1g02450, Afu4g04140 and A. oryzae RIB40 : AO090003000331, AO090023000392	3439	108.227
An04g01260		Ortholog of A. nidulans FGSC A4 : AN4395, A. fumigatus Af293 : Afu4g06870, A. oryzae RIB40 : AO090023000901, Aspergillus wentii : Aspwe1_0023285 and Aspergillus sydowii : Aspsy1_0545881	2440	108.046
An02g07250	agaA	Arginase	1932	107.836
An01g08570	trxB	Thioredoxin reductase; induced by growth on starch and lactate	2094	107.57
An13g00660		Ortholog(s) have D-arabinose 1-dehydrogenase [NAD(P)+] activity and role in dehydro-D-arabinono-1,4-lactone biosynthetic process	2343	107.477
An16g04190		Protein of unknown function	1225	106.858
An09g01220		Ortholog of A. nidulans FGSC A4 : AN2326, A. fumigatus Af293 : Afu3g14650, Neosartorya fischeri NRRL 181 : NFIA_062630 and Aspergillus versicolor : Aspve1_0050509	4532	106.823
An16g03590		Putative phosphatidylinositol/-choline transfer protein; expression enhanced by maltose	2114	106.708
An01g12400		3-oxoacyl-[acyl-carrier protein] reductase	1677	106.443
An02g07570		Ortholog(s) have lipid binding, oxysterol binding, phosphatidic acid binding, phosphatidylinositol-4,5-bisphosphate binding, phosphatidylinositol-4-phosphate binding, sterol transfer activity	2436	106.031
An14g01590		S-adenosyl-methionine delta-24-sterol-C-methyltransferase	2099	105.784
An09g05650		Has domain(s) with predicted oxidoreductase activity	2947	105.657
An18g05750		Ortholog(s) have transferase activity, role in maturation of SSU-rRNA and cytoplasm localization	2125	105.512
An14g00010	srgA	Putative Rab GTPase; required for protein secretion on glucose but not on maltodextrin as carbon source; induced by caspofungin	1222	104.737
An07g05820		Ortholog of A. nidulans FGSC A4 : AN4578/usgS, A. fumigatus Af293 : Afu2g02010/usgS, A. oryzae RIB40 : AO090011000471, Aspergillus wentii : Aspwe1_0173282 and Aspergillus sydowii : Aspsy1_0059300	2501	104.72
An02g11680		Ortholog(s) have translation initiation factor activity, role in cytoplasmic translational initiation and intracellular localization	2693	104.66
An06g01860		Ortholog of A. nidulans FGSC A4 : AN10454, A. fumigatus Af293 : Afu6g12650, A. oryzae RIB40 : AO090003000382, Neosartorya fischeri NRRL 181 : NFIA_058610 and Aspergillus wentii : Aspwe1_0033674	1519	104.631
An02g12080		Ortholog of A. nidulans FGSC A4 : AN2978, A. fumigatus Af293 : Afu3g08440, Aspergillus wentii : Aspwe1_0552062, Aspergillus sydowii : Aspsy1_0087327 and Aspergillus terreus NIH2624 : ATET_01626	1188	104.057
An15g07710		Has domain(s) with predicted membrane localization	934	103.901
An05g02320		Ortholog of A. nidulans FGSC A4 : AN2626, AN1620, A. fumigatus Af293 : Afu8g02040/och3, A. niger CBS 513.88 : An03g01090/hocA and A. oryzae RIB40 : AO090010000615	2351	103.817
An08g11120		Ortholog of A. niger CBS 513.88 : An02g10030, An06g00920, A. oryzae RIB40 : AO090701000867, Aspergillus niger ATCC 1015 : 37733-mRNA, 52530-mRNA and Aspergillus zonatus : Aspzo1_0076808	1189	103.295
An06g00190		Sedolisin family secreted protease; lysosomal pepstatin-insensitive protease	3235	103.231
An18g06120		Putative secreted protein; expression induced by tunicamycin and DTT	3029	103.208
An02g07040	scl1	20S CP alpha subunit of the proteasome	1745	103.171
An13g03940		Long-chain-acyl-CoA dehydrogenase	2206	103.044
An04g03210		Ortholog of A. nidulans FGSC A4 : AN1718, AN1714, A. fumigatus Af293 : Afu4g08380, Afu4g08420, A. niger CBS 513.88 : An04g03190 and A. oryzae RIB40 : AO090023000718	1320	102.538
An08g00770		Ortholog of A. nidulans FGSC A4 : AN1362, A. fumigatus Af293 : Afu1g09250, A. oryzae RIB40 : AO090005001616, Aspergillus wentii : Aspwe1_0024539 and Aspergillus sydowii : Aspsy1_0053010	2283	102.444
An03g06870		Cytidine deaminase	1474	102.416
An16g01780		Ortholog of A. fumigatus Af293 : Afu5g01920, A. oryzae RIB40 : AO090003001326, Aspergillus wentii : Aspwe1_0174201, Aspergillus sydowii : Aspsy1_0029040 and Aspergillus terreus NIH2624 : ATET_09813	1027	102.305
An09g04090		Ortholog(s) have protein serine/threonine kinase activity	1454	102.137
An11g09650		Ortholog of A. nidulans FGSC A4 : AN4779, A. fumigatus Af293 : Afu3g06660, A. oryzae RIB40 : AO090020000332, Aspergillus wentii : Aspwe1_0173599 and Aspergillus sydowii : Aspsy1_0087834	1987	101.991
An02g03380		Ortholog of A. nidulans FGSC A4 : AN1127, AN7386, A. fumigatus Af293 : Afu1g11740, A. niger CBS 513.88 : An08g03700 and A. oryzae RIB40 : AO090026000507	1704	101.974
An15g02780		Protein of unknown function	1786	101.733
An02g03120	gdiA	Putative GDP dissociation inhibitor	2890	101.171
An07g08300	cypA	Peptidyl-proline cis-trans isomerase; cyclophilin; putative cellular target for cyclosporin A	1422	101.113
An04g03750		Ortholog(s) have glucose-6-phosphate 1-epimerase activity and fungal biofilm matrix localization	1780	100.941
An18g06610	atg10	E2-like conjugating enzyme; predicted role in autophagy	926	100.901
An14g05765		Ortholog of Aspergillus tubingensis : Asptu1_0194943, Aspergillus brasiliensis : Aspbr1_0190598, Aspergillus kawachii : Aspka1_0180892 and Aspergillus acidus : Aspfo1_0034914	601	100.724
An14g01920		Protein of unknown function	570	100.543
An02g10700		Has domain(s) with predicted electron transfer activity, heme binding, iron ion binding, monooxygenase activity, oxidoreductase activity and acting on paired donors, more	2484	100.451
An02g11970		Ortholog(s) have alkaline phosphatase activity, phosphatase activity, phosphoglycolate phosphatase activity, phosphoprotein phosphatase activity	1713	100.442
An01g07660		Ortholog(s) have cell surface localization	2786	99.9413
An14g00530		Ortholog(s) have role in cellular copper ion homeostasis and yeast-form cell wall localization	746	99.654
An14g03940		Protein of unknown function	841	99.2619
An14g00430		Ortholog(s) have mitochondrion localization	1714	99.2246
An13g01920		Acetyl-CoA C-acetyltransferase, acetoacetyl-CoA thiolase	2357	98.7549
An09g03980		Ortholog of A. nidulans FGSC A4 : AN10317, A. fumigatus Af293 : Afu3g14445, A. oryzae RIB40 : AO090701000586, Neosartorya fischeri NRRL 181 : NFIA_062810 and Aspergillus wentii : Aspwe1_0107543	1732	98.7447
An17g00170		Ortholog of A. nidulans FGSC A4 : AN10975, A. fumigatus Af293 : Afu5g06970, A. oryzae RIB40 : AO090701000290, Aspergillus versicolor : Aspve1_0135244 and Aspergillus clavatus NRRL 1 : ACLA_010110	2128	98.6783
An01g04710		Adenylate kinase	1213	98.6677
An01g10070		Ortholog(s) have 7S RNA binding activity and role in SRP-dependent cotranslational protein targeting to membrane, SRP-dependent cotranslational protein targeting to membrane, signal sequence recognition	1389	98.6567
An15g06910		Has domain(s) with predicted palmitoyltransferase activity, zinc ion binding activity	2451	98.4306
An08g11060		Ortholog of A. oryzae RIB40 : AO090003000581, Aspergillus niger ATCC 1015 : 37730-mRNA, Aspergillus brasiliensis : Aspbr1_0135071 and Aspergillus tubingensis : Asptu1_0027007	1267	98.4212
An16g06950		Ortholog(s) have carboxylic acid transmembrane transporter activity and role in carboxylic acid transport	2920	97.7211
An04g06400		Ortholog of A. nidulans FGSC A4 : AN1995, A. fumigatus Af293 : Afu4g10400, A. oryzae RIB40 : AO090003001177, Aspergillus wentii : Aspwe1_0022851 and Aspergillus sydowii : Aspsy1_0053931	7167	97.6189
An02g07860		Ortholog(s) have role in filamentous growth, filamentous growth of a population of unicellular organisms, positive regulation of transcription by RNA polymerase II, regulation of filamentous growth of a population of unicellular organisms	5106	97.557
An08g00970	rps28	Ribosomal protein of the small subunit	963	97.4498
An09g01710		Ortholog of A. nidulans FGSC A4 : AN0788 and A. niger CBS 513.88 : An09g02430, An03g05960, An09g00710, An09g00820	1363	97.0258
An07g04660		Ortholog of A. nidulans FGSC A4 : AN4699, A. oryzae RIB40 : AO090020000435, Aspergillus wentii : Aspwe1_0278331, Aspergillus versicolor : Aspve1_0053730 and Aspergillus clavatus NRRL 1 : ACLA_011760	5493	96.9449
An09g00670	gelD	Putative 1,3-beta-glucanosyltransferase; predicted signal peptide secretion sequence	2807	96.7277
An03g00230		Has domain(s) with predicted amino acid transmembrane transporter activity, role in amino acid transmembrane transport and membrane localization	2989	96.6858
An14g03520	dfgC	Putative endomannanase; induced by caspofungin	2587	96.5451
An16g04690		Ortholog(s) have role in ribosomal small subunit assembly	965	96.4296
An14g00210		Ortholog(s) have role in cellular response to drug, endoplasmic reticulum to Golgi vesicle-mediated transport, vesicle fusion with Golgi apparatus, vesicle-mediated transport	1588	96.2042
An18g05070		Ortholog(s) have proteasome regulatory particle, lid subcomplex localization	2004	95.5655
An03g05260		Ortholog(s) have chitosan binding activity	1900	95.5287
An09g00600		Ortholog of A. nidulans FGSC A4 : AN0992, A. fumigatus Af293 : Afu8g01860, Neosartorya fischeri NRRL 181 : NFIA_095470 and Aspergillus wentii : Aspwe1_0043470, Aspwe1_0044332	1409	95.509
An04g04040		Ortholog(s) have protein disulfide oxidoreductase activity, thioredoxin-disulfide reductase activity and role in negative regulation of transcription by RNA polymerase II, proteasome-mediated ubiquitin-dependent protein catabolic process	2028	95.3569
An17g01390		Has domain(s) with predicted cytoplasm localization	2286	95.2178
An12g01110		Cystathionine gamma-synthase	1886	95.1996
An08g06030		Has domain(s) with predicted nucleic acid binding activity	1352	95.1817
An02g03130		Ortholog of A. fumigatus Af293 : Afu2g11162, Neosartorya fischeri NRRL 181 : NFIA_086450, Aspergillus wentii : Aspwe1_0175462 and Aspergillus versicolor : Aspve1_0027796	914	95.0521
An07g08170		Inosine-5?-monophosphate dehydrogenase	2793	94.8631
An04g05930		Ortholog(s) have oxidoreductase activity, role in very long-chain fatty acid metabolic process and endoplasmic reticulum membrane localization	1640	94.7688
An07g02200		Protein involved in siroheme biosythesis	1266	94.6585
An11g06970		Protein of unknown function; expression induced by tunicamycin and DTT	1266	94.1076
An18g03405		Protein of unknown function	366	93.8568
An02g05340		Has domain(s) with predicted nucleic acid binding activity	1415	93.824
An14g04080		Ubiquinol-cytochrome c reductase	1502	93.7515
An15g01200		Ortholog of A. nidulans FGSC A4 : AN6588, A. fumigatus Af293 : Afu6g04300, A. oryzae RIB40 : AO090701000121, Aspergillus wentii : Aspwe1_0048668 and Aspergillus sydowii : Aspsy1_0164200	704	93.6516
An15g01920	mcsA	2-methylcitrate synthase, component of the methyl citric acid cycle	2195	93.6261
An02g12640		Putative RNA-binding protein	2508	93.1613
An02g12360		Ortholog(s) have role in negative regulation of Arp2/3 complex-mediated actin nucleation and actin cortical patch, cytoplasm localization	1429	92.919
An16g07040		Protein similar to cell wall glucanase Scw10p; expression repressed by tunicamycin and DTT	1845	92.6175
An02g09090		Mutarotase enzyme	1753	92.3556
An07g05260		Ortholog of A. nidulans FGSC A4 : AN4654, A. fumigatus Af293 : Afu2g01720, Aspergillus sydowii : Aspsy1_0155851 and Aspergillus carbonarius ITEM 5010 : Acar5010_208321	2907	92.2574
An03g05530		Endo-beta-1,4-glucanase	1146	91.8143
An03e00780	tI(AAU)1	tRNA-Ile, predicted by tRNAscan-SE; AAU anticodon	106	91.4657
An14g02280		Ortholog of A. nidulans FGSC A4 : AN2473, A. fumigatus Af293 : Afu4g03090, A. niger CBS 513.88 : An16g01740 and A. oryzae RIB40 : AO090102000258, AO090003001331	2250	91.4514
An16g04940		Ortholog(s) have role in rRNA export from nucleus	1574	91.3684
An01g03100		Putative vacuolar Ca2+/H+ exchanger	2068	91.1939
An08g08720		Has domain(s) with predicted heme binding, peroxidase activity and role in oxidation-reduction process, response to oxidative stress	1431	91.1918
An11g01970		Putative pyroglutamyl peptidase	1251	90.9802
An06g01370		3-oxoadipate CoA transferase	2391	90.9312
An12g10780		Protein of unknown function	3637	90.8587
An12g01640		Protein of unknown function	2343	90.7268
An01g06050		Ortholog of A. nidulans FGSC A4 : AN10073, A. fumigatus Af293 : Afu1g02200, A. oryzae RIB40 : AO090005000879, Neosartorya fischeri NRRL 181 : NFIA_022450 and Aspergillus clavatus NRRL 1 : ACLA_032230	1414	90.6513
An12g08270		Has domain(s) with predicted catalytic activity, oxidoreductase activity	1993	90.5764
An04g09990		Has domain(s) with predicted oxidoreductase activity and role in metabolic process	1327	90.4306
An04g01800		Ortholog(s) have endopeptidase activator activity and role in proteasomal ubiquitin-independent protein catabolic process, proteasome-mediated ubiquitin-dependent protein catabolic process	1162	90.3747
An14g01440		Has domain(s) with predicted oxidoreductase activity, oxidoreductase activity, acting on the aldehyde or oxo group of donors, NAD or NADP as acceptor activity and role in oxidation-reduction process	2225	90.1484
An05g00430		Ortholog of A. fumigatus Af293 : Afu2g07840, A. oryzae RIB40 : AO090701000806, Neosartorya fischeri NRRL 181 : NFIA_083550, Aspergillus wentii : Aspwe1_0629899 and Aspergillus versicolor : Aspve1_0082834	1013	90.0884
An08g02090		Ortholog of A. nidulans FGSC A4 : AN1250, A. fumigatus Af293 : Afu1g10220, Neosartorya fischeri NRRL 181 : NFIA_015430 and Aspergillus versicolor : Aspve1_0119420	2729	90.0082
An11g01400		Protein of unknown function	1693	89.342
An02g01580		Has domain(s) with predicted role in intracellular protein transport	1484	89.1425
An17g00780		Has domain(s) with predicted role in GPI anchor biosynthetic process and endoplasmic reticulum membrane localization	2444	88.77
An12g07570	sncA	Predicted vesicular SNARE, involved in vesicular transport	870	88.4593
An04g01450		Has domain(s) with predicted FMN binding, catalytic activity, oxidoreductase activity and role in oxidation-reduction process	1895	88.4519
An07g04300		Putative 3-methylcrotonyl-CoA carboxylase	3521	88.341
An07g06530		Protein similar to multicopy suppressor Sur7p; expression repressed by tunicamycin and DTT	1271	87.833
An11g01760		Protein similar to proteasome 20S subunit Pre2p	2100	87.5275
An02g06710	mpt4	Suppressor of tom1 protein	2171	87.5162
An07g04280		Has domain(s) with predicted acyl-CoA dehydrogenase activity, flavin adenine dinucleotide binding, oxidoreductase activity, acting on the CH-CH group of donors activity and role in oxidation-reduction process	2190	87.2902
An15g03010		Ortholog(s) have Rab guanyl-nucleotide exchange factor activity and role in chromosome organization, endoplasmic reticulum to Golgi vesicle-mediated transport	1444	87.2321
An02g11660		Has domain(s) with predicted catalytic activity and role in metabolic process	1114	87.1724
An09g06250		Ortholog(s) have metalloaminopeptidase activity, role in cytoplasm to vacuole transport by the Cvt pathway and Cvt complex, extracellular region, fungal-type vacuole localization	2113	86.9905
An01g02000		Has domain(s) with predicted carboxy-lyase activity, catalytic activity, pyridoxal phosphate binding activity and role in carboxylic acid metabolic process, cellular amino acid metabolic process	2334	86.8496
An16g08830		Putative SEC63 complex subunit; expression enhanced by maltose; expression induced by tunicamycin and DTT	1296	86.8353
An19g00340		Has domain(s) with predicted calcium:proton antiporter activity, cation transmembrane transporter activity, role in calcium ion transport, cation transport, transmembrane transport and integral component of membrane localization	1933	86.7993
An16g06750		Protein with similarity to D-stereospecific aminopeptidase; acid protease; expression induced by tunicamycin and DTT	2316	86.7867
An13g03080		Ortholog of A. nidulans FGSC A4 : AN8503, Aspergillus wentii : Aspwe1_0177501, Aspergillus versicolor : Aspve1_0046851 and Aspergillus sydowii : Aspsy1_0159981	687	86.6942
An02g12750		Ortholog(s) have unfolded protein binding activity, role in protein folding and chaperonin-containing T-complex localization	2612	86.6416
An02g08680		Ortholog of A. nidulans FGSC A4 : AN3114, A. fumigatus Af293 : Afu3g12710, A. oryzae RIB40 : AO090012000852, Aspergillus wentii : Aspwe1_0105294 and Aspergillus sydowii : Aspsy1_0056161	1502	86.6376
An01g07870		Has domain(s) with predicted phospholipid binding activity	2501	86.5568
An03g06220		Putative 1,3-beta-glucanosyltransferase; secreted protein	3350	86.5327
An01g09480		Ortholog(s) have CDP-diacylglycerol-serine O-phosphatidyltransferase activity	1402	86.4951
An07g02180		E2 dihydrolipoamide acetyltransferase	4140	86.4464
An07g09220		Ortholog of A. nidulans FGSC A4 : AN5191, A. fumigatus Af293 : Afu6g07250, A. oryzae RIB40 : AO090005001576, Neosartorya fischeri NRRL 181 : NFIA_052930 and Aspergillus wentii : Aspwe1_0040868	1563	86.3347
An01g04080		Ortholog of A. nidulans FGSC A4 : AN0406, A. fumigatus Af293 : Afu1g04990, A. oryzae RIB40 : AO090003000834, Aspergillus wentii : Aspwe1_0104266 and Aspergillus sydowii : Aspsy1_0639570	2640	86.2707
An07g05170		Protein of unknown function	1579	85.8081
An12g08890		Ortholog(s) have extracellular region localization	1427	85.5576
An03g05540		Has domain(s) with predicted glutathione transferase activity	1528	85.5109
An08g00370		Ortholog(s) have copper chaperone activity and role in cellular copper ion homeostasis, cellular iron ion homeostasis, cellular response to oxidative stress, copper ion transport, regulation of iron ion transmembrane transport	506	85.4757
An08g04840		Ortholog of Aspergillus tubingensis : Asptu1_0036554, Aspergillus kawachii : Aspka1_0183194 and Aspergillus niger ATCC 1015 : 177034-mRNA	1005	85.336
An16g05520		Ortholog(s) have copper chaperone activity, superoxide dismutase copper chaperone activity	1213	85.021
An07g09110		Ortholog(s) have kynurenine 3-monooxygenase activity	2290	85.0141
An16g00920	pmp20	Putative peroxiredoxin; peroxisomal membrane protein; expression regulated by growth on starch and lactate	1002	84.9683
An04g09170		Ortholog(s) have ATPase activity, protein binding, bridging, protein phosphatase regulator activity, ubiquitin binding activity	3686	84.7546
An15g05920		Ortholog(s) have TBP-class protein binding activity, role in RNA polymerase II preinitiation complex assembly, transcription initiation from RNA polymerase II promoter and transcription factor TFIIA complex localization	637	84.5626
An12g00440		Ortholog of A. nidulans FGSC A4 : AN9091, A. fumigatus Af293 : Afu7g02220, Aspergillus wentii : Aspwe1_0042339, Aspergillus sydowii : Aspsy1_0120658 and Aspergillus terreus NIH2624 : ATET_01854	1329	84.439
An02g10660		S-adenosylmethionine synthetase18364712	1722	84.3217
An14g01470		Ortholog of A. nidulans FGSC A4 : AN7140, A. fumigatus Af293 : Afu4g13890, Afu4g03722, A. niger CBS 513.88 : An03g02300, An14g01500 and A. oryzae RIB40 : AO090003000220, AO090020000699	2032	84.3081
An01g05770		Ortholog of A. nidulans FGSC A4 : AN0328, A. fumigatus Af293 : Afu1g02420, A. oryzae RIB40 : AO090005000854, Aspergillus wentii : Aspwe1_0106383 and Aspergillus sydowii : Aspsy1_0144094	1789	84.2432
An01g04120		Has domain(s) with predicted hydrolase activity	881	84.2138
An14g06490		Protein of unknown function	236	84.1866
An04g07160		Has domain(s) with predicted phosphoric diester hydrolase activity and role in lipid metabolic process	1640	83.7757
An01g03350	erg2	Putative C-8 sterol isomerase; expression repressed by tunicamycin and DTT; induced by fenpropimorph	1045	83.4085
An12g08030		Ortholog(s) have RNA binding, RNA helicase activity	2707	83.3821
An04g07040		Has domain(s) with predicted structural molecule activity, role in intracellular protein transport, vesicle-mediated transport and clathrin coat of coated pit, clathrin coat of trans-Golgi network vesicle localization	1248	83.3567
An02g01860		Ortholog of A. nidulans FGSC A4 : AN6245, A. fumigatus Af293 : Afu2g13120, A. oryzae RIB40 : AO090026000269, Aspergillus wentii : Aspwe1_0031335 and Aspergillus sydowii : Aspsy1_0150794	1763	83.3261
An06g01930		Ortholog(s) have structural constituent of ribosome activity and cytosolic small ribosomal subunit, yeast-form cell wall localization	924	83.2166
An02g12960		Protein of unknown function	1086	83.1472
An02g13840		Cytoplasmic ribosomal protein of the small subunit S9	1227	82.9081
An18g03580		Has domain(s) with predicted role in lipid storage and endoplasmic reticulum membrane localization	1329	82.7107
An18g05990		Protein of unknown function	748	82.6338
An18g06140		Protein of unknown function	439	82.2042
An16g08400		Protein of unknown function	642	82.1521
An04g09420		Ortholog of A. nidulans FGSC A4 : AN2821, A. fumigatus Af293 : Afu2g00180, Afu2g17480, A. niger CBS 513.88 : An03g05360 and A. oryzae RIB40 : AO090102000063, AO090009000716	2137	81.8074
An02g09260		Protein similar to nucleolar protein NOP5	2474	81.5557
An01g14730		Putative muconate cycloisomerase; expression repressed by tunicamycin and DTT	1681	81.5016
An11g04168		Ortholog(s) have role in posttranslational protein targeting to endoplasmic reticulum membrane and TRC complex, cytoplasm localization	904	81.4153
An11g02400		Has domain(s) with predicted ATP binding, aminoacyl-tRNA ligase activity, lysine-tRNA ligase activity, nucleic acid binding activity, role in lysyl-tRNA aminoacylation, tRNA aminoacylation for protein translation and cytoplasm localization	2576	81.3886
An15g05730		Ortholog(s) have role in vacuolar acidification and integral component of membrane localization	1078	81.268
An12g03660		Ortholog(s) have protein C-terminal S-isoprenylcysteine carboxyl O-methyltransferase activity	1147	81.1072
An18g02110		Ortholog(s) have role in asexual sporulation resulting in formation of a cellular spore, negative regulation of asexual sporulation resulting in formation of a cellular spore and sexual reproduction, more	1221	81.0447
An12g04750		Ortholog(s) have role in mitochondrion inheritance, negative regulation of proteolysis, protein folding, replicative cell aging and mitochondrial inner membrane, mitochondrial membrane, mitochondrion, plasma membrane localization	1379	81.0063
An01g08120		Ortholog(s) have role in cleistothecium development, conidiophore development, conidium formation, entrainment of circadian clock by photoperiod, protein deneddylation, regulation of circadian rhythm, regulation of growth rate	1278	80.957
An18g02680		Has domain(s) with predicted electron transfer activity, heme binding, iron ion binding, monooxygenase activity, oxidoreductase activity, acting on paired donors, with incorporation or reduction of molecular oxygen activity	1949	80.7594
An07g05370		Ortholog(s) have role in cellular response to drug	1184	80.5138
An12g03570	pyrG	Orotidine-5-phosphate decarboxylase; mutants show decreased resistance to weak acid preservatives	1147	80.3068
An04g09430		Protein of unknown function	245	80.2261
An18g02120		Protein of unknown function	694	80.1343
An14g06870		Ribonucleotide reductase	1792	80.1298
An04g02120		Ortholog(s) have role in ribosomal large subunit assembly and cytosolic large ribosomal subunit localization	948	79.9644
An08g10000	noxA	Putative NADPH oxidase	2255	79.9053
An02g02270		Has domain(s) with predicted membrane localization	2044	79.7777
An11g02200		Putative 4-hydroxyphenylpyruvate dioxygenase	1729	79.6555
An14g06480		Ortholog(s) have Prp19 complex, U1 snRNP, U2 snRNP, U2-type prespliceosome, U4/U6 x U5 tri-snRNP complex, U5 snRNP, post-mRNA release spliceosomal complex, spliceosomal complex localization	825	79.2166
An02g06660		Ortholog(s) have role in asexual sporulation resulting in formation of a cellular spore, cellular response to heat and cell septum, cell surface localization	1019	79.1565
An02g02660	dfgG	Predicted mannan endo-1,6-alpha-mannosidase; predicted role in carbohydrate catabolism	2519	78.9238
An08g11230		Protein of unknown function	1643	78.644
An04g02970		Ortholog of A. nidulans FGSC A4 : AN9242, Aspergillus versicolor : Aspve1_0188167, Aspergillus niger ATCC 1015 : 54568-mRNA and Aspergillus sydowii : Aspsy1_0173138	2046	78.512
An01g05720		Protein of unknown function	1011	78.3444
An06g00820		Ortholog(s) have guanyl-nucleotide exchange factor activity, translation initiation factor activity, role in cytoplasmic translational initiation and eukaryotic translation initiation factor 2B complex localization	2520	78.2258
An15g01840		Secoisolariciresinol dehydrogenase	1245	78.1686
An07g02310		Ortholog(s) have glutathione peroxidase activity, glutathione transferase activity and cytoplasm, intracellular, nucleus localization	813	77.9472
An02g03460		Ortholog(s) have role in endocytosis, establishment or maintenance of actin cytoskeleton polarity, vacuole organization and integral component of Golgi membrane localization	1784	77.9169
An11g11240		Ortholog(s) have translation release factor activity, role in mitochondrial translation, mitochondrial translational termination, translational termination and mitochondrial inner membrane, mitochondrion localization	1899	77.879
An01g12960		Ortholog(s) have butyryl-CoA dehydrogenase activity and role in fatty acid beta-oxidation using acyl-CoA dehydrogenase	1867	77.6135
An02g08990		Ortholog of A. nidulans FGSC A4 : AN3140, A. oryzae RIB40 : AO090012000820, Aspergillus wentii : Aspwe1_0050036, Aspergillus sydowii : Aspsy1_1171750 and Aspergillus terreus NIH2624 : ATET_04095	1792	77.5239
An14g06760		Ortholog(s) have uracil-5-carboxylate decarboxylase activity	1456	77.154
An11g06590		Ortholog(s) have 2-hexaprenyl-6-methoxy-1,4-benzoquinone methyltransferase activity, role in aerobic respiration, cellular response to drug, ubiquinone biosynthetic process and mitochondrial matrix, mitochondrion localization	1237	77.0601
An04g02580		Threonine dehydratase	2195	77.0523
An08g00560		Methylene-fatty-acylphospholipid synthase	1549	76.7926
An03g00980		Ortholog of A. fumigatus Af293 : Afu1g01140, A. oryzae RIB40 : AO090102000017, Neosartorya fischeri NRRL 181 : NFIA_023450 and Aspergillus versicolor : Aspve1_0142180	994	76.6549
An09g06480		Ortholog of A. nidulans FGSC A4 : AN8233, A. fumigatus Af293 : Afu5g03690, A. oryzae RIB40 : AO090102000579, Aspergillus wentii : Aspwe1_0043075 and Aspergillus sydowii : Aspsy1_0061882	1797	76.6497
An03g03360		Ortholog(s) have carnitine transmembrane transporter activity, carnitine:acyl carnitine antiporter activity and role in acetate catabolic process, carbon utilization, carnitine transport, fatty acid metabolic process	1435	76.4855
An07g02700		Ortholog(s) have mitochondrion localization	1457	76.3829
An18g06160		Has domain(s) with predicted transcription coregulator activity, role in regulation of transcription by RNA polymerase II and mediator complex localization	1073	76.1274
An04g09120		Ortholog(s) have NEDD8 transferase activity, cullin family protein binding, protein binding, bridging, ubiquitin conjugating enzyme binding, ubiquitin-like protein binding activity	2090	75.9554
An15g07110		Homocysteine S-methyltransferase	1334	75.8508
An04g04870		Ortholog(s) have manganese ion binding, superoxide dismutase activity	1038	75.835
An11g02790		Protein of unknown function	393	75.8139
An16g05470		Has domain(s) with predicted nucleic acid binding, nucleotide binding activity	1329	75.4993
An02g01020		Protein of unknown function	805	75.3695
An15g01900		Has domain(s) with predicted amino acid transmembrane transporter activity, role in amino acid transmembrane transport and membrane localization	1962	75.1081
An17g02180		Ortholog(s) have protein-containing complex binding activity, role in endoplasmic reticulum unfolded protein response, ubiquitin-dependent ERAD pathway and endoplasmic reticulum localization	1581	74.946
An04g04810		Has domain(s) with predicted role in nucleotide-excision repair, transcription, DNA-templated and transcription factor TFIIH core complex localization	2274	74.8467
An07g02820		Ortholog(s) have role in endoplasmic reticulum tubular network membrane organization, nuclear envelope organization, nuclear pore distribution, nuclear pore organization, spindle pole body localization to nuclear envelope	1349	74.7728
An04g02420		Ortholog(s) have ornithine decarboxylase activity and role in DNA biosynthetic process, nuclear division, putrescine biosynthetic process, spermidine biosynthetic process, spore germination	1654	74.7442
An06g01890		Putative HIT family protein; repressed by growth on starch and lactate	1308	74.4387
An07g08850		Ortholog(s) have structural constituent of ribosome activity and role in maturation of SSU-rRNA from tricistronic rRNA transcript (SSU-rRNA, 5.8S rRNA, LSU-rRNA), ribosomal small subunit assembly	1154	74.4311
An14g00140		Ortholog of A. nidulans FGSC A4 : AN6983, A. oryzae RIB40 : AO090206000017, Aspergillus versicolor : Aspve1_0033136, Aspergillus niger ATCC 1015 : 41464-mRNA and Aspergillus terreus NIH2624 : ATET_02762	2035	74.4225
An13g01070		40S ribosomal protein S28.e	861	74.2943
An02g13820		Ortholog of A. nidulans FGSC A4 : AN4805, A. fumigatus Af293 : Afu3g06990, A. oryzae RIB40 : AO090020000295, Aspergillus wentii : Aspwe1_0157674 and Aspergillus sydowii : Aspsy1_0087809	1567	74.2823
An08g10480		Ortholog(s) have role in maturation of LSU-rRNA and cytosolic large ribosomal subunit localization	1461	74.2162
An01g13350		Ortholog(s) have ATPase activity, misfolded protein binding activity, role in cellular heat acclimation, cellular response to misfolded protein, protein refolding, protein unfolding and cytoplasm, nucleus localization	3240	74.1523
An09g05625		Ortholog of A. nidulans FGSC A4 : AN11597, A. fumigatus Af293 : Afu5g03300, Neosartorya fischeri NRRL 181 : NFIA_038810, Aspergillus wentii : Aspwe1_0114897 and Aspergillus versicolor : Aspve1_0203178	332	74.1235
An13g03150		Has domain(s) with predicted catalytic activity and role in metabolic process	1491	74.0898
An11g02785		Ortholog of A. nidulans FGSC A4 : AN10508, Neosartorya fischeri NRRL 181 : NFIA_053590, Aspergillus wentii : Aspwe1_0177107 and Aspergillus versicolor : Aspve1_0138892	590	73.8696
An02g02940		Has domain(s) with predicted ubiquitin-protein transferase activity, role in protein ubiquitination and ubiquitin ligase complex localization	1163	73.8186
An02g11860		Ortholog of A. nidulans FGSC A4 : AN5437, AN2941, A. fumigatus Af293 : Afu3g08250, Afu6g13630, A. oryzae RIB40 : AO090005001453, AO090103000325 and Aspergillus wentii : Aspwe1_0144636, Aspwe1_0552642	1571	73.8143
An14g03070		Has domain(s) with predicted FAD binding, UDP-N-acetylmuramate dehydrogenase activity, flavin adenine dinucleotide binding, oxidoreductase activity, oxidoreductase activity, acting on CH-OH group of donors activity	1913	73.5853
An08g03070		Aminomethyltransferase	1734	73.5693
An04g03195		Protein of unknown function	200	73.3947
An07g07380		Has domain(s) with predicted nucleobase transmembrane transporter activity, transmembrane transporter activity, role in nucleobase transport, transmembrane transport and integral component of membrane, membrane localization	2361	73.1124
An02g06010		Ortholog of A. nidulans FGSC A4 : AN5965, A. fumigatus Af293 : Afu2g10540, A. oryzae RIB40 : AO090011000586, Aspergillus wentii : Aspwe1_0175404 and Aspergillus sydowii : Aspsy1_0151977	697	73.0802
An14g02460	fhbA	Flavohemoglobin	1433	72.968
An06g01210		Ortholog of A. nidulans FGSC A4 : AN5340, A. fumigatus Af293 : Afu6g14260/lcp5, A. oryzae RIB40 : AO090103000410, Aspergillus wentii : Aspwe1_0033389 and Aspergillus sydowii : Aspsy1_0050290	1333	72.9362
An16g06230		Protein of unknown function	673	72.7129
An17g00560		Ortholog(s) have phosphatidylinositol-3-phosphate binding, protein carrier activity and role in ascospore-type prospore membrane assembly, intracellular protein transport, retrograde transport, endosome to Golgi, vesicle-mediated transport	2126	72.3241
An07g07860		Ortholog(s) have thiol-dependent ubiquitin-specific protease activity	1343	72.0631
An06g01220		Protein of unknown function	858	71.7097
An16g07440		Ortholog of A. nidulans FGSC A4 : AN1520, A. fumigatus Af293 : Afu8g05290, A. oryzae RIB40 : AO090005000620, Aspergillus wentii : Aspwe1_0045135 and Aspergillus sydowii : Aspsy1_0145694	1762	71.6622
An12g10710		Ortholog of A. nidulans FGSC A4 : AN8638/cetJ, A. fumigatus Af293 : Afu2g14320, Afu3g13130, Afu4g00730, Afu8g01530, A. niger CBS 513.88 : An01g01230 and A. oryzae RIB40 : AO090113000154	814	71.5932
An07g09160		Ortholog(s) have cargo receptor activity and role in ascospore formation, axial cellular bud site selection, endoplasmic reticulum to Golgi vesicle-mediated transport	771	71.5566
An03g05590		Has domain(s) with predicted nucleobase transmembrane transporter activity, role in nucleobase transport, transmembrane transport and membrane localization	2923	71.4835
An07g10240		Ortholog(s) have role in protein import into peroxisome matrix	1521	71.3076
An08g05410		Ortholog of A. nidulans FGSC A4 : AN1027, A. fumigatus Af293 : Afu1g12660, A. oryzae RIB40 : AO090012000716, Aspergillus wentii : Aspwe1_0040406 and Aspergillus sydowii : Aspsy1_0038316	1346	71.0891
An13g03910		Ortholog(s) have allantoinase activity and role in purine nucleobase catabolic process	1779	71.0859
An15g03410		Ortholog of A. fumigatus Af293 : Afu2g14820, A. oryzae RIB40 : AO090026000793, Aspergillus wentii : Aspwe1_0693332 and Aspergillus sydowii : Aspsy1_0045989	871	71.0298
An15g01690		Ortholog(s) have RNA binding activity, role in macroautophagy and cell surface, cytosolic large ribosomal subunit, hyphal cell wall localization	790	70.9482
An09g05420		Putative signal peptidase complex subunit; expression enhanced by maltose; expression induced by tunicamycin and DTT	1077	70.6784
An04g05620	acuA	Putative acetyl-CoA synthase	2560	70.5806
An15g04880		Has domain(s) with predicted calcium ion binding, calcium-dependent phospholipid binding activity	1681	70.5704
An09g06670		Ortholog(s) have DNA binding, tricarboxylate secondary active transmembrane transporter activity	1508	70.4396
An18g03430		Ortholog of Aspergillus tubingensis : Asptu1_0112479, Aspergillus brasiliensis : Aspbr1_0056299 and Aspergillus acidus : Aspfo1_0062965	1355	70.3998
An09g06750		Ortholog of A. nidulans FGSC A4 : AN12207, A. fumigatus Af293 : Afu5g04280, A. oryzae RIB40 : AO090102000634, Aspergillus wentii : Aspwe1_0053134 and Aspergillus sydowii : Aspsy1_0518128	1241	70.1257
An17g01110		Ortholog(s) have plasma membrane localization	688	70.0656
An18g03820		Serine palmitoyltransferase	2045	69.9412
An08g06650		Ortholog(s) have box H/ACA snoRNA binding activity, role in rRNA pseudouridine synthesis, snRNA pseudouridine synthesis and box H/ACA snoRNP complex, nucleolus localization	977	69.9381
An08g00480		Ortholog(s) have intracellular localization	1292	69.7958
An14g01560		Ortholog of A. nidulans FGSC A4 : AN7143, A. fumigatus Af293 : Afu4g03650, A. oryzae RIB40 : AO090011000292, Aspergillus wentii : Aspwe1_0138173 and Aspergillus sydowii : Aspsy1_0157987	1581	69.5742
An08g01640		Ortholog(s) have molecular adaptor activity, role in posttranslational protein targeting to endoplasmic reticulum membrane, response to heat and TRC complex localization	1256	69.5576
An12g00330		Ortholog of A. fumigatus Af293 : Afu7g02300, A. oryzae RIB40 : AO090038000609, Aspergillus wentii : Aspwe1_0029503 and Aspergillus sydowii : Aspsy1_0161249	899	69.4966
An08g04880		Ortholog(s) have role in mitochondrial respiratory chain complex IV assembly and integral component of mitochondrial inner membrane, mitochondrial membrane, mitochondrial respirasome, plasma membrane localization	929	69.4611
An09g06720		Protein of unknown function	1478	69.4447
An14g06020		Ortholog of A. nidulans FGSC A4 : AN6865, A. fumigatus Af293 : Afu5g13120, A. oryzae RIB40 : AO090120000437, Aspergillus wentii : Aspwe1_0170850 and Aspergillus sydowii : Aspsy1_0144687	1114	69.3301
An11g10450		Ortholog(s) have 5-3 exodeoxyribonuclease activity involved in UV-damage excision repair, 5-flap endonuclease activity, double-stranded DNA 5-3 exodeoxyribonuclease activity, single-stranded DNA 5-3 exodeoxyribonuclease activity	1612	69.0817
An18g04750		Has domain(s) with predicted chaperone binding activity	1016	68.8695
An15g00460		Ortholog(s) have endosome localization	2071	68.6963
An01g02180		Ortholog(s) have nuclear import signal receptor activity, role in inositol metabolic process, protein import into nucleus and nuclear envelope localization	917	68.4837
An01g06390		Ortholog(s) have DNA-binding transcription factor activity, RNA polymerase II-specific activity and role in negative regulation of single-species biofilm formation, negative regulation of transcription by RNA polymerase II	3030	68.3177
An16g09240		Ortholog of A. nidulans FGSC A4 : AN1405, A. fumigatus Af293 : Afu8g03950, A. oryzae RIB40 : AO090103000008, Aspergillus wentii : Aspwe1_0043787 and Aspergillus sydowii : Aspsy1_0041996	1315	68.266
An01g01140		Ortholog of A. nidulans FGSC A4 : AN6764, AN2660, AN7798, A. fumigatus Af293 : Afu8g01960 and A. niger CBS 513.88 : An15g04120, An11g05430, An01g12050, An11g03480	1425	67.8532
An02g13850		Ortholog(s) have cytosolic large ribosomal subunit localization	784	67.7416
An04g08480		Ortholog(s) have SNAP receptor activity, palmitoyltransferase activity	822	67.7258
An01g05650		Ortholog(s) have structural constituent of cytoskeleton activity	1891	67.6074
An07g05990		Has domain(s) with predicted phosphatidylinositol binding activity and role in cell communication	3274	67.5028
An10g00010		Putative alcohol dehydrogenase (catalyzed by glycerol dehydrogenase II (NADP+)	1333	67.4993
An11g01690		cytoplasmic ribosomal protein of the small subunit S4.e	499	67.3633
An05g00080		Ortholog of A. nidulans FGSC A4 : AN5813, A. oryzae RIB40 : AO090011000939, Aspergillus wentii : Aspwe1_0043753, Aspergillus sydowii : Aspsy1_0201714 and Aspergillus terreus NIH2624 : ATET_06862	1129	67.1859
An01g03570	mcr1	Cytochrome-b5 reductase	1248	67.0219
An01g09400		Ortholog of A. nidulans FGSC A4 : AN5657, A. fumigatus Af293 : Afu4g13590, A. oryzae RIB40 : AO090009000210, Aspergillus wentii : Aspwe1_0047218 and Aspergillus sydowii : Aspsy1_0199958	1541	66.983
An03g04340	sec61b	Protein with a predicted role in ER SRP-dependent and -independent protein targeting; SEC61 complex subunit; expression enhanced by maltose	1794	66.8727
An01g02340		Ortholog(s) have carbonyl reductase (NADPH) activity, oxidoreductase activity, serine 3-dehydrogenase activity and intracellular localization	1075	66.8378
An07g02170		Putative v-SNARE; expression enhanced by maltose	943	66.8299
An05g00990		Has domain(s) with predicted oxidoreductase activity and role in oxidation-reduction process	1175	66.8101
An08g03560		Ortholog of A. nidulans FGSC A4 : AN8776, A. oryzae RIB40 : AO090038000281, Aspergillus wentii : Aspwe1_0508022, Aspergillus sydowii : Aspsy1_0035009 and Aspergillus terreus NIH2624 : ATET_00334	1714	66.451
An04g02800		Pyrroline-5-carboxylate reductase	977	66.4375
An04g00110		NADH-ubiquinone oxidoreductase; respiratory-chain NADH dehydrogenase	1170	66.2309
An08g09420		Ortholog(s) have extracellular region localization	591	65.8593
An07g01480		Protein of unknown function	1407	65.8181
An07g07530	crhB	Putative GPI-anchored glucanosyltransferase; induced by caspofungin	1444	65.7663
An01g01620		Ortholog(s) have high-affinity zinc transmembrane transporter activity, zinc ion transmembrane transporter activity	1082	65.6119
An16g01510		Protein of unknown function	1274	65.5514
An05g00160		Cystathionine beta-synthase	2134	65.4482
An12g09990		Ortholog of A. fumigatus Af293 : Afu5g14670 and Aspergillus fumigatus A1163 : AFUB_062340	1899	65.4385
An06g00300	ugtB	Putative UDP-galactofuranose transporter involved in import of UDP-galactofuranose into the Golgi lumen	1459	65.3311
An18g06080		Protein of unknown function	1850	65.1925
An02g09550	hetC2	Putative het-c2 protein	852	65.1534
An01g11820		Has domain(s) with predicted nucleic acid binding, nucleotide binding activity	1837	65.1298
An11g02610	rpnG	26S proteasome Rpn7p regulatory subunit	1640	65.0432
An02g09310		Ortholog(s) have role in cellular response to oxidative stress and fungal-type vacuole lumen, plasma membrane localization	1238	64.9019
An02g00790		Protein of unknown function	2034	64.5195
An02g12430	icdA	NADP+-specific isocitrate dehydrogenase; induced by growth on starch and lactate	1886	64.3653
An04g02410		Ortholog of A. nidulans FGSC A4 : AN10480, A. fumigatus Af293 : Afu4g07990, A. oryzae RIB40 : AO090023000772, Aspergillus wentii : Aspwe1_0102632 and Aspergillus sydowii : Aspsy1_0149200	1149	64.3575
An11g11290		Ortholog of A. nidulans FGSC A4 : AN3467, Aspergillus wentii : Aspwe1_0029470, Aspergillus versicolor : Aspve1_0040518 and Aspergillus clavatus NRRL 1 : ACLA_033380	727	64.2956
An18g05810		Protein with similarity to cytoplasmic ribosomal protein of the small subunit S26	1002	64.2381
An15g06580		Uracil phosphoribosyltransferase	871	64.0741
An02g00500		Protein of unknown function	606	64.0648
An02g03640		Has domain(s) with predicted NADP binding, coenzyme binding, oxidoreductase activity, oxidoreductase activity, acting on the CH-OH group of donors, NAD or NADP as acceptor, phosphogluconate dehydrogenase (decarboxylating) activity	1002	63.9811
An04g06160		Ortholog(s) have ferrous iron binding, ferroxidase activity, iron chaperone activity and role in cellular iron ion homeostasis, cellular response to oxidative stress, glutathione metabolic process, iron-sulfur cluster assembly	734	63.5073
An08g01620		Ortholog(s) have role in ribosome biogenesis and cytosol localization	343	63.4832
An16g02490		Beta-adaptin; expression enhanced by maltose	2569	63.0436
An12g07560		Protein of unknown function	1484	62.9206
An08g06410		Putative actin-like protein; induced by caspofungin	246	62.8317
An06g00620	mal11	Putative alpha-glucoside-hydrogen symporter	1826	62.8213
An01g06780		Ortholog of A. nidulans FGSC A4 : AN9531, AN1600, AN9354, AN4608 and A. fumigatus Af293 : Afu4g03520, Afu5g14130, Afu7g06920	1132	62.7448
An02g14800	pdiA	Protein disulfide isomerase; expression enhanced by maltose; expression induced by tunicamycin and DTT	1777	62.62
An07g07430		Ortholog(s) have role in ribosome biogenesis and cytosolic large ribosomal subunit, preribosome, large subunit precursor localization	808	62.6135
An01g07230		Ortholog of A. fumigatus Af293 : Afu4g11940, A. oryzae RIB40 : AO090102000214, AO090003001021, Aspergillus wentii : Aspwe1_0166602 and Aspergillus sydowii : Aspsy1_0046673	889	62.4485
An08g09780		Ortholog of A. nidulans FGSC A4 : AN7973, A. fumigatus Af293 : Afu3g02175, A. niger CBS 513.88 : An08g11410, An03g06600 and A. oryzae RIB40 : AO090023000748	1464	62.4041
An11g02830		Ortholog(s) have ubiquitin protein ligase binding activity and role in adaptation of signaling pathway by response to pheromone involved in conjugation with cellular fusion, positive regulation of receptor internalization	1617	62.3496
An08g03390		Ortholog of A. nidulans FGSC A4 : AN1169, A. fumigatus Af293 : Afu1g11100, A. oryzae RIB40 : AO090038000299, Neosartorya fischeri NRRL 181 : NFIA_014530 and Aspergillus wentii : Aspwe1_0172243	701	62.1684
An12g09700		Has domain(s) with predicted oxidoreductase activity and role in metabolic process	1086	62.0813
An07g09120		Has domain(s) with predicted aminopeptidase activity, metalloexopeptidase activity, zinc ion binding activity and role in cellular process, proteolysis	1290	61.9796
An16g07990		Ortholog of A. nidulans FGSC A4 : AN10201, A. fumigatus Af293 : Afu8g04826, A. oryzae RIB40 : AO090005000664, Neosartorya fischeri NRRL 181 : NFIA_097640 and Aspergillus wentii : Aspwe1_0645178	2036	61.9664
An03g03010		Ortholog(s) have endopolyphosphatase activity, role in polyphosphate catabolic process and fungal-type vacuole, vacuolar lumen localization	2137	61.6884
An02g07770		Putative trehalose phosphorylase with similarity to Neurospora crassa ccg9	2253	61.1397
An16g06400		Ortholog(s) have single-stranded DNA binding activity and role in DNA repair, DNA strand renaturation, cellular response to drug, interstrand cross-link repair, mitochondrial genome maintenance, recombinational repair	845	61.0363
An08g02530		Glycerol 3-phosphate phosphatase	930	61.0315
An02g04320		Ortholog(s) have role in DNA strand elongation involved in DNA replication, UV-damage excision repair and Elg1 RFC-like complex localization	1293	61.0218
An14g04400		Succinate dehydrogenase (ubiquinone)	382	60.98
An15g01370		Ortholog of A. nidulans FGSC A4 : AN6603, A. fumigatus Af293 : Afu6g04140, Aspergillus wentii : Aspwe1_0036035, Aspergillus sydowii : Aspsy1_0037213 and Aspergillus terreus NIH2624 : ATET_07041	1401	60.8976
An11g10750		Ortholog of A. nidulans FGSC A4 : AN10408, A. fumigatus Af293 : Afu3g05850, A. oryzae RIB40 : AO090020000054, Neosartorya fischeri NRRL 181 : NFIA_071380 and Aspergillus clavatus NRRL 1 : ACLA_033820	1104	60.8758
An15g03220		Ortholog(s) have 2 iron, 2 sulfur cluster binding, RNA polymerase II activating transcription factor binding, disulfide oxidoreductase activity, glutathione disulfide oxidoreductase activity, iron-sulfur cluster binding activity	849	60.7072
An01g11950		DNA-directed RNA polymerase	822	60.6792
An16g08510		Has domain(s) with predicted role in transmembrane transport and integral component of membrane localization	1575	60.5473
An02g02290		1-pyrroline-5-carboxylate dehydrogenase	1737	60.4762
An10g00500		Ortholog(s) have protein carrier activity, protein transporter activity, unfolded protein binding activity	486	60.375
An12g00510		Ortholog(s) have role in maturation of SSU-rRNA from tricistronic rRNA transcript (SSU-rRNA, 5.8S rRNA, LSU-rRNA)	711	60.372
An09g04010	chsB	Putative chitin synthase, class III; induced by caspofungin	2910	60.3682
An06g01120		Ortholog(s) have proteasome binding, single-stranded DNA binding, single-stranded DNA helicase activity, ubiquitin conjugating enzyme activity, ubiquitin-protein transferase activity	749	60.3105
An02g14680	NA	NA	368	60.2514
An02g06770		Ortholog(s) have histone binding activity	972	60.1993
An02g12510		Has domain(s) with predicted ATPase-coupled cation transmembrane transporter activity, metal ion binding, nucleotide binding activity, role in cation transport and integral component of membrane localization	2911	60.1934
An02g05510		Protein of unknown function	360	60.176
An12g08380		Ortholog(s) have actin filament binding, molecular adaptor activity, role in Arp2/3 complex-mediated actin nucleation, actin cortical patch organization, cellular response to drug, spore germination and Arp2/3 protein complex localization	755	59.8873
An07g07760		14-3-3 protein	985	59.8436
An11g07330		Ortholog(s) have role in asperthecin biosynthetic process	1165	59.7504
An04g07520		Protein of unknown function	100	59.6761
An18g02970		Porphobilinogen deaminase (hydroxymethylbilane synthase, Uro I synthase)	995	59.3777
An02g02700		Phosphoribosylglycinamide formyltransferase	715	59.3695
An08g05300		Ortholog(s) have ATP binding, heat shock protein binding activity	2312	59.3603
An11g09670		Ortholog(s) have structural constituent of ribosome activity	489	59.2492
An02g04360		Ortholog of A. nidulans FGSC A4 : AN6294, A. fumigatus Af293 : Afu2g12320, Aspergillus wentii : Aspwe1_0117092, Aspergillus sydowii : Aspsy1_0985663 and Aspergillus terreus NIH2624 : ATET_01165	930	58.854
An02g03400	pup2	20S CP alpha subunit of the proteasome	971	58.8251
An11g01570		Ortholog(s) have poly(A) binding, pre-mRNA binding activity, role in negative regulation of mRNA catabolic process, snoRNA processing and nucleus localization	1417	58.7534
An12g07770		Ortholog of A. nidulans FGSC A4 : AN11117, A. fumigatus Af293 : Afu3g01420, A. oryzae RIB40 : AO090120000171, Aspergillus wentii : Aspwe1_0148352, Aspwe1_0165444 and Aspergillus sydowii : Aspsy1_0092105	789	58.65
An01g13480		Ortholog of A. nidulans FGSC A4 : AN4122, AN2881, AN10123, AN0867, A. fumigatus Af293 : Afu1g13860, Afu1g15180, Afu3g11650 and A. niger CBS 513.88 : An08g07010, An02g07440	1246	58.5871
An02g01740		Ortholog(s) have phenylalanine-tRNA ligase activity, role in mitochondrial phenylalanyl-tRNA aminoacylation and mitochondrion localization	1416	58.5219
An02g14930		Oligosaccharyltransferase complex, gamma subunit; expression enhanced by maltose	1268	58.5015
An08g00510		Ortholog(s) have methionyl glutamyl tRNA synthetase complex localization	1923	58.4715
An14g01010		Ortholog(s) have structural constituent of ribosome activity	1622	58.3823
An04g01120		Tetrahydrofolylpolyglutamate synthase	1142	58.2898
An07g06690		Protein of unknown function	601	58.1453
An18g01560		Ortholog of Aspergillus brasiliensis : Aspbr1_0133898	1244	58.0231
An16g00230	glpF	Putative aquaglyceroporin, trivalent metalloid transporter	2094	57.9328
An07g04270		Ortholog(s) have methylcrotonoyl-CoA carboxylase activity, role in leucine catabolic process and mitochondrion localization	1627	57.9094
An11g00510		ATP:citrate oxaloacetatelyase	1984	57.9
An12g08370		Has domain(s) with predicted thiol-dependent ubiquitinyl hydrolase activity and role in protein deubiquitination, ubiquitin-dependent protein catabolic process	1688	57.8864
An09g03440		Ortholog of A. nidulans FGSC A4 : AN7587, A. fumigatus Af293 : Afu2g15180, A. oryzae RIB40 : AO090012000301, Aspergillus wentii : Aspwe1_0054076 and Aspergillus sydowii : Aspsy1_0058595	968	57.8746
An11g09690		Ortholog(s) have role in positive regulation of mitotic metaphase/anaphase transition, proteasome-mediated ubiquitin-dependent protein catabolic process, protein deneddylation	1519	57.7341
An01g12330		Ortholog(s) have RNA binding, poly(U) RNA binding activity and role in mRNA splicing, via spliceosome, maturation of SSU-rRNA, nuclear-transcribed mRNA catabolic process	466	57.4434
An02g09040		Ortholog of A. fumigatus Af293 : Afu3g13180, A. oryzae RIB40 : AO090012000814, Neosartorya fischeri NRRL 181 : NFIA_064160 and Aspergillus wentii : Aspwe1_0170078	884	57.4226
An16g07380		Has domain(s) with predicted membrane localization	1038	57.3355
An12g07720		Putative ferric (and cupric) reductase	1873	57.2236
An04g07080		Ortholog of S. cerevisiae : YNR021W, A. nidulans FGSC A4 : AN2056, A. fumigatus Af293 : Afu4g09950, A. oryzae RIB40 : AO090003001239 and Aspergillus wentii : Aspwe1_0102440	1372	57.222
An08g00890		Ortholog(s) have role in RNA polymerase II preinitiation complex assembly, cellular response to drug, transcription by RNA polymerase II and transcription factor TFIID complex localization	526	57.2179
An08g07470		Ortholog(s) have cell septum, fungal-type vacuole, late endosome, plasma membrane localization	990	57.1563
An15g00200		6-phosphofructo-2-kinase; D-Fructose-2,6-bisphosphate 2-phosphohydrolase	2076	57.0394
An01g12610		Ortholog(s) have role in endoplasmic reticulum organization, nuclear membrane organization	2213	57.0248
An01g07900	cpcA	bZIP transcription factor; expression enhanced by maltose; the conserved upstream ORF (uORF), An01g07890, was identified in the 5 region of this gene	707	56.9286
An17g02200		Prephenate dehydratase	893	56.9073
An12g09270	lac12	Putative lactose permease; induced by xylose and repressed by glucose	1760	56.8735
An12g01260		Putative benzonitrilase	1073	56.7645
An04g00080		Ortholog of S. cerevisiae : EFM6, A. nidulans FGSC A4 : AN10539, A. fumigatus Af293 : Afu4g05890, A. oryzae RIB40 : AO090672000009 and Aspergillus wentii : Aspwe1_0167304	697	56.6953
An15g00550		Protein of unknown function	929	56.6569
An16g03720		Ortholog(s) have intracellular localization	2223	56.5748
An14g06310		Ortholog(s) have structural constituent of ribosome activity and mitochondrial large ribosomal subunit, mitochondrial ribosome localization	1170	56.5117
An11g02220		Has domain(s) with predicted zinc ion binding activity	2256	56.3148
An02g08330		Protein of unknown function; expression repressed by tunicamycin and DTT	1471	56.312
An11g02050		Has domain(s) with predicted nucleic acid binding, nucleotide binding activity	616	56.2714
An16g02130		Ortholog(s) have role in NADH oxidation, programmed cell death and mitochondrial respiratory chain complex I, membrane segment, mitochondrion localization	559	56.2111
An16g05390	gaaB	L-galactonic acid dehydratase, with activity towards D-gluconate, L-fuconate, D-mannonate, L-mannonate, and D-glucuronate; predicted role in pectin degradation	1359	56.1299
An04g01300		Ortholog of A. nidulans FGSC A4 : AN12229, A. fumigatus Af293 : Afu4g06960, A. oryzae RIB40 : AO090023000891, Aspergillus wentii : Aspwe1_0034659 and Aspergillus sydowii : Aspsy1_0036698	914	56.1173
An11g11090		Ortholog of A. nidulans FGSC A4 : AN3449, A. fumigatus Af293 : Afu3g05550, A. oryzae RIB40 : AO090020000027, Aspergillus wentii : Aspwe1_0173711 and Aspergillus sydowii : Aspsy1_0030135	958	56.0693
An18g04860		Ortholog of Aspergillus tubingensis : Asptu1_0052230	416	56.0401
An08g03000		Ortholog(s) have role in calcium ion transport into cytosol and plasma membrane localization	1228	55.9287
An16g04550		Ortholog of A. nidulans FGSC A4 : AN4931, A. fumigatus Af293 : Afu3g10580, A. oryzae RIB40 : AO090003000603, Aspergillus wentii : Aspwe1_0057684 and Aspergillus sydowii : Aspsy1_0056492	908	55.8026
An07g04160		Ortholog of A. nidulans FGSC A4 : AN4680, A. fumigatus Af293 : Afu5g08990, A. oryzae RIB40 : AO090020000471, Aspergillus wentii : Aspwe1_0048193 and Aspergillus sydowii : Aspsy1_0059440	917	55.7122
An02g07430		Homoserine dehydrogenase	1075	55.671
An18g02140	sbp1	Spi1-GTPase binding protein	936	55.6488
An08g04150		Ortholog(s) have structural constituent of ribosome activity and mitochondrial large ribosomal subunit, mitochondrial ribosome localization	915	55.5907
An16g09210		Ortholog(s) have role in iron-sulfur cluster assembly and CIA complex localization	573	55.5205
An02g02320		Has domain(s) with predicted DNA-binding transcription factor activity, RNA polymerase II-specific, zinc ion binding activity, role in regulation of transcription, DNA-templated and nucleus localization	739	55.5149
An12g05320		Ortholog of A. nidulans FGSC A4 : AN7124, A. niger CBS 513.88 : An09g02090, A. oryzae RIB40 : AO090038000612, AO090003001456 and Aspergillus wentii : Aspwe1_0043585, Aspwe1_0186797	502	55.2662
An18g02980		Putative serine-type endopeptidase	2529	55.2086
An03g01140		Oxalate decarboxylase	1286	55.0741
An18g06810		Ortholog(s) have 6,7-dimethyl-8-ribityllumazine synthase activity, riboflavin binding activity, role in riboflavin biosynthetic process and intracellular, mitochondrial intermembrane space localization	675	55.046
An04g02690		Putative alcohol dehydrogenase	1057	55.0066
An15g04120		Ortholog of A. nidulans FGSC A4 : AN6764, AN2660, AN7798, A. fumigatus Af293 : Afu8g01960 and A. niger CBS 513.88 : An11g05430, An01g12050, An11g03480, An01g01140	1330	55.0032
An12g08740		Protein of unknown function	448	54.8014
An02g00590		Ortholog(s) have role in cellular response to glucose stimulus and cytoplasm localization	1554	54.551
An08g10820		Putative aldehyde dehydrogenase	1307	54.511
An03g04810		Ortholog of A. nidulans FGSC A4 : AN10983, A. fumigatus Af293 : Afu2g01630, A. oryzae RIB40 : AO090701000784, Aspergillus wentii : Aspwe1_0135351 and Aspergillus sydowii : Aspsy1_0046214	689	54.1144
An09g01550	AO-I	Copper/quinone-containing amine oxidase	1836	54.1001
An02g14970		Has domain(s) with predicted oxidoreductase activity, zinc ion binding activity and role in oxidation-reduction process	994	53.9713
An18g04180		Ortholog(s) have structural constituent of ribosome activity, role in rRNA export from nucleus, ribosomal small subunit biogenesis and cytosolic small ribosomal subunit localization	945	53.8763
An12g08730		Has domain(s) with predicted DNA binding, protein dimerization activity	956	53.7831
An18g05050		Has domain(s) with predicted integral component of membrane localization	1039	53.7631
An01g04050		Has domain(s) with predicted hydrolase activity	399	53.75
An07g08890		Ortholog(s) have lipid binding activity	1109	53.6872
An02g09330		Ortholog of A. fumigatus Af293 : Afu3g13460, A. oryzae RIB40 : AO090012000779, Neosartorya fischeri NRRL 181 : NFIA_063890, Aspergillus wentii : Aspwe1_0038130 and Aspergillus versicolor : Aspve1_0070181	1003	53.684
An04g00510		Ortholog of A. nidulans FGSC A4 : AN10542, A. fumigatus Af293 : Afu4g06210, A. oryzae RIB40 : AO090023000969, Aspergillus sydowii : Aspsy1_0094879 and Aspergillus terreus NIH2624 : ATET_05601	812	53.6739
An17g02300		Ortholog(s) have role in DNA replication-independent nucleosome assembly, hyphal growth and hyphal septin ring localization	1248	53.6265
An02g04310		Ortholog of Aspergillus wentii : Aspwe1_0175640, Aspergillus versicolor : Aspve1_0052461, Aspergillus zonatus : Aspzo1_0025200 and Aspergillus sydowii : Aspsy1_0152008	529	53.6166
An14g04980		Ortholog(s) have Prp19 complex, post-mRNA release spliceosomal complex, spliceosomal complex localization	1393	53.583
An08g10780		Has domain(s) with predicted hydrolase activity, hydrolyzing O-glycosyl compounds activity and role in carbohydrate metabolic process	1597	53.5296
An03g00660	tauD	Taurine dioxygenase	1062	53.4797
An11g11170		Ortholog(s) have structural constituent of ribosome activity and mitochondrial large ribosomal subunit, mitochondrial ribosome localization	507	53.4219
An05g00570		Ortholog of A. nidulans FGSC A4 : AN5848, A. fumigatus Af293 : Afu2g08010, A. oryzae RIB40 : AO090011000900, Aspergillus wentii : Aspwe1_0031468, Aspwe1_0628489 and Aspergillus sydowii : Aspsy1_0044787	1784	53.3807
An01g11930		Histidinol-phosphate aminotransferase	1201	53.3667
An03g00330		Protein of unknown function	801	53.3332
An12g02180		Protein of unknown function	293	53.3021
An02g04800		Ortholog(s) have protein binding, bridging, ubiquitin binding activity	1746	53.2671
An15g00510	pre5	20S CP alpha subunit of the proteasome	790	53.2112
An01g10720		Ortholog(s) have structural constituent of ribosome activity and cytosolic small ribosomal subunit localization	562	53.1639
An08g08750		Carboxypeptidase Y; expression repressed by tunicamycin and DTT	1442	53.0395
An15g05840		Has domain(s) with predicted DNA-binding transcription factor activity, RNA polymerase II-specific, zinc ion binding activity, role in regulation of transcription, DNA-templated and nucleus localization	2538	53.0301
An02g11570		Ortholog(s) have structural constituent of ribosome activity and mitochondrial large ribosomal subunit, mitochondrion localization	642	52.9637
An13g02220		Ortholog of Aspergillus kawachii : Aspka1_0177110	727	52.8718
An09g03290		Ortholog of A. oryzae RIB40 : AO090701000638, Aspergillus wentii : Aspwe1_0113100, Aspergillus versicolor : Aspve1_0026458 and Aspergillus clavatus NRRL 1 : ACLA_093830	936	52.7044
An05g02250		Ortholog of A. nidulans FGSC A4 : AN3258, A. fumigatus Af293 : Afu8g07090, A. oryzae RIB40 : AO090001000070, Neosartorya fischeri NRRL 181 : NFIA_099870 and Aspergillus clavatus NRRL 1 : ACLA_017870	750	52.6843
An09g00950		Putative aminopeptidase; acid protease; expression induced by tunicamycin and DTT	1522	52.6747
An16g02960		Has domain(s) with predicted oxidoreductase activity, acting on a sulfur group of donors, oxygen as acceptor, prenylcysteine oxidase activity and role in oxidation-reduction process, prenylcysteine catabolic process	1414	52.5852
An08g03760		Protein of unknown function; expression repressed by tunicamycin and DTT	496	52.3492
An01g09940		Putative citrate synthase	1344	52.3286
An18g05730		Ortholog of A. nidulans FGSC A4 : AN5709, A. fumigatus Af293 : Afu1g06670, A. oryzae RIB40 : AO090001000467, Aspergillus wentii : Aspwe1_0038290 and Aspergillus sydowii : Aspsy1_0056984	1092	52.309
An16g04770		Ortholog(s) have alditol:NADP+ 1-oxidoreductase activity, aldo-keto reductase (NADP) activity, glycerol dehydrogenase [NAD(P)+] activity, mRNA binding, oxidoreductase activity	924	52.2591
An14g00180		Ortholog(s) have protein domain specific binding, ubiquitin protein ligase binding activity	1090	52.1741
An01g13530		Ortholog(s) have GPI-anchor transamidase activity, role in attachment of GPI anchor to protein and GPI-anchor transamidase complex, endoplasmic reticulum membrane localization	986	52.0756
An07g04580		Protein of unknown function	816	51.9485
An11g10950		Protein of unknown function	754	51.8809
An02g10610		Ortholog of A. fumigatus Af293 : Afu3g02430, Aspergillus tubingensis : Asptu1_0074938, Aspergillus brasiliensis : Aspbr1_0038097, Aspbr1_0207697 and Aspergillus flavus NRRL 3357 : AFL2T_08038	1642	51.7253
An07g02650		Protein similar to translation elongation factor 3	2645	51.6806
An14g01070		Ortholog of A. nidulans FGSC A4 : AN7101, A. fumigatus Af293 : Afu4g03820, A. oryzae RIB40 : AO090011000344, Aspergillus wentii : Aspwe1_0115647 and Aspergillus sydowii : Aspsy1_0048914	795	51.6414
An12g10590		Protein of unknown function; expression repressed by tunicamycin and DTT	1240	51.5483
An04g05950		Has domain(s) with predicted structural constituent of ribosome activity, role in translation and ribosome localization	723	51.2956
An07g05290		Ortholog(s) have structural constituent of ribosome activity and mitochondrial large ribosomal subunit, mitochondrial membrane, mitochondrial ribosome localization	922	50.8401
An18g04360	NA	NA	800	50.778
An04g00520		Protein of unknown function	710	50.7681
An15g02650		Protein of unknown function; expression induced by tunicamycin and DTT	408	50.5868
An14g03010		Has domain(s) with predicted DNA-binding transcription factor activity, sequence-specific DNA binding activity and role in regulation of transcription, DNA-templated	1076	50.5565
An17g01965		Ortholog of A. nidulans FGSC A4 : AN8833/llmI, Aspergillus wentii : Aspwe1_0261285, Aspergillus versicolor : Aspve1_0046299 and Aspergillus clavatus NRRL 1 : ACLA_009200	881	50.5434
An09g04080		Ortholog of A. nidulans FGSC A4 : AN2514, A. fumigatus Af293 : Afu3g14280, A. oryzae RIB40 : AO090020000623, Aspergillus wentii : Aspwe1_0049956 and Aspergillus sydowii : Aspsy1_0736673	759	50.5367
An11g10460		Ortholog(s) have role in filamentous growth of a population of unicellular organisms in response to biotic stimulus and growth of unicellular organism as a thread of attached cells, more	1927	50.5113
An15g00940		Putative urease	785	50.3768
An07g06000		Ortholog(s) have RNA binding, aspartate-tRNA ligase activity, role in aspartyl-tRNA aminoacylation and cytoplasm, intracellular, nucleus localization	1370	50.3332
An03g01660	ape3	Vacuolar aminopeptidase Y family secreted protease; expression repressed by tunicamycin and DTT	1648	50.2773
An15g05970		Ortholog of A. nidulans FGSC A4 : AN10270, A. fumigatus Af293 : Afu2g15720, A. oryzae RIB40 : AO090012000253, Neosartorya fischeri NRRL 181 : NFIA_090950 and Aspergillus wentii : Aspwe1_0182342	758	50.2605
An01g07890		Conserved uORF present in the 5 region of the cpcA/An01g07900 gene; uORFs are capable of mediating translational repression of their downstream ORF	144	50.2453
An01g05290		Ortholog(s) have actin filament binding activity	913	50.1705
An04g06950		Has domain(s) with predicted DNA binding, DNA-binding transcription factor activity, sequence-specific DNA binding activity and role in regulation of transcription, DNA-templated	889	50.1021
An01g10950		Ortholog of A. nidulans FGSC A4 : AN11985, A. fumigatus Af293 : Afu3g01210, A. oryzae RIB40 : AO090026000081, Aspergillus wentii : Aspwe1_0103451 and Aspergillus terreus NIH2624 : ATET_07760	623	49.9757
An14g06500		Glycerone kinase	1631	49.9017
An17g02287		Has domain(s) with predicted nucleoside-triphosphate diphosphatase activity and role in nucleoside triphosphate catabolic process	213	49.8197
An01g13950		Has domain(s) with predicted protein dimerization activity	344	49.8085
An16g02595	fig1	Putative low affinity Ca2+ channel family protein	626	49.7167
An02g03720		Ortholog(s) have role in mismatch repair, nucleotide-excision repair	2173	49.5725
An01g07460		Ortholog of A. nidulans FGSC A4 : AN3651, A. fumigatus Af293 : Afu4g12190, Aspergillus wentii : Aspwe1_0055907, Aspergillus sydowii : Aspsy1_0154768 and Aspergillus terreus NIH2624 : ATET_03105	864	49.3906
An17g02170		Ortholog(s) have pseudouridine synthase activity	1306	49.3739
An02g14080		Putative asparaginyl-tRNA synthetase	1394	49.3139
An11g11180		Putative glutamate carboxypeptidase-like protein; repressed by growth on starch and lactate	1362	49.2738
An09g03990		Cytochrome c oxidase subunit I	411	49.2378
An18g00950		Has domain(s) with predicted N-acetyltransferase activity	761	49.1826
An14g00120		Ortholog of Aspergillus tubingensis : Asptu1_0060574	964	49.1258
An12g07020		Ortholog of A. nidulans FGSC A4 : AN7534, A. fumigatus Af293 : Afu1g01380/och4, A. niger CBS 513.88 : An14g07140, Aspergillus versicolor : Aspve1_0085820 and Aspergillus clavatus NRRL 1 : ACLA_033030	974	49.1258
An16g04020		Ortholog(s) have peroxisome matrix targeting signal-1 binding, peroxisome matrix targeting signal-2 binding, protein binding, bridging activity	1045	49.0638
An17g01670		Ortholog(s) have succinate-CoA ligase (ADP-forming) activity, role in succinyl-CoA metabolic process and mitochondrial nucleoid, mitochondrion localization	1099	49.0048
An03g02800		Ortholog of A. nidulans FGSC A4 : AN3606, A. fumigatus Af293 : Afu4g12700, A. oryzae RIB40 : AO090009000298, Aspergillus wentii : Aspwe1_0047287 and Aspergillus sydowii : Aspsy1_0090817	807	48.9826
An02g04660		Ortholog(s) have protein folding chaperone activity, role in mitochondrial respiratory chain complex II assembly and mitochondrial matrix localization	322	48.9543
An01g05150	pglA	6-phosphogluconolactonase	614	48.9463
An14g03950		Ortholog of A. nidulans FGSC A4 : AN4732, A. fumigatus Af293 : Afu5g10730, A. oryzae RIB40 : AO090010000468, Aspergillus wentii : Aspwe1_0439775 and Aspergillus terreus NIH2624 : ATET_07636	675	48.8674
An16g02700		Has domain(s) with predicted DNA binding, DNA-binding transcription factor activity, RNA polymerase II-specific, zinc ion binding activity and role in regulation of transcription, DNA-templated, transcription, DNA-templated	2042	48.6162
An13g00940		Has domain(s) with predicted catalytic activity and role in metabolic process	898	48.5113
An01g06670		Putative peptidyl-prolyl isomerase; expression enhanced by maltose	379	48.4979
An16g06840	NA	NA	590	48.4858
An02g02190		Ortholog(s) have role in chronological cell aging, hyphal growth, mitochondrial fission, peroxisome fission, peroxisome organization and mitochondrial outer membrane, peroxisome localization	485	48.4646
An01g10730		Ortholog(s) have role in regulation of ergosterol biosynthetic process and endoplasmic reticulum localization	628	48.3715
An11g09780		PAPS reductase	749	48.3581
An08g04070		Ortholog(s) have mitochondrion targeting sequence binding, protein transmembrane transporter activity	694	48.2726
An02g05620		Has domain(s) with predicted identical protein binding, serine-type endopeptidase activity and role in negative regulation of catalytic activity	300	48.2519
An17g00880		Ortholog(s) have phosphatase activity	1275	48.2305
An12g03790		Protein of unknown function	765	48.221
An01g13920		Adenylosuccinate synthetase	1141	48.2176
An09g02240	nag1	N-Acetyl-beta-glucosaminidase	1365	48.022
An07g04430		Has domain(s) with predicted transmembrane transporter activity, role in transmembrane transport and integral component of membrane, membrane localization	1263	48.0041
An12g06910		Ortholog of Aspergillus acidus : Aspfo1_0130399	319	47.9276
An12g04860		Cytoplasmic ribosomal protein of the large subunit L30	436	47.9175
An01g00390		Protein of unknown function	791	47.8296
An07g09540		Ortholog of A. nidulans FGSC A4 : AN5163, A. fumigatus Af293 : Afu1g06970, A. oryzae RIB40 : AO090012000949, Aspergillus wentii : Aspwe1_0519616 and Aspergillus sydowii : Aspsy1_0047663	1750	47.8149
An14g02990		Ortholog of A. nidulans FGSC A4 : AN3190, A. fumigatus Af293 : Afu4g02920, A. oryzae RIB40 : AO090001000192, Aspergillus wentii : Aspwe1_0061505 and Aspergillus sydowii : Aspsy1_1159424	1100	47.814
An15g00040		Protein of unknown function	755	47.7793
An02g03960		Ortholog of Aspergillus wentii : Aspwe1_0117760, Aspergillus versicolor : Aspve1_0052429, Aspergillus clavatus NRRL 1 : ACLA_070800 and Aspergillus niger ATCC 1015 : 173794-mRNA	440	47.7003
An09g02710		Has domain(s) with predicted cofactor binding, dihydrolipoyllysine-residue (2-methylpropanoyl)transferase activity, transferase activity, transferring acyl groups activity and role in fatty-acyl-CoA biosynthetic process, metabolic process	1215	47.684
An08g06560		Ortholog(s) have spermidine synthase activity, role in pantothenate biosynthetic process, spermidine biosynthetic process and extracellular region localization	1097	47.6511
An15g07550		Ortholog(s) have role in response to amino acid	1088	47.6492
An01g03810		Has domain(s) with predicted catalytic activity	682	47.5935
An08g10310		Ortholog(s) have ubiquitin conjugating enzyme activity, ubiquitin protein ligase activity	512	47.5188
An18g03310		Ortholog(s) have DNA-(apurinic or apyrimidinic site) endonuclease activity, protein kinase A catalytic subunit binding, structural constituent of ribosome activity	950	47.4654
An11g06170		Ortholog of S. cerevisiae : YGL159W, A. nidulans FGSC A4 : AN1730/prnX, A. fumigatus Af293 : Afu6g08780, Aspergillus wentii : Aspwe1_0120960 and Aspergillus sydowii : Aspsy1_0038783	778	47.4479
An02g01770		Has domain(s) with predicted arginyltransferase activity and role in protein arginylation	1726	47.423
An07g03610		Ortholog of A. nidulans FGSC A4 : AN9482, A. fumigatus Af293 : Afu5g09370, A. oryzae RIB40 : AO090020000554, Aspergillus wentii : Aspwe1_0048231 and Aspergillus sydowii : Aspsy1_0035062	438	47.403
An18g01590		Mitochondrial carnitine acetyltransferase; induced by fenpropimorph	1571	47.2955
An11g09380		Ortholog(s) have deoxyhypusine monooxygenase activity	808	47.2901
An08g08410		Protein of unknown function	1477	47.1793
An04g01780		COPII vesicle component; expression enhanced by maltose	620	47.1299
An17g00700		Ortholog of A. nidulans FGSC A4 : AN2234, A. fumigatus Af293 : Afu5g07265, A. oryzae RIB40 : AO090701000229, Aspergillus wentii : Aspwe1_0035000 and Aspergillus sydowii : Aspsy1_0039713	1438	47.0878
An16g03740	pkaR	Regulatory subunit of the cAPM-dependent protein kinase; highly expressed in dormant conidia	908	46.9085
An12g07710		Ortholog(s) have protein kinase activity, protein serine/threonine kinase activity	1520	46.8197
An04g07020		Ortholog(s) have Golgi cisterna, endosome localization	914	46.7644
An11g06900		Has domain(s) with predicted acid-amino acid ligase activity	818	46.761
An03g06770		Ortholog of Aspergillus wentii : Aspwe1_0296908, Aspergillus versicolor : Aspve1_0203928, Aspergillus niger ATCC 1015 : 44628-mRNA and Aspergillus sydowii : Aspsy1_0061979	1129	46.6303
An09g00570		Ortholog of A. nidulans FGSC A4 : AN10896, A. fumigatus Af293 : Afu1g11040, A. niger CBS 513.88 : An09g03860, A. oryzae RIB40 : AO090113000167 and Aspergillus wentii : Aspwe1_0137373, Aspwe1_0169359	612	46.5772
An16g05090	ssc1	Putative mitochondrial heat shock protein; induced by growth on starch and lactate	1642	46.4749
An06g02550		Has domain(s) with predicted ATP binding, ATPase activity, ATPase-coupled transmembrane transporter activity, nucleoside-triphosphatase activity, nucleotide binding activity and role in transmembrane transport	3753	46.3434
An08g10670		Ortholog(s) have MAP kinase activity	882	46.3147
An01g04630		F1F0-ATPase complex subunit	951	46.2135
An02g13920		Ortholog(s) have NEDD8-specific protease activity, thiol-dependent ubiquitin-specific protease activity and role in protein deneddylation	603	46.1674
An07g03430		Ortholog of A. nidulans FGSC A4 : AN11123/pom34, A. oryzae RIB40 : AO090020000578, Neosartorya fischeri NRRL 181 : NFIA_077800 and Aspergillus wentii : Aspwe1_0035338	688	46.1462
An04g03610		Ortholog of A. nidulans FGSC A4 : AN1654, A. fumigatus Af293 : Afu4g08750, Aspergillus wentii : Aspwe1_0034423, Aspergillus sydowii : Aspsy1_0084030 and Aspergillus carbonarius ITEM 5010 : Acar5010_205270	471	46.1272
An02g07130		Has domain(s) with predicted structural constituent of ribosome activity, role in translation and ribosome localization	686	46.1089
An16g02440		Ortholog of A. nidulans FGSC A4 : AN3023, A. fumigatus Af293 : Afu3g08870, A. oryzae RIB40 : AO090005001347, Neosartorya fischeri NRRL 181 : NFIA_068250 and Aspergillus wentii : Aspwe1_0041800	1252	45.9451
An13g01190		Ortholog(s) have NEDD8-specific protease activity, SUMO-specific isopeptidase activity and role in asexual sporulation resulting in formation of a cellular spore, protein deneddylation, protein desumoylation, response to light stimulus	882	45.9369
An11g06910		Protein of unknown function	775	45.8207
An15g05750		Has domain(s) with predicted inositol phosphoceramide synthase regulator activity and role in inositol phosphoceramide metabolic process	1054	45.8145
An07g09530	pda1	Alpha subunit E1 of the pyruvate dehydrogenase complex; induced by growth on starch and lactate	1022	45.7952
An04g06090		Geranylgeranyltransferase alpha subunit; expression enhanced by maltose	861	45.5869
An09g01050		Protein involved in the 19749177removal of oxidized membrane phospholipids	854	45.5562
An09g06460		Has domain(s) with predicted protein phosphatase inhibitor activity and role in regulation of phosphoprotein phosphatase activity, regulation of signal transduction	727	45.5559
An12g03770		Ortholog of A. niger CBS 513.88 : An12g03780, An12g03760, Aspergillus wentii : Aspwe1_0168652 and Aspergillus niger ATCC 1015 : 54032-mRNA, 54033-mRNA, 54034-mRNA	1461	45.5072
An14g06300		Ortholog(s) have structural constituent of ribosome activity and mitochondrial large ribosomal subunit, mitochondrion localization	682	45.5047
An08g10020		Ortholog(s) have hypoxanthine DNA N-glycosylase activity, oxanine DNA N-glycosylase activity, uracil DNA N-glycosylase activity, xanthine DNA N-glycosylase activity	739	45.4602
An04g02260		Ortholog(s) have cytosolic large ribosomal subunit, hyphal cell wall, yeast-form cell wall localization	431	45.4139
An07g04790		Ortholog(s) have Prp19 complex, U2-type post-mRNA release spliceosomal complex, post-mRNA release spliceosomal complex, spliceosomal complex localization	664	45.3947
An08g11320		Protein of unknown function	334	45.3767
An15g03570		Ortholog of A. nidulans FGSC A4 : AN7548, A. fumigatus Af293 : Afu2g14740, A. oryzae RIB40 : AO090026000805, Aspergillus wentii : Aspwe1_0118903 and Aspergillus sydowii : Aspsy1_0045980	992	45.3743
An15g01240		Ortholog(s) have nuclear export signal receptor activity, role in protein export from nucleus and nuclear envelope, nuclear periphery, nucleus localization	2373	45.2716
An02g10520		Protein of unknown function	1071	45.2594
An18g06470		Putative DNA-J protein; expression enhanced by maltose	955	45.2039
An18g06780		Ortholog of A. nidulans FGSC A4 : AN5792, A. oryzae RIB40 : AO090003000006, Aspergillus wentii : Aspwe1_0170285, Aspergillus versicolor : Aspve1_0132738 and Aspergillus niger ATCC 1015 : 43055-mRNA	681	45.0613
An16g08670		Ortholog of A. nidulans FGSC A4 : AN1450, A. fumigatus Af293 : Afu8g04380, A. oryzae RIB40 : AO090103000513, Aspergillus wentii : Aspwe1_0639061 and Aspergillus sydowii : Aspsy1_0146031	1057	45.0254
An18g03340		Ortholog of A. nidulans FGSC A4 : AN12324, A. fumigatus Af293 : Afu1g05655, Neosartorya fischeri NRRL 181 : NFIA_019090, Aspergillus wentii : Aspwe1_0037222 and Aspergillus clavatus NRRL 1 : ACLA_028970	931	44.9679
An08g06125		Protein of unknown function	300	44.9672
An04g04510		Has domain(s) with predicted DNA-binding transcription factor activity, sequence-specific DNA binding activity and role in regulation of transcription, DNA-templated	775	44.9468
An02g04300		Ortholog(s) have structural constituent of ribosome activity, role in mitochondrial translation and mitochondrial large ribosomal subunit localization	588	44.8041
An11g03100		Has domain(s) with predicted ATP binding, protein kinase activity, protein serine/threonine kinase activity, transferase activity, transferring phosphorus-containing groups activity and role in protein phosphorylation	736	44.7156
An08g07810		Putative FAD synthase; expression enhanced by maltose	634	44.6833
An02g05700		Translation elongation factor 2; protein levels influenced by presence of starch	2098	44.6697
An04g02010		Ortholog(s) have structural constituent of ribosome activity and mitochondrial ribosome, mitochondrial small ribosomal subunit localization	418	44.6333
An11g08010		Ortholog of A. nidulans FGSC A4 : AN10945, A. fumigatus Af293 : Afu6g09950, A. oryzae RIB40 : AO090001000628, Aspergillus wentii : Aspwe1_0121304 and Aspergillus sydowii : Aspsy1_0058487	686	44.6063
An02g05350		Protein of unknown function	457	44.4155
An16g01310		Acetolactate synthase	1330	44.3473
An12g00770		Ortholog(s) have histone acetyltransferase activity, methylated histone binding activity	871	44.2453
An15g00980		Ortholog(s) have lipid transfer activity	1093	44.228
An16g04660		Ortholog of A. nidulans FGSC A4 : AN5949, A. fumigatus Af293 : Afu2g10330, A. oryzae RIB40 : AO090011000605, Aspergillus wentii : Aspwe1_0175384 and Aspergillus sydowii : Aspsy1_0089318	905	44.1799
An04g02520		Ortholog of A. oryzae RIB40 : AO090023000136, Aspergillus niger ATCC 1015 : 50513-mRNA, Aspergillus terreus NIH2624 : ATET_08825 and Aspergillus carbonarius ITEM 5010 : Acar5010_006841, Acar5010_208666	657	44.1597
An03g01710		Has domain(s) with predicted S-adenosylmethionine-dependent methyltransferase activity	740	44.1191
An08g11780		Has domain(s) with predicted 4-alpha-hydroxytetrahydrobiopterin dehydratase activity and role in tetrahydrobiopterin biosynthetic process	2409	43.7245
An02g06120		Prephenate dehydrogenase (NADP+)	1407	43.6549
An14g03930		Ortholog(s) have role in cellular response to DNA damage stimulus, proteasome assembly, ubiquitin-dependent protein catabolic process and cytoplasm, nucleus localization	468	43.6254
An17g01140		Ortholog(s) have role in ribosomal large subunit assembly, ribosomal subunit export from nucleus and cytoplasm, cytosolic large ribosomal subunit localization	1362	43.5931
An02g02020		Ortholog(s) have proton-transporting ATPase activity, rotational mechanism activity	1366	43.5901
An01g07640		Ortholog(s) have dihydroceramidase activity, role in ceramide biosynthetic process, ceramide catabolic process and endoplasmic reticulum localization	819	43.3991
An02g01710		Ortholog of A. fumigatus Af293 : Afu2g13000, Neosartorya fischeri NRRL 181 : NFIA_088170, Aspergillus kawachii : Aspka1_0172685 and Aspergillus fumigatus A1163 : AFUB_028620	513	43.3865
An01g13940		Has domain(s) with predicted nucleoside-triphosphate diphosphatase activity and cytoplasm localization	584	43.3106
An16g09255		Protein of unknown function	124	43.2668
An16g03000		Putative Gim/prefoldin subunit; induced by caspofungin	458	43.2616
An15g01480		Ortholog(s) have role in maturation of 5.8S rRNA from tricistronic rRNA transcript (SSU-rRNA, 5.8S rRNA, LSU-rRNA), maturation of LSU-rRNA from tricistronic rRNA transcript (SSU-rRNA, 5.8S rRNA and LSU-rRNA), more	771	43.261
An11g03340	aamA	Putative acid alpha-amylase; abundantly expressed on d-maltose; most highly expressed at the periphery of colonies; repressed by xylose and induced by maltose; AmyR dependant regulation	1334	43.1293
An04g06310		Ortholog of A. nidulans FGSC A4 : AN10255, A. fumigatus Af293 : Afu4g10440, A. oryzae RIB40 : AO090003001168, Neosartorya fischeri NRRL 181 : NFIA_105630 and Aspergillus wentii : Aspwe1_0166753	614	42.989
An16g03450		Ortholog(s) have role in cytoplasm to vacuole transport by the Cvt pathway, intra-Golgi vesicle-mediated transport and Golgi transport complex localization	961	42.9714
An01g13620		Glutathione synthetase	1084	42.8059
An04g06920	agdA	Extracellular alpha-glucosidase pro-protein; the mature form of the enzyme is a heterosubunit protein; AmyR dependant induction on maltose	2094	42.8006
An14g02350		Ortholog(s) have extracellular region localization	565	42.7962
An11g08990		Has domain(s) with predicted role in transmembrane transport and integral component of membrane localization	1276	42.7925
An09g04470		Ortholog(s) have calcium-dependent cysteine-type endopeptidase activity, cysteine-type endopeptidase activity	1062	42.7568
An04g06020		Ortholog(s) have 2 iron, 2 sulfur cluster binding, iron-sulfur cluster binding, iron-sulfur transferase activity, role in protein maturation by iron-sulfur cluster transfer and mitochondrion localization	539	42.754
An18g05630		Ortholog(s) have structural constituent of ribosome activity and mitochondrial small ribosomal subunit localization	840	42.7045
An07g08230		Ortholog of A. fumigatus Af293 : Afu6g03390, Aspergillus niger ATCC 1015 : 126931-mRNA, Aspergillus zonatus : Aspzo1_0020462, Aspzo1_0132229 and Aspergillus carbonarius ITEM 5010 : Acar5010_127540	1023	42.6941
An02g10560		Ortholog of Aspergillus wentii : Aspwe1_0174965, Aspergillus niger ATCC 1015 : 37330-mRNA and Aspergillus terreus NIH2624 : ATET_03275	710	42.6892
An13g00500		Protein of unknown function	1684	42.6703
An04g06990		Class I alpha-mannosidase; expression enhanced by maltose	1315	42.623
An09g02840		Ortholog of A. nidulans FGSC A4 : AN1574, AN0682, A. fumigatus Af293 : Afu1g13430, Afu8g05950, A. oryzae RIB40 : AO090012000536 and Aspergillus wentii : Aspwe1_0494153, Aspwe1_0688999	603	42.4048
An07g06570		Ortholog(s) have structural constituent of ribosome activity	312	42.3878
An01g06970	ara1	Glycerol dehydrogenase; D-arabinose 1-dehydrogenase [NAD(P)+]; protein levels influenced by presence of starch	693	42.3854
An16g02570		Ortholog(s) have translation activator activity, role in aerobic respiration, penicillin biosynthetic process, positive regulation of mitochondrial translation and mitochondrial matrix, mitochondrion localization	863	42.3563
An14g05730		Ortholog of A. nidulans FGSC A4 : AN2683, AN5069, A. fumigatus Af293 : Afu5g02860, Afu5g14320, A. niger CBS 513.88 : An09g04830 and A. oryzae RIB40 : AO090102000482, AO090001000197	901	42.3029
An04g09150		Has domain(s) with predicted role in peroxisome fission and integral component of peroxisomal membrane localization	785	42.2995
An01g07140		Has domain(s) with predicted DNA binding, DNA-binding transcription factor activity, RNA polymerase II-specific, zinc ion binding activity and role in regulation of transcription, DNA-templated, transcription, DNA-templated	1710	42.2396
An02g08320		Protein of unknown function	814	42.2231
An16g00100		Protein of unknown function	701	42.1878
An04g09065		Ortholog(s) have structural constituent of ribosome activity and mitochondrial large ribosomal subunit, mitochondrial ribosome localization	544	42.0536
An11g02730		Ortholog of A. nidulans FGSC A4 : AN1941, A. fumigatus Af293 : Afu6g07855, Neosartorya fischeri NRRL 181 : NFIA_053540 and Aspergillus versicolor : Aspve1_0025340	635	42.0175
An02g02810		Ortholog(s) have alpha-glucoside:proton symporter activity, maltose:proton symporter activity, trehalose transmembrane transporter activity and role in disaccharide catabolic process, maltose transport, trehalose transport	1212	42.0143
An13g01120		Has domain(s) with predicted oxidoreductase activity, zinc ion binding activity and role in oxidation-reduction process	735	41.8664
An18g06440		Ortholog(s) have role in endoplasmic reticulum to Golgi vesicle-mediated transport and COPII-coated ER to Golgi transport vesicle, Golgi apparatus, endoplasmic reticulum localization	342	41.835
An07g09970		Ortholog of A. nidulans FGSC A4 : AN5128, A. fumigatus Af293 : Afu1g07430, A. oryzae RIB40 : AO090012000994, Neosartorya fischeri NRRL 181 : NFIA_017320 and Aspergillus wentii : Aspwe1_0069020	359	41.831
An12g02880		Has domain(s) with predicted DNA binding, DNA-binding transcription factor activity, RNA polymerase II-specific, zinc ion binding activity and role in regulation of transcription, DNA-templated, transcription, DNA-templated	1662	41.8142
An15g06920		Ortholog(s) have role in filamentous growth, filamentous growth of a population of unicellular organisms, negative regulation of filamentous growth of a population of unicellular organisms	1075	41.7787
An04g05850		Ortholog(s) have structural constituent of ribosome activity and role in maturation of SSU-rRNA from tricistronic rRNA transcript (SSU-rRNA, 5.8S rRNA, LSU-rRNA)	825	41.7756
An09g03450	rpeA	Ribulose-phosphate 3-epimerase	661	41.6654
An01g14250		Ortholog(s) have role in Golgi inheritance, Golgi localization, endoplasmic reticulum to Golgi vesicle-mediated transport, retrograde vesicle-mediated transport, Golgi to endoplasmic reticulum and COPI vesicle coat localization	1129	41.6467
An09g06420		Has domain(s) with predicted CoA-transferase activity and role in metabolic process	795	41.6435
An12g07810		Ortholog(s) have ubiquitin conjugating enzyme activity, ubiquitin protein ligase activity, ubiquitin-protein transferase activity	410	41.6215
An13g02410		Has domain(s) with predicted metal ion transmembrane transporter activity, role in metal ion transport, transmembrane transport and membrane localization	951	41.6207
An11g07020		Protein of unknown function; expression repressed by tunicamycin and DTT	558	41.527
An18g03870		Ortholog of A. nidulans FGSC A4 : AN4206, A. fumigatus Af293 : Afu1g06020, Aspergillus wentii : Aspwe1_0026071, Aspergillus sydowii : Aspsy1_0059171 and Aspergillus terreus NIH2624 : ATET_03025	1122	41.5084
An14g04740		Ortholog of A. nidulans FGSC A4 : AN6891, A. fumigatus Af293 : Afu5g13330, A. oryzae RIB40 : AO090120000478, Aspergillus wentii : Aspwe1_0050596 and Aspergillus sydowii : Aspsy1_0085527	753	41.4854
An02g07710	gaaA	Putative d-galacturonic acid reductase; predicted role in pectin degradation	958	41.4441
An04g08460		Ortholog of A. nidulans FGSC A4 : AN7052, A. fumigatus Af293 : Afu4g09510, Afu4g03945, A. niger CBS 513.88 : An14g00940, An07g04990 and A. oryzae RIB40 : AO090023000583, AO090011000324, AO090005000036	623	41.3951
An08g04490	protA	Secreted lysosomal Pro-Xaa carboxypeptidase	1368	41.34
An02g13210		Has domain(s) with predicted nucleic acid binding, nucleotide binding, zinc ion binding activity and intracellular localization	1660	41.2438
An13g02540		Putative glutathione S-transferase; highly expressed in dormant conidia	581	41.2209
An03g06850		Ortholog(s) have role in establishment of cell polarity, ribosome biogenesis and nucleolus localization	313	41.2085
An14g00060		NADH-ubiquinone oxidoreductase	531	41.1482
An08g06040		Protein of unknown function	882	41.0486
An11g10910		Nicotinate mononucleotide pyrophosphorylase	689	41.0401
An04g04890		Glycerol kinase with a predicted role in glycerol metabolism	1217	40.8783
An01g12170		Putative Zn-containing alcohol dehydrogenase; repressed by growth on starch and lactate	787	40.8226
An17g01660		Ortholog(s) have histone acetyltransferase activity	1138	40.8002
An16g03500		Ortholog of A. nidulans FGSC A4 : AN5004, Aspergillus wentii : Aspwe1_0024962, Aspergillus clavatus NRRL 1 : ACLA_037640 and Aspergillus niger ATCC 1015 : 41113-mRNA	337	40.7549
An18g01670	pfkA	6-phosphofructo-1-kinase; posttranslationally processed; the native enzyme is first cleaved to an inactive fragment that regains its activity after phosphorylation	1566	40.7309
An18g00170		Ortholog of A. nidulans FGSC A4 : AN4848, A. oryzae RIB40 : AO090003001413, Aspergillus wentii : Aspwe1_0044821, Aspwe1_0142113 and Aspergillus versicolor : Aspve1_0178335	880	40.6592
An02g13910		Ortholog(s) have RNA 7-methylguanosine cap binding, exoribonuclease activator activity, hydrolase activity, acting on acid anhydrides, in phosphorus-containing anhydrides, m7G(5)pppN diphosphatase activity	735	40.634
An01g11360		Has domain(s) with predicted aminopeptidase activity, metalloexopeptidase activity and role in cellular process, proteolysis	1079	40.6237
An04g03900		Protein of unknown function	419	40.5987
An18g00960		Has domain(s) with predicted amino acid transmembrane transporter activity, role in amino acid transmembrane transport and membrane localization	1375	40.4974
An08g01610		Ortholog(s) have ATPase activity and cytoplasm localization	1040	40.4677
An15g00750		Protein similar to elongation factor 1-gamma 1	300	40.4135
An06g01820		Ortholog(s) have structural constituent of ribosome activity, role in mitochondrial translation and mitochondrial large ribosomal subunit, mitochondrion localization	534	40.4001
An09g01100		Ortholog(s) have intracellular localization	653	40.2862
An07g07070		Protein of unknown function	294	40.2852
An12g01350		Ortholog(s) have small ribosomal subunit rRNA binding, structural constituent of ribosome activity and role in positive regulation of translational fidelity, rRNA export from nucleus	646	40.1648
An02g13570		Has domain(s) with predicted phosphatidylinositol N-acetylglucosaminyltransferase activity, role in GPI anchor biosynthetic process and integral component of membrane localization	985	40.1632
An02g05880		NADH-ubiquinone oxidoreductase; respiratory-chain NADH dehydrogenase	523	40.0904
An01g03560		Ortholog(s) have DNA binding, bending, double-stranded DNA binding, four-way junction DNA binding, sequence-specific DNA binding activity	1016	39.9723
An02g12090		Ortholog of A. nidulans FGSC A4 : AN2979, A. fumigatus Af293 : Afu3g08450, A. oryzae RIB40 : AO090005001429, Aspergillus wentii : Aspwe1_0551961 and Aspergillus sydowii : Aspsy1_0056256	912	39.8047
An04g04480		Has domain(s) with predicted oxidoreductase activity, zinc ion binding activity and role in oxidation-reduction process	642	39.6076
An12g01950		Ortholog of A. nidulans FGSC A4 : AN3371, A. fumigatus Af293 : Afu7g01290, A. oryzae RIB40 : AO090010000194, Aspergillus wentii : Aspwe1_0173909 and Aspergillus sydowii : Aspsy1_0147256	1143	39.5365
An12g09780		Protein of unknown function	758	39.4144
An18g03300		Ortholog(s) have phenylalanine-tRNA ligase activity, role in cellular response to drug, phenylalanyl-tRNA aminoacylation and phenylalanine-tRNA ligase complex localization	1395	39.3965
An01g11380		Ortholog of A. nidulans FGSC A4 : AN9322, A. fumigatus Af293 : Afu4g03450, A. niger CBS 513.88 : An14g02560, A. oryzae RIB40 : AO090011000213 and Aspergillus wentii : Aspwe1_0115377	627	39.3668
An04g01190		Ortholog(s) have NAD transmembrane transporter activity, pyruvate secondary active transmembrane transporter activity, role in NAD transmembrane transport, mitochondrial pyruvate transmembrane transport and mitochondrion localization	798	39.3475
An03g04190		Ortholog(s) have spore wall localization	1011	39.2198
An02g10350		Protein similar to farnesyl-pyrophosphate synthase	679	39.1304
An18g01170		Ortholog(s) have role in apoptotic process, apoptotic signaling pathway, asexual sporulation, cellular response to DNA damage stimulus and nucleus localization	1355	39.1145
An01g02110		Ortholog of A. nidulans FGSC A4 : AN0073, A. fumigatus Af293 : Afu5g12302, A. oryzae RIB40 : AO090120000347, Aspergillus wentii : Aspwe1_0170763 and Aspergillus sydowii : Aspsy1_0195064	1312	39.0745
An12g03940		Ortholog(s) have glutaminase activity and role in de novo pyridoxal 5-phosphate biosynthetic process, negative regulation of apoptotic process, pyridoxine biosynthetic process, vitamin B6 biosynthetic process	542	39.0616
An05g00440		Has domain(s) with predicted magnesium ion transmembrane transporter activity, role in lipid metabolic process, magnesium ion transport, metabolic process and integral component of membrane localization	3305	38.9293
An08g11680		Has domain(s) with predicted oxidoreductase activity and role in metabolic process	571	38.9117
An07g02540		Ortholog(s) have carboxylic acid transmembrane transporter activity, dicarboxylic acid transmembrane transporter activity, secondary active monocarboxylate transmembrane transporter activity, selenite:proton symporter activity	1014	38.9107
An09g06070		Ortholog(s) have SAGA complex, transcription factor TFIID complex localization	1018	38.8772
An05g00770		Putative ubiquitin-like protein; repressed by growth on starch and lactate	362	38.8486
An07g07080		Protein of unknown function	585	38.7894
An02g14340		Ortholog(s) have RNA binding, U3 snoRNA binding, U4 snRNA binding activity	297	38.703
An04g04270		Ortholog of A. nidulans FGSC A4 : AN8351, AN1611, A. fumigatus Af293 : Afu4g09220, A. oryzae RIB40 : AO090023000614 and Aspergillus wentii : Aspwe1_0101354	1142	38.3793
An15g03540		Putative AAA-ATPase	1134	38.312
An06g00860		Ortholog of A. oryzae RIB40 : AO090138000053, Aspergillus wentii : Aspwe1_0109942, Aspergillus versicolor : Aspve1_0029582, Aspve1_0086493 and Aspergillus clavatus NRRL 1 : ACLA_042390	582	38.2332
An14g04520		Ortholog of Aspergillus tubingensis : Asptu1_0060229, Aspergillus brasiliensis : Aspbr1_0050124, Aspergillus kawachii : Aspka1_0180982 and Aspergillus acidus : Aspfo1_0048659	1686	38.1762
An08g04040		Has domain(s) with predicted transmembrane transporter activity, role in transmembrane transport and integral component of membrane, membrane localization	1051	38.0658
An02g11627		Ortholog of Aspergillus tubingensis : Asptu1_0118097, Aspergillus brasiliensis : Aspbr1_0086164 and Aspergillus acidus : Aspfo1_0057909	143	38.046
An04g04060	ccp1	Cytochrome-c peroxidase precursor	695	38.0275
An18g04550		Ortholog of A. nidulans FGSC A4 : AN0159, A. fumigatus Af293 : Afu5g11420, A. oryzae RIB40 : AO090026000696, Aspergillus wentii : Aspwe1_0442980 and Aspergillus sydowii : Aspsy1_0054986	1354	38.02
An03g01280		Has domain(s) with predicted ATP binding, aminoacyl-tRNA ligase activity, glutamine-tRNA ligase activity, role in glutaminyl-tRNA aminoacylation, tRNA aminoacylation, tRNA aminoacylation for protein translation and cytoplasm localization	1189	37.8473
An14g00370		Ortholog(s) have cell surface, cytosolic large ribosomal subunit localization	702	37.8271
An07g03020		Ortholog(s) have N(6)-L-threonylcarbamoyladenine synthase activity and role in mitochondrial tRNA threonylcarbamoyladenosine modification, tRNA threonylcarbamoyladenosine modification	870	37.7908
An11g04630		Ortholog(s) have nuclear periphery localization	2695	37.5813
An12g00480		UDP-N-acetylglucosamine pyrophosphorylase	977	37.4908
An04g02040		Ortholog of A. nidulans FGSC A4 : AN10560, A. fumigatus Af293 : Afu4g07670, A. oryzae RIB40 : AO090023000808, Aspergillus wentii : Aspwe1_0034566 and Aspergillus sydowii : Aspsy1_0051349	1584	37.4607
An09g03090		Protein of unknown function	804	37.3912
An18g04340		Uridine hydrolase	828	37.3644
An07g08533		Ortholog of Aspergillus tubingensis : Asptu1_0057986 and Aspergillus brasiliensis : Aspbr1_0054665	310	37.3482
An17g01080		Ortholog of A. nidulans FGSC A4 : AN2257, A. fumigatus Af293 : Afu3g14870, Afu5g06570, Neosartorya fischeri NRRL 181 : NFIA_036550, NFIA_062380 and Aspergillus wentii : Aspwe1_0045706, Aspwe1_0047992	1446	37.3209
An04g00750		Ortholog of A. nidulans FGSC A4 : AN4352, A. fumigatus Af293 : Afu4g06390, Aspergillus wentii : Aspwe1_0100602, Aspergillus sydowii : Aspsy1_0163330 and Aspergillus terreus NIH2624 : ATET_05584	851	37.3209
An11g03490		Has domain(s) with predicted oxidoreductase activity and role in metabolic process	577	37.2532
An08g01500		Ortholog of A. nidulans FGSC A4 : AN1293, A. fumigatus Af293 : Afu1g09720, A. oryzae RIB40 : AO090012000872, Aspergillus wentii : Aspwe1_0103011 and Aspergillus sydowii : Aspsy1_0025452	490	37.2478
An14g06160		Ortholog of A. niger CBS 513.88 : An15g04010, An08g09580, Aspergillus flavus NRRL 3357 : AFL2T_06082, Neosartorya fischeri NRRL 181 : NFIA_004710 and Aspergillus kawachii : Aspka1_0181663	581	37.2478
An01g14140		Phosphatidylinositol synthase	565	37.1547
An04g04280		Ortholog of A. nidulans FGSC A4 : AN1608, A. fumigatus Af293 : Afu4g09250, A. oryzae RIB40 : AO090023000611 and Aspergillus wentii : Aspwe1_0025307, Aspwe1_0043468, Aspwe1_0045458	350	37.0011
An08g00880		Ortholog(s) have sequence-specific DNA binding activity and role in cytoplasmic translational initiation	910	36.9165
An16g02070		Ortholog of A. nidulans FGSC A4 : AN3015, A. fumigatus Af293 : Afu3g08790, A. oryzae RIB40 : AO090005001386, Aspergillus wentii : Aspwe1_0029113 and Aspergillus sydowii : Aspsy1_0056248	688	36.8241
An09g04120		Ortholog(s) have anaphase-promoting complex binding, protein-containing complex binding activity	599	36.7418
An17g02130		Ortholog(s) have G-protein beta/gamma-subunit complex binding activity and role in positive regulation of transcription from RNA polymerase II promoter by pheromones, protein folding	419	36.7004
An07g03730		Ortholog of A. nidulans FGSC A4 : AN4729, A. fumigatus Af293 : Afu5g09280, A. niger CBS 513.88 : An14g07350, An14g07330 and A. oryzae RIB40 : AO090023000535, AO090020000531	819	36.6732
An08g02180		Ortholog(s) have extracellular region localization	643	36.6587
An15g01430		Ortholog of A. fumigatus Af293 : Afu6g04200, Aspergillus brasiliensis : Aspbr1_0046403, Aspergillus fumigatus A1163 : AFUB_094100 and Aspergillus zonatus : Aspzo1_0169122	458	36.6018
An04g03620		Ortholog(s) have 3-deoxy-7-phosphoheptulonate synthase activity	960	36.5094
An07g05620		Ortholog(s) have RNA binding, RNA polymerase II C-terminal domain phosphoserine binding activity	1151	36.4922
An03g06830		Has domain(s) with predicted translation initiation factor activity and role in translational initiation	528	36.4088
An12g07760		Ortholog(s) have palmitoyl-(protein) hydrolase activity and role in protein deacylation	597	36.3398
An08g02770		Has domain(s) with predicted proton-transporting ATPase activity, rotational mechanism activity, role in proton transmembrane transport and vacuolar proton-transporting V-type ATPase, V1 domain localization	889	36.3184
An07g01780		Has domain(s) with predicted transferase activity, transferring hexosyl groups activity and integral component of membrane localization	488	36.3175
An04g05670		Ortholog(s) have role in cellular response to drug, filamentous growth, late endosome to vacuole transport via multivesicular body sorting pathway and fungal-type vacuole membrane localization	435	36.3088
An07g06840	lpd1	Precursor of dihydrolipoamide dehydrogenase	1018	36.2739
An05g02270		Has domain(s) with predicted role in transmembrane transport and integral component of membrane localization	956	36.2493
An08g05160		Ortholog(s) have delta12-fatty acid dehydrogenase activity and role in asexual sporulation resulting in formation of a cellular spore, fatty acid biosynthetic process, unsaturated fatty acid biosynthetic process	830	36.2258
An04g05130		Aspartate transaminase; phenylalanine:alphaketoglutarate aminotransferase	1041	36.1454
An04g08090		Ortholog(s) have 3-dehydroshikimate dehydratase activity and role in quinate catabolic process	568	36.0883
An08g01090		Protein with similarity to Ada Histone acetyltransferase complex component Ahc1p of S. cerevisiae	1184	36.0012
An16g00960		Has domain(s) with predicted actin filament binding activity	661	35.9822
An08g01510		Has domain(s) with predicted catalytic activity and membrane localization	723	35.8989
An18g00820		Has domain(s) with predicted O-methyltransferase activity	441	35.8718
An12g10560		Ortholog(s) have RNA polymerase II activating transcription factor binding, kinase inhibitor activity	733	35.8655
An01g08280		Has domain(s) with predicted methyltransferase activity and role in metabolic process	673	35.8111
An11g11120		Ortholog of A. nidulans FGSC A4 : AN3452, A. fumigatus Af293 : Afu3g05520, A. oryzae RIB40 : AO090020000024, Aspergillus wentii : Aspwe1_0173714 and Aspergillus sydowii : Aspsy1_0056880	912	35.7485
An15g04550		Putative xylanase	462	35.7146
An11g03060		Salicylate hydroxylase with a predicted role in salicylic acid degradation	799	35.7025
An01g10860		Has domain(s) with predicted role in endosome transport via multivesicular body sorting pathway and ESCRT I complex localization	403	35.6906
An12g03900		DNA-directed RNA polymerase	347	35.6798
An01g12430		Has domain(s) with predicted role in intracellular protein transport and intracellular localization	1115	35.6161
An13g00750		Ortholog of A. nidulans FGSC A4 : AN5687, A. fumigatus Af293 : Afu7g04200, A. oryzae RIB40 : AO090005001653, Aspergillus wentii : Aspwe1_0038498 and Aspergillus sydowii : Aspsy1_0030277	780	35.4994
An12g10960		Protein of unknown function	175	35.4741
An07g07870		Ortholog of A. nidulans FGSC A4 : AN4491, A. fumigatus Af293 : Afu2g03410, A. oryzae RIB40 : AO090120000246, Aspergillus wentii : Aspwe1_0040682 and Aspergillus sydowii : Aspsy1_0555946	528	35.4517
An02g05610		Ortholog(s) have protein kinase activity, pyruvate dehydrogenase (acetyl-transferring) kinase activity and role in carbon utilization, cellular protein-containing complex assembly, peptidyl-serine phosphorylation, protein phosphorylation	829	35.4314
An03g04870		Has domain(s) with predicted oxidoreductase activity, zinc ion binding activity and role in oxidation-reduction process	575	35.3716
An08g09000	dsk2	Putative ubiquitin like protein; expression induced by tunicamycin and DTT	816	35.3011
An12g09560		Ortholog(s) have catalytic activity and role in sterigmatocystin biosynthetic process	935	35.1815
An02g05890	epsA	Putative thioredoxin domain protein; expression enhanced by maltose	1315	35.1769
An12g07530		Has domain(s) with predicted ferrous iron binding, oxidoreductase activity and role in cellular aromatic compound metabolic process	746	35.1288
An11g10570		Protein of unknown function	280	35.1256
An04g08330		Orotate phosphoribosyltransferase	267	35.08
An12g07630		2-methylisocitrate lyase	1080	35.0415
An08g09960		Has domain(s) with predicted ATP binding, protein kinase activity, transferase activity, transferring phosphorus-containing groups activity and role in protein phosphorylation	635	35.0146
An07g09780		Has domain(s) with predicted transferase activity, transferring phosphorus-containing groups activity	686	34.9588
An01g14840		Ortholog of A. nidulans FGSC A4 : AN2942, AN10320, AN7130 and A. fumigatus Af293 : Afu3g15110, Afu4g08715	450	34.9562
An08g01960		Adenosylhomocysteinase	887	34.8971
An11g01910		Ortholog of Aspergillus tubingensis : Asptu1_0056669	607	34.8239
An04g00490		Ortholog(s) have protein kinase regulator activity, protein serine/threonine kinase inhibitor activity	595	34.7919
An01g09730		Ortholog of Aspergillus tubingensis : Asptu1_0039500, Aspergillus brasiliensis : Aspbr1_0039715, Aspergillus kawachii : Aspka1_0172259 and Aspergillus acidus : Aspfo1_0039428	973	34.7674
An02g06980		Ortholog(s) have endoribonuclease activity, role in RNA catabolic process, apoptotic process, cell morphogenesis and cytosol, extracellular region, fungal-type vacuole, vacuole localization	681	34.7595
An01g07430		Ortholog(s) have structural constituent of ribosome activity, role in mitochondrial translation and mitochondrial large ribosomal subunit, mitochondrial ribosome localization	733	34.7472
An01g07100		Ortholog of A. nidulans FGSC A4 : AN10695	543	34.7419
An11g10870		Has domain(s) with predicted DNA-binding transcription factor activity, RNA polymerase II-specific, zinc ion binding activity, role in regulation of transcription, DNA-templated and nucleus localization	562	34.7392
An06g00640		Ortholog(s) have DNA-binding transcription activator activity, RNA polymerase II-specific, RNA polymerase II proximal promoter sequence-specific DNA binding activity	1371	34.7255
An17g01815		Putative translation initiation factor	560	34.5821
An01g12090		Putative benzonitrilase	646	34.4606
An04g02470		Rab5-like GTPase	511	34.4552
An02g12070		Ortholog(s) have mitochondrion localization	770	34.3826
An18g05790		Has domain(s) with predicted nucleic acid binding, zinc ion binding activity	436	34.3705
An15g00760		Protein of unknown function	368	34.3539
An07g04180		NADH-ubiquinone oxidoreductase; respiratory-chain NADH dehydrogenase	178	34.3381
An01g08980		Conserved ER protein; expression decreased by growth on maltose	414	34.3316
An14g06750		Has domain(s) with predicted 2-oxoglutarate-dependent dioxygenase activity, iron ion binding, oxidoreductase activity and role in oxidation-reduction process	624	34.2896
An11g11320	atg4	Cysteine protease; predicted role in autophagic vacuole assembly	784	34.2884
An09g01030	pdcB	Pyruvate decarboxylase	920	34.174
An01g05840		Protein of unknown function	468	34.1135
An07g05160		Protein of unknown function; expression repressed by tunicamycin and DTT	925	34.1018
An09g06430		Ortholog of A. nidulans FGSC A4 : AN8237, A. fumigatus Af293 : Afu5g03730, A. oryzae RIB40 : AO090102000583, Aspergillus wentii : Aspwe1_0114603 and Aspergillus sydowii : Aspsy1_0161802	581	34.0669
An09g06040		Has domain(s) with predicted protein heterodimerization activity, role in transcription initiation from RNA polymerase II promoter and nucleus localization	589	34.0051
An13g01810		Ortholog(s) have monooxygenase activity and role in sterigmatocystin biosynthetic process	1045	33.9923
An15g00110		Ortholog(s) have FAD transmembrane transporter activity, role in FAD transport and mitochondrion localization	645	33.9814
An04g06380		Mitochondrial aspartate aminotransferase	858	33.9234
An04g01270		Protein of unknown function	405	33.849
An01g06610		Ortholog of Aspergillus tubingensis : Asptu1_0039844, Aspergillus brasiliensis : Aspbr1_0118922, Aspergillus kawachii : Aspka1_0173805 and Aspergillus acidus : Aspfo1_0039768	1152	33.8203
An13g01750	aphA	Extracellular pH 6.0-optimum acid phosphatase	1056	33.7991
An16g09060		Ortholog(s) have betaine-aldehyde dehydrogenase activity	849	33.7767
An04g00830		Has domain(s) with predicted zinc ion binding activity	904	33.7564
An04g00480		Has domain(s) with predicted DNA-binding transcription factor activity, sequence-specific DNA binding activity and role in regulation of transcription, DNA-templated	440	33.6876
An16g03710		Ortholog of A. nidulans FGSC A4 : AN4989, A. fumigatus Af293 : Afu3g09980, Aspergillus sydowii : Aspsy1_0042878 and Aspergillus terreus NIH2624 : ATET_04521	261	33.6003
An02g09740		Ortholog(s) have DNA-binding transcription activator activity, RNA polymerase II-specific, RNA polymerase II proximal promoter sequence-specific DNA binding activity	1673	33.5828
An04g02500		Ortholog(s) have glycylpeptide N-tetradecanoyltransferase activity and role in establishment of cell polarity	881	33.5649
An01g07260		Anthranilate phosphoribosyl transferase	712	33.5525
An16g04500		Ortholog(s) have protein kinase activity, protein serine/threonine kinase activity	683	33.5218
An08g12110		Has domain(s) with predicted ATP binding, protein kinase activity, transferase activity, transferring phosphorus-containing groups activity and role in protein phosphorylation	1203	33.5147
An07g04910		Protein of unknown function	1253	33.3646
An16g02040		Ortholog(s) have sequence-specific DNA binding activity	1269	33.3319
An11g01810		Ortholog of A. nidulans FGSC A4 : AN3935, A. oryzae RIB40 : AO090003000098, Neosartorya fischeri NRRL 181 : NFIA_053920, Aspergillus wentii : Aspwe1_0032581 and Aspergillus versicolor : Aspve1_0664899	337	33.2077
An15g00340		Ortholog(s) have oxidoreductase activity, role in cytochrome c-heme linkage, mitochondrial membrane organization and extrinsic component of mitochondrial inner membrane localization	602	33.1092
An14g06810		Protein of unknown function	476	32.9655
An16g00070		Protein of unknown function; expression induced by tunicamycin and DTT	715	32.9402
An07g07560		Ortholog(s) have L-methionine-(S)-S-oxide reductase activity, peptide-methionine (S)-S-oxide reductase activity, role in L-methionine salvage from methionine sulphoxide, cellular response to oxidative stress and cytoplasm localization	361	32.7896
An01g11900		Ortholog(s) have role in mRNA splicing, via spliceosome and U4/U6 x U5 tri-snRNP complex localization	337	32.7528
An18g03550		Has domain(s) with predicted antiporter activity, bile acid:sodium symporter activity, inorganic anion transmembrane transporter activity, role in sodium ion transport and integral component of membrane, membrane localization	655	32.7005
An18g05440		Has domain(s) with predicted single-stranded telomeric DNA binding activity, role in telomere capping, telomere maintenance via telomere lengthening and CST complex localization	540	32.6833
An11g01780		Protein of unknown function	295	32.646
An08g10530	aco1	Mitochondrial aconitate hydratase	1463	32.5837
An15g00170		Ortholog(s) have protein serine/threonine kinase activity, protein serine/threonine/tyrosine kinase activity, protein tyrosine kinase activity	833	32.5719
An12g10000	gabA	Putative GABA permease; expression repressed by tunicamycin and DTT	1018	32.5665
An11g02310		Protein of unknown function	973	32.5626
An02g02200		Ortholog of Aspergillus acidus : Aspfo1_0055376	1234	32.5062
An14g02010		Has domain(s) with predicted calcium:proton antiporter activity, cation transmembrane transporter activity, role in calcium ion transport, cation transport, transmembrane transport and integral component of membrane localization	1396	32.4497
An13g02590		Has domain(s) with predicted transmembrane transporter activity, role in transmembrane transport and integral component of membrane localization	820	32.4209
An11g02040	gndA	6-phosphogluconate dehydrogenase, decarboxylating; induced by growth on starch and lactate	1051	32.4203
An18g02700		Has domain(s) with predicted electron transfer activity, heme binding, iron ion binding, monooxygenase activity, oxidoreductase activity, acting on paired donors, with incorporation or reduction of molecular oxygen activity	865	32.3758
An12g00150		Protein of unknown function	367	32.3677
An13g02250		Ortholog(s) have extracellular region localization	601	32.3574
An03g04310		Ortholog of A. nidulans FGSC A4 : AN7724, A. oryzae RIB40 : AO090701000727, Neosartorya fischeri NRRL 181 : NFIA_079200, Aspergillus wentii : Aspwe1_0023644 and Aspergillus versicolor : Aspve1_0052931	311	32.3427
An02g09940		Ortholog(s) have mannosylphosphate transferase activity, mannosyltransferase activity	706	32.2926
An14g00410		Ortholog(s) have role in chromatin remodeling, chromatin silencing at telomere, histone exchange and Swr1 complex, nuclear chromosome, telomeric region localization	816	32.2229
An12g10170		Protein of unknown function	324	32.175
An07g06040		Ortholog(s) have G-protein beta/gamma-subunit complex binding, actin binding activity, role in positive regulation of transcription from RNA polymerase II promoter by pheromones, protein folding and cytoplasm localization	457	32.1377
An09g06730		Has domain(s) with predicted role in amino acid transport, transmembrane transport and integral component of membrane, membrane localization	897	31.998
An04g07620		Protein of unknown function	1297	31.9144
An13g00320		Ortholog(s) have role in syncytium formation by plasma membrane fusion	704	31.904
An02g14660		Ortholog(s) have role in maturation of SSU-rRNA from tricistronic rRNA transcript (SSU-rRNA, 5.8S rRNA, LSU-rRNA), rRNA modification and preribosome, small subunit precursor localization	649	31.8776
An18g06230		Ortholog(s) have protein domain specific binding, ubiquitin protein ligase binding activity	701	31.7456
An18g03290		Ortholog(s) have role in asymmetric protein localization to old mitotic spindle pole body, establishment or maintenance of cytoskeleton polarity, negative regulation of septation initiation signaling	1156	31.6801
An03g01120		Aspartate transaminase; phenylalanine:alphaketoglutarate aminotransferase	747	31.6723
An18g06690		Has domain(s) with predicted role in regulation of transcription, DNA-templated	409	31.6558
An09g04580		Has domain(s) with predicted palmitoyl-(protein) hydrolase activity and role in cellular protein modification process	577	31.6524
An16g02140		Ortholog(s) have tRNA (guanine(9)-N(1))-methyltransferase activity, tRNA (guanine) methyltransferase activity and role in tRNA N1-guanine methylation, tRNA methylation	620	31.646
An12g04170		Has domain(s) with predicted metallocarboxypeptidase activity, zinc ion binding activity and role in proteolysis	959	31.5972
An01g13030		Ortholog of A. nidulans FGSC A4 : AN0831, A. fumigatus Af293 : Afu1g14910, A. oryzae RIB40 : AO090005001241, Aspergillus wentii : Aspwe1_0171775 and Aspergillus sydowii : Aspsy1_0139300	833	31.5854
An01g07770		Ortholog of A. nidulans FGSC A4 : AN3671, A. oryzae RIB40 : AO090009000445, Aspergillus wentii : Aspwe1_0178345, Aspergillus sydowii : Aspsy1_0154302 and Aspergillus terreus NIH2624 : ATET_03123	385	31.5174
An02g04900		Endopolygalacturonase	609	31.5127
An14g06090		Ortholog of A. nidulans FGSC A4 : AN6859, A. fumigatus Af293 : Afu5g13070, A. oryzae RIB40 : AO090120000432, Aspergillus wentii : Aspwe1_0107789 and Aspergillus sydowii : Aspsy1_0085559	578	31.3837
An16g03750		Has domain(s) with predicted 2-oxoglutarate-dependent dioxygenase activity, L-ascorbic acid binding, iron ion binding, oxidoreductase activity, acting on paired donors, with incorporation or reduction of molecular oxygen activity	576	31.3551
An08g11040		Has domain(s) with predicted zinc ion binding activity	762	31.3104
An04g05260		Saccharopine dehydrogenase (NADP+, L-glutamate forming)	876	31.3014
An07g09380		Ortholog of A. nidulans FGSC A4 : AN5180, A. fumigatus Af293 : Afu6g07110, Aspergillus wentii : Aspwe1_0110754, Aspergillus sydowii : Aspsy1_0033482 and Aspergillus terreus NIH2624 : ATET_03720	1276	31.2891
An01g12220		UDP-glucose 4-epimerase	476	31.2698
An02g13870		Ortholog(s) have H4 histone acetyltransferase activity, histone acetyltransferase activity, histone acetyltransferase activity (H3-K4 specific), peptide N-acetyltransferase activity	1398	31.2669
An09g06300		Ortholog(s) have oxidoreductase activity, acting on NAD(P)H, heme protein as acceptor activity, role in heme a biosynthetic process, iron-sulfur cluster assembly, ubiquinone biosynthetic process and mitochondrial matrix localization	364	31.2401
An08g10650		COPII complex subunit; expression enhanced by maltose	1405	31.2375
An08g08910		Has domain(s) with predicted electron transfer activity, metal ion binding, molybdenum ion binding, oxidoreductase activity and role in nitrate assimilation, oxidation-reduction process	869	31.1559
An08g03190	tubB	Beta tubulin structural protein	974	31.0655
An16g04350		Ortholog of A. nidulans FGSC A4 : AN4945, A. fumigatus Af293 : Afu3g10420, A. oryzae RIB40 : AO090003000591, Aspergillus wentii : Aspwe1_0049222 and Aspergillus sydowii : Aspsy1_0029595	1037	31.0436
An16g04400		Ortholog(s) have Ran GTPase binding activity, role in nucleocytoplasmic transport, protein import into nucleus and nuclear envelope localization	467	31.0297
An07g02800		Ortholog of A. fumigatus Af293 : Afu7g05400, A. oryzae RIB40 : AO090005000380, Aspergillus wentii : Aspwe1_0286844, Aspergillus sydowii : Aspsy1_0093167 and Aspergillus terreus NIH2624 : ATET_06417	574	30.9821
An01g00460		Protein of unknown function	389	30.9713
An04g07330		Ortholog(s) have structural constituent of ribosome activity and mitochondrial large ribosomal subunit, mitochondrial nucleoid, mitochondrial ribosome localization	338	30.9648
An02g11160		Ortholog of A. nidulans FGSC A4 : AN8051, A. fumigatus Af293 : Afu5g02120, A. oryzae RIB40 : AO090003001306, Aspergillus wentii : Aspwe1_0029924 and Aspergillus sydowii : Aspsy1_0156226	815	30.9029
An08g06490		Protein of unknown function	572	30.9003
An08g11130		Ortholog of Aspergillus tubingensis : Asptu1_0313449, Aspergillus brasiliensis : Aspbr1_0135001, Aspergillus kawachii : Aspka1_0178320 and Aspergillus acidus : Aspfo1_0391417	131	30.8664
An17g00730		Ortholog(s) have mitochondrion localization	505	30.8574
An16g05990		Ortholog of Aspergillus tubingensis : Asptu1_0121567, Aspergillus brasiliensis : Aspbr1_0075122, Aspergillus acidus : Aspfo1_0081016 and Aspergillus wentii : Aspwe1_0174765	310	30.8326
An12g03650		Ortholog of A. nidulans FGSC A4 : AN6161, A. fumigatus Af293 : Afu2g08410/pex8, A. oryzae RIB40 : AO090011000861, Aspergillus wentii : Aspwe1_0031690 and Aspergillus sydowii : Aspsy1_0089578	1072	30.806
An02g08660	ugmA	UDP-galactopyranose mutase, involved in cell wall biosynthesis; induced by growth on starch and lactate	917	30.7691
An08g04420		Ortholog of A. fumigatus Af293 : Afu1g12120, A. oryzae RIB40 : AO090001000333, Aspergillus wentii : Aspwe1_0027928, Aspergillus sydowii : Aspsy1_0038224 and Aspergillus terreus NIH2624 : ATET_00411	1217	30.7274
An07g03890		Ortholog(s) have ubiquitin protein ligase activity, ubiquitin-protein transferase activity	453	30.5444
An03g01750		Has domain(s) with predicted transmembrane transporter activity, role in transmembrane transport and integral component of membrane, membrane localization	750	30.4838
An05g02300	gpi12	Putative ER protein with a predicted role in GPI anchor assembly	466	30.4562
An01g00700		Ortholog(s) have role in heme transmembrane transport and plasma membrane localization	475	30.4216
An04g01210		Ortholog(s) have DNA-3-methyladenine glycosylase activity, alkylbase DNA N-glycosylase activity, damaged DNA binding activity	643	30.4131
An15g02280		Has domain(s) with predicted oxidoreductase activity and role in metabolic process	529	30.3763
An08g08950		Choline sulphatase	862	30.3762
An16g04330	dpm1	ER dolichyl-phosphate beta-d-mannosyltransferase; expression enhanced by maltose; induced by caspofungin	385	30.3501
An01g04040	sarA	Small GTPase of the ARF family, likely a component of COPII coat of transport vesicles; complements S. cerevisiae sar1 mutants	538	30.3473
An12g03600		1-acylglycerol-3-phosphate acyltransferase	745	30.3385
An17g00210		Putative oxidoreductase	635	30.3041
An15g00050		Ortholog(s) have SUMO ligase activity, SUMO transferase activity	954	30.2764
An09g03940	ilv2	Ketol-acid reductoisomerase; induced by growth on starch and lactate	605	30.2043
An09g06140		Ortholog(s) have structural constituent of ribosome activity and mitochondrial large ribosomal subunit, mitochondrial ribosome localization	403	30.203
An08g06400		Ortholog(s) have actin filament binding activity, role in Arp2/3 complex-mediated actin nucleation, endocytosis, spore germination and Arp2/3 protein complex, actin cortical patch localization	655	30.0676
An09g04620		Ortholog of A. nidulans FGSC A4 : AN2492, A. fumigatus Af293 : Afu3g14020, A. oryzae RIB40 : AO090012000726, Aspergillus wentii : Aspwe1_0108589 and Aspergillus sydowii : Aspsy1_0148218	668	30.0381
An11g06420		Ortholog(s) have role in arginine transport and plasma membrane localization	800	29.9957
An08g01950		Ortholog(s) have extracellular region localization	469	29.9772
An11g10810		Ortholog of A. nidulans FGSC A4 : AN3430, A. fumigatus Af293 : Afu3g05790, A. oryzae RIB40 : AO090020000047, Aspergillus wentii : Aspwe1_0029428, Aspwe1_0037899 and Aspergillus sydowii : Aspsy1_0056861	744	29.9539
An13g00280		DNA-directed RNA polymerase	553	29.9499
An18g06540		Has domain(s) with predicted DNA-binding transcription factor activity, RNA polymerase II-specific, zinc ion binding activity, role in regulation of transcription, DNA-templated and nucleus localization	1293	29.9465
An09g06020		Ortholog(s) have protein phosphatase regulator activity, ubiquitin binding activity	596	29.8952
An08g05790		Ortholog(s) have glycogen phosphorylase activity, role in glycogen catabolic process, response to heat and cell surface, cytoplasm, hyphal cell wall localization	1463	29.8936
An08g04260		Protein of unknown function; expression induced by tunicamycin and DTT	639	29.8263
An07g06760		Ortholog(s) have role in maturation of SSU-rRNA from tricistronic rRNA transcript (SSU-rRNA, 5.8S rRNA, LSU-rRNA) and cytosolic small ribosomal subunit, hyphal cell wall, yeast-form cell wall localization	258	29.7906
An01g08490		Ortholog(s) have intracellular localization	763	29.7255
An04g10110		Protein of unknown function	372	29.6918
An11g10160		Has domain(s) with predicted catalytic activity, metal ion binding, phosphoric diester hydrolase activity	488	29.6766
An11g09790	sC	ATP sulfurylase	1089	29.6151
An12g02860		Has domain(s) with predicted role in transmembrane transport and integral component of membrane localization	767	29.6104
An02g01590		Has domain(s) with predicted role in ribosome biogenesis and nucleus localization	1179	29.5808
An02g05820		Protein of unknown function	123	29.5262
An03g03040		Has domain(s) with predicted DNA binding, nucleic acid binding activity	464	29.4513
An15g02340		Argininosuccinate synthase	880	29.4348
An04g04540		Ortholog of A. nidulans FGSC A4 : AN5568, A. fumigatus Af293 : Afu4g11700, A. oryzae RIB40 : AO090003001049, Aspergillus wentii : Aspwe1_0033982 and Aspergillus sydowii : Aspsy1_0879955	948	29.4135
An05g02210		Has domain(s) with predicted proline racemase activity	554	29.4055
An06g00630		Has domain(s) with predicted electron transfer activity, heme binding, iron ion binding, oxidoreductase activity, acting on paired donors, with incorporation or reduction of molecular oxygen activity and role in oxidation-reduction process	682	29.4045
An01g04270		Protein of unknown function	888	29.3488
An07g03210		Ortholog(s) have GTPase activity	492	29.2513
An01g08860		Ortholog(s) have mitochondrion localization	447	29.2443
An14g03330		Ortholog of A. nidulans FGSC A4 : AN10530, A. fumigatus Af293 : Afu2g01690, A. oryzae RIB40 : AO090701000773, Neosartorya fischeri NRRL 181 : NFIA_034010 and Aspergillus wentii : Aspwe1_0157118	631	29.1967
An02g14710		Ortholog of A. nidulans FGSC A4 : AN7443, A. fumigatus Af293 : Afu2g06100, A. oryzae RIB40 : AO090001000726, Aspergillus wentii : Aspwe1_0110234 and Aspergillus sydowii : Aspsy1_0152786	998	29.1784
An08g10930		Fatty-acid synthase	2559	29.1683
An06g01050		Has domain(s) with predicted role in response to stress and integral component of membrane localization	468	29.1545
An08g00400		Has domain(s) with predicted zinc ion binding activity	1063	29.1064
An12g09670		Uracil phosphoribosyltransferase	421	29.0619
An02g04030		Putative exocyst complex subunit; expression enhanced by maltose	919	29.0501
An16g05340		Putative enoyl-(acyl carrier protein) reductase; induced by fenpropimorph	580	29.0015
An09g06650		Core protein II of ubiquinol-cytochrome c reductase	742	28.9959
An04g07010	caM	Calmodulin	404	28.9526
An14g02210		Ortholog of A. nidulans FGSC A4 : AN7184, A. fumigatus Af293 : Afu4g03160, A. oryzae RIB40 : AO090011000095, Aspergillus wentii : Aspwe1_0160101 and Aspergillus sydowii : Aspsy1_0158366	465	28.9394
An15g03720		Has domain(s) with predicted DNA-binding transcription factor activity, RNA polymerase II-specific, zinc ion binding activity, role in regulation of transcription, DNA-templated and nucleus localization	295	28.9351
An14g03140		Ortholog(s) have role in ATP-dependent chromatin remodeling, chromatin remodeling, positive regulation of transcription involved in G1/S transition of mitotic cell cycle, regulation of nucleosome density and Ino80 complex localization	1128	28.9147
An01g11810		Ortholog(s) have phosphoprotein phosphatase activity, protein serine/threonine phosphatase activity	605	28.894
An01g13960		Has domain(s) with predicted carbon-sulfur lyase activity and role in metabolic process	386	28.8274
An03g04560	morA	Morphine dehydrogenase	420	28.7135
An15g06310		Phosphatidylethanolamine N-methyltransferase	1729	28.6017
An04g02650		Ortholog(s) have role in attachment of GPI anchor to protein, conidium formation, hyphal growth, sporocarp development involved in sexual reproduction and GPI-anchor transamidase complex localization	660	28.5717
An11g10140		Ortholog(s) have role in mitochondrial respiratory chain complex I assembly	530	28.5348
An09g06425		Protein of unknown function	256	28.5279
An14g00570		Thymidylate synthase	478	28.4985
An16g07650		Ortholog of A. nidulans FGSC A4 : AN1507, A. fumigatus Af293 : Afu8g05100, A. oryzae RIB40 : AO090005000632, Aspergillus wentii : Aspwe1_0044078 and Aspergillus sydowii : Aspsy1_0028720	294	28.4869
An08g06060		Ortholog(s) have rRNA primary transcript binding, single-stranded telomeric DNA binding, snoRNA binding activity, role in rRNA processing, ribosomal small subunit biogenesis and Mpp10 complex, small-subunit processome localization	434	28.4814
An08g01560		Ortholog(s) have GTPase activator activity	1286	28.453
An04g06700		Protein of unknown function	285	28.4347
An03g03700		Myo-inositol-1	590	28.39
An07g07370		Has domain(s) with predicted DNA binding, chromatin binding activity	548	28.3793
An02g03840		Ortholog of A. nidulans FGSC A4 : AN6198, A. fumigatus Af293 : Afu2g11790, A. oryzae RIB40 : AO090026000463, Aspergillus wentii : Aspwe1_0175598 and Aspergillus sydowii : Aspsy1_0152269	384	28.216
An11g01490		Has domain(s) with predicted DNA-binding transcription factor activity, RNA polymerase II-specific, zinc ion binding activity, role in regulation of transcription, DNA-templated and nucleus localization	304	28.2143
An15g05820		Has domain(s) with predicted catalytic activity, iron-sulfur cluster binding activity	518	28.1978
An16g01680		Has domain(s) with predicted glutathione hydrolase activity and role in glutathione catabolic process	646	28.195
An09g06320	srpA	Signal recognition particle protein	730	28.182
An08g08740		Ortholog(s) have role in endonucleolytic cleavage in ITS1 to separate SSU-rRNA from 5.8S rRNA and LSU-rRNA from tricistronic rRNA transcript (SSU-rRNA, 5.8S rRNA, LSU-rRNA), rRNA export from nucleus and extracellular region localization	391	28.1791
An08g04890		Has domain(s) with predicted DNA binding activity, role in transcription, DNA-templated and nucleus localization	687	28.1742
An01g06380		Has domain(s) with predicted integral component of membrane localization	479	28.009
An14g01570		Ortholog(s) have protein folding chaperone activity, role in mitochondrial respiratory chain complex III assembly and mitochondrial matrix, mitochondrion localization	207	28.0035
An03g05940	gfaB	Putative glutamine:fructose-6-phosphate amidotransferase; induced by caspofungin	1028	27.992
An09g04830		Ortholog of A. nidulans FGSC A4 : AN2683, AN5069, A. fumigatus Af293 : Afu5g02860, Afu5g14320, A. niger CBS 513.88 : An14g05730 and A. oryzae RIB40 : AO090102000482, AO090001000197	620	27.9782
An13g03000		Has domain(s) with predicted electron transfer activity, heme binding, iron ion binding, monooxygenase activity, oxidoreductase activity and acting on paired donors, more	729	27.9407
An11g05070		Protein of unknown function	242	27.8926
An08g00500		Protein of unknown function	501	27.8906
An03g02770		Ortholog(s) have hydrolase activity, acting on ester bonds, phosphoprotein phosphatase activity	774	27.8123
An11g09730		Has domain(s) with predicted catalytic activity, deoxyribose-phosphate aldolase activity, lyase activity, role in deoxyribonucleotide catabolic process and cytoplasm localization	1536	27.7765
An14g00080		Ortholog(s) have Ran guanyl-nucleotide exchange factor activity	774	27.7499
An12g00680		Ortholog of Aspergillus tubingensis : Asptu1_0061284, Aspergillus brasiliensis : Aspbr1_0059672, Aspergillus glaucus : Aspgl1_0126885 and Aspergillus kawachii : Aspka1_0181368	1031	27.7308
An11g02360		Ortholog(s) have chaperonin-containing T-complex localization	976	27.6859
An02g04870		Has domain(s) with predicted phosphatidylinositol phosphate kinase activity and role in phosphatidylinositol metabolic process	472	27.6503
An09g01230		Ortholog of A. nidulans FGSC A4 : AN2535, A. fumigatus Af293 : Afu3g14660, Aspergillus wentii : Aspwe1_0107397, Aspwe1_0171355 and Aspergillus sydowii : Aspsy1_0087029	183	27.6245
An18g00730		Ortholog of A. niger CBS 513.88 : An04g04630, A. oryzae RIB40 : AO090011000122, Aspergillus wentii : Aspwe1_0121345 and Aspergillus niger ATCC 1015 : 190360-mRNA, 54079-mRNA	558	27.5562
An14g04100		Has domain(s) with predicted integral component of membrane localization	229	27.5375
An18g05760		Ortholog(s) have role in apoptotic process, response to endoplasmic reticulum stress	747	27.4603
An11g00800		Has domain(s) with predicted peptidyl-prolyl cis-trans isomerase activity and role in protein folding, protein peptidyl-prolyl isomerization	335	27.4594
An17g01650		Protein of unknown function	390	27.4563
An14g00930		Cystathionine beta-lyase	631	27.4465
An02g05470		NADH-ubiquinone oxidoreductase; respiratory-chain NADH dehydrogenase	669	27.436
An02g01620		Ortholog of A. nidulans FGSC A4 : AN6264, A. fumigatus Af293 : Afu2g12910, A. oryzae RIB40 : AO090026000343, Aspergillus wentii : Aspwe1_0117790 and Aspergillus sydowii : Aspsy1_0151049	1089	27.355
An08g11190	ank1	Ankyrin	1120	27.3378
An01g00170		Ortholog(s) have role in late endosome to vacuole transport via multivesicular body sorting pathway and endosome localization	324	27.3296
An16g02170		Has domain(s) with predicted catalytic activity	675	27.2964
An05g02310		Mannosyl-inositol phosphorylceramide (MIPC) synthase	470	27.2828
An02g06240		F1F0-ATPase complex subunit	392	27.2664
An13g00190		Protein of unknown function	304	27.2632
An05g00110		Ortholog(s) have role in mitochondrial protein processing, mitochondrial proton-transporting ATP synthase complex assembly and extrinsic component of mitochondrial inner membrane, mitochondrial intermembrane space localization	368	27.2599
An08g07040		Ortholog(s) have role in mRNA cis splicing, via spliceosome and U4/U6 x U5 tri-snRNP complex localization	694	27.2535
An11g07720		Ortholog of Aspergillus tubingensis : Asptu1_0044504, Aspergillus brasiliensis : Aspbr1_0050878, Aspergillus kawachii : Aspka1_0176134 and Aspergillus acidus : Aspfo1_0068064	485	27.2374
An02g08280		Ortholog of A. nidulans FGSC A4 : AN5026, A. fumigatus Af293 : Afu3g12140, A. oryzae RIB40 : AO090003000774, Aspergillus wentii : Aspwe1_0169199 and Aspergillus sydowii : Aspsy1_0087531	419	27.1896
An16g02420		Ortholog of A. nidulans FGSC A4 : AN3021, A. fumigatus Af293 : Afu3g08920, A. oryzae RIB40 : AO090005001345, Aspergillus wentii : Aspwe1_0052288 and Aspergillus sydowii : Aspsy1_0147269	1381	27.1662
An02g08850		Putative ubiquitin conjugating enzyme; induced by growth on starch and lactate	268	27.163
An04g05510		Ortholog(s) have role in mitotic spindle pole body duplication, proteasome-mediated ubiquitin-dependent protein catabolic process, regulation of kinase activity, spindle pole body duplication	374	27.1069
An01g02830		Ortholog(s) have thiosulfate sulfurtransferase activity	306	27.1001
An15g02370		Has domain(s) with predicted transcription corepressor activity	649	27.0678
An01g06290	velB	Protein similar to velB	447	27.0545
An08g10720		Ortholog(s) have role in attachment of GPI anchor to protein and GPI-anchor transamidase complex localization	1091	27.054
An01g09500		Has domain(s) with predicted ATP binding, aminoacyl-tRNA ligase activity, threonine-tRNA ligase activity, role in tRNA aminoacylation, tRNA aminoacylation for protein translation, threonyl-tRNA aminoacylation and cytoplasm localization	1032	27.0068
An04g04740		Ortholog of A. nidulans FGSC A4 : AN5572, A. fumigatus Af293 : Afu4g11640, Aspergillus wentii : Aspwe1_0047362, Aspergillus sydowii : Aspsy1_0057118 and Aspergillus terreus NIH2624 : ATET_03912	1322	26.978
An02g03880		Protein of unknown function	281	26.9008
An01g14420		Has domain(s) with predicted catalytic activity	491	26.8195
An02g14005		Ortholog of Aspergillus tubingensis : Asptu1_0600180 and Aspergillus acidus : Aspfo1_0475687	165	26.8087
An04g02460		Ortholog(s) have role in cristae formation, protein import into mitochondrial intermembrane space	873	26.7614
An01g09600		Ortholog of A. oryzae RIB40 : AO090011000137, Aspergillus niger ATCC 1015 : 35780-mRNA, Aspergillus terreus NIH2624 : ATET_06221 and Aspergillus tubingensis : Asptu1_0199108	615	26.7506
An01g06150		3-deoxy-7-phosphoheptulonate synthase	565	26.704
An14g00740		Ortholog of A. nidulans FGSC A4 : AN7031, A. fumigatus Af293 : Afu4g04110, A. oryzae RIB40 : AO090206000082, Aspergillus wentii : Aspwe1_0115140 and Aspergillus sydowii : Aspsy1_0157921	694	26.6953
An03g01740		Ortholog of A. nidulans FGSC A4 : AN2836, A. niger CBS 513.88 : An16g00290, Neosartorya fischeri NRRL 181 : NFIA_004380 and Aspergillus wentii : Aspwe1_0170556	523	26.6949
An01g05140		Ortholog of Aspergillus acidus : Aspfo1_0056120	1223	26.6528
An16g04700		Ortholog(s) have mitochondrial ribosome localization	571	26.6523
An04g06760		Ortholog of Aspergillus brasiliensis : Aspbr1_0132119	467	26.6246
An15g04060		Putative fructose transporter	724	26.6148
An07g10430		Ortholog of S. cerevisiae : FUN19, A. nidulans FGSC A4 : AN5099, A. fumigatus Af293 : Afu1g07750, A. oryzae RIB40 : AO090012001027 and Aspergillus wentii : Aspwe1_0121489	471	26.5915
An14g00220		Ortholog(s) have role in protein insertion into mitochondrial outer membrane and mitochondrial membrane, mitochondrial outer membrane localization	745	26.5907
An08g12250		Putative phospholipase	1414	26.5555
An10g00850		Putative aldehyde dehydrogenase	701	26.5173
An03g04860		Ortholog(s) have role in actin cytoskeleton organization, asexual sporulation resulting in formation of a cellular spore, eisosome assembly and negative regulation of protein phosphorylation, more	327	26.4975
An12g03960		Ortholog(s) have 1-acylglycerol-3-phosphate O-acyltransferase activity, role in glycerophospholipid biosynthetic process and lipid droplet, plasma membrane localization	390	26.4924
An06g01460		Has domain(s) with predicted lipid binding activity and role in ubiquinone biosynthetic process	194	26.4691
An16g05550	riaA	RacA binding protein; protein with strong sequence similarity to the NADPH oxidase regulator NoxR	736	26.4618
An03g03720		Ortholog(s) have damaged DNA binding, zinc ion binding activity	514	26.4256
An04g01170		Ortholog(s) have 2 iron, 2 sulfur cluster binding, iron-sulfur cluster binding, iron-sulfur cluster carrier activity	366	26.4072
An12g05570		Ortholog(s) have L-pipecolate oxidase activity, flavin adenine dinucleotide binding, proline oxidase activity and extracellular region localization	581	26.3673
An04g01427		Protein of unknown function	298	26.355
An18g04650		Ortholog(s) have enzyme regulator activity, guanyl-nucleotide exchange factor activity, translation initiation factor activity	465	26.3225
An11g00550		Ortholog(s) have chaperone binding, unfolded protein binding activity and role in chaperone-mediated protein complex assembly, protein folding, protein import into mitochondrial intermembrane space, protein refolding	263	26.322
An17g01150		Putative acyl-CoA dehydrogenase; induced by fenpropimorph	624	26.0252
An17g02350		Putative GTP-binding protein; induced by caspofungin	304	26.0207
An16g02760		Alpha-fucosidase	1075	25.9518
An12g03910	pinA	Peptidyl-prolyl cis/trans isomerase	295	25.9459
An02g01610		Ortholog(s) have urease activity and role in urea catabolic process, urea metabolic process	392	25.9384
An07g05540		Protein of unknown function	127	25.9086
An09g02920		Has domain(s) with predicted NADP binding, coenzyme binding, oxidoreductase activity, acting on the CH-OH group of donors, NAD or NADP as acceptor, phosphogluconate dehydrogenase (decarboxylating) activity	668	25.8823
An08g06520		Ortholog of A. nidulans FGSC A4 : AN0684, A. fumigatus Af293 : Afu1g13450, A. oryzae RIB40 : AO090012000535, Aspergillus wentii : Aspwe1_0171971 and Aspergillus sydowii : Aspsy1_0028405	1101	25.837
An02g02880		Ortholog(s) have GTP binding, GTPase activity	338	25.8163
An16g03820		Ortholog of A. nidulans FGSC A4 : AN4982, A. fumigatus Af293 : Afu3g10065, A. oryzae RIB40 : AO090003000540, Neosartorya fischeri NRRL 181 : NFIA_067230 and Aspergillus wentii : Aspwe1_0049188	536	25.7528
An02g11700		Ortholog(s) have copper ion transmembrane transporter activity and role in cellular copper ion homeostasis, copper ion import, protein maturation by copper ion transfer	373	25.7485
An11g06880		Ortholog of A. nidulans FGSC A4 : AN1764, A. fumigatus Af293 : Afu6g09130, Aspergillus wentii : Aspwe1_0176961, Aspergillus sydowii : Aspsy1_0053700 and Aspergillus terreus NIH2624 : ATET_06671	430	25.7088
An04g02020	cypB	ER peptidyl-prolyl cis-trans isomerase; cyclophilin; has a functional endoplasmic reticulum (ER) retention sequence	502	25.7052
An07g08810		G-protein coupled receptor; highly expressed in dormant conidia	394	25.6717
An07g09070		Ortholog(s) have structural constituent of ribosome activity and mitochondrial ribosome, mitochondrial small ribosomal subunit localization	312	25.64
An16g07795		Has domain(s) with predicted nucleic acid binding activity	843	25.6326
An08g00900		Protein of unknown function	156	25.607
An02g12330		Ortholog of A. nidulans FGSC A4 : AN2993, A. fumigatus Af293 : Afu3g08610, A. oryzae RIB40 : AO090005001411, Aspergillus wentii : Aspwe1_0550058 and Aspergillus sydowii : Aspsy1_0042547	526	25.5998
An04g01350		Ortholog(s) have SUMO conjugating enzyme activity, SUMO transferase activity and role in DNA repair, hyphal growth, mitotic spindle elongation, protein sumoylation, regulation of mitotic chromosome condensation	292	25.5764
An08g00320		Protein of unknown function	86	25.5414
An11g01480		Protein of unknown function	354	25.5414
An14g04040		Ortholog(s) have mitochondrion localization	1529	25.5047
An11g10600		Ortholog of Aspergillus wentii : Aspwe1_0029614, Aspergillus niger ATCC 1015 : 179677-mRNA, Aspergillus carbonarius ITEM 5010 : Acar5010_041490 and Aspergillus brasiliensis : Aspbr1_0025927	864	25.4471
An18g03000		Ortholog(s) have protein kinase activity and role in maturation of SSU-rRNA from tricistronic rRNA transcript (SSU-rRNA, 5.8S rRNA, LSU-rRNA), positive regulation of RNA import into nucleus	536	25.4464
An07g09740		Has domain(s) with predicted solute:proton antiporter activity, role in cation transport, transmembrane transport and integral component of membrane localization	777	25.4171
An08g06850		Has domain(s) with predicted zinc ion binding activity	864	25.4002
An02g11950		Ortholog(s) have role in positive regulation of cellular response to hypoxia, regulation of protein glycosylation, sterol regulatory element binding protein cleavage and Dsc E3 ubiquitin ligase complex localization	430	25.3996
An04g02090	pyc	Cytoplasmic pyruvate carboxylase	1447	25.3905
An18g05190		Ortholog(s) have histone methyltransferase activity (H4-R3 specific), histone-arginine N-methyltransferase activity and protein-arginine N-methyltransferase activity, more	555	25.3495
An04g05860		Ribose-phosphate pyrophosphokinase	467	25.3352
An11g00200		Putative beta-glucosidase precursor	1032	25.3157
An12g04030		Ortholog(s) have role in nuclear migration	753	25.2795
An07g06010		Ortholog(s) have mitochondrion localization	524	25.2522
An08g11790		Has domain(s) with predicted ATP binding, protein kinase activity and role in protein phosphorylation	277	25.2317
An01g07390		Ortholog(s) have NAD+ binding, NAD-dependent histone deacetylase activity, NAD-dependent histone deacetylase activity (H3-K9 specific) and NAD-dependent histone deacetylase activity (H4-K16 specific), more	728	25.1408
An16g08900		Protein of unknown function	350	25.1109
An01g03410		Has domain(s) with predicted iron ion binding, iron-sulfur cluster binding activity and role in iron-sulfur cluster assembly	449	25.1052
An11g02990		Protein with similarity to cytochrome P450; expression induced by tunicamycin and DTT	689	25.0827
An13g00140		Has domain(s) with predicted RNA binding, nucleic acid binding, nucleotide binding activity	818	25.0514
An09g06110		Putative ubiquitin conjugating enzyme; expression enhanced by maltose	242	25.0446
An10g00530		Putative inositol-1-phosphate synthase; induced by growth on starch and lactate; induced by fenpropimorph	646	25.0147
An18g03790		Ortholog(s) have role in G1/S transition of mitotic cell cycle, ascospore formation, cellular response to carbon dioxide, pseudohyphal growth and SCF ubiquitin ligase complex localization	742	24.9627
An11g06760		Ortholog(s) have mRNA binding activity, role in mRNA splice site selection and U1 snRNP, U2-type prespliceosome, cytosol, nucleus localization	383	24.9549
An02g04510		Ortholog(s) have protein kinase activator activity and role in cellular calcium ion homeostasis, cellular protein localization, conidium formation, positive regulation of septation initiation signaling, septin ring assembly	433	24.9535
An08g08600		Protein of unknown function; expression repressed by tunicamycin and DTT	563	24.8785
An09g03110	amyE	Putative alpha-amylase	837	24.8583
An08g00010	hemB	5-aminolevulinic acid dehydratase (porphobilinogen synthase)	457	24.856
An18g01010		Has domain(s) with predicted transmembrane transporter activity, role in transmembrane transport and integral component of membrane, plasma membrane localization	578	24.8534
An08g10710		Ortholog(s) have proteasome regulatory particle, lid subcomplex localization	495	24.8291
An08g01770		Ortholog(s) have protein kinase regulator activity, protein serine/threonine kinase activator activity and role in cellular response to drug, negative regulation of transcription by RNA polymerase II, protein phosphorylation	492	24.7955
An16g04460		Ortholog(s) have nucleus localization	990	24.7707
An15g06370		Ortholog(s) have chaperonin-containing T-complex localization	778	24.7277
An07g02370		Ortholog of Aspergillus brasiliensis : Aspbr1_0175385	1146	24.6883
An04g02590		Protein of unknown function	341	24.6871
An06g01440		Ortholog(s) have role in positive regulation of mitotic cell cycle and intracellular, nucleus localization	629	24.6555
An11g10380		Ortholog(s) have proteasome regulatory particle, lid subcomplex localization	800	24.6063
An01g12670		Protein of unknown function	163	24.6054
An14g06000		Ortholog(s) have ubiquitin binding activity, role in mitochondrial fission, mitochondrial genome maintenance, peroxisome fission and mitochondrial outer membrane localization	848	24.5234
An12g10730		Ortholog of A. oryzae RIB40 : AO090010000552, AO090020000166, Aspergillus wentii : Aspwe1_0041490, Aspwe1_0144002, Aspergillus versicolor : Aspve1_0054286 and Aspergillus niger ATCC 1015 : 195023-mRNA	431	24.4629
An04g01340		Putative asparagine synthase	871	24.4575
An08g10740		Putative ZmGnsN3 glucanase	357	24.4327
An13g01530		Ortholog of A. nidulans FGSC A4 : AN3616, A. fumigatus Af293 : Afu3g00350, Aspergillus wentii : Aspwe1_0143920, Aspergillus sydowii : Aspsy1_0040713 and Aspergillus terreus NIH2624 : ATET_02895	148	24.4194
An08g00330		Has domain(s) with predicted structural constituent of ribosome activity, role in translation and large ribosomal subunit localization	170	24.3934
An04g07270		Ortholog(s) have Prp19 complex, post-mRNA release spliceosomal complex, spliceosomal complex localization	395	24.3456
An16g02240		Predicted NMR-like protein; protein levels influenced by the presence of lactate	359	24.3348
An08g02240		Has domain(s) with predicted integral component of membrane localization	350	24.2921
An16g00850		Ortholog of A. nidulans FGSC A4 : AN5938, A. fumigatus Af293 : Afu5g01380, A. oryzae RIB40 : AO090701000476, Aspergillus wentii : Aspwe1_0588663 and Aspergillus sydowii : Aspsy1_0085137	309	24.269
An01g09660		Protein of unknown function	465	24.2185
An08g03460		Ortholog(s) have role in endonucleolytic cleavage in 5-ETS of tricistronic rRNA transcript (SSU-rRNA, 5.8S rRNA and LSU-rRNA), more	766	24.2137
An02g12940		Ortholog of A. oryzae RIB40 : AO090011000065, Aspergillus clavatus NRRL 1 : ACLA_006700, Aspergillus niger ATCC 1015 : 52445-mRNA and Aspergillus carbonarius ITEM 5010 : Acar5010_516919	354	24.2014
An03g02040		Has domain(s) with predicted role in lipid biosynthetic process	531	24.1669
An07g05930		Ortholog(s) have D-leucyl-tRNA(Leu) deacylase activity, D-tyrosyl-tRNA(Tyr) deacylase activity and role in D-leucine catabolic process, D-tyrosine catabolic process, tRNA metabolic process	328	24.1568
An09g06050		S-adenosylmethionine decarboxylase	588	24.1297
An01g12230		Ortholog(s) have histone-glutamine methyltransferase activity, mRNA binding, rRNA methyltransferase activity and role in box C/D snoRNA 3-end processing, histone glutamine methylation, rRNA methylation, rRNA processing, snoRNA processing	471	24.1178
An16g01570		Ortholog(s) have actin filament binding activity	373	24.1066
An07g00820		Ortholog(s) have intracellular localization	504	24.0884
An12g03390		Protein of unknown function	1036	24.0816
An12g01210		Ortholog(s) have dipeptide transmembrane transporter activity, peptide transmembrane transporter activity, tripeptide transmembrane transporter activity	740	24.0466
An03g05960		Has domain(s) with predicted catalytic activity	324	24.0285
An02g04555		Ortholog of A. nidulans FGSC A4 : AN6285, A. fumigatus Af293 : Afu2g12420, Aspergillus wentii : Aspwe1_0661381, Aspergillus sydowii : Aspsy1_0089680 and Aspergillus carbonarius ITEM 5010 : Acar5010_001248	231	24.023
An01g11080		Ortholog(s) have MAP kinase kinase activity, MAP-kinase scaffold activity, protein kinase activity	791	23.9943
An04g03870		Has domain(s) with predicted catalytic activity and membrane localization	378	23.9926
An01g04690		Ortholog(s) have adenine nucleotide transmembrane transporter activity and role in ATP transport, fatty acid beta-oxidation, fatty acid metabolic process, peroxisome organization	445	23.9787
An15g04660		Has domain(s) with predicted NAD binding, oxidoreductase activity, acting on the CH-OH group of donors, NAD or NADP as acceptor activity and role in oxidation-reduction process	464	23.9709
An05g01380		Has domain(s) with predicted oxidoreductase activity and role in metabolic process	358	23.9618
An14g04530		Ortholog of A. fumigatus Af293 : Afu5g10160, Afu6g11740, A. niger CBS 513.88 : An12g10580, An14g06920, A. oryzae RIB40 : AO090010000533 and Aspergillus wentii : Aspwe1_0151912	364	23.9368
An11g11210		Ortholog(s) have chromatin binding, mRNA binding activity	633	23.8743
An01g14080		Ortholog(s) have structural constituent of ribosome activity and cytosolic small ribosomal subunit localization	251	23.85
An08g10660		Protein of unknown function	652	23.7628
An01g10840		Ortholog(s) have S-adenosylmethionine-dependent methyltransferase activity, protein-lysine N-methyltransferase activity	453	23.7095
An01g06060		Rab GTPase	350	23.6745
An04g07200		Putative kynureninase	576	23.6677
An07g03130		Ortholog(s) have role in cellular iron ion homeostasis and mitochondrion localization	566	23.6525
An08g01840		Ortholog(s) have role in ascospore formation, asexual sporulation resulting in formation of a cellular spore and mitochondrion, nucleus localization	400	23.6494
An15g02190		Has domain(s) with predicted role in transmembrane transport and integral component of membrane localization	630	23.6355
An01g04090		Protein of unknown function	292	23.6314
An02g07720	gaaC	Putative 2-keto-3-deoxy-l-galactonate aldolase; predicted role in pectin degradation	357	23.598
An07g03740		Has domain(s) with predicted ER membrane protein complex localization	1102	23.5655
An06g00530		Ortholog of Aspergillus acidus : Aspfo1_0703635 and Aspergillus niger ATCC 1015 : 37764-mRNA	742	23.5483
An11g10470		Ortholog(s) have mitochondrion localization	564	23.4921
An08g03850		Ortholog(s) have role in quinate catabolic process	614	23.4205
An15g03910		Ortholog(s) have role in DNA repair, GPI anchor biosynthetic process, hyphal growth and endoplasmic reticulum localization	790	23.4188
An16g05980		Protein of unknown function	152	23.331
An14g02200		Ortholog of A. nidulans FGSC A4 : AN7183, A. fumigatus Af293 : Afu4g03170, A. oryzae RIB40 : AO090011000108, Aspergillus wentii : Aspwe1_0097292 and Aspergillus sydowii : Aspsy1_0157838	220	23.2964
An02g01750		Ortholog(s) have adenyl-nucleotide exchange factor activity, role in protein import into mitochondrial matrix, protein refolding and PAM complex, Tim23 associated import motor, mitochondrial matrix, mitochondrion localization	320	23.1405
An04g05550		Mucin-like protein	429	23.1165
An03g04910		Ortholog(s) have role in Golgi to vacuole transport, endosomal transport, vesicle-mediated transport and AP-1 adaptor complex, Golgi apparatus, endosome localization	456	23.1088
An07g04880		Has domain(s) with predicted ATP binding, protein kinase activity, transferase activity, transferring phosphorus-containing groups activity and role in protein phosphorylation	708	23.089
An05g02070		Putative alcohol dehydrogenase (catalyzed by glycerol dehydrogenase II (NADP+)	408	23.0143
An04g04680		Has domain(s) with predicted FAD binding, oxidoreductase activity and role in metabolic process	630	23.0135
An14g04880		Ortholog(s) have role in ATP export, asexual sporulation resulting in formation of a cellular spore, intralumenal vesicle formation, late endosome to vacuole transport and protein retention in Golgi apparatus, more	355	23.0132
An16g08070		Ortholog of A. nidulans FGSC A4 : AN10908, A. niger CBS 513.88 : An06g00460, An07g04470 and A. oryzae RIB40 : AO090038000122	633	23.0047
An04g03360	prx1	Putative mitochondrial peroxiredoxin; induced by growth on starch and lactate	303	22.9509
An17g00820		Carbamoyl-phosphate synthetase, aspartate transcarbamylase, and glutamine amidotransferase	489	22.9253
An06g00310		Ortholog(s) have extracellular region localization	723	22.9225
An08g10050		Ortholog(s) have role in proteasome regulatory particle assembly and cytoplasm, cytosol, nucleus localization	327	22.9199
An02g14900	atg7	Ubiquitine activating enzyme; predicted role in autophagy	338	22.9113
An04g05000		Has domain(s) with predicted oxidoreductase activity and role in metabolic process	508	22.8917
An16g00350		Ortholog of A. oryzae RIB40 : AO090138000093, Aspergillus wentii : Aspwe1_0115016, Aspergillus niger ATCC 1015 : 184233-mRNA and Aspergillus zonatus : Aspzo1_0167157	642	22.8505
An16g04820		Ortholog(s) have intracellular localization	378	22.835
An14g02080		Putative prolidase	516	22.8332
An14g01960		Ortholog of A. nidulans FGSC A4 : AN7165, A. fumigatus Af293 : Afu4g03330, A. oryzae RIB40 : AO090011000165, Aspergillus wentii : Aspwe1_0053298 and Aspergillus sydowii : Aspsy1_0060563	854	22.8258
An07g10370		Has domain(s) with predicted transmembrane transporter activity, role in transmembrane transport and integral component of membrane, membrane localization	719	22.8071
An08g07460	trp2	Ca2+-permeable channel	1231	22.7968
An06g01910		Has domain(s) with predicted role in attachment of spindle microtubules to kinetochore and DASH complex, mitotic spindle localization	374	22.7657
An03g04790		Ortholog(s) have preprotein binding activity and role in conidium formation, hyphal growth, mitochondrion organization, protein targeting to mitochondrion	764	22.7431
An02g08050		Phosphatidyl synthase	501	22.7367
An18g06850		Ortholog(s) have protein methyltransferase activity, rRNA (guanine) methyltransferase activity, tRNA (guanine-N2-)-methyltransferase activity	167	22.6883
An01g01080		Has domain(s) with predicted oxidoreductase activity and role in metabolic process	350	22.666
An08g02625		Protein of unknown function	66	22.6577
An18g04010		Has domain(s) with predicted DNA binding, zinc ion binding activity	484	22.6079
An15g04490		Ortholog(s) have Arp2/3 complex binding, actin filament binding, actin-dependent ATPase activity, microfilament motor activity	1524	22.5993
An01g03780		Protein of unknown function	420	22.5554
An02g06560		Ortholog(s) have glutathione peroxidase activity, glutathione transferase activity	306	22.5105
An15g06020		Ortholog(s) have ATP binding, magnesium ion binding, ubiquitin activating enzyme activity, role in protein ubiquitination and cytoplasm, nucleus localization	1177	22.5084
An16g06890		Ortholog of A. nidulans FGSC A4 : AN6104, A. fumigatus Af293 : Afu2g09510, A. oryzae RIB40 : AO090011000722, Aspergillus wentii : Aspwe1_0045050 and Aspergillus sydowii : Aspsy1_0151936	298	22.4921
An16g05370		Ortholog(s) have GTPase activator activity and role in COPI coating of Golgi vesicle, endoplasmic reticulum to Golgi vesicle-mediated transport, retrograde vesicle-mediated transport, Golgi to endoplasmic reticulum	613	22.4439
An09g04600		Ortholog(s) have role in filamentous growth of a population of unicellular organisms and growth of unicellular organism as a thread of attached cells, more	160	22.4047
An02g07340		Has domain(s) with predicted ADP binding activity	1249	22.3899
An02g10390		Has domain(s) with predicted ATP binding, helicase activity, nucleic acid binding activity	557	22.3547
An12g09340	ohbA2	Has domain(s) with predicted FMN binding, carboxy-lyase activity, oxidoreductase activity, role in oxidation-reduction process, ubiquinone biosynthetic process and plasma membrane localization	561	22.3189
An07g06230		Ortholog of A. fumigatus Af293 : Afu8g02490, Aspergillus brasiliensis : Aspbr1_0054487, Neosartorya fischeri NRRL 181 : NFIA_096210 and Aspergillus fumigatus A1163 : AFUB_084100	330	22.298
An16g07210		Ortholog(s) have role in cellular response to DNA damage stimulus, cleistothecium development, conidiophore development, conidium formation, entrainment of circadian clock by photoperiod and hyphal growth, more	441	22.2956
An12g00800		Ortholog(s) have plasma membrane localization	1725	22.2925
An04g03880		Ortholog of A. nidulans FGSC A4 : AN1633, A. fumigatus Af293 : Afu4g08980, A. oryzae RIB40 : AO090023000634, Aspergillus wentii : Aspwe1_0166944 and Aspergillus sydowii : Aspsy1_0144993	135	22.2744
An18g04365	NA	NA	243	22.2617
An04g00270		Ortholog of A. nidulans FGSC A4 : AN4312, A. fumigatus Af293 : Afu4g06040, A. oryzae RIB40 : AO090023000991, Aspergillus wentii : Aspwe1_0101375 and Aspergillus sydowii : Aspsy1_0036593	785	22.258
An16g04220		Ortholog of A. nidulans FGSC A4 : AN7918, A. fumigatus Af293 : Afu8g05870, A. niger CBS 513.88 : An15g04360, An09g00420 and A. oryzae RIB40 : AO090003001435	276	22.2519
An18g06430		Ortholog of A. nidulans FGSC A4 : AN10705, A. fumigatus Af293 : Afu6g06630, A. oryzae RIB40 : AO090003000039, Neosartorya fischeri NRRL 181 : NFIA_052280 and Aspergillus wentii : Aspwe1_0170257	326	22.2395
An02g10100		Ortholog of A. nidulans FGSC A4 : AN8003, A. fumigatus Af293 : Afu5g02600, Aspergillus wentii : Aspwe1_0174280, Aspergillus sydowii : Aspsy1_0033725 and Aspergillus terreus NIH2624 : ATET_09228	509	22.1852
An11g09110		Has domain(s) with predicted 2-oxoglutarate-dependent dioxygenase activity, L-ascorbic acid binding, iron ion binding, oxidoreductase activity, acting on paired donors, with incorporation or reduction of molecular oxygen activity	523	22.1308
An01g14110		Phosphatidylserine decarboxylase	568	22.1016
An02g01390	atg20	Sorting nexin family member; predicted role in autophagy	733	22.0985
An18g05690		Has domain(s) with predicted phosphatidylinositol-4-phosphate binding activity	450	22.0861
An09g06570		Protein of unknown function	469	22.085
An01g09490		Ortholog(s) have nucleolus localization	311	22.0649
An02g04530		Has domain(s) with predicted role in lipid biosynthetic process	602	22.0285
An08g01370		Ortholog(s) have dicarboxylic acid transmembrane transporter activity, role in mitochondrial transport and mitochondrial inner membrane localization	409	22.0203
An15g00730		Has domain(s) with predicted role in cleavage involved in rRNA processing	411	22.0166
An11g01560		Protein of unknown function	247	21.9969
An13g01910		Ortholog of Aspergillus tubingensis : Asptu1_0356856, Aspergillus brasiliensis : Aspbr1_0133839, Aspergillus kawachii : Aspka1_0182154 and Aspergillus acidus : Aspfo1_0063873	605	21.9871
An16g04730		Ortholog of A. nidulans FGSC A4 : AN5983, A. fumigatus Af293 : Afu2g10260, A. oryzae RIB40 : AO090011000610, Aspergillus wentii : Aspwe1_0053775 and Aspergillus sydowii : Aspsy1_0152032	622	21.9309
An08g00840		Has domain(s) with predicted catalytic activity and role in biosynthetic process	493	21.8913
An11g04720		Has domain(s) with predicted carboxy-lyase activity, catalytic activity, pyridoxal phosphate binding activity and role in carboxylic acid metabolic process	519	21.8745
An05g02200		Has domain(s) with predicted ATP binding, microtubule binding, microtubule motor activity, role in microtubule-based movement and microtubule associated complex localization	460	21.8546
An04g07280		Ortholog of A. nidulans FGSC A4 : AN1862, A. fumigatus Af293 : Afu4g09790, Aspergillus wentii : Aspwe1_0166824, Aspergillus sydowii : Aspsy1_0138374 and Aspergillus terreus NIH2624 : ATET_00762	657	21.8157
An01g11990		Ortholog of A. nidulans FGSC A4 : AN0754, A. fumigatus Af293 : Afu1g14150, A. oryzae RIB40 : AO090012000447, Neosartorya fischeri NRRL 181 : NFIA_011270 and Aspergillus wentii : Aspwe1_0040208	138	21.8113
An09g02943		Ortholog of Aspergillus tubingensis : Asptu1_0136466 and Aspergillus acidus : Aspfo1_0092981	87	21.7853
An18g05200		Protein of unknown function	222	21.7749
An12g02070		Has domain(s) with predicted RNA binding, endoribonuclease activity, ribonuclease activity	228	21.7292
An11g06200		Putative NADH ubiquinone reductase, 31 kD subunit; protein levels influenced by the presence of lactate	329	21.7022
An15g00540		Ortholog(s) have role in late endosome to vacuole transport via multivesicular body sorting pathway and Vps55/Vps68 complex, fungal-type vacuole membrane localization	256	21.651
An16g03120		Has domain(s) with predicted nucleic acid binding, nucleotide binding activity	704	21.6223
An12g08690		Ortholog(s) have plasma membrane localization	623	21.573
An16g09010	protH	Putative protease	739	21.5666
An07g09940		Ortholog of Aspergillus tubingensis : Asptu1_0058100 and Aspergillus acidus : Aspfo1_0083931	814	21.5313
An13g00370		Ortholog(s) have role in conidium formation, negative regulation of conidium formation and positive regulation of developmental process, more	644	21.3841
An13g01150		Has domain(s) with predicted intracellular localization	784	21.3662
An08g06330		COPI complex, epsilon subunit; expression enhanced by maltose	407	21.3194
An05g01270		Has domain(s) with predicted nucleic acid binding activity	420	21.3014
An08g00210		Glycerol 3-phosphate dehydrogenase (FAD-dependent sn-glycerol-3-phosphate dehydrogenase)	771	21.202
An14g05150		Ortholog(s) have thiol-dependent ubiquitin-specific protease activity, role in protein deubiquitination and cytoplasm, endoplasmic reticulum localization	660	21.1562
An02g14560	ostA	Oligosaccharyltransferase complex alpha subunit; expression enhanced by maltose; expression induced by tunicamycin and DTT	562	21.1465
An15g07140		Ortholog of A. fumigatus Af293 : Afu5g00590, A. niger CBS 513.88 : An13g01800 and Aspergillus wentii : Aspwe1_0039567, Aspwe1_0040764, Aspwe1_0044902	341	21.0377
An02g01970		Ortholog(s) have role in exonucleolytic trimming to generate mature 3-end of 5.8S rRNA from tricistronic rRNA transcript (SSU-rRNA, 5.8S rRNA, LSU-rRNA), nuclear polyadenylation-dependent tRNA catabolic process, rRNA catabolic process	403	21.0236
An11g09610		Ortholog(s) have NEDD8-specific protease activity	520	20.9752
An04g00120		Ortholog(s) have thioredoxin peroxidase activity, role in cell redox homeostasis, cellular response to oxidative stress and nucleus localization	267	20.9703
An16g01630		Has domain(s) with predicted oxidoreductase activity, transferase activity, transferring acyl groups other than amino-acyl groups, zinc ion binding activity and role in oxidation-reduction process	422	20.9698
An04g02190		Mevalonate kinase	442	20.9526
An06g01130		Ortholog(s) have ATP-dependent microtubule motor activity, plus-end-directed, ATPase activity, motor activity, protein dimerization activity, tubulin binding activity	1007	20.9379
An08g03600		Ortholog(s) have extracellular region localization	310	20.9245
An12g07270		Ortholog of Aspergillus tubingensis : Asptu1_0047450, Aspergillus brasiliensis : Aspbr1_0045398, Aspergillus kawachii : Aspka1_0177839 and Aspergillus acidus : Aspfo1_0047769	343	20.9185
An15g07500	rbkA	Putative ribokinase	336	20.9111
An15g01680		Ortholog(s) have role in establishment or maintenance of cell polarity	385	20.8866
An04g01580		Ortholog(s) have sterol binding activity	259	20.8814
An01g00280		Has domain(s) with predicted phosphatase activity and role in metabolic process	377	20.8783
An01g09120		Ortholog of A. nidulans FGSC A4 : AN1954, A. fumigatus Af293 : Afu4g13410, Aspergillus wentii : Aspwe1_0033776, Aspergillus sydowii : Aspsy1_0053894 and Aspergillus terreus NIH2624 : ATET_03223	579	20.8758
An02g13360		Ortholog(s) have copper ion binding activity, role in cell redox homeostasis, cellular response to oxidative stress, mitochondrial respiratory chain complex IV assembly and mitochondrial inner membrane, plasma membrane localization	343	20.8191
An11g02860		Lactoylglutathione lyase (glyoxylase I)	384	20.8147
An08g00070		Ortholog(s) have nuclear export signal receptor activity, role in protein export from nucleus and nuclear periphery, nucleus localization	1269	20.8143
An05g02330		Ortholog of Aspergillus tubingensis : Asptu1_0050289, Aspergillus brasiliensis : Aspbr1_0138315, Aspergillus acidus : Aspfo1_0147647 and Aspergillus niger ATCC 1015 : 203423-mRNA	496	20.7002
An11g10320	slaB	Predicted actin-binding protein involved in endocytosis	1239	20.6673
An08g02830		Ortholog(s) have tubulin binding activity, role in positive regulation of transcription elongation from RNA polymerase II promoter, tubulin complex assembly and cell division site, cell tip, cytoplasm, prefoldin complex localization	244	20.6361
An12g01850		Beta-mannosidase	888	20.6188
An04g07250		Ortholog(s) have role in DNA repair, chromatin remodeling, chromatin silencing at telomere, histone exchange and NuA4 histone acetyltransferase complex, Swr1 complex localization	287	20.5909
An01g03140		Protein of unknown function	816	20.5621
An03g05360		Ortholog of A. nidulans FGSC A4 : AN2821, A. fumigatus Af293 : Afu2g00180, Afu2g17480, A. niger CBS 513.88 : An04g09420 and A. oryzae RIB40 : AO090102000063, AO090009000716	557	20.5467
An08g08980		Ortholog(s) have role in cellular response to drug	733	20.5463
An11g10260		Ortholog(s) have acetylglucosaminyltransferase activity, role in protein N-linked glycosylation and Golgi medial cisterna localization	404	20.5388
An02g01240		Has domain(s) with predicted protein heterodimerization activity, sequence-specific DNA binding activity and intracellular localization	309	20.4675
An15g05910		Ortholog of A. nidulans FGSC A4 : AN2182, A. fumigatus Af293 : Afu2g15670, Aspergillus wentii : Aspwe1_0039157, Aspergillus sydowii : Aspsy1_0139789 and Aspergillus terreus NIH2624 : ATET_02443	418	20.4527
An02g01010		Protein of unknown function	373	20.444
An16g02970		Glycine hydroxymethyltransferase/serine hydroxymethyltransferase	524	20.4268
An01g05120		Protein of unknown function	396	20.4083
An03g01050		Endo-beta-1,4-glucanase	520	20.408
An02g01530		Ortholog of A. nidulans FGSC A4 : AN6271, A. fumigatus Af293 : Afu2g12600, A. oryzae RIB40 : AO090026000355, Aspergillus wentii : Aspwe1_0175672 and Aspergillus sydowii : Aspsy1_0152443	718	20.3945
An08g10350		Ortholog(s) have transcription factor TFIIE complex localization	280	20.3401
An08g11210		Protein of unknown function	194	20.3075
An02g14260		Protein of unknown function	292	20.2886
An02g07070		Putative Atf1-like transcription factor; ortholog(s) have role in cellular response to heat, cellular response to oxidative stress; expressed in germinating conidia	648	20.2828
An09g05490		p24 family protein; expression enhanced by maltose	293	20.226
An18g06600		Has domain(s) with predicted nucleic acid binding, nucleotide binding activity	187	20.204
An03g02920		Has domain(s) with predicted 4 iron, 4 sulfur cluster binding, catalytic activity, iron-sulfur cluster binding, metal ion binding activity and role in Mo-molybdopterin cofactor biosynthetic process	407	20.193
An02g03350		Ortholog(s) have role in endonucleolytic cleavage in ITS1 to separate SSU-rRNA from 5.8S rRNA and LSU-rRNA from tricistronic rRNA transcript (SSU-rRNA, 5.8S rRNA, LSU-rRNA), rRNA processing, ribosomal small subunit biogenesis	395	20.1777
An04g09630		Ortholog of A. nidulans FGSC A4 : AN10915, A. niger CBS 513.88 : An03g01920, Aspergillus wentii : Aspwe1_0160312, Aspwe1_0167997 and Aspergillus versicolor : Aspve1_0513563	408	20.1486
An09g02120		Has domain(s) with predicted 2-oxoglutarate-dependent dioxygenase activity, catalytic activity and role in metabolic process, oxidation-reduction process	791	20.1388
An02g04050		Has domain(s) with predicted protein tyrosine phosphatase activity, protein tyrosine/serine/threonine phosphatase activity and role in dephosphorylation, protein dephosphorylation	585	20.1262
An08g03950		Ortholog of A. nidulans FGSC A4 : AN1118, A. fumigatus Af293 : Afu1g11760, A. oryzae RIB40 : AO090038000245, Aspergillus wentii : Aspwe1_0172137 and Aspergillus sydowii : Aspsy1_0083626	381	20.1225
An01g09520		Ortholog(s) have MAP kinase activity, protein kinase activity, protein serine/threonine kinase activity	483	20.1182
An08g00690		Ortholog(s) have kinase binding activity, role in asexual sporulation, conidiophore development, establishment or maintenance of cell polarity, hyphal growth, regulation of kinase activity and cytoplasm, hyphal tip localization	426	20.0898
An04g04730		Ortholog of A. nidulans FGSC A4 : AN5573, A. fumigatus Af293 : Afu4g11630, A. oryzae RIB40 : AO090003001056, Aspergillus wentii : Aspwe1_0166629 and Aspergillus sydowii : Aspsy1_0088453	847	20.0757
An16g05530		Protein of unknown function	320	20.0324
An02g03440		Ortholog of Aspergillus acidus : Aspfo1_0122417	212	20.025
An06g01390		NADH-ubiquinone oxidoreductase; respiratory-chain NADH dehydrogenase	248	19.9441
An16g02690		Protein of unknown function	316	19.8991
An18g03740	mkkA	MAP kinase kinase (MAPKK) with a predicted role in the cell wall integrity pathway; induced by caspofungin	568	19.8842
An07g04010		Ortholog of A. nidulans FGSC A4 : AN4671, A. fumigatus Af293 : Afu5g09070, Aspergillus wentii : Aspwe1_0281750, Aspergillus sydowii : Aspsy1_0059434 and Aspergillus terreus NIH2624 : ATET_06560	330	19.8415
An16g07630		Ortholog of A. nidulans FGSC A4 : AN1509, A. fumigatus Af293 : Afu8g05120, A. oryzae RIB40 : AO090005000631, Aspergillus wentii : Aspwe1_0044080 and Aspergillus sydowii : Aspsy1_0028718	256	19.8139
An02g13770		Ortholog of A. nidulans FGSC A4 : AN4257, A. fumigatus Af293 : Afu6g12230, Afu7g04010, A. niger CBS 513.88 : An13g00460 and A. oryzae RIB40 : AO090026000813, AO090120000195	625	19.8056
An01g03370		Has domain(s) with predicted GTP binding, guanyl-nucleotide exchange factor activity, role in regulation of small GTPase mediated signal transduction, small GTPase mediated signal transduction and intracellular localization	1255	19.7574
An03g01910		Acetylglutamate kinase	464	19.6733
An04g02440		Ortholog of Aspergillus tubingensis : Asptu1_0046747, Aspergillus brasiliensis : Aspbr1_0044185, Aspergillus kawachii : Aspka1_0172943 and Aspergillus acidus : Aspfo1_0044902	266	19.6586
An01g01720		Ortholog(s) have RNA polymerase II proximal promoter sequence-specific DNA binding, cysteine-type peptidase activity, double-stranded DNA binding, mRNA binding, single-stranded DNA binding activity	519	19.6443
An02g03320		3-ketoacyl-CoA thiolase	478	19.6409
An03g01090	hocA	Putative alpha-1,6-Mannosyltransferase; induced by caspofungin	435	19.616
An18g03390		Protein of unknown function	195	19.5777
An07g01750		Ortholog of A. nidulans FGSC A4 : AN3529, AN4144, AN8311, AN9211, AN4846 and A. fumigatus Af293 : Afu1g17260, Afu4g07950, Afu4g09380, Afu6g00560, Afu6g12140, Afu8g01900	309	19.5741
An03g06820		Ortholog of A. fumigatus Af293 : Afu8g02720, A. oryzae RIB40 : AO090010000763, Aspergillus wentii : Aspwe1_0177783, Aspergillus sydowii : Aspsy1_0050811 and Aspergillus terreus NIH2624 : ATET_10385	541	19.5721
An02g13670		Ortholog(s) have calcium ion transmembrane transporter activity, manganese ion transmembrane transporter activity	506	19.5344
An18g02200		Has domain(s) with predicted integral component of membrane localization	513	19.533
An18g04000		Has domain(s) with predicted membrane localization	119	19.4835
An10g00680		Has domain(s) with predicted proton transmembrane transporter activity and role in proton transmembrane transport	299	19.4818
An02g02460		Ortholog of A. oryzae RIB40 : AO090011000129, Neosartorya fischeri NRRL 181 : NFIA_057670, Aspergillus wentii : Aspwe1_0041102, Aspwe1_0179879 and Aspergillus versicolor : Aspve1_0047487	287	19.4543
An09g04540		Protein of unknown function	278	19.4428
An03g04410		Putative dolichyl-phosphate glucosyltransferase; expression enhanced by maltose; expression induced by tunicamycin and DTT	444	19.4051
An12g02890		Branched chain amino acid aminotransferase	439	19.3991
An14g02250		Lactic acid dehydrogenase	489	19.3699
An02g09930		Cytochrome c oxidase subunit	270	19.3495
An08g03500		Protein of unknown function	113	19.3443
An16g09260	ssb2	DnaK-type molecular chaperone	661	19.3256
An07g04190		Oligosaccharyltransferase complex beta subunit; expression enhanced by maltose; expression induced by tunicamycin and DTT	475	19.3187
An18g01090		Has domain(s) with predicted phospholipase activity and role in metabolic process, phospholipid catabolic process	594	19.3121
An16g09200		Ortholog(s) have role in regulation of heterochromatin domain assembly and Prp19 complex, U5 snRNP, post-mRNA release spliceosomal complex, spliceosomal complex localization	976	19.3004
An17g01925		Ortholog(s) have role in cellular calcium ion homeostasis, cellular potassium ion homeostasis, response to salt stress	492	19.2972
An13g00090		Ortholog(s) have drug binding, sterol 14-demethylase activity and role in cell growth mode switching, budding to filamentous, cellular response to drug, ergosterol biosynthetic process, membrane raft polarization	539	19.292
An15g06860		Ortholog of A. nidulans FGSC A4 : AN7341, A. oryzae RIB40 : AO090102000219, Neosartorya fischeri NRRL 181 : NFIA_091700, Aspergillus wentii : Aspwe1_0107255 and Aspergillus versicolor : Aspve1_0125535	380	19.2727
An08g06450		Has domain(s) with predicted racemase activity, acting on amino acids and derivatives activity and role in nitrogen compound metabolic process	267	19.2642
An02g02610		Protein of unknown function	482	19.2599
An01g08810		Protein of unknown function	148	19.2471
An04g05430		Ortholog of A. nidulans FGSC A4 : AN5612, A. fumigatus Af293 : Afu4g11230, A. oryzae RIB40 : AO090003001098, Aspergillus wentii : Aspwe1_0022777 and Aspergillus sydowii : Aspsy1_0148394	544	19.2445
An02g14910		Protein of unknown function	274	19.2262
An08g10340		Has domain(s) with predicted 3,4-dihydroxy-2-butanone-4-phosphate synthase activity and role in riboflavin biosynthetic process	363	19.2196
An03g04530		Beta-phosphoglucomutase beta-PGM	241	19.2118
An02g04080		Has domain(s) with predicted role in RNA processing	153	19.1937
An05g02490		Has domain(s) with predicted DNA binding, DNA-binding transcription factor activity, RNA polymerase II-specific, zinc ion binding activity and role in regulation of transcription, DNA-templated, transcription, DNA-templated	657	19.1648
An11g06140		1-pyrroline-5-carboxylate dehydrogenase	569	19.1325
An16g06770		Ortholog(s) have role in cellular response to drug, secondary metabolite biosynthetic process	474	19.1318
An04g07550		Protein of unknown function	313	19.1255
An02g00120		Protein of unknown function; expression regulated by tunicamycin and DTT	242	19.1008
An08g05580		Putative isocitrate dehydrogenase (NAD+)	623	19.0978
An01g02300		Ortholog(s) have Arp2/3 complex binding activity, role in actin cortical patch assembly, actin filament debranching, negative regulation of Arp2/3 complex-mediated actin nucleation and actin cortical patch, cytoplasm localization	215	19.0939
An04g02300		Enoyl-ACP reductase	311	19.0763
An05g00090		Ortholog(s) have role in TOR signaling, positive regulation of phosphoprotein phosphatase activity, regulation of filamentous growth of a population of unicellular organisms in response to chemical stimulus, signal transduction	279	19.074
An02g11330		Ortholog of A. nidulans FGSC A4 : AN8368, AN2952, A. fumigatus Af293 : Afu3g07900, Afu4g14080, Afu8g00900, A. niger CBS 513.88 : An03g05560 and A. oryzae RIB40 : AO090120000471	417	19.0192
An03g04920		Ortholog(s) have role in negative regulation of transcription by RNA polymerase III	317	19.0061
An16g00910		Has domain(s) with predicted FMN binding, catalytic activity, oxidoreductase activity and role in oxidation-reduction process	396	18.9834
An14g01460		Glutamate-ammonia ligase	468	18.9375
An11g01300		Ortholog(s) have unfolded protein binding activity, role in ribosome biogenesis and nucleolus localization	489	18.9238
An12g01190	ssoA	Predicted plasma membrane t-SNARE involved in vesicular transport	359	18.9137
An02g04000		Ortholog(s) have role in cellular response to drug	456	18.9072
An18g06710		Ortholog(s) have unfolded protein binding activity	269	18.8753
An15g06240		Has domain(s) with predicted oxidoreductase activity and role in metabolic process	327	18.8618
An16g07620		Putative thiol oxidase; expression enhanced by maltose; expression induced by tunicamycin and DTT	572	18.7978
An08g02300		Protein of unknown function	246	18.7669
An08g06130	fadA	Heterotrimeric G-protein alpha-subunit; expressed in germinating conidia	368	18.7534
An01g06170		Ortholog of A. nidulans FGSC A4 : AN0356, A. fumigatus Af293 : Afu1g02080, A. oryzae RIB40 : AO090005000887, Aspergillus wentii : Aspwe1_0098094 and Aspergillus sydowii : Aspsy1_0085975	353	18.7367
An12g09350		Ortholog of A. nidulans FGSC A4 : AN2370, AN10160, AN0323, A. fumigatus Af293 : Afu1g02440, Afu4g02760, A. niger CBS 513.88 : An01g05750, An13g03290 and A. oryzae RIB40 : AO090020000719, AO090005000852	360	18.7345
An14g00130		Ortholog(s) have MAP kinase tyrosine phosphatase activity, protein tyrosine phosphatase activity	657	18.7201
An01g00150		Ortholog(s) have snoRNA binding activity	468	18.7005
An04g01330		Has domain(s) with predicted aminopeptidase activity, metalloexopeptidase activity and role in cellular process, proteolysis	507	18.6807
An14g01040		Has domain(s) with predicted translation initiation factor activity, translation initiation factor binding activity, role in translational initiation and eukaryotic translation initiation factor 3 complex localization	243	18.6719
An07g04147		Protein of unknown function	346	18.6127
An01g04250		Uroporphyrinogen III decarboxylase (Uro D, uroporphyrinogen decarboxylase); expression repressed by tunicamycin and DTT	377	18.6033
An04g06210		Homocitrate synthase	477	18.5947
An07g01340		Ortholog of A. fumigatus Af293 : Afu5g00650, Neosartorya fischeri NRRL 181 : NFIA_112140, Aspergillus wentii : Aspwe1_0156031, Aspwe1_0176825 and Aspergillus versicolor : Aspve1_0039791	303	18.5856
An03g06270		Putative isoamyl alcohol oxidase	510	18.5769
An12g08930		Has domain(s) with predicted catalytic activity	432	18.5755
An17g01740		Ortholog(s) have SUMO activating enzyme activity, role in mitotic chromosome condensation, protein sumoylation, regulation of mitotic chromosome condensation and SUMO activating enzyme complex, cytosol, nucleus localization	392	18.4727
An16g07390		Putative signal peptidase complex subunit; expression enhanced by maltose	236	18.4448
An01g06960		Ortholog(s) have role in hyperosmotic response, response to antibiotic, response to osmotic stress, response to salt stress and intracellular localization	316	18.4271
An07g10320		Ortholog(s) have role in macroautophagy and Golgi apparatus, phagophore assembly site localization	752	18.4258
An02g03000		Ortholog(s) have ubiquitin-protein transferase activator activity	209	18.4074
An18g01200		Has domain(s) with predicted electron transfer activity, heme binding, iron ion binding, oxidoreductase activity, acting on paired donors, with incorporation or reduction of molecular oxygen activity and role in oxidation-reduction process	596	18.3848
An14g00090		Has domain(s) with predicted 5-amino-6-(5-phosphoribosylamino)uracil reductase activity and role in oxidation-reduction process, riboflavin biosynthetic process	563	18.3791
An02g14850		Ortholog of A. fumigatus Af293 : Afu2g06205, A. oryzae RIB40 : AO090001000738, Aspergillus wentii : Aspwe1_0028348, Aspergillus clavatus NRRL 1 : ACLA_068110 and Aspergillus niger ATCC 1015 : 175113-mRNA	201	18.3613
An01g09260		Ortholog(s) have 4-hydroxybenzaldehyde dehydrogenase activity, carboxylate reductase activity	511	18.3104
An17g02210		Ortholog(s) have translation release factor activity, translation release factor activity, codon specific activity	498	18.2543
An16g09050		Ortholog(s) have choline:oxygen 1-oxidoreductase activity, role in choline catabolic process and intracellular localization	495	18.2491
An18g03220		Ortholog(s) have double-stranded DNA 5-3 exodeoxyribonuclease activity, single-stranded DNA endodeoxyribonuclease activity, tRNA (m5U54) methyltransferase activity and role in tRNA modification	457	18.2154
An04g05780		Ortholog of Aspergillus tubingensis : Asptu1_0058417	671	18.2089
An18g03250		Ortholog(s) have role in ascospore formation, conidiophore development, conidium formation, hyphal growth, sporocarp development involved in sexual reproduction	606	18.2009
An03g06960	abpA	Predicted actin-binding protein involved in endocytosis	735	18.1978
An05g00400		Ortholog of A. nidulans FGSC A4 : AN5834, AN4190, A. fumigatus Af293 : Afu1g05790, Afu2g07800, A. niger CBS 513.88 : An18g03730 and A. oryzae RIB40 : AO090011000916, AO090009000346	169	18.167
An12g07460		Protein of unknown function	281	18.1607
An11g01790		Has domain(s) with predicted GTP binding activity, role in small GTPase mediated signal transduction and intracellular localization	270	18.1478
An04g00260		Protein of unknown function	242	18.1368
An15g00080		Ortholog of A. nidulans FGSC A4 : AN6500, A. fumigatus Af293 : Afu6g05200, A. oryzae RIB40 : AO090701000014, Aspergillus wentii : Aspwe1_0104135 and Aspergillus sydowii : Aspsy1_0037102	222	18.0579
An16g05420	pgi1	Putative glucose-6-phosphate isomerase; expression induced by growth on xylose	486	18.0528
An16g00250		Ortholog of A. nidulans FGSC A4 : AN6809, A. fumigatus Af293 : Afu5g00680, A. oryzae RIB40 : AO090010000081, Neosartorya fischeri NRRL 181 : NFIA_041480 and Aspergillus wentii : Aspwe1_0041410	346	18.0353
An12g04050		Has domain(s) with predicted catalytic activity and role in metabolic process	456	18.018
An08g00310		Ortholog(s) have phosphatidylinositol-4-phosphate binding activity	381	17.9543
An09g00220		Has domain(s) with predicted O-methyltransferase activity, methyltransferase activity	460	17.9429
An15g03080		Has domain(s) with predicted acid-amino acid ligase activity	517	17.9219
An16g09030		Protein of unknown function	607	17.8613
An16g06800	eglB	Putative endoglucanase	495	17.8472
An18g05940	galA	Endogalactanase	314	17.838
An18g06670		Has domain(s) with predicted catalytic activity and role in metabolic process	278	17.8225
An01g09650		Has domain(s) with predicted metal ion binding activity	300	17.803
An13g00210		Ortholog(s) have phospholipid binding activity and cytosol, plasma membrane localization	1041	17.7921
An02g04860		Ortholog(s) have plasma membrane localization	309	17.7754
An14g03700		Ortholog of A. nidulans FGSC A4 : AN0227, A. fumigatus Af293 : Afu3g12020, Afu5g10910, Afu4g06275, A. niger CBS 513.88 : An04g00590, An02g07840 and A. oryzae RIB40 : AO090010000440, AO090023000963	435	17.7371
An01g07680		Protein of unknown function	882	17.7326
An11g04180	bipA	DnaK-type molecular chaperone; ER chaperone; unfolded protein response (UPR) target gene; expression enhanced by maltose, by heat shock, DTT and by tunicamycin treatment	608	17.7273
An06g00590		Ortholog of Aspergillus brasiliensis : Aspbr1_0040727, Aspergillus kawachii : Aspka1_0178283, Aspergillus wentii : Aspwe1_0099088 and Aspergillus versicolor : Aspve1_0086573	146	17.7236
An07g03440		Has domain(s) with predicted catalytic activity and role in metabolic process	515	17.7179
An07g08610		Ortholog of Aspergillus tubingensis : Asptu1_0057990, Aspergillus brasiliensis : Aspbr1_0054670 and Aspergillus acidus : Aspfo1_0063553	365	17.6967
An02g13420		Has domain(s) with predicted role in cell division, centromere complex assembly, chromosome segregation and kinetochore, nucleus localization	316	17.6842
An15g01780		2-methylcitrate hydrolyase/2-methylcitrate dehydratase	471	17.6704
An07g00130		Has domain(s) with predicted N-acetyltransferase activity	170	17.6505
An07g10040	hemF	Coproporphyrinogen III oxidase (coproporphyrinogenase)	382	17.6498
An16g08350		Protein of unknown function	140	17.5974
An04g06750		Ortholog of A. niger CBS 513.88 : An18g00370, Aspergillus niger ATCC 1015 : 54072-mRNA, Aspergillus zonatus : Aspzo1_0027193 and Aspergillus carbonarius ITEM 5010 : Acar5010_206414	178	17.5943
An16g08150		Putative dipeptidyl-peptidase V; serine-type peptidase	631	17.5639
An13g00540		Ortholog of A. nidulans FGSC A4 : AN4253, A. fumigatus Af293 : Afu7g04060, A. oryzae RIB40 : AO090005000085, Aspergillus wentii : Aspwe1_0038478 and Aspergillus sydowii : Aspsy1_0032907	254	17.5338
An07g09810		Has domain(s) with predicted hydrolase activity	380	17.5193
An15g00520		Ortholog(s) have role in late endosome to vacuole transport via multivesicular body sorting pathway and Vps55/Vps68 complex, late endosome localization	170	17.48
An09g02800		Serine transacetylase/serine O-acetyltransferase	1585	17.4767
An16g07560		Has domain(s) with predicted nucleic acid binding, zinc ion binding activity	450	17.4675
An08g04310		Has domain(s) with predicted N-acetyltransferase activity	314	17.4651
An02g03760		Ortholog(s) have ATP-dependent peptidase activity and role in chaperone-mediated protein complex assembly, mitochondrial protein catabolic process, protein quality control for misfolded or incompletely synthesized proteins	929	17.4624
An12g10240		Protein with similarity to N. crassa conidiation protein; expressed in germinating conidia	102	17.4613
An04g06940	prtT	Member of the fungal-specific Zn2Cys6-binuclear cluster protein family; transcriptional activator of proteases	586	17.4606
An01g09240		Ortholog of A. nidulans FGSC A4 : AN6413, AN6419, AN6946, AN5312, AN5664, AN8328, AN3241, AN10369, AN1930, AN2386, AN1738, AN11159, AN8984, AN8951, AN1540, AN8971, AN9387, AN9266, AN9306, AN1317, AN10886, AN7232, AN7774, AN12202	347	17.4466
An16g03290		Has domain(s) with predicted DNA-binding transcription factor activity, RNA polymerase II-specific, zinc ion binding activity, role in regulation of transcription, DNA-templated and nucleus localization	592	17.444
An06g01190		Ortholog(s) have 1-phosphatidylinositol 4-kinase activator activity, calcium ion binding activity	280	17.4429
An01g11830		Ortholog of Aspergillus tubingensis : Asptu1_0041211, Aspergillus brasiliensis : Aspbr1_0039523, Aspergillus kawachii : Aspka1_0177512 and Aspergillus acidus : Aspfo1_0043006	287	17.4035
An02g13460		Ortholog(s) have vitamin transmembrane transporter activity, role in vitamin transport and plasma membrane localization	437	17.3856
An05g00200		Ortholog(s) have G-protein beta/gamma-subunit complex binding, palmitoyltransferase activity	692	17.3349
An14g03960		Protein of unknown function	253	17.315
An13g01680		Has domain(s) with predicted aldehyde-lyase activity and role in carbohydrate metabolic process	663	17.2936
An12g09980		Protein of unknown function	721	17.2881
An11g04410		Ortholog of A. nidulans FGSC A4 : AN2070, A. fumigatus Af293 : Afu2g04750, A. oryzae RIB40 : AO090003000278, Aspergillus wentii : Aspwe1_0718370 and Aspergillus sydowii : Aspsy1_0142154	548	17.2798
An02g10190		Ortholog(s) have U2-type spliceosomal complex, spliceosomal complex localization	282	17.2643
An12g01940		Ortholog(s) have role in DNA double-strand break processing, DNA repair, cellular response to oxidative stress, mitotic G2 DNA damage checkpoint and Mre11 complex, nucleus localization	545	17.2534
An02g10730		Ortholog of A. nidulans FGSC A4 : AN8034, A. fumigatus Af293 : Afu5g02210, A. oryzae RIB40 : AO090102000294, Aspergillus wentii : Aspwe1_0114775 and Aspergillus sydowii : Aspsy1_0033693	469	17.2111
An11g09760		Ortholog(s) have role in protein lipoylation	337	17.2011
An14g03180	cdc3	Profilin	203	17.1685
An02g14010		Ortholog of A. nidulans FGSC A4 : AN7476, A. fumigatus Af293 : Afu2g05630, A. oryzae RIB40 : AO090001000675, Aspergillus wentii : Aspwe1_0120551 and Aspergillus sydowii : Aspsy1_0058449	352	17.1445
An14g06600		Ortholog of A. oryzae RIB40 : AO090120000385, Aspergillus niger ATCC 1015 : 53901-mRNA, Aspergillus brasiliensis : Aspbr1_0141046 and Aspergillus tubingensis : Asptu1_0034336	385	17.1314
An09g06860		Has domain(s) with predicted DNA binding activity, role in DNA recombination, double-strand break repair and nucleus localization	355	17.1208
An16g07220		Ortholog(s) have RNA polymerase II complex binding activity	360	17.0655
An14g00610		Protein of unknown function	1228	16.9944
An11g01410		Has domain(s) with predicted hydrolase activity, hydrolase activity, acting on carbon-nitrogen (but not peptide) bonds activity	434	16.991
An07g08390		Putative oxaloacetate acetyl hydrolase; (2R,3S)-dimethylmalate lyase (DMML)	258	16.9662
An15g05690		Ortholog(s) have fungal biofilm matrix localization	241	16.9479
An09g06810		Has domain(s) with predicted zinc ion binding activity, role in DNA repair, nucleotide-excision repair, transcription, DNA-templated and transcription factor TFIIH core complex localization	403	16.9407
An01g12990		Ortholog(s) have glucosaminyl-phosphatidylinositol O-acyltransferase activity, role in GPI anchor biosynthetic process, cellular response to drug and integral component of membrane localization	529	16.9316
An02g03570		Protein of unknown function; expression repressed by tunicamycin and DTT	291	16.9075
An11g03380		Ortholog of A. fumigatus Af293 : Afu3g14990, A. oryzae RIB40 : AO090020000148, Aspergillus wentii : Aspwe1_0108252 and Aspergillus sydowii : Aspsy1_0047733	257	16.8484
An02g01670		Protein of unknown function	150	16.8331
An03g03640		Ortholog(s) have FAD binding, sulfide:quinone oxidoreductase activity	581	16.8172
An03g01700		Ortholog of Aspergillus niger ATCC 1015 : 45728-mRNA and Aspergillus carbonarius ITEM 5010 : Acar5010_172870	420	16.8035
An11g04470		Has domain(s) with predicted nucleus localization	718	16.7998
An14g04540		Protein of unknown function	161	16.798
An07g07100		Ortholog(s) have protein-lysine N-methyltransferase activity and role in peptidyl-lysine dimethylation, peptidyl-lysine monomethylation, vesicle-mediated transport	329	16.7794
An08g10690		Putative mitochondrial NADH ubiquinone reductase, 40 kDa subunit; repressed by growth on starch and lactate	405	16.7491
An14g04790		Has domain(s) with predicted peptidyl-prolyl cis-trans isomerase activity, ubiquitin-protein transferase activity and role in protein folding, protein peptidyl-prolyl isomerization, protein ubiquitination	516	16.7081
An11g07340		Protein similar to O-methyl transferases; expression repressed by tunicamycin and DTT	196	16.687
An12g03750		Protein of unknown function	239	16.6423
An16g01600		Has domain(s) with predicted transmembrane transporter activity, role in transmembrane transport and integral component of membrane, membrane localization	447	16.6235
An07g08620		Ortholog of A. nidulans FGSC A4 : AN3788, A. oryzae RIB40 : AO090005001524, Aspergillus wentii : Aspwe1_0133750, Aspergillus versicolor : Aspve1_0041950 and Aspergillus niger ATCC 1015 : 39706-mRNA	163	16.5998
An04g01530	tvdA	Ortholog(s) have SNAP receptor activity	234	16.5835
An18g04870		Ortholog of S. cerevisiae : YGL242C, A. nidulans FGSC A4 : AN4220, A. fumigatus Af293 : Afu1g06370, A. oryzae RIB40 : AO090120000078 and Aspergillus wentii : Aspwe1_0152212	174	16.5828
An09g02050		Ortholog(s) have glyoxysome localization	256	16.5786
An03g06920		Ortholog(s) have role in filamentous growth, filamentous growth of a population of unicellular organisms, fungal-type cell wall organization and membrane localization	589	16.5608
An07g09660		Protein of unknown function	199	16.5453
An16g09190		Acetyl-CoA C-acetyltransferase	387	16.5182
An08g00640		Ortholog(s) have intracellular, plasma membrane localization	597	16.5095
An14g06860		Putative oxaloacetate transporter	390	16.5029
[truncated: 4,058 more rows]

## Sheet: Empty Vector
Gene_id	Gene_Symbol	Description	Empty_MappedReads	Empty_FPKM
An16g01820		Ortholog(s) have role in protein maturation, protein targeting to ER and endoplasmic reticulum, membrane, plasma membrane localization	10186293	780686
An07g01960		Putative stearoyl-CoA desaturase	2638222	90258
An07g07380		Has domain(s) with predicted nucleobase transmembrane transporter activity, transmembrane transporter activity, role in nucleobase transport, transmembrane transport and integral component of membrane, membrane localization	1497355	43034.4
An17g01420		Ortholog(s) have role in ER-dependent peroxisome organization, endoplasmic reticulum inheritance, endoplasmic reticulum organization and endoplasmic reticulum tubular network membrane organization, more	422131	38823
An02g06980		Ortholog(s) have endoribonuclease activity, role in RNA catabolic process, apoptotic process, cell morphogenesis and cytosol, extracellular region, fungal-type vacuole, vacuole localization	827322	36957
An07g08960		Ortholog(s) have role in fungal-type cell wall organization and cell cortex of cell tip, membrane raft, plasma membrane localization	710384	33554.9
An15g03940		Putative monosaccharide transporter; AmyR dependant induction on maltose	912378	27016.6
An15g04690		Ortholog(s) have palmitoyltransferase activity, role in protein palmitoylation and endoplasmic reticulum localization	631695	25003.5
An15g04480		Ortholog(s) have intracellular localization	267400	21550.1
An01g00340		Has domain(s) with predicted transmembrane transporter activity, role in transmembrane transport and integral component of membrane localization	548156	21372.2
An15g02150		Protein of unknown function	389669	18517.8
An12g07450	mstA	High affinity sugar/H+ symporter; regulated by extracellular pH	529923	15603
An09g06730		Has domain(s) with predicted role in amino acid transport, transmembrane transport and integral component of membrane, membrane localization	408801	11706
An08g08600		Protein of unknown function; expression repressed by tunicamycin and DTT	227142	10893.6
An16g01830	gpdA	Glyceraldehyde-3-phosphate dehydrogenase	233689	10841.7
An08g06125		Protein of unknown function	67770	7461.73
An12g07530		Has domain(s) with predicted ferrous iron binding, oxidoreductase activity and role in cellular aromatic compound metabolic process	64852	7140.45
An11g02700		Protein of unknown function	167932	5304.18
An02g07250	agaA	Arginase	90130	4335.87
An18g01000		Protein of unknown function; expression repressed by tunicamycin and DTT	77412	4246.72
An18g06600		Has domain(s) with predicted nucleic acid binding, nucleotide binding activity	44856	3559.96
An08g06120		Protein of unknown function	54583	2539.85
An12g10200		Putative cell wall protein with internal repeats; induced by caspofungin	39102	1863.87
An01g08430		Ortholog(s) have mitochondrion localization	40915	1064.38
An18g04840		Protein similar to elongation factor 1 alpha	20864	707.599
An15g07090		Ortholog of A. niger CBS 513.88 : An12g10350, Neosartorya fischeri NRRL 181 : NFIA_091810, Aspergillus wentii : Aspwe1_0171052 and Aspergillus versicolor : Aspve1_0080842	3397	632.276
An18g06610	atg10	E2-like conjugating enzyme; predicted role in autophagy	6061	607.449
An03g06210		Ortholog of A. fumigatus Af293 : Afu8g02120, Neosartorya fischeri NRRL 181 : NFIA_095790, Aspergillus wentii : Aspwe1_0046719 and Aspergillus versicolor : Aspve1_0089590	2964	454.327
An16g05930		Ortholog of A. nidulans FGSC A4 : AN3975, AN9193/llmJ, AN2891 and A. fumigatus Af293 : Afu1g10150, Afu2g04380, Afu3g15150, Afu3g15280, Afu6g03300	7548	392.063
An08g06960		Ortholog(s) have role in DNA methylation, cellular response to DNA damage stimulus, global genome nucleotide-excision repair, rRNA transcription and regulation of DNA methylation, more	2922	333.465
An18g05640		Ortholog of A. nidulans FGSC A4 : AN4252, AN10165, A. fumigatus Af293 : Afu1g06580/hel10, Afu1g11910, A. niger CBS 513.88 : An08g04120 and A. oryzae RIB40 : AO090001000456, AO090001000373	3842	301.852
An02g01550		Secreted serine protease	2440	254.325
An11g11310		Ortholog(s) have nucleus, replication fork protection complex, site of double-strand break localization	1905	209.748
An14g01820	phiA	Putative cell wall protein similar to A. nidulans phiA; abundantly expressed on d-xylose; induced by caspofungin	2443	206.463
An07g06470		Protein of unknown function	2216	206.23
An01g00750		Ortholog of Aspergillus tubingensis : Asptu1_0054330, Aspergillus brasiliensis : Aspbr1_0040606, Aspergillus kawachii : Aspka1_0182240 and Aspergillus acidus : Aspfo1_0040371	990	188.761
An04g06510		Ortholog of A. nidulans FGSC A4 : AN2000/ubi4, A. fumigatus Af293 : Afu4g10350/ubiD, A. oryzae RIB40 : AO090003001182/ubiB, Aspergillus wentii : Aspwe1_0047475 and Aspergillus sydowii : Aspsy1_0053937	3423	174.894
An13g01520		Protein of unknown function; expression repressed by tunicamycin and DTT	2428	170.996
An18g05000		Ortholog of A. nidulans FGSC A4 : AN10518, A. fumigatus Af293 : Afu1g06350, A. oryzae RIB40 : AO090001000412, Neosartorya fischeri NRRL 181 : NFIA_018360 and Aspergillus wentii : Aspwe1_0038230	2066	170.907
An02g05240		Ortholog(s) have role in histone H3-K79 methylation, sexual sporulation resulting in formation of a cellular spore, transfer RNA gene-mediated silencing and nucleus, replication fork protection complex localization	1124	168.975
An18g05680		Ortholog(s) have role in iron-sulfur cluster assembly, lipoate biosynthetic process, long-chain fatty acid biosynthetic process, mitochondrial respiratory chain complex I assembly	1445	163.711
An14g01068		Ortholog(s) have extracellular region localization	1679	157.19
An01g05230		Ortholog(s) have role in hyphal growth, response to cold, response to heat, response to oxidative stress, response to salt stress, sporocarp development involved in sexual reproduction	1755	146.732
An01g03160		Ortholog(s) have structural constituent of ribosome activity, role in maturation of SSU-rRNA from tricistronic rRNA transcript (SSU-rRNA, 5.8S rRNA, LSU-rRNA) and cell surface, cytosolic small ribosomal subunit localization	1844	143.435
An01g12530	sodB	Manganese superoxide dismutase	1861	137.897
An07g03660		Protein of unknown function	2311	136.863
An04g04390		Has domain(s) with predicted catalytic activity and role in metabolic process	1573	125.477
An09g05870	ndk1	Nucleoside-diphosphate kinase	1140	115.738
An08g03430		Ortholog(s) have RNA binding, structural constituent of ribosome activity	1497	115.296
An17g02240		Ortholog(s) have RNA binding activity, role in ribosomal large subunit assembly and cytosolic large ribosomal subunit, preribosome, large subunit precursor localization	1143	115.294
An04g00930		Ortholog of A. nidulans FGSC A4 : AN2913, AN4375, A. fumigatus Af293 : Afu3g07740, Afu4g06610, A. oryzae RIB40 : AO090023000927, AO090020000420 and Aspergillus wentii : Aspwe1_0041960, Aspwe1_0076983	1876	103.642
An14g01840		Ortholog of A. nidulans FGSC A4 : AN3215, AN7166, AN8609, A. fumigatus Af293 : Afu3g14210, Afu4g03360, Afu4g12510 and A. niger CBS 513.88 : An09g04200	1302	102.294
An11g11300		Ortholog(s) have DNA binding activity and role in DNA repair, mitotic chromosome condensation, positive regulation of DNA repair, protein localization to kinetochore	859	99.4832
An09g01230		Ortholog of A. nidulans FGSC A4 : AN2535, A. fumigatus Af293 : Afu3g14660, Aspergillus wentii : Aspwe1_0107397, Aspwe1_0171355 and Aspergillus sydowii : Aspsy1_0087029	542	97.4026
An07g03570		Putative to sorbitol utilization protein	1795	95.4569
An08g02470		Ortholog(s) have role in maturation of LSU-rRNA from tricistronic rRNA transcript (SSU-rRNA, 5.8S rRNA, LSU-rRNA) and cytosolic large ribosomal subunit, preribosome, large subunit precursor localization	753	94.1836
An01g13190		Ortholog(s) have structural constituent of ribosome activity, role in rRNA export from nucleus and cytosolic small ribosomal subunit, extracellular region, membrane localization	1298	93.9531
An14g00010	srgA	Putative Rab GTPase; required for protein secretion on glucose but not on maltodextrin as carbon source; induced by caspofungin	1239	93.5818
An02g10790	pre6	20S CP alpha subunit of the proteasome	1616	93.2314
An16g04200	rho2	Putative GTP-binding protein; induced by caspofungin	1146	90.4919
An01g08510		Ortholog of A. nidulans FGSC A4 : AN3585, A. fumigatus Af293 : Afu4g12940, A. oryzae RIB40 : AO090009000293, Neosartorya fischeri NRRL 181 : NFIA_103400 and Aspergillus versicolor : Aspve1_0862034	700	90.4488
An15g06100		Ortholog of A. nidulans FGSC A4 : AN12198, A. fumigatus Af293 : Afu2g15810, Aspergillus wentii : Aspwe1_0026874 and Aspergillus sydowii : Aspsy1_0026968	669	90.1693
An12g07470		Ortholog of A. oryzae RIB40 : AO090026000772, Neosartorya fischeri NRRL 181 : NFIA_049400, Aspergillus wentii : Aspwe1_0168197 and Aspergillus clavatus NRRL 1 : ACLA_097350	635	89.4419
An01g04920		Ortholog(s) have structural constituent of ribosome activity, role in cytoplasmic translation and cytosolic large ribosomal subunit localization	376	89.0706
An11g09120		Ortholog(s) have RNA binding, structural constituent of ribosome activity, role in cytoplasmic translation and cytosolic large ribosomal subunit, yeast-form cell wall localization	752	87.0912
An07g05820		Ortholog of A. nidulans FGSC A4 : AN4578/usgS, A. fumigatus Af293 : Afu2g02010/usgS, A. oryzae RIB40 : AO090011000471, Aspergillus wentii : Aspwe1_0173282 and Aspergillus sydowii : Aspsy1_0059300	2021	86.0975
An16g05020		Inositol hexaki-/heptaki-phosphate kinase	1418	85.9304
An11g03060		Salicylate hydroxylase with a predicted role in salicylic acid degradation	2249	85.5535
An15g02040		Ortholog of A. nidulans FGSC A4 : AN6657, A. fumigatus Af293 : Afu6g03400, Neosartorya fischeri NRRL 181 : NFIA_049930, Aspergillus wentii : Aspwe1_0168205 and Aspergillus versicolor : Aspve1_0086179	507	84.3277
An02g03310		Ortholog(s) have role in intracellular sterol transport and extracellular region, fungal-type vacuole lumen localization	926	82.73
An15g00400		Ortholog of A. nidulans FGSC A4 : AN6524, A. fumigatus Af293 : Afu6g04930, A. oryzae RIB40 : AO090701000045, Aspergillus wentii : Aspwe1_0036161 and Aspergillus sydowii : Aspsy1_0037126	781	82.5049
An15g06740		Ortholog(s) have structural constituent of ribosome activity, role in translation and cytosolic large ribosomal subunit localization	693	82.0823
An02g12850		Protein of unknown function	2423	81.8206
An01g04740		Ortholog(s) have role in ribosomal large subunit assembly and cytosolic large ribosomal subunit localization	865	81.4701
An16g07080		Ortholog of A. nidulans FGSC A4 : AN1549, A. fumigatus Af293 : Afu8g05600, A. oryzae RIB40 : AO090005000583, Aspergillus wentii : Aspwe1_0187131 and Aspergillus sydowii : Aspsy1_0086712	426	81.2243
An04g10250		Has domain(s) with predicted N-acetyltransferase activity	1386	79.6681
An11g10090		Ortholog(s) have ribosomal small subunit binding, translation initiation factor activity, translation initiation factor binding activity and role in formation of translation preinitiation complex, maintenance of translational fidelity	570	77.4939
An02g07010		Protein similar to ubiquitin UBI1 of A. nidulans	754	76.0554
An06g01610		Putative heat shock protein	436	75.7416
An11g00040		Ortholog of A. nidulans FGSC A4 : AN3008, A. oryzae RIB40 : AO090011000565, Aspergillus niger ATCC 1015 : 46090-mRNA, 52849-mRNA and Aspergillus carbonarius ITEM 5010 : Acar5010_204950	556	75.5905
An08g02300		Protein of unknown function	1338	74.9795
An04g08980		Ortholog(s) have cytosolic large ribosomal subunit localization	446	74.9795
An02g08310		Has domain(s) with predicted oxidoreductase activity, transferase activity, transferring acyl groups other than amino-acyl groups, zinc ion binding activity and role in oxidation-reduction process	1663	74.2873
An18g06250	eno1	Phosphopyruvate hydratase	2070	73.7218
An17g01945		Ortholog(s) have role in actin filament organization, hyphal growth, mitotic actomyosin contractile ring assembly, small GTPase mediated signal transduction, syncytium formation by plasma membrane fusion	1235	73.6981
An18g04790		Ortholog(s) have disulfide oxidoreductase activity, glutathione disulfide oxidoreductase activity, glutathione peroxidase activity, glutathione transferase activity	491	73.111
An01g06280		Ortholog(s) have role in hyphal growth, response to cold, response to heat, response to oxidative stress, response to salt stress, sporocarp development involved in sexual reproduction	902	72.3206
An11g10610		Has domain(s) with predicted transferase activity, transferring glycosyl groups activity	1478	71.9879
An04g08060		Protein of unknown function	966	71.5789
An04g06570		Ortholog(s) have histidine phosphotransfer kinase activity, transferase activity, transferring phosphorus-containing groups activity and role in osmosensory signaling via phosphorelay pathway, response to osmotic stress	805	69.5357
An02g04580		Has domain(s) with predicted hydrolase activity	1118	69.3636
An17g02390		Cytoplasmic ribosomal protein of the small subunit RP10B	1019	69.2686
An07g03890		Ortholog(s) have ubiquitin protein ligase activity, ubiquitin-protein transferase activity	1010	68.3596
An12g07830		Ortholog(s) have RNA binding activity and cytosolic large ribosomal subunit localization	698	68.2065
An11g10150		Phosphoribosyl amino imidazolesuccinocarbozamide synthetase	1294	67.2137
An01g00370	pepAb	Pepsin family secreted protease; only detected under starvation conditions	1806	66.1272
An02g04320		Ortholog(s) have role in DNA strand elongation involved in DNA replication, UV-damage excision repair and Elg1 RFC-like complex localization	1491	66.0379
An03g06410	erg25	Putative C-4 methyl sterol oxidase; induced by fenpropimorph	1272	65.8522
An08g10470		Ortholog(s) have role in Golgi to vacuole transport, pathogenesis, protein targeting to vacuole and AP-3 adaptor complex localization	770	64.7244
An15g04510		Ortholog of A. nidulans FGSC A4 : AN1559, A. fumigatus Af293 : Afu8g05670, A. oryzae RIB40 : AO090005000575, Aspergillus wentii : Aspwe1_0141349 and Aspergillus sydowii : Aspsy1_0146079	1173	64.3493
An02g05150		Has domain(s) with predicted cholestenol delta-isomerase activity, role in sterol metabolic process and endoplasmic reticulum, integral component of membrane localization	1227	63.1046
An02g11960		Ortholog(s) have mitochondrion localization	1017	63.0973
An09g05420		Putative signal peptidase complex subunit; expression enhanced by maltose; expression induced by tunicamycin and DTT	1001	62.8529
An09g06410		Ortholog of A. nidulans FGSC A4 : AN9521, AN0790, A. fumigatus Af293 : Afu5g03750, A. oryzae RIB40 : AO090102000585 and Aspergillus wentii : Aspwe1_0174463	1032	62.7823
An14g00280		Hypoxanthine phosphoribosyltransferase with a role in the salvage pathways for nucleotides	816	62.2338
An16g08740		Ortholog(s) have mitochondrion localization	686	61.9967
An09g03120		Protein of unknown function	1089	61.9135
An14g00270		Putative dolichyl-phosphate mannosyltransferase; expression enhanced by maltose	526	61.8336
An04g04040		Ortholog(s) have protein disulfide oxidoreductase activity, thioredoxin-disulfide reductase activity and role in negative regulation of transcription by RNA polymerase II, proteasome-mediated ubiquitin-dependent protein catabolic process	1398	61.3971
An02g14970		Has domain(s) with predicted oxidoreductase activity, zinc ion binding activity and role in oxidation-reduction process	1319	61.1935
An12g04780		NADH-ubiquinone oxidoreductase; respiratory-chain NADH dehydrogenase	1045	60.5122
An07g10020	atg8	Putative autophagy-related ubiquitin modifier; autophagosomal membrane protein; essential for autophagy	460	60.4368
An10g00820	oahA	Oxaloacetate acetylhydrolase	1306	59.7045
An11g00890		Ortholog of A. oryzae RIB40 : AO090023000241, Neosartorya fischeri NRRL 181 : NFIA_056230, Aspergillus wentii : Aspwe1_0039389 and Aspergillus clavatus NRRL 1 : ACLA_084080	735	59.5416
An16g00850		Ortholog of A. nidulans FGSC A4 : AN5938, A. fumigatus Af293 : Afu5g01380, A. oryzae RIB40 : AO090701000476, Aspergillus wentii : Aspwe1_0588663 and Aspergillus sydowii : Aspsy1_0085137	888	59.0793
An18g01090		Has domain(s) with predicted phospholipase activity and role in metabolic process, phospholipid catabolic process	2344	59.0142
An18g05020		Ortholog(s) have cytosolic large ribosomal subunit, small-subunit processome localization	511	58.7452
An15g00080		Ortholog of A. nidulans FGSC A4 : AN6500, A. fumigatus Af293 : Afu6g05200, A. oryzae RIB40 : AO090701000014, Aspergillus wentii : Aspwe1_0104135 and Aspergillus sydowii : Aspsy1_0037102	578	58.681
An04g09420		Ortholog of A. nidulans FGSC A4 : AN2821, A. fumigatus Af293 : Afu2g00180, Afu2g17480, A. niger CBS 513.88 : An03g05360 and A. oryzae RIB40 : AO090102000063, AO090009000716	1701	58.194
An14g04180		F1F0-ATPase complex subunit	674	57.5836
An03g06870		Cytidine deaminase	524	57.2909
An16g03330		Ortholog(s) have fungal-type cell wall localization	663	57.2698
An01g03460		Ortholog(s) have RNA binding, structural constituent of ribosome activity, role in cytoplasmic translation, macroautophagy and cytosolic large ribosomal subunit localization	745	57.0974
An01g03770		Dynein light chain; induced by caspofungin	343	56.4496
An18g05980	rhoA	Ras GTPase	698	56.2528
An02g10750		Cysteine synthase	1326	55.5808
An04g05850		Ortholog(s) have structural constituent of ribosome activity and role in maturation of SSU-rRNA from tricistronic rRNA transcript (SSU-rRNA, 5.8S rRNA, LSU-rRNA)	838	55.05
An03g02360	hfbB	Putative hydrophobin	428	54.4038
An04g06670		Ortholog(s) have mRNA binding activity and role in mRNA splicing, via spliceosome	407	54.3875
An04g02140		Ortholog(s) have pyruvate transmembrane transporter activity, role in mitochondrial pyruvate transmembrane transport and integral component of mitochondrial inner membrane localization	430	53.3566
An18g06650		Putative heat shock protein	655	52.7874
An05g00770		Putative ubiquitin-like protein; repressed by growth on starch and lactate	266	52.6435
An03g02980		Putative thioredoxin	471	52.5997
An12g07810		Ortholog(s) have ubiquitin conjugating enzyme activity, ubiquitin protein ligase activity, ubiquitin-protein transferase activity	501	52.22
An02g05620		Has domain(s) with predicted identical protein binding, serine-type endopeptidase activity and role in negative regulation of catalytic activity	239	51.8986
An02g01870		Ortholog(s) have role in lipid droplet disassembly	631	51.6519
An16g04690		Ortholog(s) have role in ribosomal small subunit assembly	460	51.3713
An06g00990		Putative fumarate reductase	1571	50.6436
An04g01430		Has domain(s) with predicted nucleic acid binding activity	814	50.5027
An02g04260		Ortholog(s) have protein carrier activity, protein transporter activity and role in protein insertion into mitochondrial inner membrane	323	50.5002
An07g07840		Ortholog(s) have cytosol, cytosolic large ribosomal subunit, hyphal cell wall, nucleus localization	455	50.4525
An11g06970		Protein of unknown function; expression induced by tunicamycin and DTT	860	50.3591
An02g09190		Ortholog(s) have structural constituent of ribosome activity and mitochondrial membrane, mitochondrial small ribosomal subunit localization	955	49.7706
An03g06550	glaA	1,4-alpha-D-glucan glucohydrolase; secreted glucoamylase; most highly expressed at the periphery of colonies; repressed by xylose and induced by maltose; AmyR dependant induction on maltose	2037	49.6848
An09g06680	citA	Putative citrate synthase; predicted N-terminal mitochondrial import signal and a C-terminal peroxisomal target sequence (AKL)	1505	49.5374
An04g00110		NADH-ubiquinone oxidoreductase; respiratory-chain NADH dehydrogenase	878	48.8516
An15g00990		Ortholog(s) have acireductone dioxygenase (Ni2+-requiring) activity and role in L-methionine salvage from methylthioadenosine	554	48.389
An16g04550		Ortholog of A. nidulans FGSC A4 : AN4931, A. fumigatus Af293 : Afu3g10580, A. oryzae RIB40 : AO090003000603, Aspergillus wentii : Aspwe1_0057684 and Aspergillus sydowii : Aspsy1_0056492	992	48.1666
An01g03780		Protein of unknown function	695	48.0802
An18g06700	pre7	20S CP beta subunit of the proteasome	799	47.8626
An02g12940		Ortholog of A. oryzae RIB40 : AO090011000065, Aspergillus clavatus NRRL 1 : ACLA_006700, Aspergillus niger ATCC 1015 : 52445-mRNA and Aspergillus carbonarius ITEM 5010 : Acar5010_516919	772	47.5197
An01g01150		Protein of unknown function	1527	46.5385
An07g05290		Ortholog(s) have structural constituent of ribosome activity and mitochondrial large ribosomal subunit, mitochondrial membrane, mitochondrial ribosome localization	1072	46.4278
An08g10010		Ortholog(s) have role in syncytium formation by plasma membrane fusion	534	45.8733
An18g03810		Ortholog(s) have RNA binding activity	592	45.5949
An13g02250		Ortholog(s) have extracellular region localization	1006	45.59
An13g02730		Ortholog of A. nidulans FGSC A4 : AN8483, Neosartorya fischeri NRRL 181 : NFIA_001870, Aspergillus wentii : Aspwe1_0175506 and Aspergillus versicolor : Aspve1_0088786	233	44.974
An11g09570		Protein similar to cytoplasmic ribosomal protein of the large subunit L37.b	267	44.8868
An12g07840	gnaA	Putative glucosamine-6-phosphate N-acetyltransferase; induced by caspofungin	518	44.7447
An04g00520		Protein of unknown function	744	44.568
An18g04310		Ortholog(s) have structural constituent of ribosome activity and cytosolic small ribosomal subunit localization	429	44.4192
An02g02820		Enoyl-CoA hydratase	828	43.8832
An14g06090		Ortholog of A. nidulans FGSC A4 : AN6859, A. fumigatus Af293 : Afu5g13070, A. oryzae RIB40 : AO090120000432, Aspergillus wentii : Aspwe1_0107789 and Aspergillus sydowii : Aspsy1_0085559	1091	43.514
An11g09880		Protein of unknown function; induced by growth on starch and lactate	597	43.4136
An07g06230		Ortholog of A. fumigatus Af293 : Afu8g02490, Aspergillus brasiliensis : Aspbr1_0054487, Neosartorya fischeri NRRL 181 : NFIA_096210 and Aspergillus fumigatus A1163 : AFUB_084100	707	43.3481
An13g00760	tpm1	Tropomyosin	447	43.1403
An02g02960	acbp	Acyl-CoA-binding type 2 protein	398	42.9146
An06g01870		Ortholog(s) have role in rRNA export from nucleus and cell surface localization	424	42.7685
An07g09050		Ortholog of A. nidulans FGSC A4 : AN6760, AN8527, A. fumigatus Af293 : Afu4g01400, Afu5g02670, Afu5g14240, A. niger CBS 513.88 : An08g09630 and Aspergillus wentii : Aspwe1_0069899, Aspwe1_0185315, Aspwe1_0186212	619	42.4469
An09g06760		Ortholog of A. nidulans FGSC A4 : AN8281, A. fumigatus Af293 : Afu5g04290, A. oryzae RIB40 : AO090102000635, Aspergillus wentii : Aspwe1_0043150 and Aspergillus sydowii : Aspsy1_0094483	794	42.2244
An06g01000		Protein related to chitinases; expression repressed by tunicamycin and DTT; highly expressed in germinating conidia	678	41.57
An03g04280		Protein with similarity to pyridoxine synthesis component pyroA of Aspergillus nidulans	814	41.0538
An12g05020	hfbE	Putative hydrophobin	168	41.0412
An11g02785		Ortholog of A. nidulans FGSC A4 : AN10508, Neosartorya fischeri NRRL 181 : NFIA_053590, Aspergillus wentii : Aspwe1_0177107 and Aspergillus versicolor : Aspve1_0138892	253	40.3631
An08g06940		Putative histone H4.1	268	40.2895
An11g11170		Ortholog(s) have structural constituent of ribosome activity and mitochondrial large ribosomal subunit, mitochondrial ribosome localization	520	40.2478
An08g08760		Ortholog(s) have guanyl-nucleotide exchange factor activity and role in mature ribosome assembly	885	40.2231
An02g09310		Ortholog(s) have role in cellular response to oxidative stress and fungal-type vacuole lumen, plasma membrane localization	882	39.855
An13g01530		Ortholog of A. nidulans FGSC A4 : AN3616, A. fumigatus Af293 : Afu3g00350, Aspergillus wentii : Aspwe1_0143920, Aspergillus sydowii : Aspsy1_0040713 and Aspergillus terreus NIH2624 : ATET_02895	261	39.6181
An08g00610		Ortholog(s) have structural constituent of ribosome activity, role in cytoplasmic translation and cytosolic large ribosomal subunit localization	483	39.1273
An03g06830		Has domain(s) with predicted translation initiation factor activity and role in translational initiation	491	38.771
An01g07350		Ortholog(s) have ubiquitin conjugating enzyme activity, ubiquitin-protein transferase activity and role in free ubiquitin chain polymerization, postreplication repair, protein K63-linked ubiquitination, protein polyubiquitination	344	38.4168
An11g11030		Ortholog(s) have RNA binding activity and cytosolic large ribosomal subunit, nucleus localization	366	38.1487
An16g04930		Ortholog(s) have protein kinase activator activity, structural constituent of ribosome activity, role in cytoplasmic translation, positive regulation of protein kinase activity and cytosolic large ribosomal subunit, ribosome localization	268	37.7487
An05g02280		Ortholog(s) have extracellular region localization	904	37.5899
An12g08570	prxII	Type 2 peroxiredoxin	406	37.5604
An01g12330		Ortholog(s) have RNA binding, poly(U) RNA binding activity and role in mRNA splicing, via spliceosome, maturation of SSU-rRNA, nuclear-transcribed mRNA catabolic process	321	36.6332
An08g10990		Protein with similarity to dienelactone hydrolase	679	36.232
An06g01930		Ortholog(s) have structural constituent of ribosome activity and cytosolic small ribosomal subunit, yeast-form cell wall localization	132	36.2067
An17g01460		Ortholog of Aspergillus acidus : Aspfo1_0084770	271	35.9069
An07g04620		Ortholog(s) have role in conidiophore development, hyphal growth, regulation of MAP kinase activity, response to cold, response to heat, sporocarp development involved in sexual reproduction, syncytium formation by plasma membrane fusion	552	35.226
An07g07780		Ortholog(s) have ATPase inhibitor activity, enzyme inhibitor activity, role in negative regulation of ATPase activity and mitochondrion localization	226	34.3053
An14g03920		Ortholog(s) have structural constituent of ribosome activity and mitochondrial small ribosomal subunit localization	453	34.2151
An02g08030		Has domain(s) with predicted integral component of membrane localization	286	34.1338
An14g03180	cdc3	Profilin	287	33.9937
An01g03480	gutB	Sorbitol dehydrogenase	754	33.7782
An02g06390		Ortholog(s) have role in ribosome biogenesis and cell surface, small-subunit processome localization	425	33.0585
An11g01260		Has domain(s) with predicted metal ion transmembrane transporter activity, role in metal ion transport, transmembrane transport and membrane localization	1022	32.4111
An01g02880	cep52	Cytoplasmic ubiquitin / ribosomal fusion protein	266	32.2391
An07g09430		Protein of unknown function	758	31.5189
An19g00210		Ortholog(s) have low-density lipoprotein particle binding activity, role in hemolysis by symbiont of host erythrocytes and intracellular localization	287	31.3788
An07g07580		Ortholog of A. nidulans FGSC A4 : AN4512, A. fumigatus Af293 : Afu2g03155, A. oryzae RIB40 : AO090120000271, Aspergillus wentii : Aspwe1_0155259 and Aspergillus sydowii : Aspsy1_0036813	318	31.074
An04g04870		Ortholog(s) have manganese ion binding, superoxide dismutase activity	460	30.9999
An08g00970	rps28	Ribosomal protein of the small subunit	289	30.9482
An02g01970		Ortholog(s) have role in exonucleolytic trimming to generate mature 3'-end of 5.8S rRNA from tricistronic rRNA transcript (SSU-rRNA, 5.8S rRNA, LSU-rRNA), nuclear polyadenylation-dependent tRNA catabolic process, rRNA catabolic process	753	30.4999
An02g05830	mpdA	Mannitol 1-phosphate dehydrogenase (MPD); the first enzyme in the mannitol biosynthesis pathway; expression increased in sporulating mycelium suggesting mannitol biosynthesis may be developmentally regulated; expressed in vegetative hyphae	757	30.4254
An12g05170		Ortholog of A. nidulans FGSC A4 : AN9208, AN9311, A. fumigatus Af293 : Afu5g14850, A. niger CBS 513.88 : An03g01320, An12g07240 and A. oryzae RIB40 : AO090023000071, AO090026000100	567	29.949
An01g06690		Ortholog(s) have low-affinity zinc ion transmembrane transporter activity, zinc ion transmembrane transporter activity	666	29.5816
An02g11300		Ortholog(s) have structural constituent of ribosome activity and mitochondrial large ribosomal subunit, mitochondrial ribosome localization	456	29.3392
An07g03880	pepC	Putative vacuolar serine proteinase; putative signal sequence for transport into the endoplasmic reticulum; secreted protein	899	28.2241
An15g01700		Ortholog(s) have phosphatidic acid binding, phosphatidylinositol-3,5-bisphosphate binding, phosphatidylinositol-3-phosphate binding, phosphatidylinositol-4-phosphate binding, unfolded protein binding activity	360	27.7266
An02g05610		Ortholog(s) have protein kinase activity, pyruvate dehydrogenase (acetyl-transferring) kinase activity and role in carbon utilization, cellular protein-containing complex assembly, peptidyl-serine phosphorylation, protein phosphorylation	746	27.6386
An02g08080		Has domain(s) with predicted structural constituent of ribosome activity, role in translation and ribosome localization	220	27.5171
An01g04240		Putative cytoplasmic acidic ribosomal protein P0	549	27.4232
An16g01810		Ortholog(s) have chromatin binding activity	242	27.2202
An04g01780		COPII vesicle component; expression enhanced by maltose	394	26.4381
An08g00540		Ortholog of A. nidulans FGSC A4 : AN1378, A. fumigatus Af293 : Afu1g09030, A. oryzae RIB40 : AO090005001622, Aspergillus wentii : Aspwe1_0024518 and Aspergillus sydowii : Aspsy1_0138364	293	26.0283
An16g04940		Ortholog(s) have role in rRNA export from nucleus	252	25.5841
An02g10320	nmt1	Ortholog(s) have thiamine pyrophosphate binding activity and role in hyphal growth, thiamine biosynthetic process	561	25.5717
An01g02500		Thioredoxin	177	25.3885
An01g00160	hacA	Transcription factor involved in regulation of the unfolded protein response; activates transcription of several genes involved in the UPR; during secretion stress, altered transcription start site relieves translational regulation of hacA	548	25.0521
An02g03380		Ortholog of A. nidulans FGSC A4 : AN1127, AN7386, A. fumigatus Af293 : Afu1g11740, A. niger CBS 513.88 : An08g03700 and A. oryzae RIB40 : AO090026000507	442	24.9478
An01g07230		Ortholog of A. fumigatus Af293 : Afu4g11940, A. oryzae RIB40 : AO090102000214, AO090003001021, Aspergillus wentii : Aspwe1_0166602 and Aspergillus sydowii : Aspsy1_0046673	476	24.5615
An07g04850		Ortholog of A. oryzae RIB40 : AO090011000170, Aspergillus versicolor : Aspve1_0046405, Aspergillus niger ATCC 1015 : 53274-mRNA and Aspergillus sydowii : Aspsy1_0159387	543	24.4659
An12g06930	amyA	Alpha-amylase (1, 4-alpha-D-glucan 4-glucanohydrolase), hydrolyzes the alpha-1,4-glucosidic bonds in glycogen or starch; identical to An05g02100	779	24.4077
An01g04710		Adenylate kinase	366	24.3503
An09g00600		Ortholog of A. nidulans FGSC A4 : AN0992, A. fumigatus Af293 : Afu8g01860, Neosartorya fischeri NRRL 181 : NFIA_095470 and Aspergillus wentii : Aspwe1_0043470, Aspwe1_0044332	474	23.6015
An15g00070	mdhA	Malate dehydrogenase precursor	499	23.4992
An18g04220		ADP/ATP translocase; antiporter	479	23.4032
An13g00630		Protein of unknown function	99	23.1021
An18g05860		Ortholog(s) have protein kinase activator activity, structural constituent of ribosome activity, role in cytoplasmic translation, positive regulation of protein kinase activity and cytosolic large ribosomal subunit, ribosome localization	158	22.6632
An07g05770		Protein of unknown function	144	22.0726
An01g00690		Ortholog(s) have DNA-binding transcription factor activity, RNA polymerase II-specific activity	518	21.5393
An07g07530	crhB	Putative GPI-anchored glucanosyltransferase; induced by caspofungin	574	21.1161
An12g07550		Protein of unknown function	312	20.2408
An01g10050	IgE-HRF	IgE-dependent histamine-releasing factor	221	18.985
An15g07710		Has domain(s) with predicted membrane localization	125	17.9297
An15g02880		Ortholog of A. nidulans FGSC A4 : AN5372, AN7785, A. fumigatus Af293 : Afu5g07450, Afu6g14060, A. niger CBS 513.88 : An08g08280, An12g10360 and A. oryzae RIB40 : AO090103000388, AO090701000652, AO090010000610	435	17.3498
An01g03130		Ortholog of A. fumigatus Af293 : Afu1g04300, A. oryzae RIB40 : AO090003000919, AO090701000446, Aspergillus wentii : Aspwe1_0025379 and Aspergillus terreus NIH2624 : ATET_06531	288	17.1863
An11g05230		Has domain(s) with predicted oxidoreductase activity and role in oxidation-reduction process	421	16.9209
An09g03370		Protein of unknown function	154	16.1594
An04g07430		Ortholog of A. nidulans FGSC A4 : AN5172, A. fumigatus Af293 : Afu4g09700, Afu6g07000, A. oryzae RIB40 : AO090012000946, AO090003001270 and Aspergillus wentii : Aspwe1_0166832	224	15.919
An07g05800		Putative signal recognition particle subunit; expression enhanced by maltose	134	15.8716
An02g07860		Ortholog(s) have role in filamentous growth, filamentous growth of a population of unicellular organisms, positive regulation of transcription by RNA polymerase II, regulation of filamentous growth of a population of unicellular organisms	1053	15.6645
An17g02350		Putative GTP-binding protein; induced by caspofungin	186	15.4684
An02g04870		Has domain(s) with predicted phosphatidylinositol phosphate kinase activity and role in phosphatidylinositol metabolic process	340	15.4529
An01g05060		Ortholog of A. nidulans FGSC A4 : AN10031, A. fumigatus Af293 : Afu1g02910, A. oryzae RIB40 : AO090005000782, Aspergillus wentii : Aspwe1_0169592 and Aspergillus sydowii : Aspsy1_0076110	358	15.2513
An14g04170		Cytochrome c oxidase subunit	102	15.188
An11g02990		Protein with similarity to cytochrome P450; expression induced by tunicamycin and DTT	524	14.8686
An04g04740		Ortholog of A. nidulans FGSC A4 : AN5572, A. fumigatus Af293 : Afu4g11640, Aspergillus wentii : Aspwe1_0047362, Aspergillus sydowii : Aspsy1_0057118 and Aspergillus terreus NIH2624 : ATET_03912	971	14.5554
An08g00070		Ortholog(s) have nuclear export signal receptor activity, role in protein export from nucleus and nuclear periphery, nucleus localization	998	14.5419
An08g10030		Protein of unknown function; induced by growth on starch and lactate	104	14.2633
An07g03100		Ortholog(s) have S-formylglutathione hydrolase activity, role in formaldehyde catabolic process and cytosol localization	258	13.9576
An14g06380		Protein of unknown function	322	13.5333
An15g03220		Ortholog(s) have 2 iron, 2 sulfur cluster binding, RNA polymerase II activating transcription factor binding, disulfide oxidoreductase activity, glutathione disulfide oxidoreductase activity, iron-sulfur cluster binding activity	235	13.4093
An05g01070		Ortholog(s) have role in regulation of phospholipid translocation and plasma membrane localization	261	12.7123
An02g12010	ipp1	Inorganic pyrophosphatase	232	12.5946
An01g00560		Putative signal peptidase complex subunit; expression enhanced by maltose; expression induced by tunicamycin and DTT	111	12.0518
An15g06020		Ortholog(s) have ATP binding, magnesium ion binding, ubiquitin activating enzyme activity, role in protein ubiquitination and cytoplasm, nucleus localization	792	11.964
An15g07040		Phospholipase D	924	11.8901
An11g01690		cytoplasmic ribosomal protein of the small subunit S4.e	46	11.4158
An12g00720		DNA-directed RNA polymerase	896	11.1446
An08g05730		Ortholog(s) have 5S rRNA binding, structural constituent of ribosome activity, role in ribosomal large subunit assembly and cytosolic large ribosomal subunit localization	213	11.0638
An02g12760		Ortholog(s) have ubiquitin protein ligase binding activity	303	10.7666
An04g05670		Ortholog(s) have role in cellular response to drug, filamentous growth, late endosome to vacuole transport via multivesicular body sorting pathway and fungal-type vacuole membrane localization	145	10.4472
An01g12420		Ortholog(s) have structural constituent of ribosome activity and role in cellular response to drug, cleavage in ITS2 between 5.8S rRNA and LSU-rRNA of tricistronic rRNA transcript (SSU-rRNA, 5.8S rRNA, LSU-rRNA), cytoplasmic translation	122	10.3105
An07g09110		Ortholog(s) have kynurenine 3-monooxygenase activity	320	10.0062
An12g00820	ugpA	Putative UTP-glucose-1-phosphate uridylyltransferase; Leloir pathway enzyme; induced by caspofungin	431	9.80869
An07g06530		Protein similar to multicopy suppressor Sur7p; expression repressed by tunicamycin and DTT	150	9.49477
An08g06230		Ortholog of A. nidulans FGSC A4 : AN0659, A. fumigatus Af293 : Afu1g13200, A. oryzae RIB40 : AO090012001040, Aspergillus wentii : Aspwe1_0051321 and Aspergillus sydowii : Aspsy1_0065853	842	8.86494
An17g01360		Ortholog(s) have structural constituent of ribosome activity, role in cytoplasmic translation and cytosolic large ribosomal subunit localization	134	8.2159
An08g00010	hemB	5-aminolevulinic acid dehydratase (porphobilinogen synthase)	182	7.58805
An12g02880		Has domain(s) with predicted DNA binding, DNA-binding transcription factor activity, RNA polymerase II-specific, zinc ion binding activity and role in regulation of transcription, DNA-templated, transcription, DNA-templated	301	7.49372
An02g14340		Ortholog(s) have RNA binding, U3 snoRNA binding, U4 snRNA binding activity	60	7.44511
An02g01830		Ortholog(s) have electron transfer activity and role in mitochondrial ATP synthesis coupled electron transport, mitochondrial electron transport, cytochrome c to oxygen, mitochondrial electron transport, ubiquinol to cytochrome c	53	7.3331
An01g13620		Glutathione synthetase	239	7.24167
An04g03180		Ortholog of A. nidulans FGSC A4 : AN1719, A. fumigatus Af293 : Afu4g08370, A. oryzae RIB40 : AO090701000366, Aspergillus wentii : Aspwe1_0102057, Aspwe1_0436878 and Aspergillus sydowii : Aspsy1_0074793	161	7.23331
An07g09710		Ortholog of A. nidulans FGSC A4 : AN5154, A. fumigatus Af293 : Afu1g07090, A. oryzae RIB40 : AO090012000961, Aspergillus wentii : Aspwe1_0155743 and Aspergillus sydowii : Aspsy1_0134266	717	7.23232
An15g06150		Ortholog of A. nidulans FGSC A4 : AN2166, A. fumigatus Af293 : Afu2g15850, A. oryzae RIB40 : AO090012000227, Aspergillus wentii : Aspwe1_0108220 and Aspergillus sydowii : Aspsy1_0140323	137	6.69362
An16g05050		Has domain(s) with predicted Ran GTPase binding activity, role in intracellular protein transport and nuclear pore localization	403	6.02371
An03g05260		Ortholog(s) have chitosan binding activity	120	5.8999
An04g07160		Has domain(s) with predicted phosphoric diester hydrolase activity and role in lipid metabolic process	141	5.86302
An02g03950		Ortholog(s) have role in maintenance of translational fidelity, rRNA processing, ribosomal large subunit assembly and cell surface, cytosolic large ribosomal subunit, small-subunit processome localization	130	5.17179
An13g01240		Has domain(s) with predicted DNA-binding transcription factor activity, nucleic acid binding, zinc ion binding activity, role in regulation of transcription, DNA-templated and nucleus localization	362	4.88332
An01g11820		Has domain(s) with predicted nucleic acid binding, nucleotide binding activity	168	4.50538
An17g00170		Ortholog of A. nidulans FGSC A4 : AN10975, A. fumigatus Af293 : Afu5g06970, A. oryzae RIB40 : AO090701000290, Aspergillus versicolor : Aspve1_0135244 and Aspergillus clavatus NRRL 1 : ACLA_010110	102	4.26402
An09g04470		Ortholog(s) have calcium-dependent cysteine-type endopeptidase activity, cysteine-type endopeptidase activity	111	4.01726
An09g04620		Ortholog of A. nidulans FGSC A4 : AN2492, A. fumigatus Af293 : Afu3g14020, A. oryzae RIB40 : AO090012000726, Aspergillus wentii : Aspwe1_0108589 and Aspergillus sydowii : Aspsy1_0148218	107	3.88148
An16g07410		F1F0-ATPase complex subunit	131	3.67711
An02g12640		Putative RNA-binding protein	116	3.35857
An15g00340		Ortholog(s) have oxidoreductase activity, role in cytochrome c-heme linkage, mitochondrial membrane organization and extrinsic component of mitochondrial inner membrane localization	81	3.27239
An01g05120		Protein of unknown function	37	2.89242
An04g06920	agdA	Extracellular alpha-glucosidase pro-protein; the mature form of the enzyme is a heterosubunit protein; AmyR dependant induction on maltose	176	2.79078
An02g11150	aglB	Putative alpha-galactosidase variant B; expression is induced on xylan; XlnR regulated	79	2.78185
An09g06200		Ortholog of A. nidulans FGSC A4 : AN6413, AN6419, AN6946, AN5312, AN5664, AN8328, AN3241, AN10369, AN1930, AN2386, AN1738, AN11159, AN8984, AN8951, AN1540, AN8971, AN9387, AN9266, AN9306, AN1317, AN10886, AN7232, AN7774, AN12202	67	2.69287
An02g09200		Ortholog(s) have structural constituent of ribosome activity	39	2.03931
An12g04750		Ortholog(s) have role in mitochondrion inheritance, negative regulation of proteolysis, protein folding, replicative cell aging and mitochondrial inner membrane, mitochondrial membrane, mitochondrion, plasma membrane localization	40	2.0371
An14g00960		Cysteine synthase	65	1.91386
An08g03490	ef1	Elongation factor 1 beta	37	1.90919
An08g03510		Protein of unknown function	42	1.90336
An18g06120		Putative secreted protein; expression induced by tunicamycin and DTT	51	1.64406
An14g01430		Ortholog of A. nidulans FGSC A4 : AN7139, A. fumigatus Af293 : Afu4g03730, A. oryzae RIB40 : AO090011000309, Aspergillus wentii : Aspwe1_0030342 and Aspergillus sydowii : Aspsy1_0034590	49	1.644
An02g10450		Protein with similarity to GTP-binding protein Vps1p of S. cerevisiae	73	1.55284
An12g01640		Protein of unknown function	52	1.53978
An07g02180		E2 dihydrolipoamide acetyltransferase	63	1.45708
An03g01310		CTP synthase	53	1.42869
An01g09460		Ortholog(s) have role in activation of MAPK activity involved in cell wall organization or biogenesis, asexual sporulation resulting in formation of a cellular spore and cellular response to drug, more	6	1.26768
An02g03110		Ortholog(s) have structural constituent of ribosome activity and mitochondrial large ribosomal subunit, mitochondrial ribosome localization	17	1.22484
An18g06820	gfaA	Putative glutamine:fructose-6-phosphate amidotransferase; responsible for the first and a rate-limiting step in chitin synthesis; induced by caspofungin	51	1.1473
An16g00100		Protein of unknown function	14	0.960027
An08g03600		Ortholog(s) have extracellular region localization	10	0.91969
An05g00750		Ortholog(s) have cytosolic large ribosomal subunit localization	6	0.876714
An04g02250		Protein of unknown function; expression induced by tunicamycin and DTT	4	0.679771
An15g07220		Has domain(s) with predicted DNA-binding transcription factor activity, RNA polymerase II-specific, zinc ion binding activity, role in regulation of transcription, DNA-templated and nucleus localization	17	0.529463
An02g12140	gsdA	Glucose-6-phosphate dehydrogenase; expression induced by growth on xylose; induced by growth on starch and lactate	17	0.520138
An08g00560		Methylene-fatty-acylphospholipid synthase	8	0.466708
An01g12240		Ortholog of A. nidulans FGSC A4 : AN2423, AN0736, A. fumigatus Af293 : Afu1g14230, Afu2g13800, A. niger CBS 513.88 : An02g05360 and A. oryzae RIB40 : AO090026000195	5	0.285305
An02g03540		Ortholog(s) have fructose transmembrane transporter activity, glucose transmembrane transporter activity, mannose transmembrane transporter activity	7	0.195086
An10g00680		Has domain(s) with predicted proton transmembrane transporter activity and role in proton transmembrane transport	2	0.189512
An04g05220		Ubiquinol-cytochrome c reductase	2	0.186128
An14g02090		Ortholog of Aspergillus wentii : Aspwe1_0739269, Aspergillus versicolor : Aspve1_0088438, Aspergillus sydowii : Aspsy1_0071565 and Aspergillus brasiliensis : Aspbr1_0220682	2	0.178683
An11g04810	aox1	Mitochondria-localized alternative oxidase; functions in a cyanide- and antimycin A-insensitive and salicylhydroxamic acid-sensitive respiratory pathway; constitutively expressed regardless of the glucose concentration	4	0.177667
An02g05640		Ortholog of A. nidulans FGSC A4 : AN6335, A. fumigatus Af293 : Afu2g13580, Aspergillus wentii : Aspwe1_0045453, Aspergillus sydowii : Aspsy1_0089786 and Aspergillus terreus NIH2624 : ATET_01338	3	0.150334
An03g00640		Ortholog of A. fumigatus Af293 : Afu2g17790, Neosartorya fischeri NRRL 181 : NFIA_093190, Aspergillus niger ATCC 1015 : 194162-mRNA and Aspergillus zonatus : Aspzo1_0112721, Aspzo1_0127952, Aspzo1_0154500	4	0.12763
An07g09170		Has domain(s) with predicted ATP binding, ATPase activity, nucleoside-triphosphatase activity, nucleotide binding activity and membrane localization	8	0.120848
An15g01840		Secoisolariciresinol dehydrogenase	2	0.111279
An09g04010	chsB	Putative chitin synthase, class III; induced by caspofungin	6	0.102523
An04g05930		Ortholog(s) have oxidoreductase activity, role in very long-chain fatty acid metabolic process and endoplasmic reticulum membrane localization	2	0.100869
An02g07330		Ortholog of Aspergillus tubingensis : Asptu1_0028933, Aspergillus flavus NRRL 3357 : AFL2T_02306, Aspergillus kawachii : Aspka1_0179093 and Aspergillus carbonarius ITEM 5010 : Acar5010_203655	2	0.098954
An03g06730		Ortholog of A. nidulans FGSC A4 : AN10344, A. fumigatus Af293 : Afu8g02620, A. oryzae RIB40 : AO090010000752, Neosartorya fischeri NRRL 181 : NFIA_096330 and Aspergillus wentii : Aspwe1_0033226	3	0.0939964
An11g04180	bipA	DnaK-type molecular chaperone; ER chaperone; unfolded protein response (UPR) target gene; expression enhanced by maltose, by heat shock, DTT and by tunicamycin treatment	4	0.0929256
An18g03740	mkkA	MAP kinase kinase (MAPKK) with a predicted role in the cell wall integrity pathway; induced by caspofungin	3	0.091969
An12g09970		Protein of unknown function	2	0.0854357
An16g07920		Ortholog(s) have role in response to salt stress	1	0.0827234
An09g00650		Protein of unknown function; expression induced by tunicamycin and DTT	1	0.0643404
An06g01030		Protein of unknown function	2	0.0624141
An16g06750		Protein with similarity to D-stereospecific aminopeptidase; acid protease; expression induced by tunicamycin and DTT	2	0.0570611
An04g01290		Ortholog(s) have DNA end binding, double-stranded DNA binding, single-stranded DNA binding activity	2	0.0543817
An01g11100		Has domain(s) with predicted role in transmembrane transport and integral component of membrane localization	2	0.0540994
An12g01210		Ortholog(s) have dipeptide transmembrane transporter activity, peptide transmembrane transporter activity, tripeptide transmembrane transporter activity	2	0.0536354
An01g08850		Ortholog(s) have G-protein alpha-subunit binding, GDP-dissociation inhibitor activity, protein kinase C binding, ribosome binding activity	1	0.0493209
An08g05410		Ortholog of A. nidulans FGSC A4 : AN1027, A. fumigatus Af293 : Afu1g12660, A. oryzae RIB40 : AO090012000716, Aspergillus wentii : Aspwe1_0040406 and Aspergillus sydowii : Aspsy1_0038316	1	0.0484047
An08g03460		Ortholog(s) have role in endonucleolytic cleavage in 5'-ETS of tricistronic rRNA transcript (SSU-rRNA, 5.8S rRNA and LSU-rRNA), more	2	0.0478126
An08g07840	cprA	Putative cytochrome P450 reductase; NADPH-ferrihemoprotein reductase; induced by benzoic acid; longer cprA-beta transcript carries a small uORF	2	0.0449274
An07g05920	cypD	Estrogen receptor-binding cyclophilin	1	0.0418041
An01g09600		Ortholog of A. oryzae RIB40 : AO090011000137, Aspergillus niger ATCC 1015 : 35780-mRNA, Aspergillus terreus NIH2624 : ATET_06221 and Aspergillus tubingensis : Asptu1_0199108	1	0.0358595
An03g02430		Ortholog(s) have mannitol 2-dehydrogenase activity, mannitol dehydrogenase activity and extracellular region localization	1	0.0319729
An11g01410		Has domain(s) with predicted hydrolase activity, hydrolase activity, acting on carbon-nitrogen (but not peptide) bonds activity	1	0.0315216
An03g00230		Has domain(s) with predicted amino acid transmembrane transporter activity, role in amino acid transmembrane transport and membrane localization	1	0.0298943
An05g01290		Has domain(s) with predicted transmembrane transporter activity, role in transmembrane transport and integral component of membrane, membrane localization	1	0.0287932
An06g02270		Has domain(s) with predicted transmembrane transporter activity, role in transmembrane transport and integral component of membrane, membrane localization	1	0.0277211
An18g00740		Ortholog of A. nidulans FGSC A4 : AN5689, AN3244, AN1550, A. oryzae RIB40 : AO090038000176, Neosartorya fischeri NRRL 181 : NFIA_047350 and Aspergillus wentii : Aspwe1_0042514, Aspwe1_0046700, Aspwe1_0176395	1	0.0253399

## Sheet: ERV14
Gene_id	Gene_Symbol	Description	ERV14_MappedReads	ERV14_FPKM	Empty_MappedReads	Empty_FPKM	ERV14_VS_Empty_DEGS.table.logFC	ERV14_VS_Empty_DEGS.table.PValue	Number of predicted TMHs
An15g03940		Putative monosaccharide transporter; AmyR dependant induction on maltose	2195000	52209.7	912378	27016.6	1.86784	9.33926e-19	10
An18g01000		Protein of unknown function; expression repressed by tunicamycin and DTT	788688	34754.5	77412	4246.72	3.9501	6.71506e-66	1
An12g07530		Has domain(s) with predicted ferrous iron binding, oxidoreductase activity and role in cellular aromatic compound metabolic process	278658	24645.3	64852	7140.45	2.70457	2.61891e-35	#N/A
An07g05820		Ortholog of A. nidulans FGSC A4 : AN4578/usgS, A. fumigatus Af293 : Afu2g02010/usgS, A. oryzae RIB40 : AO090011000471, Aspergillus wentii : Aspwe1_0173282 and Aspergillus sydowii : Aspsy1_0059300	57178	1956.65	2021	86.0975	5.42097	6.72137e-88	4
An01g05230		Ortholog(s) have role in hyphal growth, response to cold, response to heat, response to oxidative stress, response to salt stress, sporocarp development involved in sexual reproduction	327865	22019.3	1755	146.732	8.14521	2.13036e-173	0
An14g01840		Ortholog of A. nidulans FGSC A4 : AN3215, AN7166, AN8609, A. fumigatus Af293 : Afu3g14210, Afu4g03360, Afu4g12510 and A. niger CBS 513.88 : An09g04200	2491	157.207	1302	102.294	1.53581	3.23531e-08	1
An03g06410	erg25	Putative C-4 methyl sterol oxidase; induced by fenpropimorph	959710	39910.2	1272	65.8522	10.1571	4.2551e-222	0
An11g01260		Has domain(s) with predicted metal ion transmembrane transporter activity, role in metal ion transport, transmembrane transport and membrane localization	665044	16941.6	1022	32.4111	9.93999	9.98044e-201	2
An08g08760		Ortholog(s) have guanyl-nucleotide exchange factor activity and role in mature ribosome assembly	1861	67.9421	885	40.2231	1.66964	2.98997e-06	0
An09g06760		Ortholog of A. nidulans FGSC A4 : AN8281, A. fumigatus Af293 : Afu5g04290, A. oryzae RIB40 : AO090102000635, Aspergillus wentii : Aspwe1_0043150 and Aspergillus sydowii : Aspsy1_0094483	3103	132.552	794	42.2244	2.56315	1.52167e-15	0
An12g06930	amyA	Alpha-amylase (1, 4-alpha-D-glucan 4-glucanohydrolase), hydrolyzes the alpha-1,4-glucosidic bonds in glycogen or starch; identical to An05g02100	5466	137.569	779	24.4077	3.40339	6.79697e-23	0
An16g03330		Ortholog(s) have fungal-type cell wall localization	2189	151.886	663	57.2698	2.32123	8.25119e-15	0
An02g01870		Ortholog(s) have role in lipid droplet disassembly	1458516	95902.2	631	51.6519	11.7713	8.24913e-266	4
An11g00040		Ortholog of A. nidulans FGSC A4 : AN3008, A. oryzae RIB40 : AO090011000565, Aspergillus niger ATCC 1015 : 46090-mRNA, 52849-mRNA and Aspergillus carbonarius ITEM 5010 : Acar5010_204950	94085	10274.8	556	75.5905	8.00096	3.98579e-160	1
An15g00990		Ortholog(s) have acireductone dioxygenase (Ni2+-requiring) activity and role in L-methionine salvage from methylthioadenosine	397965	27921.8	554	48.389	10.085	2.80898e-214	0
An15g02040		Ortholog of A. nidulans FGSC A4 : AN6657, A. fumigatus Af293 : Afu6g03400, Neosartorya fischeri NRRL 181 : NFIA_049930, Aspergillus wentii : Aspwe1_0168205 and Aspergillus versicolor : Aspve1_0086179	1741	232.606	507	84.3277	2.37893	4.5364e-18	1
An15g00070	mdhA	Malate dehydrogenase precursor	280937	10627.3	499	23.4992	9.72833	5.1166e-187	0
An18g04790		Ortholog(s) have disulfide oxidoreductase activity, glutathione disulfide oxidoreductase activity, glutathione peroxidase activity, glutathione transferase activity	2304	275.578	491	73.111	2.8289	3.27969e-24	0
An08g00610		Ortholog(s) have structural constituent of ribosome activity, role in cytoplasmic translation and cytosolic large ribosomal subunit localization	1964	127.801	483	39.1273	2.61999	4.58468e-16	0
An06g01610		Putative heat shock protein	2004	279.644	436	75.7416	2.79915	5.56835e-24	0
An12g08570	prxII	Type 2 peroxiredoxin	976	72.5294	406	37.5604	1.86218	1.90654e-07	0
An12g07550		Protein of unknown function	596	31.0585	312	20.2408	1.5275	0.0011366	1
An17g01460		Ortholog of Aspergillus acidus : Aspfo1_0084770	582	61.9429	271	35.9069	1.69951	4.45997e-06	0
An01g02880	cep52	Cytoplasmic ubiquitin / ribosomal fusion protein	1036	100.86	266	32.2391	2.55679	1.41171e-13	0
An05g01070		Ortholog(s) have role in regulation of phospholipid translocation and plasma membrane localization	6301	246.522	261	12.7123	5.17686	1.6864e-45	7
An13g02730		Ortholog of A. nidulans FGSC A4 : AN8483, Neosartorya fischeri NRRL 181 : NFIA_001870, Aspergillus wentii : Aspwe1_0175506 and Aspergillus versicolor : Aspve1_0088786	1026	159.079	233	44.974	2.73551	1.15545e-18	1
An02g12010	ipp1	Inorganic pyrophosphatase	1152	50.2355	232	12.5946	2.89715	4.95679e-10	0
An07g07780		Ortholog(s) have ATPase inhibitor activity, enzyme inhibitor activity, role in negative regulation of ATPase activity and mitochondrion localization	564	68.769	226	34.3053	1.91566	1.04084e-07	0
An07g05770		Protein of unknown function	981	120.787	144	22.0726	3.3599	1.01394e-20	0
An04g07160		Has domain(s) with predicted phosphoric diester hydrolase activity and role in lipid metabolic process	832	27.7899	141	5.86302	3.12703	5.49458e-07	0
An15g06150		Ortholog of A. nidulans FGSC A4 : AN2166, A. fumigatus Af293 : Afu2g15850, A. oryzae RIB40 : AO090012000227, Aspergillus wentii : Aspwe1_0108220 and Aspergillus sydowii : Aspsy1_0140323	527	20.6829	137	6.69362	2.51617	0.000165623	0
An17g01360		Ortholog(s) have structural constituent of ribosome activity, role in cytoplasmic translation and cytosolic large ribosomal subunit localization	551	27.137	134	8.2159	2.61732	8.72276e-06	0
An02g03950		Ortholog(s) have role in maintenance of translational fidelity, rRNA processing, ribosomal large subunit assembly and cell surface, cytosolic large ribosomal subunit, small-subunit processome localization	428	13.6774	130	5.17179	2.28464	0.00394482	0
An02g12640		Putative RNA-binding protein	529	12.303	116	3.35857	2.73202	0.00200946	0
An08g10030		Protein of unknown function; induced by growth on starch and lactate	247	27.2109	104	14.2633	1.8374	0.00041851	0
An13g00630		Protein of unknown function	31089	5827.51	99	23.1021	8.88594	2.77298e-161	0
An02g11150	aglB	Putative alpha-galactosidase variant B; expression is induced on xylan; XlnR regulated	411	11.6254	79	2.78185	2.90887	0.000794618	0
An09g06200		Ortholog of A. nidulans FGSC A4 : AN6413, AN6419, AN6946, AN5312, AN5664, AN8328, AN3241, AN10369, AN1930, AN2386, AN1738, AN11159, AN8984, AN8951, AN1540, AN8971, AN9387, AN9266, AN9306, AN1317, AN10886, AN7232, AN7774, AN12202	370	11.9455	67	2.69287	2.99202	0.000794618	6
An14g00960		Cysteine synthase	497	11.7547	65	1.91386	3.42841	0.000794618	0
An07g02180		E2 dihydrolipoamide acetyltransferase	586	10.8868	63	1.45708	3.67684	0.000187	0
An02g01830		Ortholog(s) have electron transfer activity and role in mitochondrial ATP synthesis coupled electron transport, mitochondrial electron transport, cytochrome c to oxygen, mitochondrial electron transport, ubiquinol to cytochrome c	374	41.5666	53	7.3331	3.3915	1.02759e-10	0
An18g06120		Putative secreted protein; expression induced by tunicamycin and DTT	726	18.7995	51	1.64406	4.30261	7.44748e-07	0
An18g06820	gfaA	Putative glutamine:fructose-6-phosphate amidotransferase; responsible for the first and a rate-limiting step in chitin synthesis; induced by caspofungin	413	7.46305	51	1.1473	3.44338	0.00464266	0
An14g01430		Ortholog of A. nidulans FGSC A4 : AN7139, A. fumigatus Af293 : Afu4g03730, A. oryzae RIB40 : AO090011000309, Aspergillus wentii : Aspwe1_0030342 and Aspergillus sydowii : Aspsy1_0034590	890	23.9858	49	1.644	4.65272	1.24618e-08	0
An08g03510		Protein of unknown function	779	28.3576	42	1.90336	4.70002	7.42892e-10	0
An08g03490	ef1	Elongation factor 1 beta	519	21.5117	37	1.90919	4.29874	7.04324e-08	0
An02g12140	gsdA	Glucose-6-phosphate dehydrogenase; expression induced by growth on xylose; induced by growth on starch and lactate	362	8.8969	17	0.520138	4.63343	0.00126829	0
An02g03110		Ortholog(s) have structural constituent of ribosome activity and mitochondrial large ribosomal subunit, mitochondrial ribosome localization	188	10.8805	17	1.22484	3.89916	0.000187	0
An08g03600		Ortholog(s) have extracellular region localization	150	11.0814	10	0.91969	4.28343	0.000187	0
An08g00560		Methylene-fatty-acylphospholipid synthase	278791	13064.6	8	0.466708	15.257	1.63344e-209	6
An02g03540		Ortholog(s) have fructose transmembrane transporter activity, glucose transmembrane transporter activity, mannose transmembrane transporter activity	534017	11954.8	7	0.195086	15.9425	1.10463e-205	12
An09g04010	chsB	Putative chitin synthase, class III; induced by caspofungin	434453	5963.11	6	0.102523	15.3699	8.46965e-176	7
An05g00750		Ortholog(s) have cytosolic large ribosomal subunit localization	942	110.565	6	0.876714	7.65044	9.54723e-30	0
An01g12240		Ortholog of A. nidulans FGSC A4 : AN2423, AN0736, A. fumigatus Af293 : Afu1g14230, Afu2g13800, A. niger CBS 513.88 : An02g05360 and A. oryzae RIB40 : AO090026000195	305	13.9798	5	0.285305	5.88753	2.86152e-05	0
An03g00640		Ortholog of A. fumigatus Af293 : Afu2g17790, Neosartorya fischeri NRRL 181 : NFIA_093190, Aspergillus niger ATCC 1015 : 194162-mRNA and Aspergillus zonatus : Aspzo1_0112721, Aspzo1_0127952, Aspzo1_0154500	587134	15048.5	4	0.12763	16.5752	1.30429e-215	11
An04g02250		Protein of unknown function; expression induced by tunicamycin and DTT	1160	158.351	4	0.679771	8.47115	3.03177e-38	1
An11g04810	aox1	Mitochondria-localized alternative oxidase; functions in a cyanide- and antimycin A-insensitive and salicylhydroxamic acid-sensitive respiratory pathway; constitutively expressed regardless of the glucose concentration	162	5.77994	4	0.177667	5.02151	0.0172979	2
An18g03740	mkkA	MAP kinase kinase (MAPKK) with a predicted role in the cell wall integrity pathway; induced by caspofungin	473098	11650.2	3	0.091969	16.3945	1.43479e-204	0
An03g06730		Ortholog of A. nidulans FGSC A4 : AN10344, A. fumigatus Af293 : Afu8g02620, A. oryzae RIB40 : AO090010000752, Neosartorya fischeri NRRL 181 : NFIA_096330 and Aspergillus wentii : Aspwe1_0033226	882	22.1983	3	0.0939964	7.35299	7.04324e-08	0
An14g02090		Ortholog of Aspergillus wentii : Aspwe1_0739269, Aspergillus versicolor : Aspve1_0088438, Aspergillus sydowii : Aspsy1_0071565 and Aspergillus brasiliensis : Aspbr1_0220682	7103	509.747	2	0.178683	11.4586	1.50154e-75	2
An02g07330		Ortholog of Aspergillus tubingensis : Asptu1_0028933, Aspergillus flavus NRRL 3357 : AFL2T_02306, Aspergillus kawachii : Aspka1_0179093 and Aspergillus carbonarius ITEM 5010 : Acar5010_203655	415	16.4935	2	0.098954	6.89886	8.35118e-06	0
An12g09970		Protein of unknown function	360	12.353	2	0.0854357	6.56065	9.96168e-05	0
An04g05220		Ubiquinol-cytochrome c reductase	82	6.12993	2	0.186128	5.06976	0.00894141	0
An10g00680		Has domain(s) with predicted proton transmembrane transporter activity and role in proton transmembrane transport	76	5.7847	2	0.189512	4.97343	0.0172979	4
An05g01290		Has domain(s) with predicted transmembrane transporter activity, role in transmembrane transport and integral component of membrane, membrane localization	504102	11659.2	1	0.0287932	16.8055	1.32375e-204	11
An06g02270		Has domain(s) with predicted transmembrane transporter activity, role in transmembrane transport and integral component of membrane, membrane localization	445865	9928.31	1	0.0277211	16.5817	1.10822e-197	12
An03g02430		Ortholog(s) have mannitol 2-dehydrogenase activity, mannitol dehydrogenase activity and extracellular region localization	318926	8190.91	1	0.0319729	16.2725	2.0822e-189	0
An16g07920		Ortholog(s) have role in response to salt stress	126615	8413.45	1	0.0827234	15.9781	1.46556e-190	0
An03g00230		Has domain(s) with predicted amino acid transmembrane transporter activity, role in amino acid transmembrane transport and membrane localization	151229	3631.48	1	0.0298943	15.1145	1.15943e-154	12
An09g00650		Protein of unknown function; expression induced by tunicamycin and DTT	228	11.7836	1	0.0643404	6.62083	9.96168e-05	0
An01g08850		Ortholog(s) have G-protein alpha-subunit binding, GDP-dissociation inhibitor activity, protein kinase C binding, ribosome binding activity	134	5.3088	1	0.0493209	5.58168	0.0172979	0
An16g05920		Similar to membrane protein Pth11 of Magnaporthe grisea; expression repressed by tunicamycin and DTT	1270346	39392.9	0	0			7
An02g08020		Putative H+-transporting ATPase lipid-binding protein	410793	31846.3	0	0			4
An02g09090		Mutarotase enzyme	759703	23616.4	0	0			0
An09g02840		Ortholog of A. nidulans FGSC A4 : AN1574, AN0682, A. fumigatus Af293 : Afu1g13430, Afu8g05950, A. oryzae RIB40 : AO090012000536 and Aspergillus wentii : Aspwe1_0494153, Aspwe1_0688999	425089	19555.5	0	0			3
An16g05910		Protein similar to putative cytochrome P450; expression repressed by tunicamycin and DTT	614210	15427.6	0	0			1
An14g00950		Ortholog(s) have ferric-chelate reductase activity, role in copper ion import, iron ion transport and plasma membrane localization	530774	13887.3	0	0			4
An01g10730		Ortholog(s) have role in regulation of ergosterol biosynthetic process and endoplasmic reticulum localization	232153	13624.2	0	0			0
An05g01760		Has domain(s) with predicted transferase activity, transferring acyl groups other than amino-acyl groups activity	543791	13604.4	0	0			7
An08g03680		Ortholog(s) have extracellular region localization	445751	9440.36	0	0			2
An06g01550	fksA	Beta-1,3-glucan synthase	1315164	8702.31	0	0			16
An16g02000		Protein involved in shikimate metabolism	294905	7136.18	0	0			12
An12g10590		Protein of unknown function; expression repressed by tunicamycin and DTT	254878	6532.62	0	0			0
An04g10010		Protein of unknown function	169713	6232.18	0	0			6
An12g04450		Ortholog of A. nidulans FGSC A4 : AN6116, A. fumigatus Af293 : Afu2g08820, A. oryzae RIB40 : AO090011000818, Aspergillus wentii : Aspwe1_0044988 and Aspergillus sydowii : Aspsy1_0045203	150688	5666.08	0	0			0
An04g09120		Ortholog(s) have NEDD8 transferase activity, cullin family protein binding, protein binding, bridging, ubiquitin conjugating enzyme binding, ubiquitin-like protein binding activity	116197	5384.89	0	0			0
An07g07670		Ortholog of A. nidulans FGSC A4 : AN4508/bxiA, A. fumigatus Af293 : Afu2g03220, A. oryzae RIB40 : AO090120000264, Aspergillus wentii : Aspwe1_0172263 and Aspergillus sydowii : Aspsy1_0213187	137017	5152.04	0	0			6
An08g06500		Ortholog(s) have peptidyl-prolyl cis-trans isomerase activity, protein phosphatase regulator activity, role in mitotic spindle organization, response to osmotic stress and protein phosphatase type 2A complex localization	152865	4570.98	0	0			0
An19g00340		Has domain(s) with predicted calcium:proton antiporter activity, cation transmembrane transporter activity, role in calcium ion transport, cation transport, transmembrane transport and integral component of membrane localization	123250	3968.93	0	0			10
An16g09210		Ortholog(s) have role in iron-sulfur cluster assembly and CIA complex localization	47369	2974.51	0	0			0
An16g09200		Ortholog(s) have role in regulation of heterochromatin domain assembly and Prp19 complex, U5 snRNP, post-mRNA release spliceosomal complex, spliceosomal complex localization	221000	2803.55	0	0			0
An12g02080		Ortholog(s) have versicolorin reductase activity and role in positive regulation of sterigmatocystin biosynthetic process, sterigmatocystin biosynthetic process	50442	2503.93	0	0			#N/A
An12g03760		Ortholog of A. niger CBS 513.88 : An12g03780, An12g03770, Aspergillus wentii : Aspwe1_0168652 and Aspergillus niger ATCC 1015 : 54032-mRNA, 54033-mRNA, 54034-mRNA	74167	2311.3	0	0			2
An09g02710		Has domain(s) with predicted cofactor binding, dihydrolipoyllysine-residue (2-methylpropanoyl)transferase activity, transferase activity, transferring acyl groups activity and role in fatty-acyl-CoA biosynthetic process, metabolic process	84531	2244.43	0	0			0
An07g07270		Ortholog(s) have tRNA 2'-phosphotransferase activity, role in tRNA splicing, via endonucleolytic cleavage and ligation and cytoplasm, nucleus localization	56278	2208.71	0	0			0
An02g08330		Protein of unknown function; expression repressed by tunicamycin and DTT	88348	2085.62	0	0			13
An07g02820		Ortholog(s) have role in endoplasmic reticulum tubular network membrane organization, nuclear envelope organization, nuclear pore distribution, nuclear pore organization, spindle pole body localization to nuclear envelope	44031	1920.07	0	0			3
An16g09020		Ortholog(s) have N-acetylglucosamine transmembrane transporter activity, role in N-acetylglucosamine transport and plasma membrane localization	76518	1887.98	0	0			12
An14g00970		Has domain(s) with predicted role in transmembrane transport and integral component of membrane localization	85126	1849.63	0	0			13
An17g00910		Gamma-aminobutyrate transaminase	68364	1720.59	0	0			0
An12g00170		Has domain(s) with predicted oxidoreductase activity, transferase activity, transferring acyl groups other than amino-acyl groups, zinc ion binding activity and role in oxidation-reduction process	45579	1649.63	0	0			0
An17g01000		Ortholog(s) have anion channel activity, anion transmembrane transporter activity, role in anion transport and plasma membrane localization	46662	1328.85	0	0			4
An03g05590		Has domain(s) with predicted nucleobase transmembrane transporter activity, role in nucleobase transport, transmembrane transport and membrane localization	65219	1316.84	0	0			12
An17g01280		Ortholog(s) have MAP kinase kinase kinase activity, SAM domain binding activity	85559	1188.63	0	0			0
An15g05850		Has domain(s) with predicted integral component of membrane localization	31720	1076.67	0	0			4
An11g06150		Ortholog(s) have L-proline transmembrane transporter activity, role in proline transport and fungal-type vacuole, plasma membrane localization	41789	945.627	0	0			12
An08g01180		Has domain(s) with predicted phosphoric diester hydrolase activity and role in lipid metabolic process	32665	889.882	0	0			0
An01g06610		Ortholog of Aspergillus tubingensis : Asptu1_0039844, Aspergillus brasiliensis : Aspbr1_0118922, Aspergillus kawachii : Aspka1_0173805 and Aspergillus acidus : Aspfo1_0039768	47017	835.192	0	0			8
An12g04460		Protein of unknown function	7157	579.896	0	0			0
An14g03020		Ortholog(s) have phospholipid scramblase activity, voltage-gated calcium channel activity, role in ion transmembrane transport, phospholipid translocation and integral component of membrane localization	28549	485.831	0	0			5
An17g01080		Ortholog of A. nidulans FGSC A4 : AN2257, A. fumigatus Af293 : Afu3g14870, Afu5g06570, Neosartorya fischeri NRRL 181 : NFIA_036550, NFIA_062380 and Aspergillus wentii : Aspwe1_0045706, Aspwe1_0047992	22882	477.363	0	0			11
An07g01970		Ortholog(s) have metalloendopeptidase activity, metallopeptidase activity, role in proteolysis and Golgi apparatus, cytoplasm, fungal-type vacuole, intracellular, mitochondrial intermembrane space localization	24461	428.456	0	0			0
An01g04910		Ortholog of A. fumigatus Af293 : Afu1g03120, A. oryzae RIB40 : AO090005000771, Aspergillus wentii : Aspwe1_0169581 and Aspergillus terreus NIH2624 : ATET_02526	3	0.0706879	0	0			0
An01g09480		Ortholog(s) have CDP-diacylglycerol-serine O-phosphatidyltransferase activity	3548	243.491	0	0			4
An08g02240		Has domain(s) with predicted integral component of membrane localization	4724	232.659	0	0			3
An04g01260		Ortholog of A. nidulans FGSC A4 : AN4395, A. fumigatus Af293 : Afu4g06870, A. oryzae RIB40 : AO090023000901, Aspergillus wentii : Aspwe1_0023285 and Aspergillus sydowii : Aspsy1_0545881	7271	221.64	0	0			0
An03g05740		Ortholog of A. nidulans FGSC A4 : AN8444/celA, A. fumigatus Af293 : Afu3g03620, Afu8g00680, A. oryzae RIB40 : AO090138000033, AO090701000186 and Neosartorya fischeri NRRL 181 : NFIA_005820, NFIA_094120	10100	206.252	0	0			5
An01g05960		Ortholog(s) have carbohydrate binding activity	1424	159.677	0	0			0
An04g03870		Has domain(s) with predicted catalytic activity and membrane localization	5253	149.257	0	0			0
An01g05680		Ortholog(s) have Ddb1-Wdr21 complex localization	1	0.0264955	0	0			0
An01g05690		Ortholog(s) have DNA replication origin binding activity, role in mitotic DNA replication initiation, mitotic sister chromatid cohesion and nuclear chromatin, nuclear origin of replication recognition complex localization	3	0.0692585	0	0			0
An06g00300	ugtB	Putative UDP-galactofuranose transporter involved in import of UDP-galactofuranose into the Golgi lumen	3368	126.642	0	0			9
An11g06450		Ortholog of A. nidulans FGSC A4 : AN1088, A. fumigatus Af293 : Afu4g14470/tpcK, Afu8g00430, A. niger CBS 513.88 : An07g00070, An07g00010, An02g08300 and A. oryzae RIB40 : AO090001000323	1409	107.245	0	0			0
An17g00370		Ortholog(s) have single-stranded telomeric DNA binding activity	3046	105.384	0	0			0
An01g06150		3-deoxy-7-phosphoheptulonate synthase	2	0.0662738	0	0			0
An15g07230		Has domain(s) with predicted role in cell redox homeostasis	923	62.9992	0	0			0
An11g10200		Protein with similarity to subunit VIa of cytochrome c oxidase	696	61.5562	0	0			0
An09g00630	cipC	Ortholog of A. nidulans FGSC A4 : AN7937/cipC, A. oryzae RIB40 : AO090113000132, Neosartorya fischeri NRRL 181 : NFIA_028040 and Aspergillus wentii : Aspwe1_0033535, Aspwe1_0132880	413	45.901	0	0			0
An01g09980	aspHS	Hemolysin	525	45.1604	0	0			0
An14g00850	fpr1	Peptidyl-prolyl isomerase	411	44.8843	0	0			0
An14g05320	wos2	Putative cell cycle regulator p21 protein	700	44.177	0	0			0
An04g01200		Ortholog(s) have ubiquinol-cytochrome-c reductase activity and role in aerobic respiration, mitochondrial electron transport, ubiquinol to cytochrome c, mitochondrial respiratory chain complex III assembly	427	43.5987	0	0			0
An01g03580		Ortholog(s) have cell surface, cytosolic large ribosomal subunit localization	675	42.5992	0	0			0
An07g02960		Ortholog(s) have small ribosomal subunit rRNA binding, structural constituent of ribosome activity and role in maturation of SSU-rRNA from tricistronic rRNA transcript (SSU-rRNA, 5.8S rRNA, LSU-rRNA)	507	41.8905	0	0			0
An02g01240		Has domain(s) with predicted protein heterodimerization activity, sequence-specific DNA binding activity and intracellular localization	915	38.8222	0	0			0
An16g07290		F1F0-ATPase complex subunit	754	38.6506	0	0			0
An10g00500		Ortholog(s) have protein carrier activity, protein transporter activity, unfolded protein binding activity	264	37.2533	0	0			0
An06g01890		Putative HIT family protein; repressed by growth on starch and lactate	403	37.2149	0	0			0
An02g12270	grrbp2	Glycine-rich RNA-binding protein	332	35.6372	0	0			0
An02g07920		Ortholog of Aspergillus tubingensis : Asptu1_0028992, Aspergillus brasiliensis : Aspbr1_0038395, Neosartorya fischeri NRRL 181 : NFIA_047710 and Aspergillus acidus : Aspfo1_0030390, Aspfo1_0030393	487	35.3536	0	0			1
An01g10720		Ortholog(s) have structural constituent of ribosome activity and cytosolic small ribosomal subunit localization	230	32.0949	0	0			0
An02g06130		Ortholog(s) have mRNA binding, small ribosomal subunit rRNA binding activity and role in maturation of SSU-rRNA from tricistronic rRNA transcript (SSU-rRNA, 5.8S rRNA, LSU-rRNA), ribosomal small subunit assembly	345	28.6941	0	0			0
An01g09610		Ortholog(s) have glutathione binding activity and extracellular region, intracellular localization	495	28.2575	0	0			0
An13g01800		Ortholog of A. fumigatus Af293 : Afu5g00590, A. niger CBS 513.88 : An15g07140 and Aspergillus wentii : Aspwe1_0039567, Aspwe1_0040764, Aspwe1_0044902	765	28.0103	0	0			0
An14g03080		Ortholog of A. nidulans FGSC A4 : AN2488, A. fumigatus Af293 : Afu3g00500, Afu4g03010, A. oryzae RIB40 : AO090012000174 and Aspergillus wentii : Aspwe1_0176515, Aspwe1_0622364	363	26.9756	0	0			4
An02g14080		Putative asparaginyl-tRNA synthetase	1229	26.8432	0	0			0
An07g07430		Ortholog(s) have role in ribosome biogenesis and cytosolic large ribosomal subunit, preribosome, large subunit precursor localization	244	25.9692	0	0			0
An12g07790		Ortholog(s) have polysomal ribosome localization	319	25.6813	0	0			0
An01g11630	sec61a	Putative SEC61 complex subunit; expression enhanced by maltose; expression induced by tunicamycin and DTT	144	25.4715	0	0			1
An15g07620		Ortholog of Aspergillus tubingensis : Asptu1_0132098, Aspergillus brasiliensis : Aspbr1_0034734, Aspergillus kawachii : Aspka1_0182387 and Aspergillus acidus : Aspfo1_0135600	271	25.0254	0	0			0
An11g01660		Ortholog of A. nidulans FGSC A4 : AN3925, A. fumigatus Af293 : Afu6g08390, A. oryzae RIB40 : AO090001000495, Aspergillus wentii : Aspwe1_0120489 and Aspergillus sydowii : Aspsy1_0150601	549	24.2776	0	0			0
An08g03910		Ortholog(s) have role in ribosomal large subunit export from nucleus and cytosolic large ribosomal subunit localization	420	24.196	0	0			0
An07g10060		Putative proteinase B inhibitor	154	21.2535	0	0			0
An14g01685		Ortholog of A. nidulans FGSC A4 : AN11171, AN7148, A. fumigatus Af293 : Afu4g03595, A. niger CBS 513.88 : An02g01320, An03g06340 and A. oryzae RIB40 : AO090026000213, AO090026000142, AO090023000130	263	21.173	0	0			0
An04g01870		Ortholog(s) have endopeptidase activator activity and role in proteasomal ubiquitin-independent protein catabolic process, proteasome-mediated ubiquitin-dependent protein catabolic process	326	20.0696	0	0			#N/A
An06g01660		Ortholog(s) have unfolded protein binding activity and mitochondrion localization	272	18.6667	0	0			0
An08g10110		Putative lipid transfer protein; induced by caspofungin	189	18.2587	0	0			0
An18g06440		Ortholog(s) have role in endoplasmic reticulum to Golgi vesicle-mediated transport and COPII-coated ER to Golgi transport vesicle, Golgi apparatus, endoplasmic reticulum localization	250	18.0444	0	0			3
An02g11190		Ortholog of A. nidulans FGSC A4 : AN8050, A. fumigatus Af293 : Afu5g02090, A. oryzae RIB40 : AO090003001312, Neosartorya fischeri NRRL 181 : NFIA_040030 and Aspergillus wentii : Aspwe1_0061053	208	18.0155	0	0			0
An08g03690		Putative ADP-ribosylation factor; expression enhanced by maltose	257	17.5415	0	0			0
An11g11290		Ortholog of A. nidulans FGSC A4 : AN3467, Aspergillus wentii : Aspwe1_0029470, Aspergillus versicolor : Aspve1_0040518 and Aspergillus clavatus NRRL 1 : ACLA_033380	139	17.4568	0	0			0
An08g08890		Ortholog of A. fumigatus Af293 : Afu8g01260, Neosartorya fischeri NRRL 181 : NFIA_094710, Aspergillus versicolor : Aspve1_0142475 and Aspergillus clavatus NRRL 1 : ACLA_012120	652	17.2387	0	0			1
An12g04870		Ortholog(s) have role in ribosomal large subunit assembly, translational termination and cell surface, cytosolic large ribosomal subunit localization	304	17.0442	0	0			0
An18g02720		Ortholog(s) have glutathione peroxidase activity, glutathione transferase activity and intracellular localization	300	16.4527	0	0			0
An01g00780	xynB	Secreted endo-1,4-xylanase; glycoside hydrolase family 11; highly expressed on xylose; expression repressed by tunicamycin and DTT; XlnR regulated	293	16.2821	0	0			0
An17g00560		Ortholog(s) have phosphatidylinositol-3-phosphate binding, protein carrier activity and role in ascospore-type prospore membrane assembly, intracellular protein transport, retrograde transport, endosome to Golgi, vesicle-mediated transport	757	16.141	0	0			0
An07g08300	cypA	Peptidyl-proline cis-trans isomerase; cyclophilin; putative cellular target for cyclosporin A	282	16.0982	0	0			0
An02g07210	pepE	Putative acid aspartic protease, constitutively expressed	507	15.9583	0	0			0
An15g05920		Ortholog(s) have TBP-class protein binding activity, role in RNA polymerase II preinitiation complex assembly, transcription initiation from RNA polymerase II promoter and transcription factor TFIIA complex localization	141	15.8107	0	0			0
An10g00320		Has domain(s) with predicted N-acetyltransferase activity	310	15.7622	0	0			0
An13g01070		40S ribosomal protein S28.e	84	15.2891	0	0			0
An09g04240		Ortholog of A. fumigatus Af293 : Afu3g14260, A. oryzae RIB40 : AO090012000670, Neosartorya fischeri NRRL 181 : NFIA_063040 and Aspergillus wentii : Aspwe1_0038047	224	14.8063	0	0			0
An18g06160		Has domain(s) with predicted transcription coregulator activity, role in regulation of transcription by RNA polymerase II and mediator complex localization	317	14.6366	0	0			0
An11g09500		Ortholog(s) have structural constituent of ribosome activity and cytosolic small ribosomal subunit, extracellular region localization	296	14.353	0	0			0
An04g07010	caM	Calmodulin	171	14.3171	0	0			0
An03g04560	morA	Morphine dehydrogenase	315	13.9297	0	0			0
An01g12290		Ortholog(s) have role in Golgi vesicle transport and Golgi membrane localization	3	0.0495745	0	0			1
An15g02650		Protein of unknown function; expression induced by tunicamycin and DTT	161	13.5703	0	0			0
An04g01270		Protein of unknown function	231	13.3078	0	0			0
An12g10810		Ortholog(s) have extracellular region localization	162	13.2976	0	0			0
An11g10490		Ortholog(s) have proteasome binding, protein binding, bridging, ubiquitin binding, ubiquitin conjugating enzyme activity, ubiquitin-protein transferase activity	152	12.9861	0	0			0
An16g04430		Ortholog(s) have enzyme activator activity, heme binding activity, role in ergosterol biosynthetic process, regulation of ergosterol biosynthetic process and endoplasmic reticulum, endosome localization	173	12.7805	0	0			1
An08g03420		Has domain(s) with predicted cytoplasm, nucleus localization	392	12.6233	0	0			0
An08g09420		Ortholog(s) have extracellular region localization	191	12.4287	0	0			0
An02g02190		Ortholog(s) have role in chronological cell aging, hyphal growth, mitochondrial fission, peroxisome fission, peroxisome organization and mitochondrial outer membrane, peroxisome localization	150	12.2327	0	0			1
An02g10980		Ortholog(s) have intracellular localization	281	12.1691	0	0			0
An03g00330		Protein of unknown function	184	12.0986	0	0			0
An08g02800		Ortholog(s) have role in mRNA cis splicing, via spliceosome and Prp19 complex, post-mRNA release spliceosomal complex, spliceosomal complex localization	306	12.085	0	0			0
An02g08300		Protein of unknown function; induced by growth on starch and lactate; expression repressed by tunicamycin and DTT	189	12.0489	0	0			0
An11g10430		Ortholog(s) have condensed nuclear chromosome, nucleus localization	171	11.9976	0	0			0
An15g02780		Protein of unknown function	219	11.9582	0	0			0
An01g09220	melC2	Putative monophenol monooxigenase; tyrosinase; expression repressed by tunicamycin and DTT	384	11.8492	0	0			0
An05g02080		Ortholog of Aspergillus tubingensis : Asptu1_0159144, Aspergillus brasiliensis : Aspbr1_0189004, Aspergillus kawachii : Aspka1_0179273 and Aspergillus acidus : Aspfo1_0053091	317	11.8487	0	0			5
An18g06430		Ortholog of A. nidulans FGSC A4 : AN10705, A. fumigatus Af293 : Afu6g06630, A. oryzae RIB40 : AO090003000039, Neosartorya fischeri NRRL 181 : NFIA_052280 and Aspergillus wentii : Aspwe1_0170257	293	11.7941	0	0			0
An14g07060		Ortholog(s) have extracellular region, intracellular localization	204	11.7523	0	0			0
An02g12120		Ortholog(s) have structural constituent of ribosome activity, role in cytoplasmic translation and cytosolic large ribosomal subunit localization	102	11.6455	0	0			0
An08g10480		Ortholog(s) have role in maturation of LSU-rRNA and cytosolic large ribosomal subunit localization	243	11.5599	0	0			0
An15g00870		Ortholog(s) have calcium ion binding, calcium-dependent protein serine/threonine phosphatase activity, calcium-dependent protein serine/threonine phosphatase regulator activity	178	11.5231	0	0			0
An14g00140		Ortholog of A. nidulans FGSC A4 : AN6983, A. oryzae RIB40 : AO090206000017, Aspergillus versicolor : Aspve1_0033136, Aspergillus niger ATCC 1015 : 41464-mRNA and Aspergillus terreus NIH2624 : ATET_02762	507	11.3906	0	0			0
An18g06680		Ortholog(s) have role in proteasomal ubiquitin-independent protein catabolic process, proteasome assembly, proteasome-mediated ubiquitin-dependent protein catabolic process	234	11.2597	0	0			0
An12g10830		Protein of unknown function	257	11.2071	0	0			0
An02g12390	mbfA	Ortholog(s) have transcription coactivator activity and role in pathogenesis, positive regulation of transcription by RNA polymerase II	137	11.1004	0	0			0
An12g10710		Ortholog of A. nidulans FGSC A4 : AN8638/cetJ, A. fumigatus Af293 : Afu2g14320, Afu3g13130, Afu4g00730, Afu8g01530, A. niger CBS 513.88 : An01g01230 and A. oryzae RIB40 : AO090113000154	189	10.7404	0	0			0
An07g06570		Ortholog(s) have structural constituent of ribosome activity	94	10.3556	0	0			0
An04g02210		Ortholog(s) have CAAX-protein geranylgeranyltransferase activity, protein farnesyltransferase activity, protein geranylgeranyltransferase activity and role in peptide pheromone maturation, protein farnesylation, protein geranylgeranylation	272	9.95923	0	0			0
An18g05810		Protein with similarity to cytoplasmic ribosomal protein of the small subunit S26	95	9.94245	0	0			0
An01g02900		Ortholog(s) have RNA binding, ribosome binding, translation elongation factor activity, translation initiation factor activity	126	9.82869	0	0			0
An15g07510		Ortholog(s) have dipeptide transmembrane transporter activity, tripeptide transmembrane transporter activity and role in dipeptide transport, tripeptide transport	491	9.77244	0	0			11
An14g04920	tpiA	Triose-phosphate-isomerase	194	9.74569	0	0			0
An08g11120		Ortholog of A. niger CBS 513.88 : An02g10030, An06g00920, A. oryzae RIB40 : AO090701000867, Aspergillus niger ATCC 1015 : 37733-mRNA, 52530-mRNA and Aspergillus zonatus : Aspzo1_0076808	190	9.73954	0	0			0
An02g11860		Ortholog of A. nidulans FGSC A4 : AN5437, AN2941, A. fumigatus Af293 : Afu3g08250, Afu6g13630, A. oryzae RIB40 : AO090005001453, AO090103000325 and Aspergillus wentii : Aspwe1_0144636, Aspwe1_0552642	319	9.70044	0	0			0
An12g09780		Protein of unknown function	264	9.50013	0	0			0
An16g00920	pmp20	Putative peroxiredoxin; peroxisomal membrane protein; expression regulated by growth on starch and lactate	125	9.40036	0	0			0
An01g02300		Ortholog(s) have Arp2/3 complex binding activity, role in actin cortical patch assembly, actin filament debranching, negative regulation of Arp2/3 complex-mediated actin nucleation and actin cortical patch, cytoplasm localization	106	9.37494	0	0			0
An08g01490		Ortholog of S. cerevisiae : YCR051W, A. nidulans FGSC A4 : AN1295, A. fumigatus Af293 : Afu1g09700, Aspergillus wentii : Aspwe1_0168621 and Aspergillus sydowii : Aspsy1_0053072	207	9.2846	0	0			0
An11g09670		Ortholog(s) have structural constituent of ribosome activity	61	9.23002	0	0			0
An18g00980		Similar to membrane protein Pth11 of Magnaporthe grisea; expression repressed by tunicamycin and DTT	220	9.11866	0	0			7
An02g03130		Ortholog of A. fumigatus Af293 : Afu2g11162, Neosartorya fischeri NRRL 181 : NFIA_086450, Aspergillus wentii : Aspwe1_0175462 and Aspergillus versicolor : Aspve1_0027796	128	8.98065	0	0			0
An08g04840		Ortholog of Aspergillus tubingensis : Asptu1_0036554, Aspergillus kawachii : Aspka1_0183194 and Aspergillus niger ATCC 1015 : 177034-mRNA	158	8.97875	0	0			0
An08g06550		Putative subunit VIII of ubiquinol-cytochrome c reductase	69	8.93364	0	0			0
An03g04910		Ortholog(s) have role in Golgi to vacuole transport, endosomal transport, vesicle-mediated transport and AP-1 adaptor complex, Golgi apparatus, endosome localization	111	8.87921	0	0			0
An12g07900		Ortholog(s) have RNA strand annealing activity, double-stranded RNA binding, ribosomal small subunit binding, translation initiation factor activity, translation initiation factor binding activity	105	8.79121	0	0			0
An02g06230		Ortholog(s) have RNA polymerase II general transcription initiation factor activity and role in RNA polymerase II preinitiation complex assembly, transcription initiation from RNA polymerase II promoter	245	8.74126	0	0			0
An04g01650		Ortholog(s) have structural constituent of ribosome activity and mitochondrial ribosome, mitochondrial small ribosomal subunit localization	182	8.69093	0	0			0
An01g13590		Saccharopine dehydrogenase (NADP+, L-glutamate forming)	318	8.62575	0	0			0
An12g08590		Ortholog(s) have glyoxysome, mitochondrial membrane localization	144	8.45083	0	0			0
An02g07400		Ortholog(s) have DNA binding, DNA binding, bending activity	69	8.33233	0	0			0
An12g01270		Has domain(s) with predicted ATP binding, alanine-tRNA ligase activity, nucleic acid binding, nucleotide binding activity, role in alanyl-tRNA aminoacylation and cytoplasm localization	196	8.28801	0	0			0
An07g09970		Ortholog of A. nidulans FGSC A4 : AN5128, A. fumigatus Af293 : Afu1g07430, A. oryzae RIB40 : AO090012000994, Neosartorya fischeri NRRL 181 : NFIA_017320 and Aspergillus wentii : Aspwe1_0069020	81	8.27048	0	0			0
An04g00410		Putative dipeptidyl peptidase III	458	8.12425	0	0			0
An11g09390		NADH-ubiquinone oxidoreductase; respiratory-chain NADH dehydrogenase	142	8.10619	0	0			0
An07g09005		Ortholog of S. cerevisiae : YIL156W-B, A. nidulans FGSC A4 : AN10651, Aspergillus wentii : Aspwe1_0051611, Aspergillus versicolor : Aspve1_0055935 and Aspergillus niger ATCC 1015 : 209366-mRNA	48	7.93192	0	0			0
An16g04400		Ortholog(s) have Ran GTPase binding activity, role in nucleocytoplasmic transport, protein import into nucleus and nuclear envelope localization	75	7.65785	0	0			0
An18g06540		Has domain(s) with predicted DNA-binding transcription factor activity, RNA polymerase II-specific, zinc ion binding activity, role in regulation of transcription, DNA-templated and nucleus localization	382	7.6515	0	0			#N/A
An15g01690		Ortholog(s) have RNA binding activity, role in macroautophagy and cell surface, cytosolic large ribosomal subunit, hyphal cell wall localization	91	7.61905	0	0			0
An04g02260		Ortholog(s) have cytosolic large ribosomal subunit, hyphal cell wall, yeast-form cell wall localization	49	7.59735	0	0			0
An07g06820		Has domain(s) with predicted oxidoreductase activity and role in metabolic process	169	7.58018	0	0			0
An07g03030		Ortholog of A. nidulans FGSC A4 : AN8781, Neosartorya fischeri NRRL 181 : NFIA_026420, Aspergillus wentii : Aspwe1_0285981 and Aspergillus versicolor : Aspve1_0141259	73	7.57684	0	0			0
An11g06690		Ortholog of A. nidulans FGSC A4 : AN1754, AN8607, A. fumigatus Af293 : Afu3g02050, A. niger CBS 513.88 : An18g01930 and A. oryzae RIB40 : AO090001000144	90	7.53533	0	0			0
An13g02980		Ortholog of Neosartorya fischeri NRRL 181 : NFIA_002710, Aspergillus versicolor : Aspve1_0079646, Aspve1_0495831, Aspergillus niger ATCC 1015 : 191998-mRNA and Aspergillus zonatus : Aspzo1_0016273	107	7.42431	0	0			0
An01g13530		Ortholog(s) have GPI-anchor transamidase activity, role in attachment of GPI anchor to protein and GPI-anchor transamidase complex, endoplasmic reticulum membrane localization	237	7.38574	0	0			0
An15g06110		Ortholog(s) have role in Golgi to vacuole transport, vacuole fusion and Golgi trans cisterna, late endosome localization	151	7.26586	0	0			1
An02g12080		Ortholog of A. nidulans FGSC A4 : AN2978, A. fumigatus Af293 : Afu3g08440, Aspergillus wentii : Aspwe1_0552062, Aspergillus sydowii : Aspsy1_0087327 and Aspergillus terreus NIH2624 : ATET_01626	76	7.23087	0	0			0
An12g07750		Ortholog(s) have fungal-type cell wall localization	133	7.23087	0	0			0
An02g05120		Ortholog of A. nidulans FGSC A4 : AN6380, A. fumigatus Af293 : Afu2g13930, A. oryzae RIB40 : AO090026000179, Neosartorya fischeri NRRL 181 : NFIA_089090 and Aspergillus versicolor : Aspve1_0052622	1	0.0644045	0	0			0
An17g01110		Ortholog(s) have plasma membrane localization	81	7.21467	0	0			0
An03g00790		Has domain(s) with predicted RNA binding, ribonuclease III activity and role in RNA processing	89	7.21123	0	0			0
An15g01920	mcsA	2-methylcitrate synthase, component of the methyl citric acid cycle	266	7.1688	0	0			0
An08g00330		Has domain(s) with predicted structural constituent of ribosome activity, role in translation and large ribosomal subunit localization	75	7.08207	0	0			0
An09g03010		Has domain(s) with predicted role in cell wall macromolecule catabolic process	87	7.04918	0	0			0
An02g08110		Ortholog(s) have glutathione peroxidase activity, phospholipid-hydroperoxide glutathione peroxidase activity, thioredoxin peroxidase activity	153	7.0128	0	0			0
An07g00680		Threonine aldolase	196	6.99301	0	0			0
An08g10060		Ortholog(s) have GTP binding, GTPase activity, Ran guanyl-nucleotide exchange factor activity	118	6.89278	0	0			0
An15g06580		Uracil phosphoribosyltransferase	122	6.7201	0	0			0
An16g00300		Has domain(s) with predicted methyltransferase activity and role in metabolic process	163	6.71179	0	0			1
An18g04850		Ortholog(s) have RNA polymerase III activity, role in tRNA 3'-trailer cleavage, tRNA transcription by RNA polymerase III, termination of RNA polymerase III transcription and RNA polymerase III complex localization	63	6.70516	0	0			0
An11g09970		Ortholog(s) have role in aerobic respiration, development of symbiont in host and mitochondrial intermembrane space localization	97	6.69347	0	0			0
An07g08850		Ortholog(s) have structural constituent of ribosome activity and role in maturation of SSU-rRNA from tricistronic rRNA transcript (SSU-rRNA, 5.8S rRNA, LSU-rRNA), ribosomal small subunit assembly	84	6.55246	0	0			0
An02g11660		Has domain(s) with predicted catalytic activity and role in metabolic process	126	6.53892	0	0			0
An11g00550		Ortholog(s) have chaperone binding, unfolded protein binding activity and role in chaperone-mediated protein complex assembly, protein folding, protein import into mitochondrial intermembrane space, protein refolding	54	6.52096	0	0			0
An02g14500		Putative GPI-anchored cell wall protein; expression induced by tunicamycin and DTT; induced by caspofungin	109	6.48776	0	0			0
An13g03080		Ortholog of A. nidulans FGSC A4 : AN8503, Aspergillus wentii : Aspwe1_0177501, Aspergillus versicolor : Aspve1_0046851 and Aspergillus sydowii : Aspsy1_0159981	55	6.39573	0	0			0
An16g02130		Ortholog(s) have role in NADH oxidation, programmed cell death and mitochondrial respiratory chain complex I, membrane segment, mitochondrion localization	61	6.3841	0	0			0
An04g02610		Succinate-semialdehyde dehydrogenase (NAD(P)+)	252	6.36788	0	0			0
An01g08440		Ortholog of A. nidulans FGSC A4 : AN3590, AN7906, A. fumigatus Af293 : Afu4g12880, A. oryzae RIB40 : AO090009000315 and Aspergillus wentii : Aspwe1_0033843	96	6.2469	0	0			0
An05g00540		Ortholog(s) have cell surface, cytosolic large ribosomal subunit localization	95	6.24656	0	0			0
An04g00080		Ortholog of S. cerevisiae : EFM6, A. nidulans FGSC A4 : AN10539, A. fumigatus Af293 : Afu4g05890, A. oryzae RIB40 : AO090672000009 and Aspergillus wentii : Aspwe1_0167304	116	6.17301	0	0			0
An02g06820	pdcA	Pyruvate decarboxylase; protein levels influenced by presence of starch	280	6.16927	0	0			#N/A
An07g02010	pre8	20S CP alpha subunit of the proteasome	135	6.05517	0	0			0
An11g09380		Ortholog(s) have deoxyhypusine monooxygenase activity	163	6.03863	0	0			0
An02g04510		Ortholog(s) have protein kinase activator activity and role in cellular calcium ion homeostasis, cellular protein localization, conidium formation, positive regulation of septation initiation signaling, septin ring assembly	105	6.02138	0	0			0
An17g02200		Prephenate dehydratase	150	5.98042	0	0			0
An12g08610	glkA	Putative glucokinase	236	5.9756	0	0			0
An04g01800		Ortholog(s) have endopeptidase activator activity and role in proteasomal ubiquitin-independent protein catabolic process, proteasome-mediated ubiquitin-dependent protein catabolic process	98	5.94575	0	0			0
An15g01710	atp7	F1Fo-ATP synthase subunit 7	82	5.91855	0	0			0
An02g07040	scl1	20S CP alpha subunit of the proteasome	119	5.88388	0	0			0
An12g05320		Ortholog of A. nidulans FGSC A4 : AN7124, A. niger CBS 513.88 : An09g02090, A. oryzae RIB40 : AO090038000612, AO090003001456 and Aspergillus wentii : Aspwe1_0043585, Aspwe1_0186797	81	5.88017	0	0			0
An07g03680		Ortholog of A. nidulans FGSC A4 : AN1133, A. fumigatus Af293 : Afu5g09310, A. oryzae RIB40 : AO090020000537, Aspergillus wentii : Aspwe1_0099581 and Aspergillus sydowii : Aspsy1_0059490	127	5.84241	0	0			6
An12g01020		Putative amidase/acetamidase	263	5.6948	0	0			0
An10g00400	gelA	Putative 1,3-beta-glucanosyltransferase; predicted signal peptide secretion sequence; induced by caspofungin; expressed during germination	208	5.69117	0	0			1
An16g05570		Aspartate transaminase; phenylalanine:alphaketoglutarate aminotransferase	210	5.62338	0	0			0
An12g07770		Ortholog of A. nidulans FGSC A4 : AN11117, A. fumigatus Af293 : Afu3g01420, A. oryzae RIB40 : AO090120000171, Aspergillus wentii : Aspwe1_0148352, Aspwe1_0165444 and Aspergillus sydowii : Aspsy1_0092105	96	5.60769	0	0			0
An02g07720	gaaC	Putative 2-keto-3-deoxy-l-galactonate aldolase; predicted role in pectin degradation	2	0.0747552	0	0			0
An02g07760		Ortholog of A. nidulans FGSC A4 : AN2853, A. fumigatus Af293 : Afu3g11955, Aspergillus wentii : Aspwe1_0169180, Aspergillus sydowii : Aspsy1_0042758 and Aspergillus carbonarius ITEM 5010 : Acar5010_203700	104	5.60568	0	0			0
An04g02120		Ortholog(s) have role in ribosomal large subunit assembly and cytosolic large ribosomal subunit localization	77	5.49451	0	0			0
An14g03300		Protein of unknown function	183	5.44615	0	0			0
An08g00950		Ortholog(s) have structural constituent of ribosome activity and mitochondrial large ribosomal subunit, mitochondrial ribosome localization	83	5.4291	0	0			0
An11g04370		Cytochrome b5	60	5.4211	0	0			1
An09g00480		Ortholog of A. nidulans FGSC A4 : AN9531, AN1600, AN9354, AN4608 and A. fumigatus Af293 : Afu4g03520, Afu5g14130, Afu7g06920	134	5.41122	0	0			0
An16g01350		Ortholog of A. nidulans FGSC A4 : AN7617, A. fumigatus Af293 : Afu4g00235, Neosartorya fischeri NRRL 181 : NFIA_045390, Aspergillus wentii : Aspwe1_0160305 and Aspergillus versicolor : Aspve1_0054503	34	5.40509	0	0			0
An12g04860		Cytoplasmic ribosomal protein of the large subunit L30	46	5.39914	0	0			0
An12g00510		Ortholog(s) have role in maturation of SSU-rRNA from tricistronic rRNA transcript (SSU-rRNA, 5.8S rRNA, LSU-rRNA)	57	5.34221	0	0			0
An08g09780		Ortholog of A. nidulans FGSC A4 : AN7973, A. fumigatus Af293 : Afu3g02175, A. niger CBS 513.88 : An08g11410, An03g06600 and A. oryzae RIB40 : AO090023000748	155	5.31865	0	0			0
An02g08970		Has domain(s) with predicted role in transmembrane transport and integral component of membrane localization	4	0.0776438	0	0			12
An02g09030		Ortholog of A. nidulans FGSC A4 : AN3179, A. fumigatus Af293 : Afu3g13160, A. oryzae RIB40 : AO090012000817, Aspergillus wentii : Aspwe1_0038173 and Aspergillus sydowii : Aspsy1_0056130	3	0.0639671	0	0			0
An07g07690		Has domain(s) with predicted RNA binding, nucleic acid binding, nucleotide binding activity, role in RNA processing and cytoplasm, nucleus localization	68	5.30437	0	0			0
An12g03900		DNA-directed RNA polymerase	54	5.2572	0	0			0
An12g07570	sncA	Predicted vesicular SNARE, involved in vesicular transport	50	5.23287	0	0			1
An02g04160		Mitochondrial phosphate translocator	127	5.1785	0	0			0
An18g04180		Ortholog(s) have structural constituent of ribosome activity, role in rRNA export from nucleus, ribosomal small subunit biogenesis and cytosolic small ribosomal subunit localization	61	5.17629	0	0			0
An08g08740		Ortholog(s) have role in endonucleolytic cleavage in ITS1 to separate SSU-rRNA from 5.8S rRNA and LSU-rRNA from tricistronic rRNA transcript (SSU-rRNA, 5.8S rRNA, LSU-rRNA), rRNA export from nucleus and extracellular region localization	64	5.15236	0	0			0
An01g00390		Protein of unknown function	121	5.15127	0	0			0
An01g07640		Ortholog(s) have dihydroceramidase activity, role in ceramide biosynthetic process, ceramide catabolic process and endoplasmic reticulum localization	134	5.13076	0	0			7
An18g06810		Ortholog(s) have 6,7-dimethyl-8-ribityllumazine synthase activity, riboflavin binding activity, role in riboflavin biosynthetic process and intracellular, mitochondrial intermembrane space localization	85	5.05926	0	0			0
An08g00900		Protein of unknown function	22	5.02355	0	0			#N/A
An11g04620		Ortholog(s) have endopeptidase activity and role in proteasomal ubiquitin-independent protein catabolic process, proteasome-mediated ubiquitin-dependent protein catabolic process	109	5.01435	0	0			0
An01g12810		Ortholog(s) have endoplasmic reticulum, plasma membrane localization	85	5.01176	0	0			2
An02g05890	epsA	Putative thioredoxin domain protein; expression enhanced by maltose	291	4.99267	0	0			1
An07g03610		Ortholog of A. nidulans FGSC A4 : AN9482, A. fumigatus Af293 : Afu5g09370, A. oryzae RIB40 : AO090020000554, Aspergillus wentii : Aspwe1_0048231 and Aspergillus sydowii : Aspsy1_0035062	71	4.95378	0	0			0
An12g08380		Ortholog(s) have actin filament binding, molecular adaptor activity, role in Arp2/3 complex-mediated actin nucleation, actin cortical patch organization, cellular response to drug, spore germination and Arp2/3 protein complex localization	67	4.94968	0	0			0
An02g10610		Ortholog of A. fumigatus Af293 : Afu3g02430, Aspergillus tubingensis : Asptu1_0074938, Aspergillus brasiliensis : Aspbr1_0038097, Aspbr1_0207697 and Aspergillus flavus NRRL 3357 : AFL2T_08038	1	0.0236069	0	0			0
An09g06720		Protein of unknown function	85	4.94215	0	0			3
An12g07760		Ortholog(s) have palmitoyl-(protein) hydrolase activity and role in protein deacylation	96	4.9412	0	0			0
An07g05990		Has domain(s) with predicted phosphatidylinositol binding activity and role in cell communication	322	4.91966	0	0			0
An07g04430		Has domain(s) with predicted transmembrane transporter activity, role in transmembrane transport and integral component of membrane, membrane localization	202	4.80472	0	0			12
An05g00140		Signal recognition particle (SRP) receptor beta subunit	122	4.77316	0	0			1
An09g06460		Has domain(s) with predicted protein phosphatase inhibitor activity and role in regulation of phosphoprotein phosphatase activity, regulation of signal transduction	111	4.74162	0	0			0
An16g03710		Ortholog of A. nidulans FGSC A4 : AN4989, A. fumigatus Af293 : Afu3g09980, Aspergillus sydowii : Aspsy1_0042878 and Aspergillus terreus NIH2624 : ATET_04521	52	4.69829	0	0			1
An15g00040		Protein of unknown function	73	4.63029	0	0			0
An02g11360		Ortholog of A. nidulans FGSC A4 : AN2953, A. fumigatus Af293 : Afu3g07890, A. oryzae RIB40 : AO090005001486, Aspergillus wentii : Aspwe1_0041944 and Aspergillus sydowii : Aspsy1_0056308	1	0.038762	0	0			1
An02g11570		Ortholog(s) have structural constituent of ribosome activity and mitochondrial large ribosomal subunit, mitochondrion localization	1	0.0486778	0	0			0
An16g09280		Ortholog of A. oryzae RIB40 : AO090103000005, Aspergillus wentii : Aspwe1_0117885, Aspergillus versicolor : Aspve1_0880006 and Aspergillus sydowii : Aspsy1_0055893	76	4.61099	0	0			0
An13g01110		Ortholog(s) have role in cellular response to freezing and fungal-type vacuole localization	97	4.56259	0	0			0
An02g06120		Prephenate dehydrogenase (NADP+)	158	4.55115	0	0			0
An12g02120		Ortholog of A. nidulans FGSC A4 : AN8062, A. fumigatus Af293 : Afu7g04870, A. oryzae RIB40 : AO090012000050, Neosartorya fischeri NRRL 181 : NFIA_025830 and Aspergillus clavatus NRRL 1 : ACLA_006570	128	4.54106	0	0			0
An11g01810		Ortholog of A. nidulans FGSC A4 : AN3935, A. oryzae RIB40 : AO090003000098, Neosartorya fischeri NRRL 181 : NFIA_053920, Aspergillus wentii : Aspwe1_0032581 and Aspergillus versicolor : Aspve1_0664899	55	4.51463	0	0			1
An02g01740		Ortholog(s) have phenylalanine-tRNA ligase activity, role in mitochondrial phenylalanyl-tRNA aminoacylation and mitochondrion localization	180	4.38951	0	0			0
An16g09250		Ortholog(s) have role in mitochondrial translation and mitochondrion localization	95	4.35436	0	0			0
An14g00060		NADH-ubiquinone oxidoreductase	64	4.25274	0	0			2
An15g00140	tupA	Transcriptional repressor that controls expression of genes involved in cell wall biosynthesis, development, and nitrogen source utilization	200	4.25004	0	0			0
An12g10350		Ortholog of A. niger CBS 513.88 : An15g07090, Neosartorya fischeri NRRL 181 : NFIA_091810, Aspergillus wentii : Aspwe1_0171052 and Aspergillus versicolor : Aspve1_0080842	28	4.23673	0	0			0
An04g08480		Ortholog(s) have SNAP receptor activity, palmitoyltransferase activity	61	4.23255	0	0			0
An07g02200		Protein involved in siroheme biosythesis	79	4.20403	0	0			0
An01g03070		Ortholog(s) have structural constituent of ribosome activity and mitochondrial large ribosomal subunit, mitochondrion localization	45	4.18629	0	0			0
An02g12430	icdA	NADP+-specific isocitrate dehydrogenase; induced by growth on starch and lactate	2	0.0606709	0	0			0
An02g02880		Ortholog(s) have GTP binding, GTPase activity	61	4.18629	0	0			0
An18g06260		Has domain(s) with predicted translation initiation factor activity and eukaryotic translation initiation factor 3 complex localization	89	4.18629	0	0			0
An07g10420		Ortholog(s) have aminophospholipid flippase activity and role in actin cortical patch localization, endocytosis, intracellular protein transport, phospholipid translocation, retrograde transport, endosome to Golgi	134	4.17591	0	0			2
An13g01040		Putative Rab geranylgeranyltransferase; induced by caspofungin	111	4.1613	0	0			0
An06g00160		Ortholog(s) have extracellular region localization	54	4.16061	0	0			0
An18g05430		Ortholog(s) have role in ATP export, ESCRT III complex assembly, cellular response to anoxia, cellular response to drug, cellular response to lithium ion, cellular response to pH and filamentous growth, more	73	4.1112	0	0			0
An02g13650		Ortholog of A. nidulans FGSC A4 : AN6672, A. fumigatus Af293 : Afu4g00380, Neosartorya fischeri NRRL 181 : NFIA_045260, Aspergillus wentii : Aspwe1_0119957 and Aspergillus versicolor : Aspve1_0052258	1	0.0848573	0	0			0
An02g13770		Ortholog of A. nidulans FGSC A4 : AN4257, A. fumigatus Af293 : Afu6g12230, Afu7g04010, A. niger CBS 513.88 : An13g00460 and A. oryzae RIB40 : AO090026000813, AO090120000195	2	0.0428631	0	0			1
An07g09220		Ortholog of A. nidulans FGSC A4 : AN5191, A. fumigatus Af293 : Afu6g07250, A. oryzae RIB40 : AO090005001576, Neosartorya fischeri NRRL 181 : NFIA_052930 and Aspergillus wentii : Aspwe1_0040868	118	4.09378	0	0			0
An12g00320		Adenine phosphoribosyltransferase with a predicted role in adenine salvage pathway	71	4.09028	0	0			0
An07g09160		Ortholog(s) have cargo receptor activity and role in ascospore formation, axial cellular bud site selection, endoplasmic reticulum to Golgi vesicle-mediated transport	45	4.06582	0	0			3
An05g00430		Ortholog of A. fumigatus Af293 : Afu2g07840, A. oryzae RIB40 : AO090701000806, Neosartorya fischeri NRRL 181 : NFIA_083550, Aspergillus wentii : Aspwe1_0629899 and Aspergillus versicolor : Aspve1_0082834	57	4.04438	0	0			0
An11g05260		Ortholog(s) have role in syncytium formation by plasma membrane fusion, vacuolar proton-transporting V-type ATPase complex assembly and integral component of endoplasmic reticulum membrane localization	57	4.04438	0	0			2
An14g04160	cof1	Cofilin	50	4.02528	0	0			0
An03g05960		Has domain(s) with predicted catalytic activity	91	3.98208	0	0			0
An07g02310		Ortholog(s) have glutathione peroxidase activity, glutathione transferase activity and cytoplasm, intracellular, nucleus localization	70	3.96001	0	0			0
An02g14685		Has domain(s) with predicted nucleic acid binding, nucleotide binding activity	2	0.0432319	0	0			#N/A
An02g14710		Ortholog of A. nidulans FGSC A4 : AN7443, A. fumigatus Af293 : Afu2g06100, A. oryzae RIB40 : AO090001000726, Aspergillus wentii : Aspwe1_0110234 and Aspergillus sydowii : Aspsy1_0152786	3	0.0517536	0	0			7
An11g06160		Proline dehydrogenase	151	3.95906	0	0			0
An04g06160		Ortholog(s) have ferrous iron binding, ferroxidase activity, iron chaperone activity and role in cellular iron ion homeostasis, cellular response to oxidative stress, glutathione metabolic process, iron-sulfur cluster assembly	69	3.95691	0	0			0
An02g04660		Ortholog(s) have protein folding chaperone activity, role in mitochondrial respiratory chain complex II assembly and mitochondrial matrix localization	44	3.94708	0	0			0
An18g03990		Has domain(s) with predicted role in transmembrane transport and integral component of membrane localization	151	3.91816	0	0			10
An02g10420		Ortholog of A. nidulans FGSC A4 : AN8020, AN0195, A. fumigatus Af293 : Afu5g02380, A. niger CBS 513.88 : An03g04900 and A. oryzae RIB40 : AO090001000067, AO090102000350	160	3.917	0	0			2
An01g02340		Ortholog(s) have carbonyl reductase (NADPH) activity, oxidoreductase activity, serine 3-dehydrogenase activity and intracellular localization	98	3.90721	0	0			0
An16g09240		Ortholog of A. nidulans FGSC A4 : AN1405, A. fumigatus Af293 : Afu8g03950, A. oryzae RIB40 : AO090103000008, Aspergillus wentii : Aspwe1_0043787 and Aspergillus sydowii : Aspsy1_0041996	111	3.90486	0	0			0
An15g05690		Ortholog(s) have fungal biofilm matrix localization	50	3.90027	0	0			0
An12g01330		Ortholog(s) have translation initiation factor activity and role in translational initiation	77	3.89933	0	0			0
An09g03990		Cytochrome c oxidase subunit I	19	3.84869	0	0			1
An02g06040		Ortholog(s) have structural constituent of ribosome activity and fungal-type vacuole, mitochondrial large ribosomal subunit, mitochondrial ribosome localization	51	3.83535	0	0			0
An15g05970		Ortholog of A. nidulans FGSC A4 : AN10270, A. fumigatus Af293 : Afu2g15720, A. oryzae RIB40 : AO090012000253, Neosartorya fischeri NRRL 181 : NFIA_090950 and Aspergillus wentii : Aspwe1_0182342	98	3.83417	0	0			0
An15g06290		Ortholog(s) have 4 iron, 4 sulfur cluster binding, ATPase activity, iron ion binding activity, role in iron-sulfur cluster assembly, tRNA wobble uridine modification and Nbp35-Cfd1 ATPase complex, cytoplasm, nucleus localization	105	3.83338	0	0			0
An01g13060		Ortholog of Aspergillus acidus : Aspfo1_0128974	57	3.82811	0	0			0
An14g01010		Ortholog(s) have structural constituent of ribosome activity	83	3.80433	0	0			0
An14g02540		Ortholog(s) have role in cellular response to hypoxia, pathogenesis and nucleus localization	96	3.80332	0	0			0
An12g04790		Ortholog of A. fumigatus Af293 : Afu2g09140, Aspergillus clavatus NRRL 1 : ACLA_080950, Aspergillus niger ATCC 1015 : 42387-mRNA and Aspergillus tubingensis : Asptu1_0047655	60	3.7866	0	0			0
An08g06485		Protein of unknown function	25	3.78279	0	0			0
An03g03500		Ortholog of A. nidulans FGSC A4 : AN4162, A. fumigatus Af293 : Afu4g13160, A. oryzae RIB40 : AO090009000265, Aspergillus wentii : Aspwe1_0033807 and Aspergillus sydowii : Aspsy1_0032791	3	0.0775239	0	0			1
An12g07730		Has domain(s) with predicted copper ion transmembrane transporter activity, role in copper ion transmembrane transport and integral component of membrane localization	49	3.77537	0	0			1
An16g09070		Putative glucosamine-6-phosphate deaminase; expression induced by tunicamycin and DTT	106	3.74997	0	0			0
An03g05530		Endo-beta-1,4-glucanase	74	3.73236	0	0			0
An08g10310		Ortholog(s) have ubiquitin conjugating enzyme activity, ubiquitin protein ligase activity	54	3.72626	0	0			0
An01g03560		Ortholog(s) have DNA binding, bending, double-stranded DNA binding, four-way junction DNA binding, sequence-specific DNA binding activity	90	3.71809	0	0			0
An04g00990	gdhA	NADP-dependent glutamate dehydrogenase; induced by growth on starch and lactate; expression repressed by tunicamycin and DTT	136	3.70501	0	0			0
An01g03100		Putative vacuolar Ca2+/H+ exchanger	126	3.63774	0	0			11
An02g03590	gal7	UTP-hexose-1-phosphate uridylyltransferase (UDP-galactose pyrophosphorylase); Leloir pathway enzyme	111	3.61149	0	0			0
An18g03550		Has domain(s) with predicted antiporter activity, bile acid:sodium symporter activity, inorganic anion transmembrane transporter activity, role in sodium ion transport and integral component of membrane, membrane localization	107	3.60268	0	0			10
An13g01210		Ortholog(s) have endopeptidase activity and role in proteasomal ubiquitin-independent protein catabolic process, proteasome-mediated ubiquitin-dependent protein catabolic process	66	3.55745	0	0			0
An16g04190		Protein of unknown function	62	3.55548	0	0			0
An16g04500		Ortholog(s) have protein kinase activity, protein serine/threonine kinase activity	120	3.5544	0	0			0
An07g03290		Enoyl-ACP reductase	94	3.54515	0	0			0
An03g06250		Ortholog of Aspergillus tubingensis : Asptu1_0061173, Aspergillus brasiliensis : Aspbr1_0078384, Neosartorya fischeri NRRL 181 : NFIA_033260 and Aspergillus versicolor : Aspve1_0050768	2	0.0218605	0	0			0
An14g00180		Ortholog(s) have protein domain specific binding, ubiquitin protein ligase binding activity	110	3.54225	0	0			0
An03g06560		Triacylglycerol lipase	2	0.0446141	0	0			0
An01g05650		Ortholog(s) have structural constituent of cytoskeleton activity	124	3.46838	0	0			0
An16g09040		Ortholog(s) have N-acetylglucosamine-6-phosphate deacetylase activity	117	3.45739	0	0			0
An07g08533		Ortholog of Aspergillus tubingensis : Asptu1_0057986 and Aspergillus brasiliensis : Aspbr1_0054665	28	3.44754	0	0			0
An14g06350		Has domain(s) with predicted endonuclease activity, role in rRNA processing and Las1 complex localization	110	3.41105	0	0			0
An06g00310		Ortholog(s) have extracellular region localization	167	3.39374	0	0			0
An10g00350		Ortholog(s) have intracellular localization	122	3.3823	0	0			0
An03g06420		Has domain(s) with predicted N-acetyltransferase activity	71	3.37758	0	0			0
An16g00930		Ortholog(s) have intracellular localization	63	3.36685	0	0			0
An04g01230	ecmA	Putative cell wall organization protein	106	3.31155	0	0			0
An04g00270		Ortholog of A. nidulans FGSC A4 : AN4312, A. fumigatus Af293 : Afu4g06040, A. oryzae RIB40 : AO090023000991, Aspergillus wentii : Aspwe1_0101375 and Aspergillus sydowii : Aspsy1_0036593	3	0.0515412	0	0			1
An01g02830		Ortholog(s) have thiosulfate sulfurtransferase activity	58	3.28115	0	0			0
An04g00490		Ortholog(s) have protein kinase regulator activity, protein serine/threonine kinase inhibitor activity	1	0.0345024	0	0			0
An14g05765		Ortholog of Aspergillus tubingensis : Asptu1_0194943, Aspergillus brasiliensis : Aspbr1_0190598, Aspergillus kawachii : Aspka1_0180892 and Aspergillus acidus : Aspfo1_0034914	33	3.26333	0	0			1
An02g09740		Ortholog(s) have DNA-binding transcription activator activity, RNA polymerase II-specific, RNA polymerase II proximal promoter sequence-specific DNA binding activity	206	3.26246	0	0			1
An03g05050		Has domain(s) with predicted oxidoreductase activity and role in metabolic process	68	3.23486	0	0			0
An18g06760		Putative isocitrate dehydrogenase (NAD+)	99	3.22106	0	0			0
An14g00120		Ortholog of Aspergillus tubingensis : Asptu1_0060574	63	3.2163	0	0			0
An08g12110		Has domain(s) with predicted ATP binding, protein kinase activity, transferase activity, transferring phosphorus-containing groups activity and role in protein phosphorylation	195	3.20547	0	0			0
An09g06590	sspB	Hsp90 chaperone	179	3.19778	0	0			0
An07g09460	Tan1	Transposable element inserted in the niaD locus	141	3.1849	0	0			0
An04g05130		Aspartate transaminase; phenylalanine:alphaketoglutarate aminotransferase	122	3.1788	0	0			0
An08g11230		Protein of unknown function	92	3.17422	0	0			0
An15g00560	actA	Actin structural protein	95	3.17312	0	0			0
An14g06300		Ortholog(s) have structural constituent of ribosome activity and mitochondrial large ribosomal subunit, mitochondrion localization	71	3.07476	0	0			0
An01g03570	mcr1	Cytochrome-b5 reductase	79	3.07168	0	0			0
An12g03780		Has domain(s) with predicted cytoskeletal regulatory protein binding activity and role in regulation of actin nucleation	99	3.06239	0	0			2
An05g00200		Ortholog(s) have G-protein beta/gamma-subunit complex binding, palmitoyltransferase activity	177	3.03678	0	0			5
An11g06140		1-pyrroline-5-carboxylate dehydrogenase	140	3.03669	0	0			0
An15g00550		Protein of unknown function	69	3.0089	0	0			0
An05g00110		Ortholog(s) have role in mitochondrial protein processing, mitochondrial proton-transporting ATP synthase complex assembly and extrinsic component of mitochondrial inner membrane, mitochondrial intermembrane space localization	57	3.0078	0	0			0
An02g11970		Ortholog(s) have alkaline phosphatase activity, phosphatase activity, phosphoglycolate phosphatase activity, phosphoprotein phosphatase activity	64	2.99541	0	0			0
An02g07320		Enoyl-CoA hydratase	72	2.98429	0	0			0
An11g00410		Ortholog(s) have intracellular localization	86	2.97538	0	0			0
An09g05630		Ortholog of A. nidulans FGSC A4 : AN8200, A. fumigatus Af293 : Afu5g03310, A. oryzae RIB40 : AO090102000535, Aspergillus wentii : Aspwe1_0030105 and Aspergillus sydowii : Aspsy1_0136711	31	2.97195	0	0			1
An01g10100		Has domain(s) with predicted catalytic activity, pyridoxal phosphate binding, transaminase activity	108	2.95503	0	0			0
An04g02070		Putative clathrin heavy chain; expression enhanced by maltose	1	0.00747552	0	0			0
An16g03500		Ortholog of A. nidulans FGSC A4 : AN5004, Aspergillus wentii : Aspwe1_0024962, Aspergillus clavatus NRRL 1 : ACLA_037640 and Aspergillus niger ATCC 1015 : 41113-mRNA	30	2.94349	0	0			1
An08g11190	ank1	Ankyrin	204	2.93809	0	0			0
An14g06480		Ortholog(s) have Prp19 complex, U1 snRNP, U2 snRNP, U2-type prespliceosome, U4/U6 x U5 tri-snRNP complex, U5 snRNP, post-mRNA release spliceosomal complex, spliceosomal complex localization	27	2.92319	0	0			#N/A
An08g05870		Ortholog(s) have role in SCF-dependent proteasomal ubiquitin-dependent protein catabolic process and SCF ubiquitin ligase complex, nuclear SCF ubiquitin ligase complex localization	178	2.9222	0	0			0
An01g00460		Protein of unknown function	57	2.8982	0	0			0
An02g02290		1-pyrroline-5-carboxylate dehydrogenase	132	2.8982	0	0			0
An04g02440		Ortholog of Aspergillus tubingensis : Asptu1_0046747, Aspergillus brasiliensis : Aspbr1_0044185, Aspergillus kawachii : Aspka1_0172943 and Aspergillus acidus : Aspfo1_0044902	1	0.0697715	0	0			0
An16g01780		Ortholog of A. fumigatus Af293 : Afu5g01920, A. oryzae RIB40 : AO090003001326, Aspergillus wentii : Aspwe1_0174201, Aspergillus sydowii : Aspsy1_0029040 and Aspergillus terreus NIH2624 : ATET_09813	45	2.88342	0	0			0
An16g03430		Has domain(s) with predicted metal ion binding activity	70	2.85429	0	0			0
An01g07100		Ortholog of A. nidulans FGSC A4 : AN10695	59	2.81739	0	0			0
An04g02530		Ortholog of A. nidulans FGSC A4 : AN3834, A. fumigatus Af293 : Afu4g08090, A. oryzae RIB40 : AO090023000760, Aspergillus wentii : Aspwe1_0064360 and Aspergillus sydowii : Aspsy1_0057405	2	0.0293432	0	0			0
An15g02200	aod1	Alcohol oxidase; induced by growth on starch and lactate	135	2.81169	0	0			0
An01g05370		Ortholog of A. nidulans FGSC A4 : AN0301, A. fumigatus Af293 : Afu1g02770, A. oryzae RIB40 : AO090005000817, Aspergillus wentii : Aspwe1_0169626 and Aspergillus sydowii : Aspsy1_0144698	72	2.74845	0	0			1
An01g08800		Glutamine synthetase; induced by growth on starch and lactate	78	2.72109	0	0			0
An15g03020		Ortholog(s) have K48-linked polyubiquitin modification-dependent protein binding activity and role in proteasome assembly, ubiquitin-dependent protein catabolic process	60	2.72033	0	0			0
An04g03210		Ortholog of A. nidulans FGSC A4 : AN1718, AN1714, A. fumigatus Af293 : Afu4g08380, Afu4g08420, A. niger CBS 513.88 : An04g03190 and A. oryzae RIB40 : AO090023000718	1	0.0458353	0	0			0
An04g06760		Ortholog of Aspergillus brasiliensis : Aspbr1_0132119	55	2.71944	0	0			5
An04g08330		Orotate phosphoribosyltransferase	48	2.70326	0	0			0
An08g03560		Ortholog of A. nidulans FGSC A4 : AN8776, A. oryzae RIB40 : AO090038000281, Aspergillus wentii : Aspwe1_0508022, Aspergillus sydowii : Aspsy1_0035009 and Aspergillus terreus NIH2624 : ATET_00334	117	2.67648	0	0			0
An17g02180		Ortholog(s) have protein-containing complex binding activity, role in endoplasmic reticulum unfolded protein response, ubiquitin-dependent ERAD pathway and endoplasmic reticulum localization	54	2.64914	0	0			4
An14g02010		Has domain(s) with predicted calcium:proton antiporter activity, cation transmembrane transporter activity, role in calcium ion transport, cation transport, transmembrane transport and integral component of membrane localization	97	2.63682	0	0			11
An02g01230		Protein of unknown function	37	2.6253	0	0			0
An01g09020		Has domain(s) with predicted hydrolase activity	67	2.61318	0	0			0
An17g01530	adhA	Alcohol-dehydrogenase	73	2.61196	0	0			0
An12g08270		Has domain(s) with predicted catalytic activity, oxidoreductase activity	84	2.61125	0	0			0
An07g10110		Ortholog(s) have role in cellular response to drug and intracellular, mitotic spindle midzone, proteasome regulatory particle, lid subcomplex, proteasome storage granule localization	74	2.60324	0	0			0
An14g01570		Ortholog(s) have protein folding chaperone activity, role in mitochondrial respiratory chain complex III assembly and mitochondrial matrix, mitochondrion localization	24	2.59839	0	0			0
An11g05760		Ortholog(s) have U2-type spliceosomal complex, post-mRNA release spliceosomal complex localization	73	2.56806	0	0			0
An18g01200		Has domain(s) with predicted electron transfer activity, heme binding, iron ion binding, oxidoreductase activity, acting on paired donors, with incorporation or reduction of molecular oxygen activity and role in oxidation-reduction process	92	2.56759	0	0			0
An02g02700		Phosphoribosylglycinamide formyltransferase	44	2.53482	0	0			0
An08g08840		Glutamate decarboxylase	104	2.53125	0	0			0
An02g13840		Cytoplasmic ribosomal protein of the small subunit S9	39	2.52472	0	0			0
An01g13920		Adenylosuccinate synthetase	85	2.51178	0	0			0
An02g01860		Ortholog of A. nidulans FGSC A4 : AN6245, A. fumigatus Af293 : Afu2g13120, A. oryzae RIB40 : AO090026000269, Aspergillus wentii : Aspwe1_0031335 and Aspergillus sydowii : Aspsy1_0150794	76	2.51178	0	0			1
An04g05630		Ortholog(s) have role in cellular response to DNA damage stimulus, regulation of G2/M transition of mitotic cell cycle and nuclear membrane, nuclear periphery, nuclear pore, nuclear pore outer ring, spindle pole body localization	5	0.0315233	0	0			0
An02g09550	hetC2	Putative het-c2 protein	40	2.51178	0	0			0
An01g01620		Ortholog(s) have high-affinity zinc transmembrane transporter activity, zinc ion transmembrane transporter activity	70	2.50462	0	0			7
An12g03550		Has domain(s) with predicted role in transmembrane transport and integral component of membrane localization	102	2.47298	0	0			10
An03g06140		Protein of unknown function	88	2.47244	0	0			1
An01g07680		Protein of unknown function	108	2.4706	0	0			5
An08g02260	pgkA	Phosphoglycerate kinase	82	2.4637	0	0			0
An11g11210		Ortholog(s) have chromatin binding, mRNA binding activity	99	2.45717	0	0			0
An09g02700		Has domain(s) with predicted oxidoreductase activity, acting on the aldehyde or oxo group of donors, disulfide as acceptor activity and role in metabolic process	87	2.45533	0	0			0
An03g06850		Ortholog(s) have role in establishment of cell polarity, ribosome biogenesis and nucleolus localization	22	2.44509	0	0			0
An11g06900		Has domain(s) with predicted acid-amino acid ligase activity	36	2.44389	0	0			0
An04g06700		Protein of unknown function	25	2.43389	0	0			0
An15g00520		Ortholog(s) have role in late endosome to vacuole transport via multivesicular body sorting pathway and Vps55/Vps68 complex, late endosome localization	25	2.43389	0	0			4
An18g04090		Has domain(s) with predicted heme binding, iron ion binding, oxygen binding activity and role in oxygen transport	53	2.42044	0	0			0
An04g07050		Ortholog(s) have heat shock protein binding activity, role in protein folding and cytoplasm, nucleus localization	2	0.0512607	0	0			0
An11g02590		Ortholog(s) have role in fatty acid metabolic process, fatty acid oxidation, peroxisome fission and endoplasmic reticulum, peroxisomal importomer complex, peroxisomal membrane localization	45	2.3947	0	0			0
An11g06590		Ortholog(s) have 2-hexaprenyl-6-methoxy-1,4-benzoquinone methyltransferase activity, role in aerobic respiration, cellular response to drug, ubiquinone biosynthetic process and mitochondrial matrix, mitochondrion localization	60	2.3846	0	0			0
An07g03520		Protein of unknown function	41	2.37288	0	0			0
An16g09010	protH	Putative protease	56	2.368	0	0			#N/A
An03g04810		Ortholog of A. nidulans FGSC A4 : AN10983, A. fumigatus Af293 : Afu2g01630, A. oryzae RIB40 : AO090701000784, Aspergillus wentii : Aspwe1_0135351 and Aspergillus sydowii : Aspsy1_0046214	51	2.36348	0	0			0
An01g09270		Putative isocitrate lyase	101	2.35333	0	0			0
An15g03400		Protein of unknown function	23	2.34841	0	0			0
An05g00080		Ortholog of A. nidulans FGSC A4 : AN5813, A. oryzae RIB40 : AO090011000939, Aspergillus wentii : Aspwe1_0043753, Aspergillus sydowii : Aspsy1_0201714 and Aspergillus terreus NIH2624 : ATET_06862	57	2.32421	0	0			0
An14g04080		Ubiquinol-cytochrome c reductase	44	2.31209	0	0			0
An01g06060		Rab GTPase	39	2.31036	0	0			0
An14g00620		Putative aminopeptidase; acid protease; expression repressed by tunicamycin and DTT	72	2.30673	0	0			0
An05g02250		Ortholog of A. nidulans FGSC A4 : AN3258, A. fumigatus Af293 : Afu8g07090, A. oryzae RIB40 : AO090001000070, Neosartorya fischeri NRRL 181 : NFIA_099870 and Aspergillus clavatus NRRL 1 : ACLA_017870	47	2.29676	0	0			0
An16g07910		Has domain(s) with predicted phosphatidylinositol binding activity and role in cell communication	52	2.28343	0	0			0
An04g09880		Protein of unknown function	3	0.0683786	0	0			0
An15g00050		Ortholog(s) have SUMO ligase activity, SUMO transferase activity	96	2.26626	0	0			0
An16g02440		Ortholog of A. nidulans FGSC A4 : AN3023, A. fumigatus Af293 : Afu3g08870, A. oryzae RIB40 : AO090005001347, Neosartorya fischeri NRRL 181 : NFIA_068250 and Aspergillus wentii : Aspwe1_0041800	96	2.26201	0	0			0
An14g03410		Ortholog of A. nidulans FGSC A4 : AN6527, AN5581, A. fumigatus Af293 : Afu6g04900, Afu4g11477, A. niger CBS 513.88 : An04g05110 and A. oryzae RIB40 : AO090701000049, AO090003001075	65	2.24266	0	0			0
An18g03900		Putative prefoldin subunit 2; induced by caspofungin	35	2.24266	0	0			0
An15g06310		Phosphatidylethanolamine N-methyltransferase	173	2.23988	0	0			7
An12g03570	pyrG	Orotidine-5'-phosphate decarboxylase; mutants show decreased resistance to weak acid preservatives	50	2.23468	0	0			0
An11g05680		Has domain(s) with predicted electron transfer activity, heme binding, iron ion binding, oxidoreductase activity, acting on paired donors, with incorporation or reduction of molecular oxygen activity and role in oxidation-reduction process	96	2.23269	0	0			1
An07g09120		Has domain(s) with predicted aminopeptidase activity, metalloexopeptidase activity, zinc ion binding activity and role in cellular process, proteolysis	67	2.23195	0	0			0
An06g01120		Ortholog(s) have proteasome binding, single-stranded DNA binding, single-stranded DNA helicase activity, ubiquitin conjugating enzyme activity, ubiquitin-protein transferase activity	27	2.23085	0	0			0
An08g11790		Has domain(s) with predicted ATP binding, protein kinase activity and role in protein phosphorylation	38	2.23008	0	0			0
An09g03950		Has domain(s) with predicted ATP binding, aminoacyl-tRNA ligase activity, tryptophan-tRNA ligase activity, role in tRNA aminoacylation for protein translation, tryptophanyl-tRNA aminoacylation and cytoplasm localization	77	2.22819	0	0			0
An01g06460		Protein of unknown function	76	2.19925	0	0			2
An14g05070		Ortholog(s) have role in cellular response to farnesol, cellular response to heat, cellular response to hydrogen peroxide, sterigmatocystin biosynthetic process and cytoplasm, peroxisome localization	49	2.17451	0	0			0
An15g03810		Has domain(s) with predicted carbon-sulfur lyase activity and role in metabolic process	28	2.17067	0	0			0
An13g00180		Protein of unknown function	18	2.15295	0	0			0
An02g10730		Ortholog of A. nidulans FGSC A4 : AN8034, A. fumigatus Af293 : Afu5g02210, A. oryzae RIB40 : AO090102000294, Aspergillus wentii : Aspwe1_0114775 and Aspergillus sydowii : Aspsy1_0033693	94	2.14253	0	0			0
An06g01810		Has domain(s) with predicted serine-type endopeptidase activity, role in retrograde vesicle-mediated transport, Golgi to endoplasmic reticulum and integral component of membrane localization	63	2.1384	0	0			5
An04g02420		Ortholog(s) have ornithine decarboxylase activity and role in DNA biosynthetic process, nuclear division, putrescine biosynthetic process, spermidine biosynthetic process, spore germination	66	2.13081	0	0			#N/A
An07g09740		Has domain(s) with predicted solute:proton antiporter activity, role in cation transport, transmembrane transport and integral component of membrane localization	95	2.13052	0	0			9
An15g06790		Ortholog(s) have cytoplasm localization	83	2.12732	0	0			0
An09g06750		Ortholog of A. nidulans FGSC A4 : AN12207, A. fumigatus Af293 : Afu5g04280, A. oryzae RIB40 : AO090102000634, Aspergillus wentii : Aspwe1_0053134 and Aspergillus sydowii : Aspsy1_0518128	47	2.12326	0	0			0
An14g07040		Has domain(s) with predicted DNA-binding transcription factor activity, RNA polymerase II-specific, zinc ion binding activity, role in regulation of transcription, DNA-templated and nucleus localization	71	2.12305	0	0			0
An02g04640		Ortholog(s) have mitochondrion localization	60	2.12263	0	0			0
An14g00080		Ortholog(s) have Ran guanyl-nucleotide exchange factor activity	97	2.12232	0	0			0
An02g05470		NADH-ubiquinone oxidoreductase; respiratory-chain NADH dehydrogenase	80	2.10631	0	0			0
An06g00590		Ortholog of Aspergillus brasiliensis : Aspbr1_0040727, Aspergillus kawachii : Aspka1_0178283, Aspergillus wentii : Aspwe1_0099088 and Aspergillus versicolor : Aspve1_0086573	1	0.0799929	0	0			0
An14g06760		Ortholog(s) have uracil-5-carboxylate decarboxylase activity	64	2.09315	0	0			0
An15g02000		Biotin synthase with a predicted role in biotin biosynthesis	64	2.08771	0	0			0
An06g01050		Has domain(s) with predicted role in response to stress and integral component of membrane localization	2	0.0854345	0	0			7
An04g01300		Ortholog of A. nidulans FGSC A4 : AN12229, A. fumigatus Af293 : Afu4g06960, A. oryzae RIB40 : AO090023000891, Aspergillus wentii : Aspwe1_0034659 and Aspergillus sydowii : Aspsy1_0036698	51	2.07955	0	0			0
An11g10960		Ortholog of A. nidulans FGSC A4 : AN10411, A. fumigatus Af293 : Afu3g05670, A. oryzae RIB40 : AO090020000037, Neosartorya fischeri NRRL 181 : NFIA_071520 and Aspergillus wentii : Aspwe1_0173697	45	2.07776	0	0			0
An08g03760		Protein of unknown function; expression repressed by tunicamycin and DTT	28	2.06852	0	0			0
An02g01022		Protein of unknown function	13	2.06665	0	0			0
An04g06950		Has domain(s) with predicted DNA binding, DNA-binding transcription factor activity, sequence-specific DNA binding activity and role in regulation of transcription, DNA-templated	56	2.06246	0	0			0
An06g01300	sidC	Putative nonribosomal peptide synthase (NRPS), encoded in a predicted secondary metabolite gene cluster	27	0.0713122	0	0			0
An07g02160	mdh1	Mitochondrial malate dehydrogenase	56	2.06246	0	0			0
An14g05730		Ortholog of A. nidulans FGSC A4 : AN2683, AN5069, A. fumigatus Af293 : Afu5g02860, Afu5g14320, A. niger CBS 513.88 : An09g04830 and A. oryzae RIB40 : AO090102000482, AO090001000197	56	2.06246	0	0			6
An05g02070		Putative alcohol dehydrogenase (catalyzed by glycerol dehydrogenase II (NADP+)	22	2.06191	0	0			#N/A
An02g13850		Ortholog(s) have cytosolic large ribosomal subunit localization	26	2.05365	0	0			0
An08g06720		Has domain(s) with predicted FAD binding, oxidoreductase activity and role in metabolic process	101	2.04259	0	0			0
An13g03150		Has domain(s) with predicted catalytic activity and role in metabolic process	63	2.0392	0	0			0
An14g00530		Ortholog(s) have role in cellular copper ion homeostasis and yeast-form cell wall localization	18	2.03657	0	0			0
An08g06160		Ortholog(s) have farnesyltranstransferase activity and role in terpenoid biosynthetic process	63	2.02874	0	0			0
An16g05520		Ortholog(s) have copper chaperone activity, superoxide dismutase copper chaperone activity	40	2.02563	0	0			0
An09g04080		Ortholog of A. nidulans FGSC A4 : AN2514, A. fumigatus Af293 : Afu3g14280, A. oryzae RIB40 : AO090020000623, Aspergillus wentii : Aspwe1_0049956 and Aspergillus sydowii : Aspsy1_0736673	49	2.02429	0	0			0
An06g01960		Putative benzonitrilase	1	0.0352777	0	0			0
An11g00420		Ortholog(s) have phosphoprotein phosphatase activity, protein serine/threonine phosphatase activity	53	2.01703	0	0			0
An05g00050		Ortholog(s) have dipeptidase activity	75	2.01695	0	0			0
An01g01990		Ortholog of Aspergillus brasiliensis : Aspbr1_0205234	13	2.01562	0	0			0
An04g01100		Has domain(s) with predicted nucleoside-triphosphatase activity, nucleotide binding activity	38	2.01366	0	0			0
An07g04320		Ortholog(s) have L-arabinitol 2-dehydrogenase activity and role in D-arabinose catabolic process, D-arabitol catabolic process to xylulose 5-phosphate	46	2.01292	0	0			0
An02g01480		MFS multidrug transporter	97	1.99707	0	0			7
An14g03820	gal10	UDP-glucose 4-epimerase; Leloir pathway enzyme	59	1.99187	0	0			0
An15g06470		Putative signal sequence receptor alpha; expression enhanced by maltose; expression induced by tunicamycin and DTT	41	1.95785	0	0			1
An15g00460		Ortholog(s) have endosome localization	90	1.95216	0	0			0
An01g13960		Has domain(s) with predicted carbon-sulfur lyase activity and role in metabolic process	41	1.95043	0	0			0
An12g09700		Has domain(s) with predicted oxidoreductase activity and role in metabolic process	52	1.94944	0	0			0
An12g01280		Argininosuccinate synthase	63	1.90653	0	0			0
An11g07720		Ortholog of Aspergillus tubingensis : Asptu1_0044504, Aspergillus brasiliensis : Aspbr1_0050878, Aspergillus kawachii : Aspka1_0176134 and Aspergillus acidus : Aspfo1_0068064	55	1.90286	0	0			0
An02g07570		Ortholog(s) have lipid binding, oxysterol binding, phosphatidic acid binding, phosphatidylinositol-4,5-bisphosphate binding, phosphatidylinositol-4-phosphate binding, sterol transfer activity	63	1.90195	0	0			0
[truncated: 729 more rows]
