# Supplementary material for: ERV14 receptor impacts mycelial growth via its interactions with cell wall synthase and transporters in Aspergillus niger
Source: Front Microbiol. 2023 Apr 11;14:1128462. doi: 10.3389/fmicb.2023.1128462 (PMC10126429; doi:10.3389/fmicb.2023.1128462)
Supplement: Supplementary file 3 [file Table_2.xlsx]

## Sheet: Table S3 gProfiler  membrane pr
source	term_name	term_id	adjusted_p_value	negative_log10_of_adjusted_p_value	term_size	query_size	intersection_size	effective_domain_size	intersections
GO:MF	transmembrane transporter activity	GO:0022857	7.2083e-17	16.1422	821	208	53	13126	AN15G03940,AN11G01260,AN02G03540,AN10G00680,AN05G01290,AN06G02270,AN03G00230,AN02G08020,AN16G02000,AN19G00340,AN02G08330,AN16G09020,AN14G00970,AN17G01000,AN03G05590,AN11G06150,AN01G11630,AN15G07510,AN02G08970,AN07G04430,AN14G00060,AN18G03990,AN09G03990,AN12G07730,AN01G03100,AN18G03550,AN14G02010,AN01G01620,AN12G03550,AN07G09740,AN02G01480,AN15G05730,AN11G04340,AN16G06950,AN16G01600,AN07G04180,AN1…
GO:MF	transporter activity	GO:0005215	2.2143e-16	15.6548	842	208	53	13126	AN15G03940,AN11G01260,AN02G03540,AN10G00680,AN05G01290,AN06G02270,AN03G00230,AN02G08020,AN16G02000,AN19G00340,AN02G08330,AN16G09020,AN14G00970,AN17G01000,AN03G05590,AN11G06150,AN01G11630,AN15G07510,AN02G08970,AN07G04430,AN14G00060,AN18G03990,AN09G03990,AN12G07730,AN01G03100,AN18G03550,AN14G02010,AN01G01620,AN12G03550,AN07G09740,AN02G01480,AN15G05730,AN11G04340,AN16G06950,AN16G01600,AN07G04180,AN1…
GO:MF	ion transmembrane transporter activity	GO:0015075	1.81313e-08	7.74157	206	208	20	13126	AN11G01260,AN10G00680,AN02G08020,AN19G00340,AN17G01000,AN09G03990,AN12G07730,AN01G03100,AN18G03550,AN14G02010,AN01G01620,AN07G09740,AN15G05730,AN13G02410,AN02G07460,AN02G11700,AN03G03360,AN01G07860,AN17G02220,AN14G02290
GO:MF	inorganic molecular entity transmembrane transporter activity	GO:0015318	2.40936e-08	7.6181	165	208	18	13126	AN11G01260,AN10G00680,AN02G08020,AN19G00340,AN17G01000,AN09G03990,AN12G07730,AN01G03100,AN18G03550,AN14G02010,AN01G01620,AN07G09740,AN15G05730,AN13G02410,AN02G07460,AN02G11700,AN01G07860,AN14G02290
GO:MF	cation transmembrane transporter activity	GO:0008324	1.22151e-07	6.9131	160	208	17	13126	AN11G01260,AN10G00680,AN02G08020,AN19G00340,AN09G03990,AN12G07730,AN01G03100,AN14G02010,AN01G01620,AN07G09740,AN15G05730,AN13G02410,AN02G07460,AN02G11700,AN03G03360,AN17G02220,AN14G02290
GO:MF	inorganic cation transmembrane transporter activity	GO:0022890	1.27231e-06	5.89541	141	208	15	13126	AN11G01260,AN10G00680,AN02G08020,AN19G00340,AN09G03990,AN12G07730,AN01G03100,AN14G02010,AN01G01620,AN07G09740,AN15G05730,AN13G02410,AN02G07460,AN02G11700,AN14G02290
GO:MF	active transmembrane transporter activity	GO:0022804	4.89642e-05	4.31012	185	208	15	13126	AN02G08020,AN19G00340,AN01G11630,AN14G00060,AN09G03990,AN01G03100,AN18G03550,AN14G02010,AN07G09740,AN15G05730,AN07G04180,AN03G03360,AN01G07860,AN17G01770,AN14G02290
GO:MF	metal ion transmembrane transporter activity	GO:0046873	0.000337356	3.47191	71	208	9	13126	AN11G01260,AN19G00340,AN12G07730,AN01G03100,AN14G02010,AN01G01620,AN13G02410,AN02G11700,AN14G02290
GO:MF	active ion transmembrane transporter activity	GO:0022853	0.000338329	3.47066	91	208	10	13126	AN02G08020,AN19G00340,AN09G03990,AN01G03100,AN14G02010,AN07G09740,AN15G05730,AN03G03360,AN01G07860,AN14G02290
GO:MF	solute:cation antiporter activity	GO:0015298	0.000502645	3.29874	15	208	5	13126	AN19G00340,AN01G03100,AN14G02010,AN07G09740,AN03G03360
GO:MF	antiporter activity	GO:0015297	0.000520624	3.28348	26	208	6	13126	AN19G00340,AN01G03100,AN18G03550,AN14G02010,AN07G09740,AN03G03360
GO:MF	secondary active transmembrane transporter activity	GO:0015291	0.00166638	2.77823	47	208	7	13126	AN19G00340,AN01G03100,AN18G03550,AN14G02010,AN07G09740,AN03G03360,AN01G07860
GO:MF	proton transmembrane transporter activity	GO:0015078	0.00181471	2.74119	66	208	8	13126	AN10G00680,AN02G08020,AN19G00340,AN09G03990,AN01G03100,AN14G02010,AN07G09740,AN15G05730
GO:MF	monovalent cation:proton antiporter activity	GO:0005451	0.010828	1.96545	14	208	4	13126	AN19G00340,AN01G03100,AN14G02010,AN07G09740
GO:MF	solute:proton antiporter activity	GO:0015299	0.010828	1.96545	14	208	4	13126	AN19G00340,AN01G03100,AN14G02010,AN07G09740
GO:MF	potassium ion transmembrane transporter activity	GO:0015079	0.0248011	1.60553	17	208	4	13126	AN19G00340,AN01G03100,AN14G02010,AN14G02290
GO:MF	calcium:cation antiporter activity	GO:0015368	0.0261969	1.58175	7	208	3	13126	AN19G00340,AN01G03100,AN14G02010
GO:MF	calcium:proton antiporter activity	GO:0015369	0.0261969	1.58175	7	208	3	13126	AN19G00340,AN01G03100,AN14G02010
GO:MF	potassium:proton antiporter activity	GO:0015386	0.0414255	1.38273	8	208	3	13126	AN19G00340,AN01G03100,AN14G02010
GO:MF	solute:potassium antiporter activity	GO:0022821	0.0414255	1.38273	8	208	3	13126	AN19G00340,AN01G03100,AN14G02010
GO:BP	transport	GO:0006810	3.94787e-20	19.4036	1378	205	77	12115	AN15G03940,AN11G01260,AN02G03540,AN10G00680,AN05G01290,AN06G02270,AN03G00230,AN02G08020,AN14G00950,AN16G02000,AN19G00340,AN02G08330,AN16G09020,AN14G00970,AN17G01000,AN03G05590,AN11G06150,AN01G11630,AN18G06440,AN01G12290,AN15G07510,AN02G08970,AN12G07570,AN01G12810,AN07G04430,AN05G00140,AN07G10420,AN07G09160,AN18G03990,AN09G03990,AN12G07730,AN01G03100,AN18G03550,AN14G02010,AN01G01620,AN12G03550,AN1…
GO:BP	establishment of localization	GO:0051234	1.22084e-19	18.9133	1403	205	77	12115	AN15G03940,AN11G01260,AN02G03540,AN10G00680,AN05G01290,AN06G02270,AN03G00230,AN02G08020,AN14G00950,AN16G02000,AN19G00340,AN02G08330,AN16G09020,AN14G00970,AN17G01000,AN03G05590,AN11G06150,AN01G11630,AN18G06440,AN01G12290,AN15G07510,AN02G08970,AN12G07570,AN01G12810,AN07G04430,AN05G00140,AN07G10420,AN07G09160,AN18G03990,AN09G03990,AN12G07730,AN01G03100,AN18G03550,AN14G02010,AN01G01620,AN12G03550,AN1…
GO:BP	localization	GO:0051179	9.82972e-19	18.0075	1487	205	78	12115	AN15G03940,AN11G01260,AN02G03540,AN10G00680,AN05G01290,AN06G02270,AN03G00230,AN02G08020,AN14G00950,AN16G02000,AN19G00340,AN02G08330,AN16G09020,AN14G00970,AN17G01000,AN03G05590,AN11G06150,AN01G11630,AN18G06440,AN01G12290,AN15G07510,AN02G08970,AN12G07570,AN01G12810,AN07G04430,AN05G00140,AN07G10420,AN07G09160,AN18G03990,AN09G03990,AN12G07730,AN01G03100,AN18G03550,AN14G02010,AN01G01620,AN12G03550,AN1…
GO:BP	transmembrane transport	GO:0055085	3.75449e-14	13.4254	807	205	51	12115	AN15G03940,AN11G01260,AN02G03540,AN10G00680,AN05G01290,AN06G02270,AN03G00230,AN02G08020,AN16G02000,AN19G00340,AN02G08330,AN16G09020,AN14G00970,AN03G05590,AN11G06150,AN01G11630,AN15G07510,AN02G08970,AN07G04430,AN18G03990,AN09G03990,AN12G07730,AN01G03100,AN18G03550,AN14G02010,AN01G01620,AN12G03550,AN07G09740,AN02G01480,AN15G05730,AN11G04340,AN16G06950,AN16G01600,AN04G04970,AN11G01270,AN12G09270,AN1…
GO:BP	ion transport	GO:0006811	1.67545e-07	6.77587	230	205	21	12115	AN11G01260,AN10G00680,AN02G08020,AN14G00950,AN19G00340,AN17G01000,AN09G03990,AN12G07730,AN01G03100,AN18G03550,AN14G02010,AN01G01620,AN07G09740,AN15G05730,AN06G01360,AN13G02410,AN02G07460,AN02G11700,AN03G03360,AN01G07860,AN17G02220
GO:BP	cation transport	GO:0006812	7.22021e-07	6.14145	158	205	17	12115	AN11G01260,AN10G00680,AN02G08020,AN14G00950,AN19G00340,AN09G03990,AN12G07730,AN01G03100,AN14G02010,AN01G01620,AN07G09740,AN15G05730,AN06G01360,AN13G02410,AN02G07460,AN02G11700,AN03G03360
GO:BP	cation transmembrane transport	GO:0098655	1.71555e-06	5.7656	126	205	15	12115	AN11G01260,AN10G00680,AN02G08020,AN19G00340,AN09G03990,AN12G07730,AN01G03100,AN14G02010,AN01G01620,AN07G09740,AN15G05730,AN13G02410,AN02G07460,AN02G11700,AN03G03360
GO:BP	ion transmembrane transport	GO:0034220	4.95963e-06	5.30455	157	205	16	12115	AN11G01260,AN10G00680,AN02G08020,AN19G00340,AN09G03990,AN12G07730,AN01G03100,AN14G02010,AN01G01620,AN07G09740,AN15G05730,AN13G02410,AN02G07460,AN02G11700,AN03G03360,AN01G07860
GO:BP	inorganic ion transmembrane transport	GO:0098660	6.91473e-05	4.16022	101	205	12	12115	AN10G00680,AN02G08020,AN19G00340,AN09G03990,AN12G07730,AN01G03100,AN14G02010,AN01G01620,AN07G09740,AN15G05730,AN02G11700,AN01G07860
GO:BP	inorganic cation transmembrane transport	GO:0098662	0.000245495	3.60996	93	205	11	12115	AN10G00680,AN02G08020,AN19G00340,AN09G03990,AN12G07730,AN01G03100,AN14G02010,AN01G01620,AN07G09740,AN15G05730,AN02G11700
GO:BP	cellular process	GO:0009987	0.00034588	3.46107	5041	205	120	12115	AN15G03940,AN18G01000,AN11G01260,AN02G01870,AN08G00560,AN02G03540,AN09G04010,AN10G00680,AN05G01290,AN06G02270,AN03G00230,AN02G08020,AN06G01550,AN16G02000,AN19G00340,AN02G08330,AN07G02820,AN16G09020,AN14G00970,AN03G05590,AN11G06150,AN01G09480,AN01G11630,AN18G06440,AN02G02190,AN15G07510,AN07G03680,AN10G00400,AN02G08970,AN12G07570,AN01G07640,AN01G12810,AN02G05890,AN07G04430,AN05G00140,AN07G10420,AN0…
GO:BP	metal ion transport	GO:0030001	0.0026724	2.5731	96	205	10	12115	AN11G01260,AN14G00950,AN19G00340,AN12G07730,AN01G03100,AN14G02010,AN01G01620,AN06G01360,AN13G02410,AN02G11700
GO:BP	protein localization to endoplasmic reticulum	GO:0070972	0.00613318	2.21231	31	205	6	12115	AN01G11630,AN01G12810,AN05G00140,AN16G07390,AN07G04070,AN16G08830
GO:BP	vacuolar transport	GO:0007034	0.00773309	2.11165	86	205	9	12115	AN15G00520,AN01G03350,AN06G01360,AN04G01530,AN15G00540,AN04G05980,AN08G08980,AN17G02220,AN12G04710
GO:BP	vesicle-mediated transport	GO:0016192	0.0185246	1.73225	259	205	15	12115	AN18G06440,AN01G12290,AN12G07570,AN01G12810,AN07G09160,AN15G00520,AN06G01810,AN14G00210,AN01G03350,AN15G01680,AN04G01530,AN07G02170,AN15G00540,AN04G05980,AN08G07470
GO:BP	intracellular transport	GO:0046907	0.0299098	1.52419	439	205	20	12115	AN01G11630,AN18G06440,AN01G12810,AN05G00140,AN15G00520,AN14G00210,AN16G07390,AN01G03350,AN15G01680,AN06G01360,AN04G01530,AN07G02170,AN04G04970,AN15G00540,AN04G05980,AN08G08980,AN07G04070,AN16G08830,AN17G02220,AN12G04710
GO:BP	protein targeting to ER	GO:0045047	0.0353576	1.45152	26	205	5	12115	AN01G11630,AN05G00140,AN16G07390,AN07G04070,AN16G08830
GO:BP	establishment of protein localization to endoplasmic reticulum	GO:0072599	0.0353576	1.45152	26	205	5	12115	AN01G11630,AN05G00140,AN16G07390,AN07G04070,AN16G08830
GO:CC	integral component of membrane	GO:0016021	1.03482e-136	135.985	2411	235	218	12884	AN15G03940,AN18G01000,AN07G05820,AN11G01260,AN02G01870,AN15G02040,AN12G07550,AN05G01070,AN13G02730,AN09G06200,AN08G00560,AN02G03540,AN09G04010,AN03G00640,AN11G04810,AN14G02090,AN10G00680,AN05G01290,AN06G02270,AN03G00230,AN16G05920,AN02G08020,AN09G02840,AN14G00950,AN05G01760,AN08G03680,AN06G01550,AN16G02000,AN04G10010,AN07G07670,AN19G00340,AN12G03760,AN02G08330,AN07G02820,AN16G09020,AN14G00970,AN1…
GO:CC	intrinsic component of membrane	GO:0031224	8.71867e-136	135.06	2434	235	218	12884	AN15G03940,AN18G01000,AN07G05820,AN11G01260,AN02G01870,AN15G02040,AN12G07550,AN05G01070,AN13G02730,AN09G06200,AN08G00560,AN02G03540,AN09G04010,AN03G00640,AN11G04810,AN14G02090,AN10G00680,AN05G01290,AN06G02270,AN03G00230,AN16G05920,AN02G08020,AN09G02840,AN14G00950,AN05G01760,AN08G03680,AN06G01550,AN16G02000,AN04G10010,AN07G07670,AN19G00340,AN12G03760,AN02G08330,AN07G02820,AN16G09020,AN14G00970,AN1…
GO:CC	membrane	GO:0016020	2.09351e-121	120.679	2873	235	219	12884	AN15G03940,AN18G01000,AN07G05820,AN11G01260,AN02G01870,AN15G02040,AN12G07550,AN05G01070,AN13G02730,AN09G06200,AN08G00560,AN02G03540,AN09G04010,AN03G00640,AN11G04810,AN14G02090,AN10G00680,AN05G01290,AN06G02270,AN03G00230,AN16G05920,AN02G08020,AN09G02840,AN14G00950,AN05G01760,AN08G03680,AN06G01550,AN16G02000,AN04G10010,AN07G07670,AN19G00340,AN12G03760,AN02G08330,AN07G02820,AN16G09020,AN14G00970,AN1…
GO:CC	cellular anatomical entity	GO:0110165	9.16749e-57	56.0377	6018	235	223	12884	AN15G03940,AN18G01000,AN07G05820,AN11G01260,AN02G01870,AN15G02040,AN12G07550,AN05G01070,AN13G02730,AN09G06200,AN08G00560,AN02G03540,AN09G04010,AN03G00640,AN11G04810,AN14G02090,AN10G00680,AN05G01290,AN06G02270,AN03G00230,AN16G05920,AN02G08020,AN09G02840,AN14G00950,AN05G01760,AN08G03680,AN06G01550,AN16G02000,AN04G10010,AN07G07670,AN19G00340,AN12G03760,AN02G08330,AN07G02820,AN16G09020,AN14G00970,AN1…
GO:CC	organelle membrane	GO:0031090	6.90941e-28	27.1606	694	235	66	12884	AN12G07550,AN08G00560,AN11G04810,AN10G00680,AN02G08020,AN09G02840,AN19G00340,AN01G09480,AN01G11630,AN01G12290,AN02G02190,AN07G03680,AN11G04370,AN12G07570,AN01G12810,AN05G00140,AN11G05260,AN18G03990,AN09G03990,AN01G03100,AN05G00200,AN17G02180,AN14G02010,AN15G00520,AN15G06310,AN15G06470,AN14G00210,AN15G05730,AN16G07390,AN01G03350,AN15G01680,AN12G03960,AN06G01360,AN08G04880,AN08G04480,AN16G07380,AN1…
GO:CC	endoplasmic reticulum	GO:0005783	1.81398e-24	23.7414	389	235	48	12884	AN08G00560,AN07G02820,AN01G09480,AN01G11630,AN18G06440,AN07G03680,AN11G04370,AN12G07570,AN01G12810,AN02G05890,AN05G00140,AN11G05260,AN17G02180,AN14G02010,AN15G06310,AN15G06470,AN14G00210,AN15G05730,AN16G07390,AN01G06380,AN01G03350,AN15G01680,AN12G03960,AN06G01360,AN08G04480,AN16G07380,AN18G03580,AN04G01530,AN07G02170,AN18G05180,AN11G01640,AN18G06470,AN04G01950,AN11G10950,AN12G04170,AN14G02990,AN0…
GO:CC	endoplasmic reticulum subcompartment	GO:0098827	1.87115e-19	18.7279	212	235	33	12884	AN08G00560,AN07G02820,AN01G09480,AN01G11630,AN07G03680,AN11G04370,AN01G12810,AN05G00140,AN11G05260,AN17G02180,AN15G06310,AN15G06470,AN14G00210,AN16G07390,AN01G03350,AN15G01680,AN12G03960,AN06G01360,AN08G04480,AN16G07380,AN18G03580,AN07G02170,AN18G05180,AN04G01950,AN14G02990,AN07G03740,AN11G09890,AN15G06925,AN18G04290,AN07G04070,AN13G00780,AN16G08830,AN18G06220
GO:CC	endoplasmic reticulum membrane	GO:0005789	1.00055e-18	17.9998	207	235	32	12884	AN08G00560,AN01G09480,AN01G11630,AN07G03680,AN11G04370,AN01G12810,AN05G00140,AN11G05260,AN17G02180,AN15G06310,AN15G06470,AN14G00210,AN16G07390,AN01G03350,AN15G01680,AN12G03960,AN06G01360,AN08G04480,AN16G07380,AN18G03580,AN07G02170,AN18G05180,AN04G01950,AN14G02990,AN07G03740,AN11G09890,AN15G06925,AN18G04290,AN07G04070,AN13G00780,AN16G08830,AN18G06220
GO:CC	endomembrane system	GO:0012505	2.86943e-18	17.5422	688	235	54	12884	AN08G00560,AN07G02820,AN01G09480,AN01G11630,AN18G06440,AN01G12290,AN07G03680,AN11G04370,AN12G07570,AN01G12810,AN02G05890,AN05G00140,AN11G05260,AN05G00200,AN17G02180,AN14G02010,AN15G00520,AN15G06310,AN15G06470,AN14G00210,AN15G05730,AN16G07390,AN01G06380,AN01G03350,AN15G01680,AN12G03960,AN06G01360,AN08G04480,AN16G07380,AN18G03580,AN04G01530,AN07G02170,AN18G05180,AN11G01640,AN18G06470,AN04G01950,AN1…
GO:CC	nuclear outer membrane-endoplasmic reticulum membrane network	GO:0042175	8.88971e-18	17.0511	222	235	32	12884	AN08G00560,AN01G09480,AN01G11630,AN07G03680,AN11G04370,AN01G12810,AN05G00140,AN11G05260,AN17G02180,AN15G06310,AN15G06470,AN14G00210,AN16G07390,AN01G03350,AN15G01680,AN12G03960,AN06G01360,AN08G04480,AN16G07380,AN18G03580,AN07G02170,AN18G05180,AN04G01950,AN14G02990,AN07G03740,AN11G09890,AN15G06925,AN18G04290,AN07G04070,AN13G00780,AN16G08830,AN18G06220
GO:CC	organelle subcompartment	GO:0031984	1.30239e-17	16.8853	242	235	33	12884	AN08G00560,AN07G02820,AN01G09480,AN01G11630,AN07G03680,AN11G04370,AN01G12810,AN05G00140,AN11G05260,AN17G02180,AN15G06310,AN15G06470,AN14G00210,AN16G07390,AN01G03350,AN15G01680,AN12G03960,AN06G01360,AN08G04480,AN16G07380,AN18G03580,AN07G02170,AN18G05180,AN04G01950,AN14G02990,AN07G03740,AN11G09890,AN15G06925,AN18G04290,AN07G04070,AN13G00780,AN16G08830,AN18G06220
GO:CC	bounding membrane of organelle	GO:0098588	1.02745e-15	14.9882	318	235	35	12884	AN10G00680,AN02G08020,AN09G02840,AN19G00340,AN01G09480,AN01G11630,AN01G12290,AN02G02190,AN07G03680,AN05G00140,AN18G03990,AN01G03100,AN05G00200,AN14G02010,AN15G00520,AN14G00210,AN15G05730,AN15G01680,AN06G01360,AN04G01530,AN07G02170,AN18G05180,AN11G01640,AN11G10950,AN15G00540,AN08G00210,AN14G04100,AN02G11700,AN04G07070,AN04G05980,AN08G08980,AN01G07860,AN16G08830,AN17G02220,AN12G04710
GO:CC	vacuolar membrane	GO:0005774	8.75228e-14	13.0579	139	235	23	12884	AN10G00680,AN02G08020,AN09G02840,AN19G00340,AN07G03680,AN18G03990,AN01G03100,AN05G00200,AN14G02010,AN15G00520,AN15G05730,AN06G01360,AN04G01530,AN18G05180,AN15G00540,AN14G04100,AN02G11700,AN04G07070,AN04G05980,AN08G08980,AN01G07860,AN17G02220,AN12G04710
GO:CC	vacuole	GO:0005773	1.22079e-13	12.9134	190	235	26	12884	AN10G00680,AN02G08020,AN09G02840,AN19G00340,AN08G02240,AN07G03680,AN18G03990,AN01G03100,AN05G00200,AN14G02010,AN15G00520,AN15G05730,AN06G01360,AN04G01530,AN18G05180,AN11G01640,AN15G00540,AN12G04170,AN14G04100,AN02G11700,AN04G07070,AN04G05980,AN08G08980,AN01G07860,AN17G02220,AN12G04710
GO:CC	intrinsic component of organelle membrane	GO:0031300	1.99724e-11	10.6996	127	235	20	12884	AN01G09480,AN01G12290,AN07G03680,AN05G00140,AN11G05260,AN14G00210,AN15G01680,AN08G04880,AN16G07380,AN18G05180,AN11G01640,AN04G01950,AN11G10950,AN14G02990,AN08G00210,AN04G05980,AN16G08580,AN07G03740,AN04G00170,AN12G04710
GO:CC	storage vacuole	GO:0000322	1.01107e-10	9.99522	155	235	21	12884	AN19G00340,AN08G02240,AN07G03680,AN18G03990,AN01G03100,AN05G00200,AN14G02010,AN15G00520,AN06G01360,AN04G01530,AN18G05180,AN11G01640,AN15G00540,AN12G04170,AN14G04100,AN02G11700,AN04G07070,AN04G05980,AN08G08980,AN01G07860,AN17G02220
GO:CC	fungal-type vacuole	GO:0000324	1.01107e-10	9.99522	155	235	21	12884	AN19G00340,AN08G02240,AN07G03680,AN18G03990,AN01G03100,AN05G00200,AN14G02010,AN15G00520,AN06G01360,AN04G01530,AN18G05180,AN11G01640,AN15G00540,AN12G04170,AN14G04100,AN02G11700,AN04G07070,AN04G05980,AN08G08980,AN01G07860,AN17G02220
GO:CC	lytic vacuole	GO:0000323	1.1497e-10	9.93942	156	235	21	12884	AN19G00340,AN08G02240,AN07G03680,AN18G03990,AN01G03100,AN05G00200,AN14G02010,AN15G00520,AN06G01360,AN04G01530,AN18G05180,AN11G01640,AN15G00540,AN12G04170,AN14G04100,AN02G11700,AN04G07070,AN04G05980,AN08G08980,AN01G07860,AN17G02220
GO:CC	integral component of organelle membrane	GO:0031301	1.25851e-09	8.90014	123	235	18	12884	AN01G09480,AN01G12290,AN07G03680,AN05G00140,AN11G05260,AN14G00210,AN15G01680,AN08G04880,AN16G07380,AN11G01640,AN04G01950,AN11G10950,AN14G02990,AN08G00210,AN04G05980,AN16G08580,AN07G03740,AN04G00170
GO:CC	fungal-type vacuole membrane	GO:0000329	2.06847e-08	7.68435	110	235	16	12884	AN07G03680,AN18G03990,AN01G03100,AN05G00200,AN14G02010,AN15G00520,AN06G01360,AN04G01530,AN18G05180,AN15G00540,AN14G04100,AN02G11700,AN04G07070,AN08G08980,AN01G07860,AN17G02220
GO:CC	lytic vacuole membrane	GO:0098852	2.37809e-08	7.62377	111	235	16	12884	AN07G03680,AN18G03990,AN01G03100,AN05G00200,AN14G02010,AN15G00520,AN06G01360,AN04G01530,AN18G05180,AN15G00540,AN14G04100,AN02G11700,AN04G07070,AN08G08980,AN01G07860,AN17G02220
GO:CC	intrinsic component of endoplasmic reticulum membrane	GO:0031227	4.51004e-05	4.34582	51	235	9	12884	AN01G09480,AN07G03680,AN05G00140,AN11G05260,AN16G07380,AN18G05180,AN04G01950,AN14G02990,AN07G03740
GO:CC	Golgi apparatus	GO:0005794	0.000169373	3.77116	231	235	17	12884	AN07G02820,AN18G06440,AN01G12290,AN07G03680,AN12G07570,AN02G05890,AN05G00200,AN15G00520,AN14G00210,AN15G01680,AN07G02170,AN18G05180,AN11G10950,AN15G00540,AN04G05980,AN08G08980,AN01G07860
GO:CC	cytoplasm	GO:0005737	0.000399084	3.39894	2817	235	82	12884	AN02G01870,AN12G07550,AN08G00560,AN11G04810,AN10G00680,AN02G08020,AN09G02840,AN06G01550,AN19G00340,AN07G02820,AN16G09020,AN01G09480,AN08G02240,AN01G11630,AN18G06440,AN01G12290,AN02G02190,AN07G03680,AN11G04370,AN12G07570,AN01G12810,AN02G05890,AN05G00140,AN11G05260,AN18G03990,AN09G03990,AN01G03100,AN05G00200,AN17G02180,AN14G02010,AN15G00520,AN15G06310,AN06G01810,AN15G06470,AN14G00210,AN15G05730,AN1…
GO:CC	integral component of endoplasmic reticulum membrane	GO:0030176	0.000454145	3.34281	50	235	8	12884	AN01G09480,AN07G03680,AN05G00140,AN11G05260,AN16G07380,AN04G01950,AN14G02990,AN07G03740
GO:CC	membrane protein complex	GO:0098796	0.00229705	2.63883	224	235	15	12884	AN10G00680,AN02G08020,AN06G01550,AN01G11630,AN05G00140,AN15G00520,AN15G05730,AN16G07390,AN16G07380,AN07G02170,AN04G04970,AN15G00540,AN04G05980,AN07G03740,AN16G08830
GO:CC	integral component of Golgi membrane	GO:0030173	0.00361142	2.44232	20	235	5	12884	AN01G12290,AN14G00210,AN15G01680,AN11G10950,AN04G05980
GO:CC	intrinsic component of Golgi membrane	GO:0031228	0.00361142	2.44232	20	235	5	12884	AN01G12290,AN14G00210,AN15G01680,AN11G10950,AN04G05980
GO:CC	plasma membrane	GO:0005886	0.012681	1.89685	290	235	16	12884	AN15G03940,AN02G03540,AN09G04010,AN05G01290,AN06G02270,AN06G01550,AN08G08890,AN10G00400,AN07G04430,AN18G03550,AN16G01600,AN11G01640,AN12G09270,AN02G00590,AN02G02810,AN14G04650
GO:CC	proton-transporting V-type ATPase, V0 domain	GO:0033179	0.0173279	1.76125	6	235	3	12884	AN10G00680,AN02G08020,AN15G05730
GO:CC	cytoplasmic vesicle	GO:0031410	0.0212039	1.67358	184	235	12	12884	AN18G06440,AN12G07570,AN05G00200,AN15G00520,AN06G01810,AN14G00210,AN15G01680,AN04G01530,AN07G02170,AN15G00540,AN04G06990,AN18G06220
GO:CC	intracellular vesicle	GO:0097708	0.0212039	1.67358	184	235	12	12884	AN18G06440,AN12G07570,AN05G00200,AN15G00520,AN06G01810,AN14G00210,AN15G01680,AN04G01530,AN07G02170,AN15G00540,AN04G06990,AN18G06220
GO:CC	vesicle	GO:0031982	0.022315	1.6514	185	235	12	12884	AN18G06440,AN12G07570,AN05G00200,AN15G00520,AN06G01810,AN14G00210,AN15G01680,AN04G01530,AN07G02170,AN15G00540,AN04G06990,AN18G06220
GO:CC	cell periphery	GO:0071944	0.0443941	1.35267	425	235	19	12884	AN15G03940,AN02G03540,AN09G04010,AN05G01290,AN06G02270,AN06G01550,AN07G02820,AN08G08890,AN10G00400,AN12G07570,AN07G04430,AN18G03550,AN08G04480,AN16G01600,AN11G01640,AN12G09270,AN02G00590,AN02G02810,AN14G04650
GO:CC	rough endoplasmic reticulum	GO:0005791	0.0472201	1.32587	8	235	3	12884	AN01G11630,AN05G00140,AN16G08830
GO:CC	rough endoplasmic reticulum membrane	GO:0030867	0.0472201	1.32587	8	235	3	12884	AN01G11630,AN05G00140,AN16G08830
GO:CC	Vps55/Vps68 complex	GO:0034424	0.049894	1.30195	2	235	2	12884	AN15G00520,AN15G00540
