# Supplementary material for: ERV14 receptor impacts mycelial growth via its interactions with cell wall synthase and transporters in Aspergillus niger
Source: Front Microbiol. 2023 Apr 11;14:1128462. doi: 10.3389/fmicb.2023.1128462 (PMC10126429; doi:10.3389/fmicb.2023.1128462)
Supplement: Supplementary file 4 [file Table_3.xlsx]

## Sheet: quant.raw
Accession	M_1	M_2	M_3	erv14_1	erv14_2	erv14_3	M_1_norm	M_2_norm	M_3_norm	erv14_1_norm	erv14_2_norm	erv14_3_norm
CAL00981	13290	9189	5373	10379	7117	4130	12684.8	8929.84	5550.27	10426.4	7111.12	4205.82
CAL00965	9305	10199	6834	3266	3337	4720	8881.24	9911.35	7059.48	3280.91	3334.24	4806.65
CAL00952	25382	23387	15686	16783	15740	12982	24226.1	22727.4	16203.5	16859.6	15727	13220.3
CAL00949	15518	23045	21410	5078	5077	12539	14811.3	22395	22116.4	5101.18	5072.81	12769.2
CAL00945	5717	4613	2789	3775	3267	2391	5456.64	4482.9	2881.02	3792.23	3264.3	2434.89
CAL00941	7181	6702	10040	8901	6727	7724	6853.97	6512.98	10371.3	8941.63	6721.44	7865.8
CAL00928	2290	2926	2364	612	647	1163	2185.71	2843.48	2442	614.793	646.466	1184.35
CAL00893	720	1212	707	1719	1252	2187	687.21	1177.82	730.326	1726.85	1250.97	2227.15
CAL00861	33219	46125	35496	4784	4478	3657	31706.2	44824.1	36667.1	4805.84	4474.3	3724.14
CAL00840	1026	904	1847	2419	5632	3380	979.274	878.504	1907.94	2430.04	5627.35	3442.05
CAL00825	114925	104865	129773	38996	46079	73976	109691	101907	134055	39174	46040.9	75334.1
CAL00819	36690	18810	37808	63326	71635	80427	35019.1	18279.5	39055.4	63615	71575.8	81903.5
CAL00776	6460	7422	2442	961	1078	2617	6165.8	7212.67	2522.57	965.386	1077.11	2665.04
CAL00744	15167	9123	10275	30864	28730	18696	14476.3	8865.7	10614	31004.9	28706.3	19039.2
CAL00741	2925	2987	3751	5380	3233	6832	2791.79	2902.76	3874.76	5404.56	3230.33	6957.42
CAL00735	46482	39389	34699	43146	31642	53146	44365.1	38278.1	35843.8	43342.9	31615.9	54121.7
CAL00733	55419	52385	45375	112610	82085	116391	52895.1	50907.5	46872.1	113124	82017.2	118528
CAL00712	303140	238952	359793	32051	24851	32106	289335	232213	371664	32197.3	24830.5	32695.4
CAL00703	768	417	2143	723	384	647	733.024	405.239	2213.7	726.3	383.683	658.878
CAL00702	10909	13127	6217	1784	1858	2880	10412.2	12756.8	6422.12	1792.14	1856.47	2932.87
CAL00701	24605	30529	28862	11178	16776	12462	23484.4	29668	29814.2	11229	16762.1	12690.8
CAL00692	17322	19909	12196	7232	9266	7557	16533.1	19347.5	12598.4	7265.01	9258.35	7695.73
CAL00689	181175	190015	299238	96446	71722	96510	172924	184656	309111	96886.2	71662.8	98281.7
CAL00682	23377	24918	14776	46189	22103	34958	22312.4	24215.2	15263.5	46399.8	22084.7	35599.8
CAL00664	69573	96127	842	50692	80829	48010	66404.5	93415.9	869.78	50923.4	80762.2	48891.4
CAL00644	29410	23784	11653	26399	28081	16439	28070.6	23113.2	12037.5	26519.5	28057.8	16740.8
CAL00629	36419	47615	54427	12057	10538	17382	34760.4	46272.1	56222.7	12112	10529.3	17701.1
CAL00626	3000	6847	2627	5285	6564	3497	2863.38	6653.89	2713.67	5309.12	6558.58	3561.2
CAL00615	22560	22723	27116	24880	18332	4505	21532.6	22082.1	28010.6	24993.6	18316.9	4587.7
CAL00586	7270	5984	4398	3220	2787	2542	6938.91	5815.23	4543.1	3234.7	2784.7	2588.67
CAL00576	4673	7871	3972	1291	5480	935	4460.18	7649.01	4103.05	1296.89	5475.47	952.165
CAL00561	16311	17163	7233	5445	5255	5787	15568.2	16678.9	7471.64	5469.85	5250.66	5893.24
CAL00557	16258	13544	2655	9037	9540	9387	15517.6	13162	2742.6	9078.25	9532.12	9559.33
CAL00552	6233	2930	3851	14629	19128	6973	5949.14	2847.36	3978.06	14695.8	19112.2	7101.01
CAL00533	13728	9911	6203	15086	16619	6762	13102.8	9631.47	6407.66	15154.9	16605.3	6886.14
CAL00530	6605	7283	2640	15227	13059	15121	6304.2	7077.59	2727.1	15296.5	13048.2	15398.6
CAL00525	7664	7334	6463	7175	7127	9600	7314.97	7127.15	6676.23	7207.75	7121.11	9776.24
CAL00512	38516	26945	26322	49543	77436	36751	36761.9	26185.1	27190.4	49769.1	77372	37425.7
CAL00511	5132	7076	5432	5159	4091	3055	4898.28	6876.43	5611.22	5182.55	4087.62	3111.08
CAL00382	4461	3358	4920	2498	2655	2662	4257.84	3263.29	5082.33	2509.4	2652.81	2710.87
CAL00367	4741	5434	5441	3200	3811	4025	4525.09	5280.74	5620.52	3214.61	3807.85	4098.89
CAL00330	6716	9143	11205	5356	6883	9302	6410.14	8885.13	11574.7	5380.45	6877.31	9472.77
CAL00327	193285	244243	423906	167352	122723	247923	184482	237354	437892	168116	122622	252474
CAL00310	12299	8204	7232	8132	5919	7290	11738.9	7972.62	7470.61	8169.12	5914.11	7423.83
CAL00307	2896	5283	4876	3549	4557	3148	2764.11	5134	5036.87	3565.2	4553.24	3205.79
CAL00278	30763	26231	22800	18540	23589	19188	29362	25491.2	23552.2	18624.6	23569.5	19540.3
CAL00251	7567	5863	4953	5205	4925	5427	7222.39	5697.64	5116.42	5228.76	4920.93	5526.63
CAL00242	9960	6458	12193	23732	16495	11830	9506.41	6275.86	12595.3	23840.3	16481.4	12047.2
CAL00221	19726	25056	34872	3753	4333	5892	18827.6	24349.3	36022.5	3770.13	4329.42	6000.17
CAL00216	58545	56803	37605	32600	39890	26771	55878.8	55200.9	38845.7	32748.8	39857.1	27262.5
CAL00215	7322	7711	8887	7954	7278	6857	6988.54	7493.52	9180.21	7990.3	7271.99	6982.88
CAL00214	13052	11405	10175	17521	19432	13581	12457.6	11083.3	10510.7	17601	19415.9	13830.3
CAK97510	33519	34308	25452	5791	7041	11249	31992.5	33340.4	26291.7	5817.43	7035.18	11455.5
CAK97501	159393	116500	118554	240509	256176	329933	152134	113214	122465	241607	255964	335990
CAK97468	9336	11352	17684	17122	66809	327018	8910.82	11031.8	18267.5	17200.1	66753.8	333021
CAK97437	39867	35219	41907	15876	25094	9074	38051.4	34225.7	43289.6	15948.5	25073.3	9240.58
CAK97435	551971	634479	358105	114576	116068	499269	526833	616584	369920	115099	115972	508435
CAK97433	6975	6297	6021	5437	5007	4500	6657.35	6119.4	6219.65	5461.82	5002.86	4582.61
CAK97416	13330	13796	9543	52135	35949	46073	12722.9	13406.9	9857.85	52373	35919.3	46918.8
CAK97392	22483	15254	24825	19892	21905	23352	21459.1	14823.8	25644.1	19982.8	21886.9	23780.7
CAK97318	10601	14219	15590	16998	21910	13831	10118.2	13818	16104.4	17075.6	21891.9	14084.9
CAK97274	3421	3021	1115	1423	1443	1047	3265.2	2935.8	1151.79	1429.49	1441.81	1066.22
CAK97267	137	323	2171	364	472	677	130.761	313.89	2242.63	365.661	471.61	689.428
CAK97262	21214	19939	10086	3534	4035	2587	20247.9	19376.6	10418.8	3550.13	4031.67	2634.49
CAK97260	3425	3242	2460	9804	5784	5967	3269.02	3150.56	2541.16	9848.75	5779.22	6076.54
CAK97259	36417	49991	46728	34649	24788	27997	34758.5	48581.1	48269.7	34807.1	24767.5	28511
CAK97205	2870	2419	2191	1864	1651	1805	2739.3	2350.78	2263.29	1872.51	1649.64	1838.14
CAK97166	123119	93140	102647	814471	553053	420790	117512	90513.1	106034	818188	552596	428515
CAK97162	29073	26341	21033	36887	27040	28363	27749	25598.1	21726.9	37055.4	27017.7	28883.7
CAK97150	5172	6628	5885	2572	1820	2758	4936.46	6441.07	6079.16	2583.74	1818.5	2808.63
CAK97140	15537	17220	12605	16702	16509	20219	14829.4	16734.3	13020.9	16778.2	16495.4	20590.2
CAK97137	1360	2472	1659	3511	2128	1898	1298.06	2402.28	1713.74	3527.03	2126.24	1932.84
CAK97116	15280	14180	14132	8954	9580	7303	14584.1	13780.1	14598.3	8994.87	9572.09	7437.07
CAK97109	2878	3610	5315	3297	2528	2622	2746.93	3508.18	5490.36	3312.05	2525.91	2670.13
CAK97094	2024	2190	1271	6648	11293	3730	1931.82	2128.23	1312.93	6678.34	11283.7	3798.48
CAK97083	15657	10571	9217	25379	22123	14747	14944	10272.9	9521.1	25494.8	22104.7	15017.7
CAK97073	43236	50381	25130	14374	12379	16005	41267	48960.1	25959.1	14439.6	12368.8	16298.8
CAK97072	7145	12859	5229	17330	32495	22542	6819.61	12496.3	5401.52	17409.1	32468.2	22955.8
CAK97071	4299	3035	2411	4294	4934	5117	4103.22	2949.4	2490.55	4313.6	4929.92	5210.94
CAK97054	10428	9572	7703	5252	4087	4121	9953.09	9302.03	7957.15	5275.97	4083.62	4196.65
CAK97035	1933	1681	1568	2370	1847	1541	1844.97	1633.59	1619.73	2380.82	1845.47	1569.29
CAK97025	55097	40844	48754	22753	14713	19585	52587.8	39692	50362.5	22856.9	14700.8	19944.5
CAK96983	6549	8399	4959	3729	4070	4277	6250.75	8162.12	5122.61	3746.02	4066.64	4355.52
CAK96974	4779	2631	2660	6601	3552	8422	4561.36	2556.8	2747.76	6631.13	3549.07	8576.61
CAK96908	14100	12840	17060	26546	25050	11090	13457.9	12477.9	17622.9	26667.2	25029.3	11293.6
CAK96905	7317	8465	5660	5702	7608	7042	6983.77	8226.26	5846.74	5728.03	7601.72	7171.28
CAK96890	2869	2398	1554	319	478	405	2738.34	2330.37	1605.27	320.456	477.605	412.435
CAK96847	1728	1896	956	2718	1575	1099	1649.3	1842.53	987.541	2730.41	1573.7	1119.18
CAK96843	46544	50664	25719	12025	13175	15480	44424.3	49235.1	26567.6	12079.9	13164.1	15764.2
CAK96841	358314	267176	124298	392203	407151	338098	341996	259641	128399	393993	406815	344305
CAK96818	1213	2238	1546	1343	1038	1714	1157.76	2174.88	1597.01	1349.13	1037.14	1745.47
CAK96806	1815	3193	874	1936	984	3136	1732.34	3102.95	902.836	1944.84	983.187	3193.57
CAK96739	24214	27177	32552	7452	9701	12388	23111.3	26410.5	33626	7486.01	9692.99	12615.4
CAK96677	15398	11720	10749	23671	15908	31197	14696.8	11389.5	11103.6	23779	15894.9	31769.7
CAK96668	3769	2828	3032	5190	4770	4335	3597.35	2748.24	3132.04	5213.69	4766.06	4414.58
CAK96641	6177	7711	4355	5789	13822	6918	5895.69	7493.52	4498.69	5815.42	13810.6	7045
CAK96620	1266	3705	2246	6904	8359	2806	1208.34	3600.51	2320.1	6935.51	8352.1	2857.51
CAK96512	6532	8664	8111	2091	2099	2293	6234.52	8419.64	8378.61	2100.54	2097.27	2335.1
CAK96511	4031	3950	1596	4530	3548	4421	3847.42	3838.6	1648.66	4550.68	3545.07	4502.16
CAK96510	5250	4757	4672	2842	1297	2411	5010.91	4622.83	4826.14	2854.97	1295.93	2455.26
CAK96474	87218	60455	49757	57430	91147	50305	83246	58749.9	51398.6	57692.1	91071.7	51228.5
CAK96455	2661	4216	1275	5304	3489	5326	2539.81	4097.09	1317.07	5328.21	3486.12	5423.78
CAK96454	7485	8412	8486	5882	5359	4157	7144.12	8174.75	8765.98	5908.85	5354.57	4233.31
CAK96432	3386	2779	1595	2514	1825	753	3231.8	2700.62	1647.62	2525.47	1823.49	766.824
CAK96428	18879	10232	13942	20902	11949	19110	18019.2	9943.42	14402	20997.4	11939.1	19460.8
CAK96424	2760	983	2355	6359	4206	6355	2634.31	955.276	2432.7	6388.02	4202.53	6471.67
CAK96410	57599	71673	55831	28423	34848	29885	54975.8	69651.6	57673	28552.7	34819.2	30433.6
CAK96408	35256	38816	30118	23983	25938	26554	33650.4	37721.2	31111.7	24092.5	25916.6	27041.5
CAK96400	5129	4088	4800	2322	2957	2719	4895.42	3972.7	4958.37	2332.6	2954.56	2768.92
CAK96393	21263	16659	18039	67964	48878	50241	20294.6	16189.2	18634.2	68274.2	48837.6	51163.3
CAK96381	10293	11148	8625	7580	7422	7065	9824.24	10833.6	8909.57	7614.6	7415.87	7194.7
CAK96374	1726	1973	1151	1929	1492	2194	1647.4	1917.35	1188.98	1937.8	1490.77	2234.28
CAK96369	3027	6435	6642	1326	1102	3383	2889.15	6253.51	6861.14	1332.05	1101.09	3445.11
CAK96368	45381	42524	23604	26821	20140	28710	43314.3	41324.7	24382.8	26943.4	20123.4	29237.1
CAK96344	6960	6901	5242	5755	7672	5086	6643.03	6706.37	5414.95	5781.27	7665.66	5179.37
CAK96334	22402	27572	38281	1625	2682	585	21381.8	26794.4	39544	1632.42	2679.78	595.739
CAK96326	18877	12330	9827	28351	42290	25141	18017.3	11982.2	10151.2	28480.4	42255.1	25602.5
CAK96192	47747	56134	74415	20663	25490	24573	45572.5	54550.8	76870.2	20757.3	25468.9	25024.1
CAK96175	198732	114484	126235	421950	221367	139358	189681	111255	130400	423876	221184	141916
CAK49183	20048	19353	10745	3143	2490	1970	19135	18807.2	11099.5	3157.35	2487.94	2006.17
CAK49169	2759	3302	3111	1831	2158	1810	2633.35	3208.87	3213.64	1839.36	2156.22	1843.23
CAK49130	1790000	2009999	2540000	454141	296303	330368	1.70848e+06	1.95331e+06	2.6238e+06	456214	296058	336433
CAK49116	276	1028	1151	1043	1658	505	263.431	999.007	1188.98	1047.76	1656.63	514.271
CAK49003	128320	142348	80896	125339	192662	130411	122476	138333	83565	125911	192503	132805
CAK48989	49490	54333	48089	6219	3997	6642	47236.1	52800.6	49675.6	6247.38	3993.7	6763.93
CAK48984	4089	3535	4440	2726	5259	3787	3902.78	3435.3	4586.49	2738.44	5254.66	3856.52
CAK48953	48718	46194	34037	11072	13216	12199	46499.3	44891.2	35160	11122.5	13205.1	12423
CAK48900	13523	10152	28946	23950	11276	14158	12907.1	9865.68	29901	24059.3	11266.7	14417.9
CAK48885	97465	88659	79263	93203	75947	117968	93026.3	86158.5	81878.1	93628.4	75884.3	120134
CAK48875	11910	12135	13240	10696	10117	16478	11367.6	11792.7	13676.8	10744.8	10108.6	16780.5
CAK48859	43969	42394	37266	11686	13885	22696	41966.6	41198.3	38495.5	11739.3	13873.5	23112.7
CAK48829	3420	2761	595	3756	2856	2816	3264.25	2683.13	614.631	3773.14	2853.64	2867.7
CAK48802	18411	15923	11732	8479	9361	7075	17572.5	15473.9	12119.1	8517.7	9353.27	7204.88
CAK48735	32520	29963	33006	27874	16660	6725	31039	29117.9	34095	28001.2	16646.2	6848.46
CAK48732	5078	4314	7888	6352	7923	4791	4846.74	4192.33	8148.25	6380.99	7916.46	4878.95
CAK48712	19662	9881	10099	11467	10350	5084	18766.6	9602.32	10432.2	11519.3	10341.5	5177.33
CAK48657	15424	15509	7571	11096	9920	8554	14721.6	15071.6	7820.79	11146.6	9911.81	8711.04
CAK48653	24809	36556	23139	13200	14015	16082	23679.2	35525	23902.4	13260.2	14003.4	16377.2
CAK48651	25514	24294	19456	13528	9675	22003	24352.1	23608.8	20097.9	13589.7	9667.01	22406.9
CAK48602	8580	16002	7591	12369	16011	16171	8189.25	15550.7	7841.45	12425.5	15997.8	16467.9
CAK48594	6961	6590	8886	2158	1299	1741	6643.98	6404.14	9179.18	2167.85	1297.93	1772.96
CAK48570	3415	2275	2106	1379	1388	1413	3259.48	2210.84	2175.48	1385.29	1386.85	1438.94
CAK48522	4085	2675	1821	2536	4076	4569	3898.96	2599.55	1881.08	2547.57	4072.63	4652.88
CAK48471	65449	56183	45205	31012	25229	22526	62468.3	54598.4	46696.5	31153.5	25208.2	22939.5
CAK48447	3307	3692	6457	2238	2086	1754	3156.39	3587.87	6670.04	2248.21	2084.28	1786.2
CAK48429	13178	12299	12586	2223	2980	2171	12577.9	11952.1	13001.3	2233.15	2977.54	2210.86
CAK48420	12890	15097	10336	3865	3574	4944	12303	14671.2	10677	3882.64	3571.05	5034.76
CAK48400	102225	95613	99766	125852	87468	79612	97569.5	92916.4	103058	126426	87395.8	81073.5
CAK48309	47649	60803	39291	29314	25437	31951	45479	59088.1	40587.3	29447.8	25416	32537.6
CAK48210	4963	4576	4009	3433	3166	3425	4736.98	4446.94	4141.27	3448.67	3163.38	3487.88
CAK48170	4857	4029	4097	2718	3021	3504	4635.8	3915.37	4232.17	2730.41	3018.5	3568.33
CAK48169	111190	70388	106526	152363	113632	223739	106126	68402.8	110041	153058	113538	227846
CAK48168	116246	98128	86674	396449	263830	393719	110952	95360.4	89533.6	398258	263612	400947
CAK48157	3628	5129	2755	7682	6678	6183	3462.78	4984.34	2845.9	7717.06	6672.48	6296.51
CAK48151	5001	6157	5518	8587	7548	7041	4773.25	5983.35	5700.06	8626.19	7541.77	7170.26
CAK48142	140675	162459	98500	71216	62848	93856	134268	157877	101750	71541	62796.1	95579
CAK48124	76965	58313	60077	103719	82208	146587	73459.9	56668.4	62059.1	104192	82140.1	149278
CAK48119	16351	7364	11581	24759	25074	6086	15606.3	7156.31	11963.1	24872	25053.3	6197.73
CAK48110	7035	8054	6867	4351	4187	5089	6714.61	7826.85	7093.56	4370.86	4183.54	5182.42
CAK48103	1413	1901	1285	2035	1003	653	1348.65	1847.38	1327.4	2044.29	1002.17	664.988
CAK48097	23084	26856	15859	43751	27115	57277	22032.7	26098.6	16382.2	43950.7	27092.6	58328.5
CAK47999	35497	44090	34686	16302	10193	23162	33880.4	42846.5	35830.4	16376.4	10184.6	23587.2
CAK47995	13819	13931	17873	14598	10710	15586	13189.7	13538.1	18462.7	14664.6	10701.2	15872.1
CAK47994	858	934	752	106	192	360	818.925	907.658	776.811	106.484	191.841	366.609
CAK47942	110354	85293	215997	236040	117070	185710	105328	82887.4	223123	237117	116973	189119
CAK47923	10552	11493	7964	15187	10188	9206	10071.4	11168.9	8226.76	15256.3	10179.6	9375
CAK47919	359577	324476	274006	318579	467752	369213	343201	315325	283046	320033	467366	375991
CAK47915	28089	24598	40038	23695	13734	14100	26809.8	23904.2	41359	23803.1	13722.7	14358.8
CAK47880	5110	5023	4108	2523	2052	2315	4877.28	4881.33	4243.54	2534.52	2050.31	2357.5
CAK47873	189793	169267	76637	92498	74897	64625	181150	164493	79165.5	92920.2	74835.1	65811.4
CAK47845	48303	59340	37902	17080	17710	25301	46103.2	57666.4	39152.5	17158	17695.4	25765.5
CAK47832	702	1137	869	1738	1283	1729	670.03	1104.93	897.671	1745.93	1281.94	1760.74
CAK47816	39501	49884	33085	24027	22777	30601	37702.1	48477.1	34176.6	24136.7	22758.2	31162.8
CAK47797	33022	28671	20432	20885	23174	24881	31518.1	27862.4	21106.1	20980.3	23154.9	25337.8
CAK47790	14110	10892	8354	24229	16729	22060	13467.4	10584.8	8629.62	24339.6	16715.2	22465
CAK47789	21275	17797	16397	10466	10021	16018	20306.1	17295.1	16938	10513.8	10012.7	16312.1
CAK47777	71046	57279	39971	85018	92476	55794	67810.5	55663.5	41289.8	85406	92399.6	56818.3
CAK47759	6829	7916	2193	1111	986	831	6518	7692.74	2265.35	1116.07	985.186	846.256
CAK47758	6991	7461	6713	2971	2385	1918	6672.62	7250.57	6934.48	2984.56	2383.03	1953.21
CAK47749	27250	29136	23540	53891	41458	60836	26009	28314.3	24316.7	54137	41423.8	61952.8
CAK47738	31265	22557	20541	26173	35787	11053	29841.1	21920.8	21218.7	26292.5	35757.4	11255.9
CAK47729	22810	28724	19310	5635	6036	7559	21771.2	27913.9	19947.1	5660.72	6031.01	7697.77
CAK47691	1707	2090	823	497	737	950	1629.26	2031.05	850.153	499.268	736.391	967.44
CAK47637	61891	52284	64380	69527	70424	73594	59072.4	50809.4	66504.1	69844.3	70365.8	74945
CAK47634	63105	60291	24006	8101	7658	7509	60231.1	58590.6	24798	8137.97	7651.67	7646.85
CAK47618	191209	92057	177529	200643	210839	131886	182501	89460.6	183386	201559	210665	134307
CAK47609	3148	2506	1713	4852	4465	5089	3004.64	2435.32	1769.52	4874.15	4461.31	5182.42
CAK47584	10438	8703	9038	19332	15868	12261	9962.64	8457.54	9336.19	19420.2	15854.9	12486.1
CAK47582	8293	9032	4276	5943	2909	5880	7915.32	8777.26	4417.08	5970.13	2906.6	5987.95
CAK47567	49222	41163	40145	41679	44012	33215	46980.4	40002	41469.5	41869.2	43975.6	33824.8
CAK47359	5595	6359	4961	4915	6850	4676	5340.19	6179.65	5124.68	4937.43	6844.34	4761.84
CAK47358	4957	6576	5398	1735	1996	1943	4731.25	6390.53	5576.1	1742.92	1994.35	1978.67
CAK47356	1193	1583	817	548	337	693	1138.67	1538.35	843.955	550.501	336.722	705.722
CAK47351	3258	2849	3799	1952	2127	3381	3109.63	2768.65	3924.34	1960.91	2125.24	3443.07
CAK47317	15288	15577	11769	37381	28359	25417	14591.8	15137.7	12157.3	37551.6	28335.6	25883.6
CAK47315	37165	45064	21267	51065	75079	47803	35472.4	43793	21968.7	51298.1	75017	48680.6
CAK47312	45523	60893	43523	27791	31116	19509	43449.8	59175.6	44959	27917.8	31090.3	19867.1
CAK47289	31827	30420	40674	33655	22953	17164	30377.5	29562	42016	33808.6	22934	17479.1
CAK47240	2887	2294	2686	2580	2212	3185	2755.52	2229.3	2774.62	2591.78	2210.17	3243.47
CAK47209	12414	21050	17274	12502	18156	14785	11848.6	20456.3	17843.9	12559.1	18141	15056.4
CAK47177	9799	9933	6923	23211	12140	15997	9352.74	9652.85	7151.41	23316.9	12130	16290.7
CAK47145	2769	4028	1259	6694	11991	1460	2642.9	3914.4	1300.54	6724.55	11981.1	1486.8
CAK47098	1498	2593	2453	2500	1234	1274	1429.78	2519.87	2533.93	2511.41	1232.98	1297.39
CAK47080	48692	44449	35819	27909	21760	22288	46474.5	43195.4	37000.8	28036.4	21742	22697.2
CAK47046	8852	8783	4537	17966	11580	18112	8448.87	8535.29	4686.69	18048	11570.4	18444.5
CAK47045	3341	4185	3379	1286	1519	795	3188.85	4066.97	3490.48	1291.87	1517.75	809.595
CAK46973	3422	4083	3175	997	1166	1464	3266.16	3967.84	3279.75	1001.55	1165.04	1490.88
CAK46969	21427	21746	23809	28163	24402	34535	20451.2	21132.7	24594.5	28291.5	24381.8	35169
CAK46937	34141	40257	20565	30229	37232	26873	32586.2	39121.6	21243.5	30367	37201.2	27366.3
CAK46934	2945	4303	794	5910	5527	4683	2810.88	4181.64	820.197	5936.97	5522.43	4768.97
CAK46932	8512	10687	10916	9130	9445	16285	8124.35	10385.6	11276.2	9171.67	9437.2	16584
CAK46931	26133	35110	29216	23293	26471	23295	24942.9	34119.8	30179.9	23399.3	26449.1	23722.7
CAK46872	3185	3029	833	1735	1439	2605	3039.95	2943.57	860.483	1742.92	1437.81	2652.82
CAK46860	267536	192264	172814	88345	49836	53670	255352	186841	178516	88748.2	49794.8	54655.3
CAK46852	23962	20995	31250	7596	5255	8350	22870.7	20402.9	32281	7630.67	5250.66	8503.29
CAK46827	7188	6604	8413	12528	12390	10740	6860.65	6417.74	8690.57	12585.2	12379.8	10937.2
CAK46816	5162	5795	2239	4342	3106	5329	4926.91	5631.56	2312.87	4361.82	3103.43	5426.83
CAK46736	38068	25094	32298	34602	26171	19230	36334.3	24386.3	33363.6	34759.9	26149.4	19583
CAK46708	6397	7038	9038	10676	8638	5603	6105.67	6839.5	9336.19	10724.7	8630.87	5705.86
CAK46680	6776	7581	7913	3610	4068	3321	6467.41	7367.19	8174.07	3626.48	4064.64	3381.97
CAK46676	20468	22173	14691	8641	8300	14578	19535.9	21547.6	15175.7	8680.44	8293.14	14845.6
CAK46665	4357	3832	1312	2470	2199	1241	4158.58	3723.92	1355.29	2481.27	2197.18	1263.78
CAK46657	4381	4015	3357	3162	4023	2659	4181.48	3901.76	3467.76	3176.43	4019.68	2707.81
CAK46654	4370	3530	3368	3164	3109	3061	4170.98	3430.44	3479.12	3178.44	3106.43	3117.19
CAK46650	14418	12423	23573	3715	2964	5001	13761.4	12072.6	24350.7	3731.96	2961.55	5092.81
CAK46645	16814	15418	18947	15077	11918	16456	16048.3	14983.2	19572.1	15145.8	11908.2	16758.1
CAK46627	46027	43246	38980	63636	48502	71747	43930.9	42026.3	40266.1	63926.4	48461.9	73064.1
CAK46618	11483	12495	9954	3539	5213	3752	10960	12142.6	10282.4	3555.15	5208.69	3820.88
CAK46603	30599	37948	18248	22914	17538	34179	29205.5	36877.7	18850.1	23018.6	17523.5	34806.5
CAK46595	2797	4346	1723	1657	1284	1072	2669.62	4223.43	1779.85	1664.56	1282.94	1091.68
CAK46589	50672	60965	76003	17026	16555	17385	48364.3	59245.6	78510.6	17103.7	16541.3	17704.2
CAK46579	5581	7520	2713	2277	2222	2762	5326.83	7307.91	2802.51	2287.39	2220.16	2812.71
CAK46573	9435	7654	5579	7543	7224	8329	9005.32	7438.13	5763.07	7577.43	7218.03	8481.9
CAK46566	11708	9131	8622	3135	2732	4033	11174.8	8873.47	8906.47	3149.31	2729.74	4107.04
CAK46547	1220	1651	1099	448	365	883	1164.44	1604.44	1135.26	450.045	364.699	899.21
CAK46545	284209	155495	150788	307056	350154	197372	271266	151109	155763	308457	349865	200995
CAK46542	13214	14447	9551	9035	9310	9662	12612.2	14039.5	9866.12	9076.24	9302.31	9839.38
CAK46541	13395	14058	13682	16276	12155	11169	12785	13661.5	14133.4	16350.3	12145	11374
CAK46539	7942	8594	6237	1804	1123	3689	7580.31	8351.62	6442.78	1812.23	1122.07	3756.72
CAK46536	73987	51138	43998	29761	22315	18031	70617.5	49695.7	45449.6	29896.8	22296.6	18362
CAK46484	3531	1233	1998	4355	2617	2100	3370.19	1198.22	2063.92	4374.88	2614.84	2138.55
CAK46433	6549	7033	5473	49436	45420	31997	6250.75	6834.64	5653.57	49661.6	45382.5	32584.4
CAK46412	48017	45598	32756	20807	19321	22484	45830.2	44312	33836.7	20902	19305	22896.8
CAK46407	10467	11804	4987	3789	4763	4029	9990.32	11471.1	5151.54	3806.29	4759.07	4102.96
CAK46381	55856	49514	56038	29593	31227	7733	53312.2	48117.5	57886.9	29728.1	31201.2	7874.96
CAK46379	22177	23106	21794	50648	34232	40115	21167	22454.3	22513.1	50879.2	34203.7	40851.4
CAK46375	90201	88993	72439	77531	93090	49896	86093.1	86483.1	74829	77884.9	93013.1	50812
CAK46331	35674	32821	35401	20296	19325	14915	34049.3	31895.3	36569	20388.6	19309	15188.8
CAK46307	1642	1252	1547	1269	1611	1381	1567.22	1216.69	1598.04	1274.79	1609.67	1406.35
CAK46283	12714	13789	12566	2356	2325	3496	12135	13400.1	12980.6	2366.75	2323.08	3560.18
CAK46213	808	1301	1043	3490	3809	2903	771.202	1264.31	1077.41	3505.93	3805.85	2956.29
CAK46187	17130	15483	11902	11467	13561	14372	16349.9	15046.3	12294.7	11519.3	13549.8	14635.8
CAK46181	201924	233810	215638	177791	173643	83166	192728	227216	222753	178602	173500	84692.8
CAK46177	661	804	1706	1445	1100	2874	630.897	781.324	1762.29	1451.6	1099.09	2926.76
CAK46170	3292	4158	1882	1155	297	579	3142.08	4040.73	1944.09	1160.27	296.755	589.629
CAK46166	47188	40747	43035	26234	25565	36006	45039	39597.8	44454.9	26353.7	25543.9	36667
CAK46147	5701	8381	8581	9962	8506	5396	5441.37	8144.62	8864.11	10007.5	8498.97	5495.06
CAK46129	1522	1796	2124	683	1069	1312	1452.69	1745.35	2194.08	686.117	1068.12	1336.09
CAK46088	66764	89159	57916	7643	8164	13307	63723.5	86644.4	59826.8	7677.88	8157.26	13551.3
CAK46062	8570	5060	5474	6751	6561	3337	8179.71	4917.29	5654.6	6781.81	6555.58	3398.26
CAK46051	14381	6929	6046	20083	8618	38304	13726.1	6733.58	6245.48	20174.7	8610.88	39007.2
CAK45972	4737	4241	2052	640	1210	551	4521.27	4121.39	2119.7	642.921	1209	561.115
CAK45960	5651	7139	8059	2129	1875	2230	5393.64	6937.65	8324.89	2138.72	1873.45	2270.94
CAK45898	6831	2966	5114	6056	4742	6177	6519.91	2882.35	5282.73	6083.64	4738.08	6290.4
CAK45885	16686	20423	12380	16707	14967	11682	15926.1	19847	12788.5	16783.3	14954.6	11896.5
CAK45863	7038	8652	4637	1931	1629	1382	6717.48	8407.98	4789.99	1939.81	1627.65	1407.37
CAK45861	4368	5437	10338	959	915	1628	4169.07	5283.66	10679.1	963.377	914.244	1657.89
CAK45855	5575	6215	4344	8133	8023	5447	5321.11	6039.71	4487.32	8170.12	8016.37	5547
CAK45835	1796	1163	810	1504	1706	2718	1714.21	1130.2	836.724	1510.86	1704.59	2767.9
CAK45793	2496	3310	1717	6105	7913	4077	2382.33	3216.65	1773.65	6132.86	7906.46	4151.85
CAK45733	14517	15631	12242	9752	11305	10917	13855.9	15190.1	12645.9	9796.51	11295.7	11117.4
CAK45713	5110	5832	5124	3102	3764	2139	4877.28	5667.52	5293.06	3116.16	3760.89	2178.27
CAK45697	21347	17266	9702	6377	6434	7586	20374.8	16779	10022.1	6406.11	6428.69	7725.26
CAK45592	261836	299107	227788	193921	250514	92271	249912	290671	235303	194806	250307	93964.9
CAK45519	12175	10240	8687	8835	10296	6365	11620.5	9951.19	8973.61	8875.33	10287.5	6481.85
CAK45492	13045	9760	5256	21212	24394	23763	12450.9	9484.73	5429.41	21308.8	24373.9	24199.2
CAK45488	8296	4800	7859	35862	36137	38190	7918.19	4664.62	8118.29	36025.7	36107.2	38891.1
CAK45461	166808	149609	170978	294233	322829	315260	159211	145389	176619	295576	322562	321048
CAK45423	10342	11665	6563	4375	2607	14307	9871.01	11336	6779.53	4394.97	2604.85	14569.6
CAK45421	84129	82506	70726	44000	41454	48699	80297.6	80179	73059.5	44200.8	41419.8	49593
CAK45418	12011	10335	11447	15215	9719	18219	11464	10043.5	11824.7	15284.4	9710.97	18553.5
CAK45405	28214	28531	23732	48604	27476	18617	26929.1	27726.3	24515	48825.8	27453.3	18958.8
CAK45401	13888	15272	8035	2011	2446	3466	13255.5	14841.3	8300.1	2020.18	2443.98	3529.63
CAK45386	11102	7907	7657	12789	6378	5429	10596.4	7683.99	7909.63	12847.4	6372.73	5528.67
CAK45346	8408	9129	6540	5442	5729	6434	8025.09	8871.53	6755.78	5466.84	5724.27	6552.12
CAK45282	14098	12240	17984	19628	16319	11818	13456	11894.8	18577.3	19717.6	16305.5	12035
CAK45270	1634	2156	889	1085	2188	997	1559.59	2095.19	918.331	1089.95	2186.19	1015.3
CAK45219	4759	5523	2185	7022	5757	4378	4542.27	5367.23	2257.09	7054.05	5752.24	4458.37
CAK45214	2095	2618	1730	2170	2035	2029	1999.59	2544.16	1787.08	2179.9	2033.32	2066.25
CAK45195	8478	9611	8124	8174	6165	6095	8091.9	9339.93	8392.04	8211.31	6159.91	6206.89
CAK45172	38699	32952	33565	60787	46086	25424	36936.6	32022.6	34672.4	61064.4	46047.9	25890.7
CAK45164	85791	88290	47423	49012	36563	57901	81883.9	85799.9	48987.6	49235.7	36532.8	58964
CAK45125	6827	6045	8313	20080	14501	8437	6516.09	5874.51	8587.27	20171.6	14489	8591.89
CAK45104	71068	55850	55252	49571	35551	11836	67831.4	54274.8	57074.9	49797.3	35521.6	12053.3
CAK44984	3346	4052	1570	693	652	302	3193.62	3937.72	1621.8	696.163	651.461	307.544
CAK44946	11332	14140	8327	2288	2395	4287	10815.9	13741.2	8601.73	2298.44	2393.02	4365.7
CAK44944	10228	11835	12215	3314	3157	4834	9762.2	11501.2	12618	3329.13	3154.39	4922.74
CAK44892	3919	3157	921	3316	3220	2217	3740.52	3067.96	951.387	3331.14	3217.34	2257.7
CAK44891	17189	13694	13000	9124	10378	8469	16406.2	13307.8	13428.9	9165.64	10369.4	8624.47
CAK44859	5246	3526	2911	12316	8362	8837	5007.09	3426.55	3007.04	12372.2	8355.09	8999.23
CAK44840	5293	6754	2037	2665	1838	2623	5051.95	6563.51	2104.21	2677.16	1836.48	2671.15
CAK44837	2305	2554	1961	1629	1666	1291	2200.03	2481.97	2025.7	1636.44	1664.62	1314.7
CAK44834	30419	26937	20785	43882	30481	34948	29033.7	26177.3	21470.8	44082.3	30455.8	35589.6
CAK44745	42507	40858	37443	28264	20301	24760	40571.2	39705.7	38678.4	28393	20284.2	25214.5
CAK44712	25872	21881	21813	32171	23638	36900	24693.7	21263.9	22532.7	32317.8	23618.5	37577.4
CAK44708	82863	60395	59384	85300	81742	71842	79089.3	58691.6	61343.3	85689.3	81674.5	73160.9
CAK44707	11395	14509	6747	1298	1214	1670	10876.1	14099.8	6969.6	1303.92	1213	1700.66
CAK44706	13877	12838	9400	11302	13035	12763	13245	12475.9	9710.14	11353.6	13024.2	12997.3
CAK44699	6772	7294	7465	8359	6841	10003	6463.59	7088.28	7711.29	8397.15	6835.35	10186.6
CAK44690	2025	1634	1963	1199	1241	2034	1932.78	1587.92	2027.77	1204.47	1239.97	2071.34
CAK44684	8020	14169	6874	661	819	1657	7654.76	13769.4	7100.79	664.017	818.324	1687.42
CAK44676	3758	890	1181	3830	3444	3894	3586.85	864.899	1219.96	3847.48	3441.16	3965.49
CAK44668	13101	20063	5861	4057	3455	3198	12504.4	19497.1	6054.37	4075.52	3452.15	3256.71
CAK44645	7071	5476	6144	4315	4498	5248	6748.98	5321.56	6346.71	4334.69	4494.28	5344.34
CAK44628	3527	3260	1890	1655	984	1423	3366.37	3168.06	1952.36	1662.55	983.187	1449.12
CAK44599	19315	20772	17817	22550	22516	24857	18435.4	20186.2	18404.8	22652.9	22497.4	25313.3
CAK44581	34156	36817	32313	16299	13415	10938	32600.5	35778.6	33379.1	16373.4	13403.9	11138.8
CAK44533	1012	1457	507	1667	955	1484	965.912	1415.91	523.728	1674.61	954.211	1511.24
CAK44498	4806	4512	1645	5978	7328	4125	4587.13	4384.74	1699.27	6005.29	7321.95	4200.73
CAK44466	85050	83485	85364	21747	11790	12494	81176.7	81130.4	88180.4	21846.3	11780.3	12723.4
CAK44463	20141	17063	17704	17569	20116	25374	19223.7	16581.8	18288.1	17649.2	20099.4	25839.8
CAK44453	17698	17839	23198	10692	9197	15515	16892	17335.9	23963.4	10740.8	9189.4	15799.8
CAK44448	9992	13846	17799	9124	12702	47747	9536.95	13455.5	18386.2	9165.64	12691.5	48623.5
CAK44423	7116	5730	7366	10834	10161	11655	6791.93	5568.39	7609.03	10883.4	10152.6	11869
CAK44419	11603	11731	9780	2832	2641	3173	11074.6	11400.1	10102.7	2844.93	2638.82	3231.25
CAK44414	5811	5847	3444	680	1443	1811	5546.36	5682.09	3557.63	683.104	1441.81	1844.25
CAK44398	39156	11367	20595	15001	9656	9662	37372.8	11046.4	21274.5	15069.5	9648.02	9839.38
CAK44342	4071	5290	2760	1789	1221	2747	3885.6	5140.8	2851.06	1797.17	1219.99	2797.43
CAK44324	4315	7825	2431	4359	5739	7686	4118.49	7604.31	2511.21	4378.9	5734.26	7827.1
CAK44309	10728	10023	8650	15524	10705	10216	10239.4	9740.31	8935.39	15594.9	10696.2	10403.5
CAK44297	758	684	887	472	772	894	723.479	664.709	916.265	474.154	771.362	910.412
CAK44283	3616	3297	3099	1274	926	1357	3451.32	3204.01	3201.25	1279.81	925.235	1381.91
CAK44275	11173	13668	821	7246	6863	10012	10664.2	13282.5	848.087	7279.07	6857.33	10195.8
CAK44251	2717	5983	3498	6544	5746	3065	2593.26	5814.26	3613.41	6573.87	5741.25	3121.27
CAK44205	208342	237968	250019	307719	457849	264184	198854	231256	258268	309124	457471	269034
CAK44204	68853	62228	64668	69624	64831	47934	65717.3	60472.9	66801.6	69941.8	64777.5	48814
CAK44192	2237	3386	3448	2633	2296	3525	2135.12	3290.5	3561.76	2645.02	2294.1	3589.71
CAK44127	6514	5967	8875	7671	8052	5023	6217.34	5798.71	9167.81	7706.01	8045.35	5115.21
CAK44119	40709	29132	30977	8042	8803	2058	38855	28310.4	31999	8078.71	8795.73	2095.78
CAK44065	27097	32220	18006	83247	105902	37372	25863	31311.3	18600.1	83627	105815	38058.1
CAK44001	1000	1607	644	1074	1146	776	954.458	1561.68	665.248	1078.9	1145.05	790.246
CAK43998	30375	41161	11398	33290	54673	59096	28991.7	40000.1	11774.1	33441.9	54627.8	60180.9
CAK43956	12199	9925	13205	6453	8152	7311	11643.4	9645.08	13640.7	6482.45	8145.27	7445.22
CAK43948	5631	6136	2940	3323	3089	3359	5374.56	5962.94	3037	3338.17	3086.45	3420.66
CAK43942	14461	15346	20086	4553	3067	4665	13802.4	14913.2	20748.7	4573.78	3064.47	4750.64
CAK43935	8573	8740	3929	838	1657	4934	8182.57	8493.5	4058.63	841.825	1655.63	5024.58
CAK43931	222802	235402	161941	76279	57701	78600	212655	228763	167284	76627.2	57653.3	80042.9
CAK43924	1260	1022	2113	1187	1109	1258	1202.62	993.176	2182.71	1192.42	1108.08	1281.09
CAK43905	9770	9446	7522	12738	6016	14044	9325.06	9179.59	7770.17	12796.1	6011.03	14301.8
CAK43903	4115	5479	5073	5472	5356	6929	3927.6	5324.47	5240.37	5496.98	5351.58	7056.2
CAK43893	2184	993	2359	2272	2141	4043	2084.54	964.994	2436.83	2282.37	2139.23	4117.22
CAK43861	44500	47467	22352	64436	70380	56381	42473.4	46128.3	23089.5	64730.1	70321.9	57416
CAK43818	29437	37563	12250	4081	4827	5334	28096.4	36503.6	12654.2	4099.63	4823.01	5431.92
CAK43810	23942	29986	16319	1901	3515	1652	22851.6	29140.3	16857.4	1909.68	3512.1	1682.33
CAK43780	3735	6664	6440	2780	2198	3439	3564.9	6476.05	6652.48	2792.69	2196.18	3502.13
CAK43766	1415	901	3106	6214	3114	1258	1350.56	875.588	3208.48	6242.36	3111.43	1281.09
CAK43757	49002	59270	38621	71723	109499	54764	46770.4	57598.4	39895.2	72050.4	109409	55769.4
CAK43731	1396	2209	1375	4643	3992	4489	1332.42	2146.7	1420.37	4664.19	3988.7	4571.41
CAK43706	1112	1185	1889	338	744	2034	1061.36	1151.58	1951.32	339.543	743.385	2071.34
CAK43701	73234	69387	43175	15028	12521	11320	69898.8	67430	44599.5	15096.6	12510.7	11527.8
CAK43681	4277	4815	4618	3275	4741	4031	4082.22	4679.2	4770.36	3289.95	4737.08	4105
CAK43678	4108	3438	3108	3522	2673	5249	3920.92	3341.04	3210.54	3538.08	2670.79	5345.36
CAK43676	38964	43296	28614	67914	106788	39341	37189.5	42074.9	29558.1	68224	106700	40063.2
CAK43653	13752	8172	5888	11294	9601	9168	13125.7	7941.52	6082.26	11345.5	9593.07	9336.31
CAK43652	5494	5504	5090	5011	3809	4364	5243.79	5348.77	5257.94	5033.87	3805.85	4444.11
CAK43520	101567	78359	74164	208620	239276	182512	96941.5	76149	76610.9	209572	239078	185863
CAK43492	2656	2901	7370	3162	2959	3031	2535.04	2819.18	7613.16	3176.43	2956.56	3086.64
CAK43491	14392	16300	10232	4277	3394	8887	13736.6	15840.3	10569.6	4296.52	3391.2	9050.15
CAK43489	5566	8618	8167	5761	5193	6722	5312.52	8374.94	8436.45	5787.29	5188.71	6845.4
CAK43477	4775	2139	3880	8216	6799	8002	4557.54	2078.67	4008.01	8253.5	6793.38	8148.9
CAK43444	61522	30947	34325	126256	117497	70747	58720.2	30074.2	35457.5	126832	117400	72045.8
CAK43380	20094	14027	12558	23135	22609	23365	19178.9	13631.4	12972.3	23240.6	22590.3	23793.9
CAK43354	62454	63316	34703	34273	35245	39115	59609.7	61530.3	35848	34429.4	35215.9	39833.1
CAK43347	29199	33226	23713	22966	12897	10737	27869.2	32288.9	24495.4	23070.8	12886.3	10934.1
CAK43328	30451	20831	19613	28909	23017	25548	29064.2	20243.5	20260.1	29040.9	22998	26017
CAK43307	6036	6698	8059	5892	5520	4850	5761.11	6509.09	8324.89	5918.89	5515.44	4939.04
CAK43303	7969	5465	1186	30927	20163	51092	7606.08	5310.87	1225.13	31068.2	20146.3	52030
CAK43275	12292	11705	5457	4417	3607	3596	11732.2	11374.9	5637.04	4437.16	3604.02	3662.02
CAK43269	6780	7582	4156	2000	2745	2862	6471.23	7368.16	4293.12	2009.13	2742.73	2914.54
CAK43248	2421	599	2974	2875	2827	3167	2310.74	582.106	3072.12	2888.12	2824.67	3225.14
CAK43224	1050000	909291	842614	1110000	1330000	1299999	1.00218e+06	883646	870414	1.11507e+06	1.3289e+06	1.32386e+06
CAK43195	7447	5962	10359	10019	10385	4740	7107.85	5793.85	10700.8	10064.7	10376.4	4827.02
CAK43166	6185	8859	1710	1892	299	2564	5903.33	8609.14	1766.42	1900.64	298.753	2611.07
CAK43149	23557	37851	46616	4926	9018	21358	22484.2	36783.5	48154	4948.48	9010.55	21750.1
CAK43110	1199	4262	6628	10947	722	8825	1144.4	4141.8	6846.68	10997	721.404	8987.01
CAK43102	3018	3627	2446	1012	676	673	2880.56	3524.71	2526.7	1016.62	675.442	685.355
CAK43076	6405	5844	2237	2157	1938	1932	6113.31	5679.18	2310.81	2166.85	1936.4	1967.47
CAK43073	111550	124911	105952	23395	24424	38479	106470	121388	109448	23501.8	24403.8	39185.4
CAK43071	25384	31910	30076	4272	4190	6233	24228	31010	31068.3	4291.5	4186.54	6347.43
CAK43067	17745	25187	14423	4897	4985	6208	16936.9	24476.6	14898.9	4919.35	4980.88	6321.97
CAK43052	23059	17374	9678	22461	23034	17172	22008.9	16884	9997.31	22563.5	23015	17487.2
CAK43051	10115	13414	6273	3343	2140	2110	9654.35	13035.7	6479.97	3358.26	2138.23	2148.74
CAK43040	6091	6773	3409	3499	3591	2676	5813.61	6581.98	3521.47	3514.97	3588.03	2725.13
CAK43038	167957	208383	118942	92850	92852	57615	160308	202506	122866	93273.8	92775.3	58672.7
CAK43006	7969	6712	7863	10520	7632	7987	7606.08	6522.7	8122.43	10568	7625.7	8133.63
CAK42996	7675	8944	4826	6847	4112	3708	7325.47	8691.75	4985.22	6878.25	4108.6	3776.07
CAK42957	11615	17790	23352	33273	35616	24714	11086	17288.3	24122.5	33424.9	35586.6	25167.7
CAK42956	76292	89605	47631	26194	17598	52978	72817.5	87077.8	49202.5	26313.6	17583.5	53950.6
CAK42954	40332	34877	27471	213375	157952	139237	38495.2	33893.3	28377.4	214349	157822	141793
CAK42948	20318	24223	17227	15464	12100	20494	19392.7	23539.8	17795.4	15534.6	12090	20870.2
CAK42944	4742	5244	4103	3935	3148	3412	4526.04	5096.1	4238.37	3952.96	3145.4	3474.64
CAK42932	10641	9325	7632	2751	3099	4105	10156.4	9062	7883.8	2763.56	3096.44	4180.36
CAK42928	2310	3334	4395	1739	2341	2854	2204.8	3239.97	4540	1746.94	2339.07	2906.39
CAK42924	51434	59528	33647	11187	10613	12490	49091.6	57849.1	34757.1	11238.1	10604.2	12719.3
CAK42901	17734	21021	16257	21507	13856	23289	16926.4	20428.1	16793.4	21605.2	13844.6	23716.5
CAK42892	38814	37623	27279	45159	46414	20995	37046.3	36561.9	28179	45365.1	46375.7	21380.4
CAK42888	51189	48019	52143	36392	30455	41464	48857.8	46664.7	53863.4	36558.1	30429.8	42225.2
CAK42881	3639	3131	4078	715	1114	958	3473.27	3042.69	4212.55	718.263	1113.08	975.587
CAK42869	11287	8613	6857	15179	7269	4256	10773	8370.08	7083.23	15248.3	7263	4334.13
CAK42848	8657	6337	10750	6117	12032	8433	8262.75	6158.27	11104.7	6144.92	12022.1	8587.81
CAK42836	40997	36844	32335	35892	25691	53570	39129.9	35804.9	33401.8	36055.8	25669.8	54553.4
CAK42828	9734	8526	7561	6452	4887	5635	9290.7	8285.53	7810.46	6481.45	4882.96	5738.45
CAK42806	12611	10515	15808	15573	12685	13096	12036.7	10218.4	16329.6	15644.1	12674.5	13336.4
CAK42799	87747	82442	49554	118311	108861	76983	83750.9	80116.8	51188.9	118851	108771	78396.3
CAK42790	5988	7414	9496	44482	36333	40274	5715.3	7204.9	9809.3	44685	36303	41013.4
CAK42746	6484	5197	1798	1216	2031	845	6188.71	5050.43	1857.32	1221.55	2029.32	860.513
CAK42710	96627	74667	94139	98183	86268	109601	92226.5	72561.1	97244.9	98631.1	86196.7	111613
CAK42702	7114	6361	4514	2810	3947	2180	6790.02	6181.6	4662.93	2822.83	3943.74	2220.02
CAK42668	3749	3213	1658	988	1027	1646	3578.26	3122.38	1712.7	992.509	1026.15	1676.22
CAK42667	2218	1807	2620	676	888	833	2116.99	1756.04	2706.44	679.085	887.267	848.292
CAK42634	9013	11625	8228	5448	3656	4676	8602.53	11297.1	8499.47	5472.87	3652.98	4761.84
CAK42617	15411	13712	12573	10682	10160	8391	14709.2	13325.3	12987.8	10730.8	10151.6	8545.04
CAK42599	1295	1412	2003	1810	716	514	1236.02	1372.18	2069.09	1818.26	715.409	523.436
CAK42593	4021	2914	3223	3382	2425	3171	3837.88	2831.81	3329.34	3397.44	2423	3229.21
CAK42583	3295	4758	3957	2734	2150	4854	3144.94	4623.81	4087.55	2746.48	2148.22	4943.11
CAK42575	6002	6137	4877	7471	5833	6011	5728.66	5963.91	5037.91	7505.1	5828.18	6121.35
CAK42566	20727	18445	12455	9792	7241	10559	19783.1	17924.8	12865.9	9836.69	7235.02	10752.8
CAK42564	10872	10215	7782	11355	13760	11349	10376.9	9926.9	8038.75	11406.8	13748.6	11557.3
CAK42557	5607	6668	5472	3495	3574	3905	5351.65	6479.94	5652.54	3510.95	3571.05	3976.69
CAK42549	54875	68719	99187	22241	28122	41806	52375.9	66780.9	102459	22342.5	28098.8	42573.5
CAK42542	23397	18805	16525	15513	15660	19065	22331.5	18274.6	17070.2	15583.8	15647.1	19415
CAK42538	15206	18211	18874	17458	20611	18100	14513.5	17697.4	19496.7	17537.7	20594	18432.3
CAK42537	40311	33434	40206	44212	43699	25574	38475.2	32491	41532.5	44413.8	43662.9	26043.5
CAK42528	36374	27459	23332	8808	7409	9177	34717.5	26684.6	24101.8	8848.2	7402.88	9345.47
CAK42502	31236	36985	29921	3605	3997	5581	29813.5	35941.9	30908.2	3621.45	3993.7	5683.46
CAK42486	14348	11418	11078	11369	10957	9187	13694.6	11096	11443.5	11420.9	10947.9	9355.66
CAK42428	16588	20258	24709	4507	2908	3611	15832.6	19686.6	25524.2	4527.57	2905.6	3677.29
CAK42424	9802	7835	8449	17940	14049	13104	9355.6	7614.02	8727.76	18021.9	14037.4	13344.6
CAK42390	55932	68763	35541	6594	10171	12708	53384.8	66823.6	36713.6	6624.1	10162.6	12941.3
CAK42360	1233	1025	931	2167	2802	1528	1176.85	996.091	961.717	2176.89	2799.69	1556.05
CAK42356	12300	10241	14165	18298	15929	14396	11739.8	9952.17	14632.3	18381.5	15915.8	14660.3
CAK42342	1581	2561	2505	1702	2466	1745	1509	2488.77	2587.65	1709.77	2463.96	1777.03
CAK42322	425	453	972	580	339	714	405.645	440.224	1004.07	582.647	338.72	727.108
CAK42307	8812	12081	6516	20278	22921	11539	8410.69	11740.3	6730.98	20370.6	22902.1	11750.8
CAK42282	6639	8144	2829	450	533	731	6336.65	7914.31	2922.34	452.054	532.56	744.42
CAK42271	9310	8246	6071	27616	20208	22689	8886.01	8013.43	6271.3	27742	20191.3	23105.5
CAK42268	5663	6312	5375	4277	3212	4697	5405.1	6133.98	5552.34	4296.52	3209.35	4783.23
CAK42267	32771	32143	34879	21078	17068	8205	31278.6	31236.4	36029.8	21174.2	17053.9	8355.63
CAK42236	1852	2158	726	1606	1400	1776	1767.66	2097.14	749.953	1613.33	1398.84	1808.6
CAK42214	1070	1975	315	388	458	595	1021.27	1919.3	325.393	389.771	457.622	605.923
CAK42209	21960	20422	13140	10901	6074	5550	20959.9	19846	13573.5	10950.8	6068.98	5651.89
CAK42184	8294	8502	4389	11027	7276	8951	7916.28	8262.21	4533.81	11077.3	7269.99	9115.32
CAK42172	1864	5298	2103	1484	1428	2059	1779.11	5148.58	2172.38	1490.77	1426.82	2096.8
CAK42152	32353	25676	18959	12572	12234	13880	30879.6	24951.8	19584.5	12629.4	12223.9	14134.8
CAK42112	1416	949	709	3128	2545	2024	1351.51	922.235	732.392	3142.28	2542.9	2061.16
CAK42111	5160	4782	963	5870	5992	6519	4925.01	4647.13	994.772	5896.79	5987.05	6638.68
CAK42076	1203	842	1049	1004	223	738	1148.21	818.252	1083.61	1008.58	222.816	751.548
CAK42011	2445	1765	2452	1566	1249	883	2333.65	1715.22	2532.9	1573.15	1247.97	899.21
CAK41966	19885	22842	17794	4236	3794	6342	18979.4	22197.8	18381.1	4255.33	3790.87	6458.43
CAK41965	24794	20416	20849	33598	22836	38782	23664.8	19840.2	21536.9	33751.3	22817.1	39494
CAK41956	7843	5887	1384	7936	8655	1595	7485.82	5720.96	1429.66	7972.22	8647.85	1624.28
CAK41946	21940	20369	16035	6935	7971	7258	20940.8	19794.5	16564	6966.65	7964.42	7391.24
CAK41933	11699	14446	7419	5082	3907	6809	11166.2	14038.6	7663.78	5105.2	3903.77	6934
CAK41896	13588	16362	10868	27197	21543	25297	12969.2	15900.5	11226.6	27321.1	21525.2	25761.4
CAK41894	43271	42986	32849	7015	6698	11262	41300.4	41773.6	33932.8	7047.02	6692.47	11468.7
CAK41893	10920	10234	6141	10137	12304	9614	10422.7	9945.36	6343.61	10183.3	12293.8	9790.49
CAK41889	9421	11197	6650	10193	5314	12901	8991.95	10881.2	6869.4	10239.5	5309.61	13137.8
CAK41887	17661	17259	16295	24679	22135	22771	16856.7	16772.2	16832.6	24791.6	22116.7	23189
CAK41881	44049	40528	52053	78198	96987	191773	42042.9	39385	53770.4	78554.9	96906.9	195294
CAK41879	28898	45916	77707	42967	42712	64263	27581.9	44621	80270.8	43163.1	42676.7	65442.7
CAK41863	38889	48568	30724	49881	52390	69078	37117.9	47198.2	31737.7	50108.7	52346.7	70346.1
CAK41826	6928	4575	7845	7493	9218	3161	6612.49	4445.97	8103.83	7527.2	9210.39	3219.03
CAK41822	4340	3324	4313	10737	10612	7921	4142.35	3230.25	4455.3	10786	10603.2	8066.41
CAK41820	14495	13723	8686	9365	10582	9626	13834.9	13336	8972.58	9407.74	10573.3	9802.71
CAK41816	11020	16738	16062	13500	8459	8346	10518.1	16265.9	16591.9	13561.6	8452.01	8499.22
CAK41810	1198	1380	1593	3504	5858	2383	1143.44	1341.08	1645.56	3519.99	5853.16	2426.75
CAK41805	338115	208855	230197	777565	581448	679587	322717	202965	237792	781114	580968	692063
CAK41799	1204	2360	1286	130	211	1121	1149.17	2293.44	1328.43	130.593	210.826	1141.58
CAK41794	7480	10951	9543	6442	4826	6576	7139.35	10642.1	9857.85	6471.4	4822.01	6696.72
CAK41761	1805	1600	785	218	419	406	1722.8	1554.87	810.9	218.995	418.654	413.453
CAK41756	1556	2504	1500	2760	1597	2435	1485.14	2433.38	1549.49	2772.6	1595.68	2479.7
CAK41684	3250	4684	2030	2612	2931	2589	3101.99	4551.89	2096.98	2623.92	2928.58	2636.53
CAK41670	34675	44925	39648	24225	45147	25266	33095.8	43657.9	40956.1	24335.6	45109.7	25729.8
CAK41640	3975	5600	4860	956	1319	1096	3793.97	5442.06	5020.35	960.363	1317.91	1116.12
CAK41591	14901	20370	16148	36521	46387	34039	14222.4	19795.5	16680.8	36687.7	46348.7	34663.9
CAK41480	7105	9238	6133	3357	1975	2588	6781.43	8977.45	6335.35	3372.32	1973.37	2635.51
CAK41479	12530	7060	13509	9130	7075	11018	11959.4	6860.88	13954.7	9171.67	7069.16	11220.3
CAK41475	91524	94084	61286	37645	36377	41759	87355.9	91430.5	63308	37816.8	36347	42525.6
CAK41469	5096	9395	8583	939	3800	6911	4863.92	9130.03	8866.18	943.286	3796.86	7037.87
CAK41455	43022	43352	33409	78974	86130	35935	41062.7	42129.3	34511.3	79334.5	86058.9	36594.7
CAK41387	2304	1316	1215	5068	3874	3652	2199.07	1278.88	1255.09	5091.13	3870.8	3719.04
CAK41385	2447	3084	1409	2167	1414	1834	2335.56	2997.02	1455.49	2176.89	1412.83	1867.67
CAK41383	38783	38377	36667	12583	10935	16652	37016.8	37294.6	37876.8	12640.4	10926	16957.7
CAK41339	25573	36350	32320	15684	22179	35317	24408.4	35324.8	33386.3	15755.6	22160.7	35965.4
CAK41329	10754	13048	9821	3025	3555	2623	10264.2	12680	10145	3038.81	3552.06	2671.15
CAK41306	45578	54930	64313	29860	25952	24816	43502.3	53380.8	66434.9	29996.3	25930.6	25271.6
CAK41245	1045	1629	1398	671	906	458	997.409	1583.06	1444.12	674.063	905.252	466.408
CAK41223	274430	190813	130297	131149	63993	67966	261932	185431	134596	131748	63940.1	69213.7
CAK41222	64975	73087	40028	20012	19526	28933	62015.9	71025.7	41348.6	20103.3	19509.9	29464.2
CAK41125	1090	1151	1522	443	801	725	1040.36	1118.54	1572.22	445.022	800.338	738.31
CAK41124	196926	174325	140275	323409	329415	406352	187958	169408	144903	324885	329143	413812
CAK41087	1879	2234	3537	1551	1003	1530	1793.43	2170.99	3653.7	1558.08	1002.17	1558.09
CAK41051	21612	19978	25015	13251	13761	12618	20627.8	19414.5	25840.3	13311.5	13749.6	12849.6
CAK41049	172473	153048	119807	70856	58395	42983	164618	148731	123760	71179.4	58346.8	43772.1
CAK41038	21254	22152	40969	26388	21391	20019	20286.1	21527.2	42320.7	26508.4	21373.3	20386.5
CAK41034	6293	8892	5461	5499	5094	5361	6006.41	8641.21	5641.18	5524.1	5089.79	5459.42
CAK41010	408510	399704	470256	220055	179582	293090	389906	388431	485771	221059	179434	298471
CAK40987	3616	3987	3168	439	1316	1425	3451.32	3874.55	3272.52	441.004	1314.91	1451.16
CAK40984	13075	9583	13699	15919	12402	20668	12479.5	9312.72	14151	15991.7	12391.8	21047.4
CAK40952	130482	68084	68082	408638	321063	194169	124540	66163.8	70328.2	410503	320798	197734
CAK40877	18766	20103	12211	5662	4777	5212	17911.4	19536	12613.9	5687.84	4773.05	5307.68
CAK40839	9191	8876	2969	6178	5728	2606	8772.43	8625.66	3066.96	6206.2	5723.27	2653.84
CAK40813	228898	218568	112019	364151	474162	275908	218474	212404	115715	365813	473770	280973
CAK40808	11589	10856	9815	11213	12079	10622	11061.2	10549.8	10138.8	11264.2	12069	10817
CAK40725	7326	8019	6082	2736	2805	3568	6992.36	7792.83	6282.66	2748.49	2802.68	3633.5
CAK40685	85056	65203	45213	217388	216924	153829	81182.4	63364	46704.7	218380	216745	156653
CAK40682	5592	7710	2845	3631	2624	5025	5337.33	7492.55	2938.87	3647.57	2621.83	5117.25
CAK40680	49898	38607	44061	133641	104725	54091	47625.6	37518.1	45514.7	134251	104639	55084
CAK40669	1599999	1549999	838778	661313	441355	793927	1.52713e+06	1.50628e+06	866452	664331	440990	808502
CAK40650	259368	266933	250881	200272	163661	247904	247556	259404	259158	201186	163526	252455
CAK40631	7422	6854	6251	2523	1290	2786	7083.99	6660.69	6457.24	2534.52	1288.93	2837.15
CAK40622	442	1104	545	1655	1795	1481	421.871	1072.86	562.981	1662.55	1793.52	1508.19
CAK40602	20554	24895	19648	4284	5775	4616	19617.9	24192.9	20296.2	4303.55	5770.23	4700.74
CAK40597	13756	14342	14398	9444	8972	13023	13129.5	13937.5	14873	9487.1	8964.59	13262.1
CAK40582	44242	50762	34369	43832	37333	40056	42227.1	49330.3	35502.9	44032.1	37302.2	40791.4
CAK40574	20434	18419	16810	13093	21376	12761	19503.4	17899.5	17364.6	13152.8	21358.3	12995.3
CAK40570	3349	4118	2475	4926	3059	4483	3196.48	4001.86	2556.66	4948.48	3056.47	4565.3
CAK40519	18084	23217	19802	4105	6126	6682	17260.4	22562.2	20455.3	4123.74	6120.94	6804.67
CAK40517	28357	28919	34786	11027	17579	19315	27065.6	28103.4	35933.7	11077.3	17564.5	19669.6
CAK40487	2377	1266	1860	1298	1728	737	2268.75	1230.29	1921.37	1303.92	1726.57	750.53
CAK40471	16532	12021	11536	11181	10750	4956	15779.1	11682	11916.6	11232	10741.1	5046.98
CAK40466	5466	5346	2828	802	922	1313	5217.07	5195.22	2921.3	805.661	921.238	1337.1
CAK40454	5626	3100	3993	1995	2051	2613	5369.78	3012.57	4124.74	2004.11	2049.31	2660.97
CAK40425	19337	19397	17700	23048	17090	15108	18456.4	18849.9	18284	23153.2	17075.9	15385.4
CAK40411	3117	3350	1789	4566	4836	5255	2975.05	3255.52	1848.02	4586.84	4832.01	5351.47
CAK40402	253872	221102	192450	318832	255331	575765	242310	214866	198800	320287	255120	586335
CAK40395	27703	19083	20305	19222	19544	20706	26441.4	18544.8	20974.9	19309.7	19527.9	21086.1
CAK40373	4607	4803	2653	7136	3942	10914	4397.19	4667.54	2740.53	7168.57	3938.74	11114.4
CAK40343	12267	8896	11271	6339	4963	3176	11708.3	8645.1	11642.9	6367.93	4958.9	3234.31
CAK40340	3778	3547	2144	755	762	635	3605.94	3446.96	2214.74	758.446	761.371	646.657
CAK40335	15043	15815	14190	20899	17432	17286	14357.9	15369	14658.2	20994.4	17417.6	17603.3
CAK40323	2362	2444	3260	323	307	928	2254.43	2375.07	3367.56	324.474	306.746	945.036
CAK40293	2040	2598	2049	6650	16100	69993	1947.1	2524.73	2116.6	6680.35	16086.7	71277.9
CAK40290	10288	10162	7546	5427	5400	6695	9819.47	9875.39	7794.97	5451.77	5395.54	6817.91
CAK40264	7395	9887	4459	1819	1550	1353	7058.22	9608.15	4606.12	1827.3	1548.72	1377.84
CAK40260	2378	2634	1257	493	922	1097	2269.7	2559.71	1298.47	495.25	921.238	1117.14
CAK40255	17916	20254	12318	4872	5927	6032	17100.1	19682.8	12724.4	4894.24	5922.1	6142.74
CAK40246	83929	75423	79248	47922	32759	55725	80106.7	73295.8	81862.6	48140.7	32731.9	56748
CAK40244	7899	10361	12461	8528	14972	17010	7539.27	10068.8	12872.1	8566.92	14959.6	17322.3
CAK40230	5481	4505	3213	245	928	746	5231.39	4377.94	3319.01	246.118	927.234	759.695
CAK40221	6765	6720	4158	6610	5219	5613	6456.91	6530.47	4295.19	6640.17	5214.69	5716.04
CAK40217	12546	9523	8205	8383	7821	8933	11974.6	9254.42	8475.71	8421.26	7814.54	9096.99
CAK40191	5830	6886	4475	5637	3875	4435	5564.49	6691.79	4622.64	5662.73	3871.8	4516.42
CAK40166	45923	47819	41567	10393	9655	13285	43831.6	46470.3	42938.4	10440.4	9647.03	13528.9
CAK40122	11892	13099	14968	3728	3499	3936	11350.4	12729.6	15461.8	3745.02	3496.11	4008.26
CAK40043	1592	2285	2649	2484	2708	1458	1519.5	2220.55	2736.4	2495.34	2705.76	1484.77
CAK40029	6834	6074	8223	3285	4168	2944	6522.77	5902.69	8494.3	3299.99	4164.56	2998.05
CAK40008	4179	3958	1870	6928	5073	3271	3988.68	3846.37	1931.7	6959.62	5068.81	3331.05
CAK39995	14707	12337	9801	9353	8569	7383	14037.2	11989.1	10124.4	9395.69	8561.92	7518.54
CAK39983	22905	18149	18315	77839	45043	55549	21861.9	17637.1	18919.3	78194.3	45005.8	56568.8
CAK39949	10774	11420	7458	5430	3034	4600	10283.3	11097.9	7704.06	5454.78	3031.49	4684.45
CAK39945	11062	11043	9666	12627	12897	8696	10558.2	10731.5	9984.91	12684.6	12886.3	8855.64
CAK39912	5327	13889	1549	1577	2692	2195	5084.4	13497.3	1600.11	1584.2	2689.78	2235.3
CAK39900	15451	16290	17815	22679	26061	12482	14747.3	15830.6	18402.8	22782.5	26039.5	12711.1
CAK39899	46717	58958	26464	21706	20649	20285	44589.4	57295.2	27337.1	21805.1	20631.9	20657.4
CAK39895	9345	10091	9647	8507	6458	7947	8919.41	9806.4	9965.28	8545.83	6452.67	8092.89
CAK39778	242302	211571	170961	311433	292515	336583	231267	205604	176602	312854	292273	342762
CAK39755	66625	59842	47444	61321	51229	55795	63590.8	58154.2	49009.3	61600.9	51186.7	56819.3
CAK39750	4232	4454	3664	1331	1380	1231	4039.27	4328.38	3784.89	1337.07	1378.86	1253.6
CAK39749	16598	31001	24449	33109	36789	42201	15842.1	30126.7	25255.6	33260.1	36758.6	42975.7
CAK39747	7940	8871	2013	2041	2556	2173	7578.4	8620.8	2079.42	2050.32	2553.89	2212.89
CAK39746	9447	9654	7733	12724	11850	14279	9016.77	9381.72	7988.14	12782.1	11840.2	14541.1
CAK39734	7317	6926	3574	4432	3436	5114	6983.77	6730.66	3691.92	4452.23	3433.16	5207.88
CAK39722	12445	17265	5883	1712	1792	3588	11878.2	16778.1	6077.1	1719.81	1790.52	3653.87
CAK39719	6421	4668	3374	7508	5897	4135	6128.58	4536.34	3485.32	7542.27	5892.13	4210.91
CAK39692	3259	3258	2608	5383	5615	4557	3110.58	3166.11	2694.05	5407.57	5610.36	4640.66
CAK39684	7015	7947	6874	3213	3631	3967	6695.53	7722.86	7100.79	3227.66	3628	4039.83
CAK39682	104233	91896	86244	28783	34906	52630	99486.1	89304.2	89089.5	28914.4	34877.2	53596.2
CAK39674	9988	10580	14742	8032	15095	9881	9533.13	10281.6	15228.4	8068.66	15082.5	10062.4
CAK39599	9923	8858	9366	3365	2351	1923	9471.09	8608.17	9675.01	3380.36	2349.06	1958.3
CAK39583	365745	370887	309696	185259	199729	102719	349088	360427	319914	186105	199564	104605
CAK39567	199333	222545	241428	53307	47120	71708	190255	216268	249393	53550.3	47081.1	73024.4
CAK39565	14077	16518	14099	3859	4405	7136	13435.9	16052.1	14564.2	3876.61	4401.36	7267
CAK39544	26991	34079	33887	65389	105279	70006	25761.8	33117.8	35005	65687.5	105192	71291.2
CAK39541	11399	13637	7766	3404	3754	3653	10879.9	13252.4	8022.22	3419.54	3750.9	3720.06
CAK39522	16082	15410	17623	25107	20605	39128	15349.6	14975.4	18204.4	25221.6	20588	39846.3
CAK39502	36502	49369	17148	65247	88306	44153	34839.6	47976.6	17713.8	65544.8	88233.1	44963.6
CAK39498	2754	924	2469	916	1178	1067	2628.58	897.94	2550.46	920.181	1177.03	1086.59
CAK39472	4280	3642	1910	885	833	1021	4085.08	3539.28	1973.02	889.039	832.312	1039.74
CAK39467	11158	11314	7856	4269	3481	5577	10649.8	10994.9	8115.19	4288.48	3478.12	5679.38
CAK39466	28693	31767	15312	10161	5487	5312	27386.3	30871.1	15817.2	10207.4	5482.47	5409.52
CAK39435	6139	5074	1133	3370	2643	4354	5859.42	4930.89	1170.38	3385.38	2640.82	4433.93
CAK39427	10233	9774	20581	19703	28965	6546	9766.97	9498.34	21260	19792.9	28941.1	6666.17
CAK39392	1078	1744	1244	2564	2052	2187	1028.91	1694.81	1285.04	2575.7	2050.31	2227.15
CAK39383	13929	16384	21613	5975	4805	8750	13294.7	15921.9	22326.1	6002.27	4801.03	8910.63
CAK39315	28107	30166	17773	32395	36431	26762	26827	29315.2	18359.4	32542.9	36400.9	27253.3
CAK39308	20849	27446	23055	34679	29866	25556	19899.5	26671.9	23815.7	34837.3	29841.3	26025.2
CAK39279	4276	4725	4686	4582	5209	4574	4081.26	4591.74	4840.61	4602.91	5204.7	4657.97
CAK39207	152247	139023	146443	342721	254923	398734	145313	135102	151275	344285	254712	406054
CAK39204	2966	1496	1756	2369	2123	544	2830.92	1453.81	1813.94	2379.81	2121.25	553.987
CAK39195	7052	3204	3435	10859	7541	4084	6730.84	3113.64	3548.33	10908.6	7534.77	4158.97
CAK39192	23121	32347	17697	5589	4159	6328	22068	31434.7	18280.9	5614.51	4155.56	6444.17
CAK39183	8499	8993	6221	8768	7169	7851	8111.94	8739.36	6426.25	8808.02	7163.08	7995.13
CAK39182	10565	9491	6733	7735	5735	4840	10083.9	9223.32	6955.14	7770.3	5730.26	4928.85
CAK39179	1615	2781	2055	3812	4290	5125	1541.45	2702.57	2122.8	3829.4	4286.46	5219.09
CAK39177	43019	23594	26064	24264	17204	14895	41059.8	22928.6	26923.9	24374.7	17189.8	15168.4
CAK39143	26381	44528	34722	7425	6587	7794	25179.6	43272.1	35867.6	7458.89	6581.56	7937.08
CAK39104	35149	51410	56229	7802	5656	13301	33548.3	49960	58084.2	7837.61	5651.33	13545.2
CAK39078	16405	10768	9870	10187	10461	9025	15657.9	10464.3	10195.6	10233.5	10452.4	9190.68
CAK39048	64442	69271	54486	22242	17915	18540	61507.2	67317.3	56283.7	22343.5	17900.2	18880.4
CAK39046	12515	14426	14197	11486	9831	16800	11945	14019.1	14665.4	11538.4	9822.88	17108.4
CAK39000	52827	32389	54682	21312	25886	29748	50421.2	31475.5	56486.1	21409.3	25864.6	30294.1
CAK38992	9148	10204	10010	8195	11125	6726	8731.39	9916.21	10340.3	8232.4	11115.8	6849.48
CAK38970	51108	50850	62708	59655	35081	75623	48780.5	49415.8	64776.9	59927.3	35052	77011.3
CAK38969	17012	18984	6324	7930	8930	10144	16237.2	18448.6	6532.65	7966.19	8922.62	10330.2
CAK38967	37209	37518	33165	52881	64035	26994	35514.4	36459.9	34259.2	53122.4	63982.1	27489.6
CAK38931	1324	755	691	1252	1541	1350	1263.7	733.706	713.798	1257.71	1539.73	1374.78
CAK38930	8785	12285	17940	19381	35136	8175	8384.92	11938.5	18531.9	19469.5	35107	8325.08
CAK38893	46171	38899	45919	19273	31066	33306	44068.3	37801.9	47434	19361	31040.3	33917.4
CAK38892	19367	30753	5726	30747	53252	9309	18485	29885.7	5914.92	30887.3	53208	9479.9
CAK38860	7787	1500	9173	11358	4853	8699	7432.37	1457.69	9475.65	11409.8	4848.99	8858.7
CAK38859	66710	61447	59838	33599	21541	24143	63671.9	59714	61812.2	33752.4	21523.2	24586.2
CAK38855	18941	13436	11382	20342	15945	11773	18078.4	13057.1	11757.5	20434.8	15931.8	11989.1
CAK38854	19010	18814	12609	17310	19358	27609	18144.3	18283.4	13025	17389	19342	28115.8
CAK38842	2714	2734	1184	2433	2311	2476	2590.4	2656.89	1223.06	2444.1	2309.09	2521.45
CAK38837	50736	26058	19153	162157	100118	148153	48425.4	25323.1	19784.9	162897	100035	150873
CAK38821	7557	7682	4944	3956	5861	4322	7212.84	7465.34	5107.12	3974.06	5856.16	4401.34
CAK38815	19679	12002	13352	7996	4741	5097	18782.8	11663.5	13792.5	8032.5	4737.08	5190.57
CAK38805	13287	10431	9402	11443	8096	14052	12681.9	10136.8	9712.2	11495.2	8089.31	14310
CAK38793	170881	91757	137105	258352	228645	295078	163099	89169.1	141629	259531	228456	300495
CAK38759	25776	21363	21787	41222	34358	43085	24602.1	20760.5	22505.8	41410.1	34329.6	43876
CAK38756	91437	71236	49359	70105	79098	42542	87272.8	69226.9	50987.5	70425	79032.7	43323
CAK38692	9488	12650	8498	6845	6593	5483	9055.9	12293.2	8778.38	6876.24	6587.55	5583.66
CAK38676	2523	3632	1578	1713	1645	1802	2408.1	3529.56	1630.06	1720.82	1643.64	1835.08
CAK38615	45070	29468	34586	73854	63381	102758	43017.4	28636.9	35727.1	74191.1	63328.6	104644
CAK38588	26154	17142	23716	50864	50509	46411	24962.9	16658.5	24498.5	51096.2	50467.3	47263
CAK38576	7583	7286	4775	6175	5754	9076	7237.66	7080.51	4932.54	6203.18	5749.25	9242.62
CAK38523	4767	4931	5962	3175	2413	4492	4549.9	4791.93	6158.71	3189.49	2411.01	4574.46
CAK38519	5520	7709	5930	2449	2688	2483	5268.61	7491.58	6125.65	2460.18	2685.78	2528.58
CAK38482	3155	4479	523	2938	4327	1102	3011.32	4352.68	540.255	2951.41	4323.43	1122.23
CAK38465	31913	13066	21302	35267	50974	44508	30459.6	12697.5	22004.8	35428	50931.9	45325.1
CAK38451	3278	5124	1651	466	275	881	3128.71	4979.48	1705.47	468.127	274.773	897.173
CAK38447	17930	13311	14924	11595	9988	13495	17113.4	12935.6	15416.4	11647.9	9979.75	13742.7
CAK38446	17747	16316	15116	17802	13141	10344	16938.8	15855.8	15614.7	17883.3	13130.1	10533.9
CAK38444	151132	163017	181579	47288	36060	39948	144249	158419	187570	47503.8	36030.2	40681.4
CAK38392	21115	17499	8744	2435	2307	3854	20153.4	17005.5	9032.49	2446.11	2305.09	3924.75
CAK38372	35609	24304	39712	43376	34022	46485	33987.3	23618.5	41022.2	43574	33993.9	47338.4
CAK38294	2244	4180	3138	2951	2973	1974	2141.8	4062.11	3241.53	2964.47	2970.54	2010.24
CAK38293	39228	25373	22393	48285	47927	41594	37441.5	24657.4	23131.8	48505.4	47887.4	42357.6
CAK38292	7358	4541	4342	13238	12401	6100	7022.9	4412.93	4485.26	13298.4	12390.8	6211.98
CAK38289	5951	9378	6226	1629	2992	3866	5679.98	9113.51	6431.42	1636.44	2989.53	3936.97
CAK38276	2729	2663	3653	4853	6521	2393	2604.72	2587.89	3773.52	4875.15	6515.61	2436.93
CAK38271	125560	116246	114176	103411	108489	128089	119842	112967	117943	103883	108399	130440
CAK38269	5649	4805	8629	6189	5388	11010	5391.74	4669.48	8913.7	6217.25	5383.55	11212.1
CAK38261	18488	7042	10052	36605	32451	35033	17646	6843.39	10383.6	36772.1	32424.2	35676.1
CAK38233	19683	19999	10175	19240	10457	14326	18786.6	19435	10510.7	19327.8	10448.4	14589
CAK38216	16149	15587	17074	13416	15594	7448	15413.5	15147.4	17637.3	13477.2	15581.1	7584.73
CAK38196	7796	11278	8540	964	1233	2466	7440.96	10959.9	8821.76	968.4	1231.98	2511.27
CAK38186	10250	7592	6185	4402	4613	3977	9783.2	7377.88	6389.06	4422.09	4609.19	4050.01
CAK38105	35515	37910	30104	22865	18801	20827	33897.6	36840.8	31097.2	22969.4	18785.5	21209.3
CAK38039	2378	4441	2416	705	696	761	2269.7	4315.75	2495.71	708.218	695.425	774.971
CAK37997	5101	7074	8803	10857	12818	17014	4868.69	6874.49	9093.44	10906.6	12807.4	17326.3
CAK37980	10433	13059	6617	2924	3872	2488	9957.86	12690.7	6835.32	2937.35	3868.8	2533.67
CAK37979	45129	51822	25939	16415	13964	20136	43073.8	50360.4	26794.8	16489.9	13952.5	20505.7
CAK37951	3063	2704	823	3248	2953	8905	2923.51	2627.74	850.153	3262.82	2950.56	9068.48
CAK37943	1975	2490	3516	2022	2278	2176	1885.06	2419.77	3632	2031.23	2276.12	2215.95
CAK37926	27972	25855	30942	37594	29441	17043	26698.1	25125.8	31962.9	37765.6	29416.7	17355.9
CAK37920	5379	5151	4141	2470	3531	2904	5134.03	5005.72	4277.62	2481.27	3528.08	2957.31
CAK37903	1231	9941	2349	1865	1509	2041	1174.94	9660.63	2426.5	1873.51	1507.75	2078.47
CAK37882	8986	7906	6584	15801	9390	14542	8576.76	7683.02	6801.23	15873.1	9382.24	14809
CAK37881	89729	68856	70642	200135	194136	190294	85642.6	66914	72972.7	201048	193976	193787
CAK37870	19096	19051	15459	17807	17854	21939	18226.3	18513.7	15969	17888.3	17839.3	22341.8
CAK37862	24388	21935	22049	34736	26394	38768	23277.3	21316.4	22776.5	34894.5	26372.2	39479.7
CAK37859	14983	26019	9116	12041	11072	18812	14300.7	25285.2	9416.77	12096	11062.9	19157.4
CAK37849	869	412	319	1218	1086	1436	829.424	400.38	329.525	1223.56	1085.1	1462.36
CAK37846	9210	6720	6098	3591	3780	3804	8790.56	6530.47	6299.19	3607.39	3776.88	3873.83
CAK37843	4978	4191	5492	4388	3634	4130	4751.29	4072.8	5673.2	4408.03	3631	4205.82
CAK37818	35121	33459	22226	34668	32440	25423	33521.5	32515.3	22959.3	34826.2	32413.2	25889.7
CAK37816	7434	7167	7122	13941	12204	19377	7095.44	6964.86	7356.98	14004.6	12193.9	19732.7
CAK37795	3623	2268	1072	5105	4264	5716	3458	2204.03	1107.37	5128.3	4260.48	5820.93
CAK37769	16754	13730	8123	7758	7856	7397	15991	13342.8	8391	7793.41	7849.51	7532.79
CAK37765	43312	39496	67001	13875	37563	19826	41339.5	38382.1	69211.6	13938.3	37532	20190
CAK37755	17165	13754	7811	15191	14427	8518	16383.3	13366.1	8068.71	15260.3	14415.1	8674.37
CAK37750	29506	22560	24308	73692	36639	26060	28162.2	21923.7	25110	74028.3	36608.7	26538.4
CAK37713	3376	4875	1576	1424	1965	1475	3222.25	4737.51	1628	1430.5	1963.38	1502.08
CAK37710	8494	14129	20588	10598	4610	12966	8107.17	13730.5	21267.3	10646.4	4606.19	13204
CAK37707	52309	63341	59795	43955	46764	38881	49926.8	61554.5	61767.8	44155.6	46725.4	39594.8
CAK37644	12114	9178	9597	13898	12628	13201	11562.3	8919.15	9913.64	13961.4	12617.6	13443.3
CAK37592	62598	58330	41320	21349	17295	18633	59747.2	56684.9	42683.3	21446.4	17280.7	18975.1
CAK37571	3877	2980	3133	4003	4739	4570	3700.44	2895.95	3236.37	4021.27	4735.09	4653.9
CAK37563	134215	114296	103633	105731	83104	142461	128103	111072	107052	106214	83035.4	145076
CAK37559	2773	2781	2303	968	648	1162	2646.71	2702.57	2378.98	972.418	647.465	1183.33
CAK37556	9740	9915	10149	4800	6197	4993	9296.42	9635.36	10483.8	4821.91	6191.88	5084.66
CAK37547	41569	47707	39342	9407	10028	9144	39675.9	46361.5	40640	9449.94	10019.7	9311.87
CAK37544	1098	789	647	4106	3872	3571	1048	766.747	668.347	4124.74	3868.8	3636.56
CAK37529	6051	6797	3941	1742	1374	1453	5775.43	6605.3	4071.03	1749.95	1372.87	1479.67
CAK37488	25225	24252	20560	33250	23806	17476	24076.2	23568	21238.3	33401.8	23786.3	17796.8
CAK37422	125919	113695	89112	83252	49758	92791	120184	110488	92052.1	83632	49716.9	94494.5
CAK37419	29202	11791	10276	17459	13309	10084	27872.1	11458.4	10615	17538.7	13298	10269.1
CAK37386	11334	10880	6396	10007	11455	11413	10817.8	10573.1	6607.02	10052.7	11445.5	11622.5
CAK37354	63170	53438	56389	58959	50243	62036	60293.1	51930.8	58249.4	59228.1	50201.5	63174.9
CAK37350	4090	6717	4618	2659	3006	1929	3903.73	6527.56	4770.36	2671.14	3003.52	1964.41
CAK37346	3589	4847	2310	843	1043	1110	3425.55	4710.3	2386.21	846.848	1042.14	1130.38
CAK37331	94838	77240	58670	91208	71338	30974	90518.9	75061.5	60605.7	91624.3	71279.1	31542.6
CAK37289	56846	70450	34999	21880	17958	25583	54257.1	68463	36153.7	21979.9	17943.2	26052.7
CAK37227	3943	4026	3577	5020	4977	6067	3763.43	3912.45	3695.02	5042.91	4972.89	6178.38
CAK37215	3960	4096	5084	5976	4512	7232	3779.66	3980.48	5251.74	6003.28	4508.27	7364.77
CAK37201	21938	17803	11561	50270	51866	24128	20938.9	17300.9	11942.4	50499.4	51823.2	24570.9
CAK37196	9699	9179	9238	9507	10479	11686	9257.29	8920.12	9542.79	9550.39	10470.3	11900.5
CAK37185	16788	14052	10443	5740	5342	5284	16023.4	13655.7	10787.5	5766.2	5337.59	5381
CAK37182	2257	3804	1560	2323	738	1427	2154.21	3696.71	1611.47	2333.6	737.39	1453.2
CAK37167	243077	223074	117315	527508	329231	146812	232007	216782	121186	529916	328959	149507
CAK37156	30179	23557	15148	11049	9814	13691	28804.6	22892.6	15647.8	11099.4	9805.89	13942.3
CAK37140	17697	29741	31980	4081	4837	6073	16891.1	28902.2	33035.1	4099.63	4833	6184.49
CAK37139	7589	7720	1269	3874	5620	3168	7243.38	7502.27	1310.87	3891.68	5615.36	3226.16
CAK37132	44779	37850	43089	36956	42342	54039	42739.7	36782.5	44510.6	37124.7	42307	55031.1
CAK37124	4973	3279	2310	1939	1978	2344	4746.52	3186.52	2386.21	1947.85	1976.37	2387.03
CAK37108	5281	6794	7468	1665	2703	2429	5040.49	6602.38	7714.39	1672.6	2700.77	2473.59
CAK37088	7123	7947	4867	5060	4054	4874	6798.61	7722.86	5027.58	5083.1	4050.65	4963.48
CAK37040	13240	13125	24050	8059	5644	3480	12637	12754.8	24843.5	8095.78	5639.34	3543.89
CAK37004	22745	11511	9141	11971	8778	5319	21709.2	11186.3	9442.59	12025.6	8770.75	5416.65
CAK36993	11509	10164	9866	22299	9836	11553	10984.9	9877.34	10191.5	22400.8	9827.88	11765.1
CAK36967	88122	73578	81577	113065	71932	89696	84108.8	71502.8	84268.5	113581	71872.6	91342.6
CAK36954	4979	5552	2070	1692	2218	1181	4752.25	5395.41	2138.3	1699.72	2216.17	1202.68
CAK36920	32509	20557	17236	63012	76724	10460	31028.5	19977.2	17804.7	63299.6	76660.6	10652
CAK36875	194298	203618	147494	216360	166985	159552	185449	197875	152360	217348	166847	162481
CAK36862	51075	72477	77809	21932	25104	54248	48749	70432.9	80376.2	22032.1	25083.3	55243.9
CAK36859	971	1186	944	1503	1037	1481	926.779	1152.55	975.146	1509.86	1036.14	1508.19

## Sheet: UP
Gene_id	Protein_Accession	Gene_Symbol	Gene_Description	Protein description	log2FoldChange	pvalue	padj
An12g09900	CAL00893	0	Has domain(s) with predicted amino acid transmembrane transporter activity, role in amino acid transmembrane transport and membrane localization	Aspergillus niger contig An12c0340, genomic contig	1.00391	0.00979213	0.023457
An09g05630	CAL00840	0	Ortholog of A. nidulans FGSC A4 : AN8200, A. fumigatus Af293 : Afu5g03310, A. oryzae RIB40 : AO090102000535, Aspergillus wentii : Aspwe1_0030105 and Aspergillus sydowii : Aspsy1_0136711	Aspergillus niger contig An09c0170, genomic contig	1.61067	0.000210893	0.000841719
An09g05420	CAL00819	0	Putative signal peptidase complex subunit; expression enhanced by maltose; expression induced by tunicamycin and DTT	Signal peptidase subunit 3 (EC 3.4.-.-)	1.23308	8.63962e-05	0.000380558
An04g02570	CAL00744	0	Ortholog(s) have role in mitochondrial respirasome assembly, mitochondrial respiratory chain complex IV assembly and integral component of mitochondrial inner membrane, mitochondrial respirasome, mitochondrion, plasma membrane localization	Respiratory supercomplex factor 1, mitochondrial	1.21362	3.85255e-05	0.000184341
An04g02460	CAL00733	0	Ortholog(s) have role in cristae formation, protein import into mitochondrial intermembrane space	MICOS complex subunit mic60 (Mitofilin)	1.0578	2.89681e-06	1.82539e-05
An17g02095	CAL00552	0	Has domain(s) with predicted peptidase activity, role in signal peptide processing and integral component of membrane, signal peptidase complex localization	Aspergillus niger contig An17c0110, genomic contig	1.67914	3.94779e-05	0.000187699
An16g07580	CAL00530	0	Ortholog of Aspergillus wentii : Aspwe1_0175365, Aspergillus versicolor : Aspve1_0433366, Aspergillus clavatus NRRL 1 : ACLA_058590 and Aspergillus niger ATCC 1015 : 55077-mRNA	Aspergillus niger contig An16c0230, genomic contig	1.44117	6.24413e-05	0.000284949
An18g05820	CAK97501	0	Ortholog of A. nidulans FGSC A4 : AN5716, A. fumigatus Af293 : Afu1g06780, A. oryzae RIB40 : AO090001000762, Aspergillus wentii : Aspwe1_0038300 and Aspergillus sydowii : Aspsy1_0043718	Aspergillus niger contig An18c0170, genomic contig	1.10392	3.38552e-06	2.09894e-05
An18g05500	CAK97468	0	Ortholog(s) have extracellular region localization	Neutral ceramidase (EC 3.5.1.23)	3.44794	0.00123459	0.00393697
An18g03780	CAK97416	0	Ortholog(s) have fungal-type vacuole membrane localization	Vacuolar membrane protease (EC 3.4.-.-) (FXNA-related family protease 1)	1.90963	1.22805e-14	3.42824e-13
An15g03910	CAK97260	0	Ortholog(s) have role in DNA repair, GPI anchor biosynthetic process, hyphal growth and endoplasmic reticulum localization	Aspergillus niger contig An15c0140, genomic contig	1.27628	2.039e-05	0.000104394
An12g04750	CAK97166	0	Ortholog(s) have role in mitochondrion inheritance, negative regulation of proteolysis, protein folding, replicative cell aging and mitochondrial inner membrane, mitochondrial membrane, mitochondrion, plasma membrane localization	Prohibitin	2.51833	1.63227e-18	8.40872e-17
An11g10100	CAK97094	0	Ortholog of S. cerevisiae : YPR063C, Aspergillus kawachii : Aspka1_0175949, Aspergillus acidus : Aspfo1_0041801 and Aspergillus carbonarius ITEM 5010 : Acar5010_001998	Aspergillus niger contig An11c0340, genomic contig	2.01788	9.69738e-07	6.73961e-06
An11g09880	CAK97072	0	Protein of unknown function; induced by growth on starch and lactate	Aspergillus niger contig An11c0340, genomic contig	1.55905	2.87372e-05	0.000141582
An07g01750	CAK96620	0	Ortholog of A. nidulans FGSC A4 : AN3529, AN4144, AN8311, AN9211, AN4846 and A. fumigatus Af293 : Afu1g17260, Afu4g07950, Afu4g09380, Afu6g00560, Afu6g12140, Afu8g01900	Aspergillus niger contig An07c0020, genomic contig	1.34783	0.00511514	0.0135527
An02g11950	CAK96424	0	Ortholog(s) have role in positive regulation of cellular response to hypoxia, regulation of protein glycosylation, sterol regulatory element binding protein cleavage and Dsc E3 ubiquitin ligase complex localization	Aspergillus niger contig An02c0380, genomic contig	1.50244	0.000252715	0.000992001
An02g02190	CAK96393	0	Ortholog(s) have role in chronological cell aging, hyphal growth, mitochondrial fission, peroxisome fission, peroxisome organization and mitochondrial outer membrane, peroxisome localization	Mitochondrial fission 1 protein	1.61023	4.10096e-12	8.06791e-11
An02g01100	CAK96326	0	Has domain(s) with predicted role in transmembrane transport and integral component of membrane localization	Aspergillus niger contig An02c0010, genomic contig	1.26267	5.39298e-05	0.000249756
An07g04180	CAK48168	0	NADH-ubiquinone oxidoreductase; respiratory-chain NADH dehydrogenase	Aspergillus niger contig An07c0100, genomic contig (EC 1.6.5.3)	1.84497	8.44485e-14	2.09945e-12
An07g01960	CAK48097	0	Putative stearoyl-CoA desaturase	Acyl-CoA desaturase (EC 1.14.19.1)	1.00385	0.00228005	0.00674167
An02g13360	CAK47749	0	Ortholog(s) have copper ion binding activity, role in cell redox homeostasis, cellular response to oxidative stress, mitochondrial respiratory chain complex IV assembly and mitochondrial inner membrane, plasma membrane localization	Aspergillus niger contig An02c0440, genomic contig	1.00214	1.56299e-05	8.24739e-05
An02g03290	CAK47609	0	Ortholog(s) have role in chromatin silencing at centromere, chromatin silencing at rDNA, chromatin silencing at subtelomere, chromosome attachment to the nuclear envelope and nuclear CENP-A containing chromatin localization	Aspergillus niger contig An02c0090, genomic contig	1.00979	0.000385757	0.00143531
An18g06490	CAK47317	0	Ortholog of A. nidulans FGSC A4 : AN10706, A. fumigatus Af293 : Afu6g06590, A. oryzae RIB40 : AO090003000031, Neosartorya fischeri NRRL 181 : NFIA_052240 and Aspergillus clavatus NRRL 1 : ACLA_088370	Aspergillus niger contig An18c0210, genomic contig	1.13154	2.29413e-06	1.47539e-05
An17g00170	CAK47145	0	Ortholog of A. nidulans FGSC A4 : AN10975, A. fumigatus Af293 : Afu5g06970, A. oryzae RIB40 : AO090701000290, Aspergillus versicolor : Aspve1_0135244 and Aspergillus clavatus NRRL 1 : ACLA_010110	Uncharacterized protein	1.3616	0.0268784	0.0552267
An16g07970	CAK47046	0	Putative ubiquitin-protein ligase; expression enhanced by maltose	Aspergillus niger contig An16c0240, genomic contig	1.14915	0.000392838	0.00145729
An16g05940	CAK46934	0	Has domain(s) with predicted electron transfer activity, heme binding, iron ion binding, oxidoreductase activity, acting on paired donors, with incorporation or reduction of molecular oxygen activity and role in oxidation-reduction process	Aspergillus niger contig An16c0190, genomic contig (EC 1.14.-.-)	1.05458	0.0325818	0.0652812
An13g00320	CAK46433	0	Ortholog(s) have role in syncytium formation by plasma membrane fusion	Aspergillus niger contig An13c0010, genomic contig	2.76783	4.464e-30	9.29443e-28
An12g04990	CAK46213	0	Has domain(s) with predicted oxidoreductase activity and role in metabolic process	Aspergillus niger contig An12c0160, genomic contig	1.72188	1.47598e-08	1.44053e-07
An11g08620	CAK46051	0	Has domain(s) with predicted role in transmembrane transport and integral component of membrane localization	Aspergillus niger contig An11c0280, genomic contig	1.34401	0.00715269	0.0179879
An08g11220	CAK45793	0	Ortholog of Aspergillus brasiliensis : Aspbr1_0533017, Aspergillus kawachii : Aspka1_0183406, Aspergillus acidus : Aspfo1_0065994 and Aspergillus wentii : Aspwe1_0046942	Aspergillus niger contig An08c0280, genomic contig	1.30296	0.000183713	0.000743935
An08g05200	CAK45492	0	Ortholog(s) have role in cellular response to cold, chromatin silencing at silent mating-type cassette, positive regulation of transcription by RNA polymerase II	Aspergillus niger contig An08c0130, genomic contig	1.35256	2.53051e-05	0.000126911
An08g05160	CAK45488	0	Ortholog(s) have delta12-fatty acid dehydrogenase activity and role in asexual sporulation resulting in formation of a cellular spore, fatty acid biosynthetic process, unsaturated fatty acid biosynthetic process	Aspergillus niger contig An08c0130, genomic contig	2.4231	4.96092e-19	2.8218e-17
An07g09960	CAK45125	0	Putative v-SNARE; expression enhanced by maltose	Aspergillus niger contig An07c0380, genomic contig	1.04393	0.00247256	0.00722536
An05g00390	CAK44859	0	Putative acetyl-CoA synthase	Aspergillus niger contig An05c0010, genomic contig (EC 6.2.1.1)	1.37754	4.13502e-06	2.50457e-05
An01g11630	CAK44065	sec61a	Putative SEC61 complex subunit; expression enhanced by maltose; expression induced by tunicamycin and DTT	Aspergillus niger contig An01c0340, genomic contig	1.58608	2.97613e-05	0.000145801
An01g05640	CAK43731	0	Ortholog of A. nidulans FGSC A4 : AN0315, A. fumigatus Af293 : Afu1g02560, Aspergillus wentii : Aspwe1_0025616, Aspergillus sydowii : Aspsy1_0145521 and Aspergillus terreus NIH2624 : ATET_04837	Aspergillus niger contig An01c0200, genomic contig	1.43246	8.96861e-07	6.26799e-06
An01g01475	CAK43520	0	Ortholog of A. fumigatus Af293 : Afu8g07235, A. oryzae RIB40 : AO090023000051, Neosartorya fischeri NRRL 181 : NFIA_100080, Aspergillus wentii : Aspwe1_0170039 and Aspergillus versicolor : Aspve1_0045698	Uncharacterized protein	1.34545	6.69112e-10	8.35888e-09
An01g01000	CAK43477	0	Ortholog of A. nidulans FGSC A4 : AN2923, AN10601, A. fumigatus Af293 : Afu2g17770, Afu8g00650, A. niger CBS 513.88 : An11g02090 and A. oryzae RIB40 : AO090020000174, AO090103000301	Aspergillus niger contig An01c0050, genomic contig	1.1238	0.00076866	0.00261292
An01g00560	CAK43444	0	Putative signal peptidase complex subunit; expression enhanced by maltose; expression induced by tunicamycin and DTT	Signal peptidase complex catalytic subunit SEC11 (EC 3.4.21.89)	1.34792	5.59705e-05	0.00025713
An18g05050	CAK43303	0	Has domain(s) with predicted integral component of membrane localization	Aspergillus niger contig An18c0160, genomic contig	2.86797	1.72266e-07	1.40198e-06
An16g08550	CAK42954	0	Ortholog(s) have proton-transporting ATP synthase activity, rotational mechanism, structural molecule activity and role in ATP synthesis coupled proton transport, cristae formation, protein complex oligomerization	ATP synthase subunit e, mitochondrial	2.35066	6.5344e-21	5.18292e-19
An16g01730	CAK42790	0	Acid phosphatase	Aspergillus niger contig An16c0060, genomic contig (EC 3.1.3.2)	2.42429	6.40987e-20	4.44862e-18
An15g02850	CAK42360	0	Ortholog of A. nidulans FGSC A4 : AN7771, A. fumigatus Af293 : Afu5g07480, A. oryzae RIB40 : AO090701000657, Aspergillus wentii : Aspwe1_0035055 and Aspergillus sydowii : Aspsy1_0046323	Uncharacterized protein	1.05933	0.0014779	0.00459842
An15g02040	CAK42307	0	Ortholog of A. nidulans FGSC A4 : AN6657, A. fumigatus Af293 : Afu6g03400, Neosartorya fischeri NRRL 181 : NFIA_049930, Aspergillus wentii : Aspwe1_0168205 and Aspergillus versicolor : Aspve1_0086179	Aspergillus niger contig An15c0100, genomic contig	1.0334	0.00197187	0.00592152
An15g01020	CAK42271	0	Cardiolipin synthase	Aspergillus niger contig An15c0070, genomic contig (EC 2.7.8.-)	1.61628	4.97796e-11	7.82228e-10
An14g05510	CAK42112	0	Has domain(s) with predicted catalytic activity and membrane localization	Aspergillus niger contig An14c0180, genomic contig	1.36549	0.000115425	0.000492553
An14g00820	CAK41881	0	Ortholog(s) have plasma membrane localization	Aspergillus niger contig An14c0020, genomic contig	1.45539	4.41161e-05	0.000207774
An14g00230	CAK41822	0	Ortholog(s) have ubiquitin-protein transferase activity, role in protein monoubiquitination, protein polyubiquitination, ubiquitin-dependent ERAD pathway and endoplasmic reticulum membrane localization	Aspergillus niger contig An14c0010, genomic contig (EC 6.3.2.19)	1.31637	1.8734e-07	1.50764e-06
An14g00110	CAK41810	0	Ortholog(s) have role in mitochondrial respiratory chain complex IV assembly and mitochondrial inner membrane localization	Cytochrome c oxidase assembly protein COX16, mitochondrial (Cytochrome c oxidase assembly protein cox16, mitochondrial)	1.51459	7.06447e-05	0.000318603
An14g00060	CAK41805	0	NADH-ubiquinone oxidoreductase	Aspergillus niger contig An14c0010, genomic contig (EC 1.6.5.3)	1.42789	2.39407e-08	2.27005e-07
An13g01920	CAK41591	0	Acetyl-CoA C-acetyltransferase, acetoacetyl-CoA thiolase	Aspergillus niger contig An13c0060, genomic contig (EC 2.3.1.9)	1.2151	3.22753e-07	2.46983e-06
An12g10400	CAK41387	0	Ortholog of A. nidulans FGSC A4 : AN8443, A. fumigatus Af293 : Afu7g00720, A. oryzae RIB40 : AO090701000239, Aspergillus wentii : Aspwe1_0119565 and Aspergillus sydowii : Aspsy1_0049797	Aspergillus niger contig An12c0350, genomic contig	1.42175	1.79309e-05	9.26584e-05
An12g02850	CAK41124	0	Thioredoxin reductase	Aspergillus niger contig An12c0080, genomic contig (EC 1.8.1.9)	1.08816	6.16411e-07	4.45761e-06
An12g00220	CAK40952	0	Putative NADH dehydrogenase chain precursor	Aspergillus niger contig An12c0010, genomic contig	1.83151	2.07454e-07	1.65071e-06
An11g09400	CAK40813	0	Ortholog(s) have ATPase activity, proton-transporting ATP synthase activity, rotational mechanism activity and role in ATP synthesis coupled proton transport	Aspergillus niger contig An11c0320, genomic contig	1.03568	0.00122096	0.00389599
An11g04810	CAK40685	aox1	Mitochondria-localized alternative oxidase; functions in a cyanide- and antimycin A-insensitive and salicylhydroxamic acid-sensitive respiratory pathway; constitutively expressed regardless of the glucose concentration	Alternative oxidase (EC 1.-.-.-)	1.62959	4.79967e-09	5.08134e-08
An11g04760	CAK40680	0	Protein of unknown function	Aspergillus niger contig An11c0180, genomic contig	1.16989	0.00044317	0.00161523
An11g02900	CAK40622	0	Has domain(s) with predicted hydrolase activity and role in metabolic process	Abhydrolase_3 domain-containing protein	1.27052	0.00293415	0.00842155
An09g04380	CAK40293	0	Ortholog of A. nidulans FGSC A4 : AN3898, A. fumigatus Af293 : Afu3g14180, A. oryzae RIB40 : AO090012000661, Aspergillus wentii : Aspwe1_0038053 and Aspergillus sydowii : Aspsy1_0034796, Aspsy1_0915433	Aspergillus niger contig An09c0110, genomic contig	3.83535	4.01836e-05	0.000190182
An08g07360	CAK39983	0	Ortholog(s) have mitochondrion targeting sequence binding, protein transmembrane transporter activity	Aspergillus niger contig An08c0170, genomic contig	1.62165	1.26268e-09	1.50398e-08
An07g07020	CAK39544	0	Ortholog of A. nidulans FGSC A4 : AN4559, A. fumigatus Af293 : Afu2g02700, Aspergillus wentii : Aspwe1_0036726, Aspergillus sydowii : Aspsy1_0047078 and Aspergillus terreus NIH2624 : ATET_06907	Aspergillus niger contig An07c0200, genomic contig	1.36707	3.15002e-07	2.42141e-06
An06g01390	CAK39207	0	NADH-ubiquinone oxidoreductase; respiratory-chain NADH dehydrogenase	Aspergillus niger contig An06c0080, genomic contig (EC 1.6.5.3)	1.2192	3.4815e-07	2.64393e-06
An06g01050	CAK39179	0	Has domain(s) with predicted role in response to stress and integral component of membrane localization	Aspergillus niger contig An06c0050, genomic contig	1.06658	0.000507904	0.00182721
An04g05750	CAK38837	0	Ortholog(s) have NADH dehydrogenase (ubiquinone) activity and role in mitochondrial respiratory chain complex I assembly, programmed cell death	NADH dehydrogenase [ubiquinone] 1 alpha subcomplex subunit 1	2.14539	4.02247e-09	4.39831e-08
An04g05310	CAK38793	0	Ortholog(s) have proton-transporting ATPase activity, rotational mechanism activity and role in cellular protein-containing complex assembly, endocytosis, polyphosphate metabolic process, vacuolar acidification, vacuole organization	V-type proton ATPase subunit a	1.00126	0.000350193	0.0013277
An04g03495	CAK38615	0	Ortholog(s) have dolichyl-diphosphooligosaccharide-protein glycotransferase activity, role in protein N-linked glycosylation and oligosaccharyltransferase complex localization	Dolichyl-diphosphooligosaccharide--protein glycosyltransferase subunit 2	1.17324	2.55022e-05	0.000127536
An04g01310	CAK38588	0	Has domain(s) with predicted structural molecule activity	Aspergillus niger contig An04c0080, genomic contig	1.17048	7.53402e-07	5.35526e-06
An04g00100	CAK38465	0	Ortholog(s) have glyoxysome localization	Aspergillus niger contig An04c0010, genomic contig	1.01499	0.00272945	0.00787475
An03g05000	CAK38292	0	Ortholog(s) have zinc ion transmembrane transporter activity, role in zinc ion transport and endoplasmic reticulum localization	Aspergillus niger contig An03c0150, genomic contig	1.00266	0.00488353	0.0130219
An03g04690	CAK38261	0	Ortholog(s) have MAP-kinase scaffold activity, osmosensor activity	High osmolarity signaling protein sho1 (Osmosensor sho1)	1.58844	4.0707e-06	2.4732e-05
An02g13670	CAK37951	0	Ortholog(s) have calcium ion transmembrane transporter activity, manganese ion transmembrane transporter activity	Aspergillus niger contig An02c0450, genomic contig	1.25531	0.0206722	0.0442774
An02g11800	CAK37881	0	Ortholog(s) have plasma membrane localization	Aspergillus niger contig An02c0370, genomic contig	1.38449	1.14212e-12	2.42299e-11
An02g09810	CAK37849	0	Has domain(s) with predicted NAD(P)+ transhydrogenase (AB-specific) activity, NAD(P)+ transhydrogenase activity, NADP binding activity and role in oxidation-reduction process, proton transmembrane transport	Proton-translocating NAD(P)(+) transhydrogenase (EC 7.1.1.1)	1.27383	0.00549189	0.0144133
An02g09350	CAK37816	0	Has domain(s) with predicted sulfate transmembrane transporter activity, role in sulfate transport and integral component of membrane localization	Aspergillus niger contig An02c0280, genomic contig	1.1007	1.58433e-05	8.35118e-05
An02g08330	CAK37795	0	Protein of unknown function; expression repressed by tunicamycin and DTT	Aspergillus niger contig An02c0260, genomic contig	1.16782	0.00447293	0.0120817
An02g02640	CAK37544	0	Ortholog(s) have Rab GTPase binding activity and Golgi apparatus localization	Protein YIP	2.2275	7.93066e-15	2.29072e-13
An01g10190	CAK37201	0	Ortholog(s) have plasma membrane localization	Sidoreflexin	1.33836	0.000124678	0.000527087
An01g03820	CAK36920	0	ARF guanine nucleotide exchange factor	Aspergillus niger contig An01c0120, genomic contig	1.13014	0.0390365	0.0761677

## Sheet: DOWN
Gene_id	Protein_Accession	Gene_Symbol	Gene_Description	Protein description	log2FoldChange	pvalue	padj
An19g00350	CAK47358	0	Calcium-transporting ATPase	Calcium-transporting ATPase (EC 7.2.2.10)	-1.5466	1.69648e-10	2.36137e-09
An19g00330	CAK47356	0	Has domain(s) with predicted role in transmembrane transport and integral component of membrane localization	Aspergillus niger contig An19c0010, genomic contig	-1.14437	0.00971897	0.0233265
An18g05910	CAK97510	0	Alpha-1,2-mannosyltransferase	GDP-Man:Man(3)GlcNAc(2)-PP-Dol alpha-1,2-mannosyltransferase (EC 2.4.1.131)	-1.9143	2.60848e-10	3.55166e-09
An18g04730	CAK43275	0	Ortholog of A. nidulans FGSC A4 : AN12104, A. fumigatus Af293 : Afu1g06071, A. oryzae RIB40 : AO090009000477, Aspergillus wentii : Aspwe1_0130432 and Aspergillus sydowii : Aspsy1_0090989	Probable lysosomal cobalamin transporter	-1.29638	8.2131e-05	0.000364483
An18g04670	CAK43269	0	Has domain(s) with predicted carbohydrate:proton symporter activity, pyrimidine nucleotide-sugar transmembrane transporter activity and role in carbohydrate transport, pyrimidine nucleotide-sugar transmembrane transport	Aspergillus niger contig An18c0160, genomic contig	-1.24198	5.15903e-05	0.000240034
An18g04000	CAK97437	0	Has domain(s) with predicted membrane localization	Aspergillus niger contig An18c0120, genomic contig	-1.20117	0.000707904	0.00242287
An18g03980	CAK97435	0	Putative glutamate carboxypeptidase II	Aspergillus niger contig An18c0120, genomic contig (EC 3.4.17.21)	-1.0331	0.046412	0.0883844
An18g02360	CAK43166	alg3	Putative mannosyltransferase, involved in N-linked glycosylation; expression induced by tunicamycin and DTT	Dol-P-Man:Man(5)GlcNAc(2)-PP-Dol alpha-1,3-mannosyltransferase (EC 2.4.1.258) (Asparagine-linked glycosylation protein 6) (Dol-P-Man-dependent alpha(1-3)-mannosyltransferase) (Dolichyl-P-Man:Man(5)GlcNAc(2)-PP-dolichyl mannosyltransferase)	-1.75877	0.0100402	0.0239337
An18g00740	CAK43149	0	Ortholog of A. nidulans FGSC A4 : AN5689, AN3244, AN1550, A. oryzae RIB40 : AO090038000176, Neosartorya fischeri NRRL 181 : NFIA_047350 and Aspergillus wentii : Aspwe1_0042514, Aspwe1_0046700, Aspwe1_0176395	Uncharacterized protein	-1.58892	0.00113406	0.00365607
An18g00260	CAK43102	0	Has domain(s) with predicted electron transfer activity, heme binding, iron ion binding, oxidoreductase activity, acting on paired donors, with incorporation or reduction of molecular oxygen activity and role in oxidation-reduction process	Aspergillus niger contig An18c0010, genomic contig (EC 1.14.-.-)	-1.90959	1.61523e-09	1.89023e-08
An17g02180	CAL00561	0	Ortholog(s) have protein-containing complex binding activity, role in endoplasmic reticulum unfolded protein response, ubiquitin-dependent ERAD pathway and endoplasmic reticulum localization	Derlin	-1.25746	0.000143187	0.000595261
An17g02030	CAK43076	0	Ortholog(s) have transferase activity, transferring acyl groups activity and role in phosphatidylinositol acyl-chain remodeling	Aspergillus niger contig An17c0100, genomic contig (EC 2.3.1.-)	-1.21613	0.00167038	0.00511766
An17g01770	CAK43073	0	Ortholog(s) have ATPase-coupled transmembrane transporter activity, role in cellular response to drug, drug transmembrane transport, export across plasma membrane and fungal-type vacuole, plasma membrane localization	Aspergillus niger contig An17c0070, genomic contig (Fragment)	-1.95346	1.89087e-13	4.41527e-12
An17g01750	CAK43071	0	Ortholog of A. fumigatus Af293 : Afu5g06090, A. oryzae RIB40 : AO090009000649, Aspergillus wentii : Aspwe1_0102491, Aspergillus sydowii : Aspsy1_0348114 and Aspergillus terreus NIH2624 : ATET_09422	Aspergillus niger contig An17c0070, genomic contig	-2.54139	2.4608e-22	2.45933e-20
An17g01710	CAK43067	0	Putative multidrug transporter	Aspergillus niger contig An17c0070, genomic contig	-1.79549	5.17143e-11	8.02535e-10
An17g01550	CAK43051	0	Ortholog(s) have potassium:proton antiporter activity, sodium:proton antiporter activity	Sodium/hydrogen exchanger	-1.93186	1.41825e-08	1.39233e-07
An16g08570	CAK42956	sttC	Oligosaccharyltransferase complex subunit; putative transmembrane protein localised in the ER; expression enhanced by maltose	Dolichyl-diphosphooligosaccharide--protein glycotransferase (EC 2.4.99.18)	-1.09557	0.00731779	0.0183385
An16g07960	CAK47045	0	Has domain(s) with predicted role in transmembrane transport and integral component of membrane localization	Aspergillus niger contig An16c0240, genomic contig	-1.57006	1.4859e-06	9.87371e-06
An16g06820	CAK42932	0	Ortholog of A. nidulans FGSC A4 : AN6059, A. fumigatus Af293 : Afu2g09470, A. oryzae RIB40 : AO090011000717, Aspergillus wentii : Aspwe1_0054380 and Aspergillus sydowii : Aspsy1_0045140	Protein YOP1	-1.43262	4.8497e-08	4.43845e-07
An16g06740	CAK42924	0	Similar to cadmium resistance protein; expression repressed by tunicamycin and DTT	Aspergillus niger contig An16c0210, genomic contig (Fragment)	-2.03558	2.10439e-15	6.78427e-14
An16g06390	CAK46973	0	Ortholog(s) have role in regulation of resting membrane potential	Aspergillus niger contig An16c0200, genomic contig	-1.52339	6.9116e-08	6.16736e-07
An16g04430	CAK46860	0	Ortholog(s) have enzyme activator activity, heme binding activity, role in ergosterol biosynthetic process, regulation of ergosterol biosynthetic process and endoplasmic reticulum, endosome localization	Aspergillus niger contig An16c0160, genomic contig	-1.68383	1.30682e-08	1.29055e-07
An16g04350	CAK46852	0	Ortholog of A. nidulans FGSC A4 : AN4945, A. fumigatus Af293 : Afu3g10420, A. oryzae RIB40 : AO090003000591, Aspergillus wentii : Aspwe1_0049222 and Aspergillus sydowii : Aspsy1_0029595	Uncharacterized protein	-1.82094	4.01235e-10	5.22129e-09
An16g04090	CAK42881	0	Has domain(s) with predicted role in lipid storage	Aspergillus niger contig An16c0150, genomic contig	-1.93436	1.55843e-10	2.19557e-09
An16g02850	CAK48594	0	Putative beta-glucanase	Aspergillus niger contig An16c0100, genomic contig	-2.08503	3.6495e-12	7.20813e-11
An16g01290	CAK42746	0	Ortholog of A. niger CBS 513.88 : An02g05930, A. oryzae RIB40 : AO090023000658, Neosartorya fischeri NRRL 181 : NFIA_074480 and Aspergillus terreus NIH2624 : ATET_04209	Aspergillus niger contig An16c0050, genomic contig	-1.67149	0.000579529	0.00203937
An15g07810	CAK42668	agsB	Putative alpha-glucan synthase	Alpha-1,3-glucan synthase (EC 2.4.1.183)	-1.18722	0.00251547	0.00732934
An15g07800	CAK42667	agtC	Putative alpha-glucanotransferase	Alpha-amylase (EC 3.2.1.1)	-1.44612	5.01601e-06	2.97684e-05
An15g06820	CAK42634	0	Ortholog of A. nidulans FGSC A4 : AN7348, A. fumigatus Af293 : Afu2g16420, A. oryzae RIB40 : AO090102000221, Aspergillus wentii : Aspwe1_0108539 and Aspergillus sydowii : Aspsy1_0027034	Aspergillus niger contig An15c0220, genomic contig	-1.03205	9.45219e-05	0.000411076
An15g05960	CAK42549	0	Ortholog of A. nidulans FGSC A4 : AN10271, A. fumigatus Af293 : Afu2g15710, A. oryzae RIB40 : AO090012000254, Aspergillus clavatus NRRL 1 : ACLA_074660 and Aspergillus niger ATCC 1015 : 200760-mRNA	Aspergillus niger contig An15c0200, genomic contig	-1.25253	0.000235494	0.000930247
An15g05750	CAK42528	0	Has domain(s) with predicted inositol phosphoceramide synthase regulator activity and role in inositol phosphoceramide metabolic process	Aspergillus niger contig An15c0200, genomic contig	-1.74005	3.66145e-13	8.27885e-12
An15g05290	CAK42502	0	Ortholog(s) have role in secondary metabolite biosynthetic process	Aspergillus niger contig An15c0180, genomic contig	-2.86171	2.06778e-29	3.97411e-27
An15g03940	CAK97262	0	Putative monosaccharide transporter; AmyR dependant induction on maltose	Aspergillus niger contig An15c0140, genomic contig	-2.29231	1.85354e-12	3.81159e-11
An15g03530	CAK42428	0	Has domain(s) with predicted catalytic activity and role in metabolic process	Aspergillus niger contig An15c0130, genomic contig (EC 3.1.4.1) (EC 3.6.1.9)	-2.45791	6.67254e-18	3.11614e-16
An15g03150	CAK42390	0	Ortholog(s) have stretch-activated, cation-selective, calcium channel activity, role in calcium ion transmembrane transport, cell volume homeostasis, cellular calcium ion homeostasis and perinuclear endoplasmic reticulum localization	Mechanosensitive ion channel protein	-2.40016	3.36503e-13	7.64321e-12
An15g01510	CAL00965	0	Ortholog(s) have role in endocytosis, phospholipid translocation, retrograde vesicle-mediated transport, Golgi to endoplasmic reticulum, vacuole organization	Phospholipid-transporting ATPase (EC 7.6.2.1)	-1.17851	1.71828e-05	8.92542e-05
An15g01350	CAL00949	0	Has domain(s) with predicted integral component of membrane localization	Aspergillus niger contig An15c0090, genomic contig	-1.37052	0.000551544	0.00195466
An15g01130	CAK42282	0	Protein similar to brefeldin A resistance protein Bfr1 of S. pombe	Aspergillus niger contig An15c0080, genomic contig	-3.31218	5.94421e-16	2.10661e-14
An15g00970	CAK42267	0	Has domain(s) with predicted role in regulation of store-operated calcium entry and integral component of endoplasmic reticulum membrane localization	Store-operated calcium entry-associated regulatory factor (Transmembrane protein 66)	-1.08095	0.00154654	0.00478813
An15g00400	CAK42209	0	Ortholog of A. nidulans FGSC A4 : AN6524, A. fumigatus Af293 : Afu6g04930, A. oryzae RIB40 : AO090701000045, Aspergillus wentii : Aspwe1_0036161 and Aspergillus sydowii : Aspsy1_0037126	Aspergillus niger contig An15c0030, genomic contig	-1.26218	0.000143624	0.000596583
An14g04140	CAK46650	0	Ortholog of A. nidulans FGSC A4 : AN2318, A. fumigatus Af293 : Afu5g10580, A. oryzae RIB40 : AO090010000479, Aspergillus wentii : Aspwe1_0106828 and Aspergillus sydowii : Aspsy1_0026806	Aspergillus niger contig An14c0130, genomic contig	-2.09013	1.75437e-09	2.0352e-08
An14g03810	CAK46618	0	Has domain(s) with predicted oxidoreductase activity and role in metabolic process	Aspergillus niger contig An14c0130, genomic contig	-1.40753	1.26335e-08	1.25506e-07
An14g03580	CAK46595	0	Ortholog of A. fumigatus Af293 : Afu2g01740, A. oryzae RIB40 : AO090011000423, Aspergillus wentii : Aspwe1_0112466, Aspergillus sydowii : Aspsy1_0091287 and Aspergillus terreus NIH2624 : ATET_05746	Aspergillus niger contig An14c0130, genomic contig	-1.10248	0.00476519	0.0127471
An14g03520	CAK46589	dfgC	Putative endomannanase; induced by caspofungin	Mannan endo-1,6-alpha-mannosidase (EC 3.2.1.101)	-1.85782	3.12831e-14	8.35945e-13
An14g03420	CAK46579	0	Has domain(s) with predicted cysteine-type endopeptidase activity, role in CAAX-box protein processing and membrane localization	Aspergillus niger contig An14c0130, genomic contig	-1.07648	0.00397095	0.0108967
An14g03290	CAK46566	0	Ortholog(s) have role in secondary metabolite biosynthetic process	Aspergillus niger contig An14c0130, genomic contig	-1.53583	3.78939e-09	4.18004e-08
An14g03100	CAK46547	0	Has domain(s) with predicted transferase activity, transferring hexosyl groups activity, role in carbohydrate metabolic process and membrane localization	Aspergillus niger contig An14c0130, genomic contig	-1.18774	0.00901765	0.0218732
An14g03020	CAK46539	0	Ortholog(s) have phospholipid scramblase activity, voltage-gated calcium channel activity, role in ion transmembrane transport, phospholipid translocation and integral component of membrane localization	Aspergillus niger contig An14c0130, genomic contig	-1.74159	3.91067e-05	0.000186644
An14g02990	CAK46536	0	Ortholog of A. nidulans FGSC A4 : AN3190, A. fumigatus Af293 : Afu4g02920, A. oryzae RIB40 : AO090001000192, Aspergillus wentii : Aspwe1_0061505 and Aspergillus sydowii : Aspsy1_1159424	Endoplasmic reticulum junction formation protein lunapark	-1.23229	1.52856e-05	8.07422e-05
An14g02290	CAK41966	0	Has domain(s) with predicted ATPase-coupled cation transmembrane transporter activity, metal ion binding, nucleotide binding activity, role in cation transport and integral component of membrane localization	Aspergillus niger contig An14c0100, genomic contig (EC 3.6.3.9)	-2.0378	1.27887e-13	3.04311e-12
An14g02090	CAK41946	0	Ortholog of Aspergillus wentii : Aspwe1_0739269, Aspergillus versicolor : Aspve1_0088438, Aspergillus sydowii : Aspsy1_0071565 and Aspergillus brasiliensis : Aspbr1_0220682	Uncharacterized protein	-1.36004	6.10419e-11	9.25859e-10
An14g01960	CAK41933	0	Ortholog of A. nidulans FGSC A4 : AN7165, A. fumigatus Af293 : Afu4g03330, A. oryzae RIB40 : AO090011000165, Aspergillus wentii : Aspwe1_0053298 and Aspergillus sydowii : Aspsy1_0060563	Aspergillus niger contig An14c0090, genomic contig	-1.0438	0.00144762	0.00453242
An14g00950	CAK41894	0	Ortholog(s) have ferric-chelate reductase activity, role in copper ion import, iron ion transport and plasma membrane localization	Aspergillus niger contig An14c0030, genomic contig (EC 1.6.99.-)	-2.21463	2.49126e-15	7.82946e-14
An13g04080	CAK41799	0	Ortholog(s) have catalytic activity and role in steroid metabolic process	Aspergillus niger contig An13c0140, genomic contig	-1.68584	0.0205792	0.044097
An13g03650	CAK41761	0	Ortholog(s) have basic amino acid transmembrane transporter activity, role in basic amino acid transport and eisosome localization	Aspergillus niger contig An13c0110, genomic contig	-1.95977	2.54332e-05	0.000127345
An13g02410	CAK41640	0	Has domain(s) with predicted metal ion transmembrane transporter activity, role in metal ion transport, transmembrane transport and membrane localization	Aspergillus niger contig An13c0080, genomic contig	-2.07036	1.36924e-13	3.2427e-12
An13g00790	CAK41480	0	Protein of unknown function	Aspergillus niger contig An13c0040, genomic contig	-1.469	8.28318e-07	5.83795e-06
An13g00740	CAK41475	0	Ortholog(s) have methyltransferase activity, role in cellular response to biotic stimulus, filamentous growth, glucosylceramide biosynthetic process, pathogenesis and plasma membrane localization	Aspergillus niger contig An13c0040, genomic contig (EC 2.1.1.79)	-1.0529	4.45734e-06	2.67708e-05
An13g00040	CAK46407	0	1-acylglycerol-3-phosphate acyltransferase	Diacylglycerol O-acyltransferase (EC 2.3.1.20)	-1.07092	0.00138936	0.00436917
An12g10360	CAK41383	0	Ortholog of A. nidulans FGSC A4 : AN5372, AN7785, A. fumigatus Af293 : Afu5g07450, Afu6g14060, A. niger CBS 513.88 : An08g08280, An15g02880 and A. oryzae RIB40 : AO090103000388, AO090701000652, AO090010000610	Aspergillus niger contig An12c0350, genomic contig	-1.46907	6.59557e-10	8.28092e-09
An12g10280	CAL00928	0	Ortholog of A. nidulans FGSC A4 : AN8361, A. fumigatus Af293 : Afu2g00370, A. oryzae RIB40 : AO090701000625, Aspergillus wentii : Aspwe1_0168024 and Aspergillus sydowii : Aspsy1_0049880	Aspergillus niger contig An12c0340, genomic contig	-1.61118	1.1276e-05	6.1446e-05
An12g09560	CAL00861	0	Ortholog(s) have catalytic activity and role in sterigmatocystin biosynthetic process	Aspergillus niger contig An12c0340, genomic contig (EC 1.14.-.-)	-3.12178	4.5846e-40	2.29092e-37
An12g08790	CAK41329	0	Ortholog(s) have glycolipid floppase activity, phosphatidylcholine flippase activity, phosphatidylethanolamine flippase activity	Phospholipid-transporting ATPase (EC 7.6.2.1)	-1.83696	7.56543e-15	2.21489e-13
An12g08560	CAK41306	0	Ortholog of A. nidulans FGSC A4 : AN8498, AN5429, AN8310, AN11121, A. fumigatus Af293 : Afu3g01350 and A. niger CBS 513.88 : An09g02370, An13g02790, An13g02620	Aspergillus niger contig An12c0290, genomic contig (EC 3.4.-.-)	-1.00816	2.29144e-05	0.000116483
An12g07730	CAK41223	0	Has domain(s) with predicted copper ion transmembrane transporter activity, role in copper ion transmembrane transport and integral component of membrane localization	Copper transporter	-1.13546	0.0015965	0.00492149
An12g07720	CAK41222	0	Putative ferric (and cupric) reductase	Aspergillus niger contig An12c0250, genomic contig (EC 1.16.1.7)	-1.33604	5.11227e-06	3.02678e-05
An12g07570	CAK46381	sncA	Predicted vesicular SNARE, involved in vesicular transport	Aspergillus niger contig An12c0230, genomic contig	-1.21132	0.00575553	0.0149908
An12g05750	CAK46283	0	Putative inorganic phosphate transport protein	Aspergillus niger contig An12c0160, genomic contig	-2.22299	8.97962e-18	4.15474e-16
An12g04600	CAK97150	0	Ortholog(s) have role in cellular copper ion homeostasis and plasma membrane localization	Aspergillus niger contig An12c0130, genomic contig	-1.27554	4.23361e-06	2.55653e-05
An12g04000	CAK46170	0	Has domain(s) with predicted zinc ion binding activity	Aspergillus niger contig An12c0110, genomic contig	-2.15688	2.46677e-05	0.000124009
An12g03150	CAK46088	0	Similar to multidrug resistance protein; expression induced by tunicamycin and DTT	Aspergillus niger contig An12c0090, genomic contig	-2.83851	2.95183e-21	2.45838e-19
An12g01890	CAK48471	0	Protein similar to squalene synthase	Squalene synthase (EC 2.5.1.21)	-1.0462	6.03422e-06	3.50209e-05
An12g01640	CAK48447	0	Protein of unknown function	Aspergillus niger contig An12c0060, genomic contig	-1.13243	0.00129468	0.00411024
An12g01460	CAK48429	0	Ortholog(s) have role in pigment biosynthetic process, response to light stimulus	Aspergillus niger contig An12c0060, genomic contig	-2.33828	2.35184e-24	3.35776e-22
An12g01360	CAK48420	0	Has domain(s) with predicted electron transfer activity, heme binding, iron ion binding, oxidoreductase activity, acting on paired donors, with incorporation or reduction of molecular oxygen activity and role in oxidation-reduction process	Aspergillus niger contig An12c0060, genomic contig (EC 1.14.-.-)	-1.59212	3.62268e-10	4.80173e-09
An12g01190	CAK41049	ssoA	Predicted plasma membrane t-SNARE involved in vesicular transport	Aspergillus niger contig An12c0040, genomic contig	-1.33474	2.14309e-07	1.69985e-06
An12g00580	CAK40987	0	Ortholog of A. nidulans FGSC A4 : AN9101, A. fumigatus Af293 : Afu7g02090, A. oryzae RIB40 : AO090038000586, Aspergillus wentii : Aspwe1_0158097 and Aspergillus sydowii : Aspsy1_0061410	Aspergillus niger contig An12c0030, genomic contig	-1.72453	9.73871e-05	0.000422067
An11g10790	CAK40877	0	Ortholog of A. oryzae RIB40 : AO090020000049, Neosartorya fischeri NRRL 181 : NFIA_071420, Aspergillus versicolor : Aspve1_0129037 and Aspergillus clavatus NRRL 1 : ACLA_033780	Aspergillus niger contig An11c0380, genomic contig	-1.66665	3.38443e-11	5.4909e-10
An11g09890	CAK97073	0	Ortholog(s) have dolichyl-phosphate-mannose-protein mannosyltransferase activity, mannosyltransferase activity	Dolichyl-phosphate-mannose--protein mannosyltransferase (EC 2.4.1.109)	-1.43044	7.47362e-07	5.3199e-06
An11g09240	CAK97054	0	Putative GPI-anchored aspartic protease	Aspergillus niger contig An11c0300, genomic contig (EC 3.4.23.-)	-1.00531	1.64633e-05	8.63243e-05
An11g08930	CAK97025	0	Ortholog(s) have role in positive regulation of transcription by RNA polymerase II, short-chain fatty acid catabolic process	Aspergillus niger contig An11c0300, genomic contig	-1.31071	2.51623e-07	1.96462e-06
An11g07780	CAK45972	0	Has domain(s) with predicted ATP binding, ATPase activity, ATPase-coupled transmembrane transporter activity, nucleoside-triphosphatase activity, nucleotide binding activity and role in transmembrane transport	Aspergillus niger contig An11c0270, genomic contig	-2.15707	4.90944e-07	3.60242e-06
An11g07660	CAK45960	0	Putative glucan exo-1,3-beta-glucosidase	Probable glucan 1,3-beta-glucosidase D (EC 3.2.1.58) (Exo-1,3-beta-glucanase D)	-1.71701	8.22823e-11	1.22007e-09
An11g05680	CAK40725	0	Has domain(s) with predicted electron transfer activity, heme binding, iron ion binding, oxidoreductase activity, acting on paired donors, with incorporation or reduction of molecular oxygen activity and role in oxidation-reduction process	Aspergillus niger contig An11c0220, genomic contig	-1.19776	8.08238e-07	5.71254e-06
An11g04370	CAK40669	0	Cytochrome b5	Aspergillus niger contig An11c0160, genomic contig	-1.02697	0.00137877	0.0043386
An11g02990	CAK40631	0	Protein with similarity to cytochrome P450; expression induced by tunicamycin and DTT	Aspergillus niger contig An11c0110, genomic contig (EC 1.14.-.-)	-1.60079	1.8911e-06	1.23527e-05
An11g02600	CAK40602	0	Ortholog(s) have glycerophosphodiester transmembrane transporter activity and role in glycerophosphodiester transmembrane transport	Aspergillus niger contig An11c0090, genomic contig	-2.11737	1.33967e-20	9.99158e-19
An11g01260	CAK45863	0	Has domain(s) with predicted metal ion transmembrane transporter activity, role in metal ion transport, transmembrane transport and membrane localization	Aspergillus niger contig An11c0050, genomic contig	-2.00118	3.27197e-11	5.34314e-10
An11g01240	CAK45861	0	Has domain(s) with predicted catalytic activity	Mannan endo-1,6-alpha-mannosidase (EC 3.2.1.101)	-2.50948	2.42669e-09	2.73112e-08
An11g00990	CAK96890	0	Ceramide synthase	Aspergillus niger contig An11c0040, genomic contig	-2.46299	4.51728e-12	8.7832e-11
An10g00830	CAK40519	0	Ortholog of A. oryzae RIB40 : AO090701000317, Neosartorya fischeri NRRL 181 : NFIA_032720, Aspergillus wentii : Aspwe1_0113630 and Aspergillus clavatus NRRL 1 : ACLA_093900	Aspergillus niger contig An10c0050, genomic contig	-1.82192	1.382e-11	2.46638e-10
An10g00400	CAK49130	gelA	Putative 1,3-beta-glucanosyltransferase; predicted signal peptide secretion sequence; induced by caspofungin; expressed during germination	1,3-beta-glucanosyltransferase (EC 2.4.1.-)	-2.52943	9.4408e-21	7.3712e-19
An09g06730	CAK40466	0	Has domain(s) with predicted role in amino acid transport, transmembrane transport and integral component of membrane, membrane localization	Aspergillus niger contig An09c0220, genomic contig	-2.12163	2.05609e-09	2.34572e-08
An09g05490	CAL00825	0	p24 family protein; expression enhanced by maltose	Aspergillus niger contig An09c0170, genomic contig	-1.10631	0.000199622	0.000801212
An09g04890	CAK40343	0	Ortholog(s) have SNAP receptor activity, role in endocytosis, vesicle fusion and SNARE complex, cell septum, endosome, trans-Golgi network localization	Aspergillus niger contig An09c0140, genomic contig	-1.13577	0.000269806	0.00104757
An09g04860	CAK40340	0	Has domain(s) with predicted DNA binding, zinc ion binding activity, role in transcription, DNA-templated and nucleus localization	Aspergillus niger contig An09c0140, genomic contig	-2.09688	1.76454e-11	3.0616e-10
An09g04690	CAK40323	0	Ortholog of A. fumigatus Af293 : Afu1g17280, A. niger CBS 513.88 : An04g08290, An09g01490, A. oryzae RIB40 : AO090701000484, AO090009000441 and Neosartorya fischeri NRRL 181 : NFIA_008090	Aspergillus niger contig An09c0130, genomic contig	-2.34301	1.90843e-06	1.24334e-05
An09g04010	CAK96843	chsB	Putative chitin synthase, class III; induced by caspofungin	Chitin synthase (EC 2.4.1.16)	-1.55178	7.79596e-08	6.89011e-07
An09g03250	CAK40264	0	Ortholog of A. nidulans FGSC A4 : AN7777, A. fumigatus Af293 : Afu2g00310, A. oryzae RIB40 : AO090701000622, Aspergillus sydowii : Aspsy1_0153492 and Aspergillus terreus NIH2624 : ATET_08410	Aspergillus niger contig An09c0080, genomic contig	-2.16183	5.11448e-11	8.01161e-10
An09g03210	CAK40260	0	Has domain(s) with predicted electron transfer activity, heme binding, iron ion binding, oxidoreductase activity, acting on paired donors, with incorporation or reduction of molecular oxygen activity and role in oxidation-reduction process	Aspergillus niger contig An09c0080, genomic contig (EC 1.14.13.12)	-1.27424	0.0032458	0.00917379
An09g03160	CAK40255	0	Has domain(s) with predicted ATP binding, ATPase-coupled cation transmembrane transporter activity, ATPase-coupled intramembrane lipid transporter activity, magnesium ion binding, metal ion binding, nucleotide binding activity	Phospholipid-transporting ATPase (EC 7.6.2.1)	-1.54559	1.2127e-09	1.45321e-08
An09g02930	CAK40230	0	Has domain(s) with predicted transmembrane transporter activity, role in transmembrane transport and integral component of membrane, membrane localization	Aspergillus niger contig An09c0070, genomic contig	-2.7416	6.30199e-09	6.50641e-08
An09g02290	CAK40166	chsD	Chitin synthase	Chitin synthase (EC 2.4.1.16)	-1.9868	1.72929e-19	1.05381e-17
An09g01840	CAK40122	0	Salicylate hydroxylase	FAD-dependent monooxygenase orf3 (EC 1.-.-.-) (Pestalamide A biosynthesis cluster protein orf3)	-1.81352	9.72864e-16	3.32973e-14
An08g09610	CAK96739	agnD	Alpha-1,3-glucanase	Aspergillus niger contig An08c0230, genomic contig (EC 3.2.1.-)	-1.48063	1.27656e-07	1.07681e-06
An08g08060	CAK45697	0	Has domain(s) with predicted N,N-dimethylaniline monooxygenase activity, NADP binding, flavin adenine dinucleotide binding, oxidoreductase activity and role in oxidation-reduction process	Aspergillus niger contig An08c0210, genomic contig (EC 1.14.13.8)	-1.19822	8.65147e-05	0.000380558
An08g07020	CAK39949	0	Putative mannosyltransferase; expression enhanced by maltose	Mannosyltransferase (EC 2.4.1.-)	-1.14297	0.000161399	0.000661616
An08g04100	CAK39912	0	Serine palmitoyltransferase	Aspergillus niger contig An08c0110, genomic contig (EC 2.3.1.50)	-1.63249	0.00587886	0.0152369
An08g03960	CAK39899	0	Putative glycoprotein cargo receptor; expression enhanced by maltose; expression induced by tunicamycin and DTT	Aspergillus niger contig An08c0110, genomic contig	-1.03427	0.000495042	0.00178608
An08g03640	CAK45401	0	Has domain(s) with predicted role in transmembrane transport and integral component of membrane localization	Aspergillus niger contig An08c0100, genomic contig	-2.18689	2.78326e-11	4.63598e-10
An07g09840	CAK39750	0	Has domain(s) with predicted role in transmembrane transport and integral component of membrane localization	Aspergillus niger contig An07c0370, genomic contig	-1.61422	1.42967e-12	2.98916e-11
An07g09810	CAK39747	0	Has domain(s) with predicted hydrolase activity	Aspergillus niger contig An07c0370, genomic contig	-1.42295	0.0023327	0.00687699
An07g09570	CAK39722	0	Protein similar to phosphatidate cytidylyltransferase	Phosphatidate cytidylyltransferase (EC 2.7.7.41)	-2.27747	1.37194e-07	1.14642e-06
An07g09170	CAK39682	0	Has domain(s) with predicted ATP binding, ATPase activity, nucleoside-triphosphatase activity, nucleotide binding activity and membrane localization	Aspergillus niger contig An07c0320, genomic contig	-1.24318	7.38473e-06	4.2077e-05
An07g07830	CAK39599	0	Ortholog(s) have role in endoplasmic reticulum to Golgi vesicle-mediated transport	Aspergillus niger contig An07c0220, genomic contig	-1.85207	3.02376e-11	4.99613e-10
An07g07670	CAK39583	0	Ortholog of A. nidulans FGSC A4 : AN4508/bxiA, A. fumigatus Af293 : Afu2g03220, A. oryzae RIB40 : AO090120000264, Aspergillus wentii : Aspwe1_0172263 and Aspergillus sydowii : Aspsy1_0213187	Aspergillus niger contig An07c0220, genomic contig	-1.07018	0.000166858	0.000681199
An07g07520	CAK39567	0	Glycerophosphatase, alkaline phosphatase; nucleoside triphosphatase	Alkaline phosphatase (EC 3.1.3.1)	-1.91728	1.84732e-14	5.04431e-13
An07g07500	CAK39565	0	Ortholog(s) have ATPase-coupled phytochelatin transmembrane transporter activity, ATPase-coupled transmembrane transporter activity	Aspergillus niger contig An07c0220, genomic contig	-1.50277	4.42525e-07	3.29062e-06
An07g07340	CAL00776	0	ER retention HDEL-receptor; expression enhanced by maltose	Aspergillus niger contig An07c0210, genomic contig	-1.75611	0.000418788	0.00153874
An07g06990	CAK39541	0	Ortholog of A. nidulans FGSC A4 : AN4556, A. fumigatus Af293 : Afu2g02670, A. oryzae RIB40 : AO090026000612, Aspergillus wentii : Aspwe1_0036732 and Aspergillus sydowii : Aspsy1_0154947	Aspergillus niger contig An07c0190, genomic contig	-1.56196	2.5381e-09	2.85008e-08
An07g06190	CAK48989	0	Has domain(s) with predicted zinc ion binding activity	Aspergillus niger contig An07c0160, genomic contig	-3.13817	2.137e-33	5.62032e-31
An07g05820	CAK48953	0	Ortholog of A. nidulans FGSC A4 : AN4578/usgS, A. fumigatus Af293 : Afu2g02010/usgS, A. oryzae RIB40 : AO090011000471, Aspergillus wentii : Aspwe1_0173282 and Aspergillus sydowii : Aspsy1_0059300	Aspergillus niger contig An07c0160, genomic contig	-1.78388	1.50286e-16	5.86701e-15
An07g05570	CAK39472	chsA	Chitin synthase class II	Chitin synthase (EC 2.4.1.16)	-1.79746	3.69762e-07	2.79531e-06
An07g05510	CAK39467	0	Has domain(s) with predicted oxidoreductase activity and role in oxidation-reduction process	Aspergillus niger contig An07c0150, genomic contig (EC 1.16.1.7)	-1.14622	4.00079e-05	0.000189677
An07g05500	CAK39466	0	Ortholog(s) have role in aerobic respiration, hyphal growth, spore germination, sporocarp development involved in sexual reproduction	Copper transporter (Fragment)	-1.81178	4.49992e-07	3.33622e-06
An07g04650	CAK39383	bgtC	Glucan endo-1,3-beta-D-glucosidase; expressed in dormant conidia	Putative glucan endo-1,3-beta-glucosidase btgC (EC 3.2.1.39) (Endo-1,3-beta-glucanase btgC) (Laminarinase btgC)	-1.38655	1.65699e-05	8.67013e-05
An07g02870	CAL00221	0	Ortholog(s) have role in bipolar cellular bud site selection, cellular bud site selection, hyphal growth and cell surface, cellular bud neck, cellular bud scar, hyphal tip, plasma membrane localization	Aspergillus niger contig An07c0080, genomic contig	-2.48982	4.53482e-15	1.37336e-13
An06g01550	CAK47999	fksA	Beta-1,3-glucan synthase	1,3-beta-glucan synthase component FKS1 (EC 2.4.1.34) (1,3-beta-D-glucan-UDP glucosyltransferase)	-1.16639	0.000325366	0.00124491
An06g01500	CAK47994	atg9	Transmembrane protein; predicted role in autophagy	Autophagy-related protein 9	-1.91271	0.000457305	0.00166193
An06g01200	CAK39192	0	Conserved endosomal membrane protein; expression enhanced by maltose	Transmembrane 9 superfamily member	-2.1464	4.04881e-13	9.11346e-12
An06g00770	CAK44984	0	Ortholog(s) have role in asperfuranone biosynthetic process	Aspergillus niger contig An06c0040, genomic contig	-2.40281	1.45852e-07	1.20666e-06
An06g00300	CAK44946	ugtB	Putative UDP-galactofuranose transporter involved in import of UDP-galactofuranose into the Golgi lumen	Aspergillus niger contig An06c0020, genomic contig	-1.87228	3.23152e-08	3.0183e-07
An06g00280	CAK44944	0	Ortholog of S. cerevisiae : YBR096W, A. nidulans FGSC A4 : AN7874, AN10158, A. fumigatus Af293 : Afu1g12200, Afu3g00570, Afu8g02315 and A. niger CBS 513.88 : An08g04520, An16g02300	Aspergillus niger contig An06c0020, genomic contig	-1.57067	6.86136e-09	7.02586e-08
An05g01770	CAK96512	0	Protein of unknown function; expression repressed by tunicamycin and DTT	Uncharacterized protein	-1.81788	3.17088e-14	8.42812e-13
An05g01750	CAK96510	0	Ortholog of A. fumigatus Af293 : Afu6g14040/och2, A. oryzae RIB40 : AO090003001503, Neosartorya fischeri NRRL 181 : NFIA_059930 and Aspergillus niger ATCC 1015 : 189528-mRNA	Aspergillus niger contig An05c0050, genomic contig (EC 2.4.-.-)	-1.13018	0.000877234	0.00293213
An05g01070	CAK39143	0	Ortholog(s) have role in regulation of phospholipid translocation and plasma membrane localization	Aspergillus niger contig An05c0040, genomic contig	-2.2469	1.91072e-17	8.37531e-16
An05g00670	CAK39104	0	Ortholog(s) have role in cellular response to biotic stimulus, filamentous growth, filamentous growth of a population of unicellular organisms in response to biotic stimulus, vacuole inheritance	Aspergillus niger contig An05c0030, genomic contig	-2.38889	4.60143e-11	7.32272e-10
An04g09890	CAK39048	agsA	Putative 1,3-alpha-glucan synthase; induced in the presence of cell wall stress-inducing compounds such as Calcofluor White, SDS, and caspofungin	Alpha-1,3-glucan synthase (EC 2.4.1.183)	-1.64655	7.47184e-16	2.59283e-14
An04g07070	CAK44707	0	Ortholog(s) have nicotinamide riboside transmembrane transporter activity, nucleobase transmembrane transporter activity, nucleoside transmembrane transporter activity	Aspergillus niger contig An04c0200, genomic contig	-2.92115	1.68806e-19	1.04139e-17
An04g06840	CAK44684	0	Ca2+/phospholipid-transporting ATPase	Phospholipid-transporting ATPase (EC 7.6.2.1)	-3.16981	5.75113e-14	1.45143e-12
An04g06650	CAK44668	0	Ortholog(s) have 3-hydroxyacyl-CoA dehydratase activity, enoyl-CoA hydratase activity and role in fatty acid elongation, sphingolipid biosynthetic process, vacuolar transport	Very-long-chain (3R)-3-hydroxyacyl-CoA dehydratase (EC 4.2.1.134)	-1.81919	4.5469e-06	2.72432e-05
An04g05980	CAK38859	0	Ortholog(s) have SNAP receptor activity and role in Golgi to vacuole transport, intra-Golgi vesicle-mediated transport, macroautophagy, vacuole fusion, non-autophagic, vesicle fusion	t-SNARE coiled-coil homology domain-containing protein	-1.21349	4.20217e-07	3.14022e-06
An04g05530	CAK38815	0	Ortholog(s) have metallopeptidase activity, role in ascospore wall assembly and ascospore wall, endoplasmic reticulum membrane localization	Aspergillus niger contig An04c0170, genomic contig	-1.30052	2.4587e-05	0.000123727
An04g03120	CAK44628	0	Ortholog(s) have role in heme a biosynthetic process	Protoheme IX farnesyltransferase, mitochondrial (EC 2.5.1.-) (Heme O synthase)	-1.05145	0.00297759	0.00852204
An04g02250	CAL00712	0	Protein of unknown function; expression induced by tunicamycin and DTT	Aspergillus niger contig An04c0100, genomic contig	-3.31545	3.09922e-38	1.1062e-35
An04g02150	CAL00702	0	Ortholog(s) have L-arginine transmembrane transporter activity, L-histidine transmembrane transporter activity, L-lysine transmembrane transporter activity	Aspergillus niger contig An04c0100, genomic contig	-2.1687	2.96454e-10	3.9822e-09
An04g02140	CAL00701	0	Ortholog(s) have pyruvate transmembrane transporter activity, role in mitochondrial pyruvate transmembrane transport and integral component of mitochondrial inner membrane localization	Mitochondrial pyruvate carrier	-1.02814	3.3219e-05	0.000161631
An04g02050	CAL00692	0	Ortholog(s) have unfolded protein binding activity	Aspergillus niger contig An04c0100, genomic contig	-1.00122	7.57165e-05	0.000337817
An04g02020	CAL00689	cypB	ER peptidyl-prolyl cis-trans isomerase; cyclophilin; has a functional endoplasmic reticulum (ER) retention sequence	Peptidyl-prolyl cis-trans isomerase (PPIase) (EC 5.2.1.8)	-1.32109	7.19799e-06	4.10598e-05
An04g00630	CAK38519	0	Ortholog of Aspergillus tubingensis : Asptu1_0128464, Aspergillus brasiliensis : Aspbr1_0056043, Aspergillus glaucus : Aspgl1_0072446 and Aspergillus acidus : Aspfo1_0185607	Aspergillus niger contig An04c0040, genomic contig	-1.29915	8.94066e-08	7.79694e-07
An03g06940	CAK38451	0	Ortholog(s) have UDP-N-acetylglucosamine transmembrane transporter activity	Aspergillus niger contig An03c0200, genomic contig	-2.5811	7.74705e-07	5.49887e-06
An03g06880	CAK38444	0	Ortholog(s) have signal sequence binding activity and role in Golgi to endosome transport, Golgi to vacuole transport, mitophagy, pexophagy, protein targeting to vacuole, vacuolar transport	Vacuolar protein sorting/targeting protein 10 (Carboxypeptidase Y receptor) (CPY receptor) (Sortilin vps10) (Vacuolar carboxypeptidase sorting receptor vps10)	-1.98064	2.50014e-19	1.46979e-17
An03g06360	CAK38392	0	Putative chitin synthase	Chitin synthase (EC 2.4.1.16)	-2.41255	3.02947e-11	4.99613e-10
An03g05310	CAK49183	0	Salicylate hydroxylase with a predicted role in salicylic acid degradation	Aspergillus niger contig An03c0160, genomic contig (EC 1.14.13.1)	-2.6802	4.05179e-18	1.96571e-16
An03g04970	CAK38289	0	Has domain(s) with predicted ATP binding, ATPase activity, ATPase-coupled transmembrane transporter activity, nucleoside-triphosphatase activity, nucleotide binding activity and role in transmembrane transport	Aspergillus niger contig An03c0150, genomic contig	-1.30959	0.00042363	0.00155179
An03g04410	CAK47880	0	Putative dolichyl-phosphate glucosyltransferase; expression enhanced by maltose; expression induced by tunicamycin and DTT	Dolichyl-phosphate beta-glucosyltransferase (EC 2.4.1.117)	-1.01218	1.28863e-05	6.90909e-05
An03g04060	CAK47845	0	ABC metal ion transporter	Aspergillus niger contig An03c0120, genomic contig	-1.2374	4.05677e-06	2.46914e-05
An03g02770	CAK44581	0	Ortholog(s) have hydrolase activity, acting on ester bonds, phosphoprotein phosphatase activity	Aspergillus niger contig An03c0080, genomic contig	-1.3144	6.84717e-09	7.02573e-08
An03g02270	CAK38196	0	Has domain(s) with predicted ion channel activity, role in ion transport, transmembrane transport and membrane localization	Hydrogen voltage-gated channel 1 (Voltage-gated hydrogen channel 1)	-2.53053	6.74444e-11	1.01512e-09
An03g00640	CAK38039	0	Ortholog of A. fumigatus Af293 : Afu2g17790, Neosartorya fischeri NRRL 181 : NFIA_093190, Aspergillus niger ATCC 1015 : 194162-mRNA and Aspergillus zonatus : Aspzo1_0112721, Aspzo1_0127952, Aspzo1_0154500	Aspergillus niger contig An03c0030, genomic contig (Fragment)	-2.05949	2.7876e-09	3.11625e-08
An02g14940	CAK37980	0	Putative flippase; expression enhanced by maltose; expression induced by tunicamycin and DTT	Oligosaccharide translocation protein RFT1	-1.65846	1.33098e-07	1.11592e-06
An02g14930	CAK37979	0	Oligosaccharyltransferase complex, gamma subunit; expression enhanced by maltose	Aspergillus niger contig An02c0480, genomic contig (EC 2.4.1.119)	-1.23869	3.53247e-05	0.00017022
An02g14280	CAK48859	0	Ortholog of S. cerevisiae : TDA6, A. nidulans FGSC A4 : AN7454, A. fumigatus Af293 : Afu2g05980, A. oryzae RIB40 : AO090001000716 and Aspergillus wentii : Aspwe1_0055229	Aspergillus niger contig An02c0460, genomic contig	-1.32011	7.55841e-06	4.30175e-05
An02g13460	CAK47759	0	Ortholog(s) have vitamin transmembrane transporter activity, role in vitamin transport and plasma membrane localization	Aspergillus niger contig An02c0440, genomic contig	-2.48282	1.3615e-08	1.34189e-07
An02g13450	CAK47758	0	Protein of unknown function	Aspergillus niger contig An02c0440, genomic contig	-1.51049	2.82007e-09	3.13851e-08
An02g13160	CAK47729	0	Has domain(s) with predicted oxidoreductase activity and role in oxidation-reduction process	Aspergillus niger contig An02c0440, genomic contig	-1.84449	9.11975e-14	2.2449e-12
An02g12220	CAK37903	0	Has domain(s) with predicted role in transmembrane transport and integral component of membrane localization	Aspergillus niger contig An02c0390, genomic contig	-1.28041	0.0382618	0.0749642
An02g11360	CAK44466	0	Ortholog of A. nidulans FGSC A4 : AN2953, A. fumigatus Af293 : Afu3g07890, A. oryzae RIB40 : AO090005001486, Aspergillus wentii : Aspwe1_0041944 and Aspergillus sydowii : Aspsy1_0056308	Alpha-galactosidase (EC 3.2.1.22)	-2.4341	2.14666e-17	9.32769e-16
An02g10700	CAK44419	0	Has domain(s) with predicted electron transfer activity, heme binding, iron ion binding, monooxygenase activity, oxidoreductase activity and acting on paired donors, more	Aspergillus niger contig An02c0310, genomic contig (EC 1.14.14.1)	-1.90232	1.78455e-19	1.07438e-17
An02g10650	CAK44414	0	Protein of unknown function	Uncharacterized protein	-1.89736	3.05285e-06	1.91647e-05
An02g10490	CAK44398	0	Has domain(s) with predicted hydrolase activity, hydrolyzing O-glycosyl compounds activity and role in carbohydrate metabolic process	Aspergillus niger contig An02c0310, genomic contig (EC 3.2.1.6)	-1.01206	0.0151675	0.0340197
An02g09390	CAK44342	yvc1	Calcium activated cation channel with a predicted role in cellular cation homeostasis	Aspergillus niger contig An02c0290, genomic contig	-1.03051	0.00802745	0.019779
An02g08740	CAK44283	0	Ortholog of A. nidulans FGSC A4 : AN8147, AN1625, A. fumigatus Af293 : Afu3g01080, Afu3g12760, A. oryzae RIB40 : AO090012000846, AO090023000643 and Aspergillus wentii : Aspwe1_0069172, Aspwe1_0169256	Uncharacterized protein	-1.45835	1.49895e-07	1.23398e-06
An02g08020	CAK37765	0	Putative H+-transporting ATPase lipid-binding protein	V-type proton ATPase proteolipid subunit	-1.05541	0.00734652	0.0183921
An02g06300	CAL00629	0	Has domain(s) with predicted peptidase activity and role in proteolysis	Aspergillus niger contig An02c0190, genomic contig (EC 3.4.17.-)	-1.76649	2.0745e-09	2.35597e-08
An02g05630	CAK47691	0	Ortholog(s) have potassium ion transmembrane transporter activity	Aspergillus niger contig An02c0160, genomic contig	-1.03382	0.022132	0.0468418
An02g04530	CAK37592	0	Has domain(s) with predicted role in lipid biosynthetic process	Aspergillus niger contig An02c0120, genomic contig (EC 2.1.1.79)	-1.46338	1.66002e-10	2.31707e-09
An02g04210	CAK37559	0	Has domain(s) with predicted ion channel activity, voltage-gated chloride channel activity, role in chloride transport, transmembrane transport and membrane localization	Chloride channel protein	-1.46311	7.67941e-06	4.35573e-05
An02g03728	CAL00586	0	Protein of unknown function	Aspergillus niger contig An02c0100, genomic contig	-1.0068	0.000154498	0.000637511
An02g03540	CAK47634	0	Ortholog(s) have fructose transmembrane transporter activity, glucose transmembrane transporter activity, mannose transmembrane transporter activity	Aspergillus niger contig An02c0090, genomic contig	-2.61543	2.51954e-14	6.76888e-13
An02g02660	CAK37547	dfgG	Predicted mannan endo-1,6-alpha-mannosidase; predicted role in carbohydrate catabolism	Mannan endo-1,6-alpha-mannosidase (EC 3.2.1.101)	-2.13794	4.36978e-30	9.29443e-28
An02g02480	CAK37529	0	Has domain(s) with predicted transmembrane transporter activity, role in transmembrane transport and integral component of membrane localization	Aspergillus niger contig An02c0060, genomic contig	-1.83778	1.42428e-10	2.05105e-09
An02g01520	CAK96369	0	Ortholog of S. cerevisiae : MTC6, A. nidulans FGSC A4 : AN6270, A. fumigatus Af293 : Afu2g12590, Aspergillus wentii : Aspwe1_0031301 and Aspergillus sydowii : Aspsy1_0089695	Aspergillus niger contig An02c0010, genomic contig	-1.44496	0.00331936	0.00932892
An02g01180	CAK96334	dppA	Putative diacylglycerol pyrophosphate phosphatase; induced by caspofungin	Aspergillus niger contig An02c0010, genomic contig	-4.15969	1.12976e-18	6.00578e-17
An01g13220	CAK96192	0	ER nucleotide exchange factor; expression enhanced by maltose; expression induced by tunicamycin and DTT	Aspergillus niger contig An01c0400, genomic contig	-1.31272	6.05343e-07	4.38391e-06
An01g12990	CAK37346	0	Ortholog(s) have glucosaminyl-phosphatidylinositol O-acyltransferase activity, role in GPI anchor biosynthetic process, cellular response to drug and integral component of membrane localization	GPI-anchored wall transfer protein (EC 2.3.-.-)	-1.80114	1.27787e-07	1.07681e-06
An01g12380	CAK37289	0	Ortholog(s) have role in azole transport, cellular response to drug, fluconazole transport and plasma membrane localization	Aspergillus niger contig An01c0360, genomic contig	-1.26788	1.84511e-05	9.51498e-05
An01g12200	CAK44119	0	Ortholog(s) have extracellular region localization	Aspergillus niger contig An01c0350, genomic contig	-2.38608	1.46837e-07	1.2128e-06
An01g10030	CAK37185	0	Sphinganine hydroxylase; induced by fenpropimorph	Aspergillus niger contig An01c0330, genomic contig (EC 1.14.-.-)	-1.29561	4.14089e-08	3.83185e-07
An01g08960	CAK37140	mcoH	Putative multicopper oxidase	Aspergillus niger contig An01c0300, genomic contig (EC 1.-.-.-)	-2.38253	3.74025e-14	9.78536e-13
An01g08530	CAK43942	kexB	Putative kexin; furin-type endoprotease; endoproteolytic proprotein processing enzyme; processes dibasic cleavage sites in target proteins destined for secretory pathway; required for maturation of glucoamylase	Kexin kexB-Aspergillus niger (EC 3.4.21.61)	-1.99734	2.66541e-12	5.34901e-11
An01g08460	CAK43935	0	Ortholog(s) have alpha-1,6-mannosyltransferase activity and role in dolichol-linked oligosaccharide biosynthetic process, protein glycosylation	Mannosyltransferase (EC 2.4.1.-)	-1.46287	0.00997981	0.0238152
An01g08420	CAK43931	clxA	Putative calnexin, integral membrane ER chaperone; expression enhanced by maltose; expression induced by tunicamycin and DTT	Aspergillus niger contig An01c0290, genomic contig	-1.50595	2.87182e-10	3.88902e-09
An01g07860	CAK37108	0	Has domain(s) with predicted sulfate transmembrane transporter activity, role in sulfate transport and integral component of membrane localization	Aspergillus niger contig An01c0280, genomic contig	-1.49932	6.91911e-07	4.94632e-06
An01g07000	CAK43818	0	C14 sterol reductase; predicted role in ergosterol synthesis; expression repressed by tunicamycin and DTT; induced by fenpropimorph	Aspergillus niger contig An01c0250, genomic contig (EC 1.1.-.-)	-2.42811	8.42106e-11	1.24497e-09
An01g06920	CAK43810	0	Has domain(s) with predicted ATP binding, ATPase activity, ATPase-coupled transmembrane transporter activity, nucleoside-triphosphatase activity, nucleotide binding activity and role in transmembrane transport	Aspergillus niger contig An01c0240, genomic contig	-3.27671	1.33357e-20	9.99158e-19
An01g05320	CAK43701	0	Ortholog of A. nidulans FGSC A4 : AN0294, A. fumigatus Af293 : Afu1g03090, A. oryzae RIB40 : AO090005000810, Aspergillus wentii : Aspwe1_0025587 and Aspergillus sydowii : Aspsy1_0040824	Aspergillus niger contig An01c0190, genomic contig	-2.21684	1.16599e-17	5.34537e-16
An01g05060	CAK37040	0	Ortholog of A. nidulans FGSC A4 : AN10031, A. fumigatus Af293 : Afu1g02910, A. oryzae RIB40 : AO090005000782, Aspergillus wentii : Aspwe1_0169592 and Aspergillus sydowii : Aspsy1_0076110	Aspergillus niger contig An01c0170, genomic contig	-1.53967	7.29744e-05	0.000327631
An01g04180	CAK36954	0	Ortholog(s) have triglyceride lipase activity, role in cellular detoxification, triglyceride mobilization and lipid droplet localization	Patatin-like phospholipase domain-containing protein An01g04180 (EC 3.1.1.-)	-1.26321	0.00220651	0.00654745
An01g01150	CAK43491	0	Protein of unknown function	Aspergillus niger contig An01c0050, genomic contig	-1.26217	0.00110281	0.00357144
